# Supplementary material
Source: publisher figshare collection journal article supplement (https://acs.figshare.com/ndownloader/files/8758258)
Supplement: Supplementary file 1 [file 8758258]

 
data_cd16021 
  
_audit_creation_method            SHELXL-2013 
_chemical_name_systematic 
; 
 ? 
; 
_chemical_name_common             ? 
_chemical_melting_point           ? 
_chemical_formula_moiety          ? 
_chemical_formula_sum 
 'C36 H48 B N O5 Si' 
_chemical_formula_weight          613.65 
  
loop_ 
 _atom_type_symbol 
 _atom_type_description 
 _atom_type_scat_dispersion_real 
 _atom_type_scat_dispersion_imag 
 _atom_type_scat_source 
 'C'  'C'   0.0033   0.0016 
 'International Tables Vol C Tables 4.2.6.8 and 6.1.1.4' 
 'H'  'H'   0.0000   0.0000 
 'International Tables Vol C Tables 4.2.6.8 and 6.1.1.4' 
 'B'  'B'   0.0013   0.0007 
 'International Tables Vol C Tables 4.2.6.8 and 6.1.1.4' 
 'N'  'N'   0.0061   0.0033 
 'International Tables Vol C Tables 4.2.6.8 and 6.1.1.4' 
 'O'  'O'   0.0106   0.0060 
 'International Tables Vol C Tables 4.2.6.8 and 6.1.1.4' 
 'Si'  'Si'   0.0817   0.0704 
 'International Tables Vol C Tables 4.2.6.8 and 6.1.1.4' 
  
_space_group_crystal_system       triclinic 
_space_group_IT_number            2 
_space_group_name_H-M_alt         'P -1' 
_space_group_name_Hall            '-P 1' 
  
_shelx_space_group_comment 
; 
The symmetry employed for this shelxl refinement is uniquely defined 
by the following loop, which should always be used as a source of 
symmetry information in preference to the above space-group names. 
They are only intended as comments. 
; 
  
loop_ 
 _space_group_symop_operation_xyz 
 'x, y, z' 
 '-x, -y, -z' 
  
_cell_length_a                    7.2437(12) 
_cell_length_b                    15.956(3) 
_cell_length_c                    15.979(3) 
_cell_angle_alpha                 93.500(4) 
_cell_angle_beta                  95.990(4) 
_cell_angle_gamma                 100.034(4) 
_cell_volume                      1802.7(5) 
_cell_formula_units_Z             2 
_cell_measurement_temperature     293(2) 
_cell_measurement_reflns_used     1015 
_cell_measurement_theta_min       5.573 
_cell_measurement_theta_max       37.651 
  
_exptl_crystal_description        prismatic 
_exptl_crystal_colour             colorless 
_exptl_crystal_density_meas       ? 
_exptl_crystal_density_method     ? 
_exptl_crystal_density_diffrn     1.131 
_exptl_crystal_F_000              660 
_exptl_transmission_factor_min    ? 
_exptl_transmission_factor_max    ? 
_exptl_crystal_size_max           0.180 
_exptl_crystal_size_mid           0.140 
_exptl_crystal_size_min           0.080 
_exptl_absorpt_coefficient_mu     0.105 
_shelx_estimated_absorpt_T_min    0.981 
_shelx_estimated_absorpt_T_max    0.992 
_exptl_absorpt_correction_type    multi-scan 
_exptl_absorpt_correction_T_min   0.6098 
_exptl_absorpt_correction_T_max   0.7456 
_exptl_absorpt_process_details    sadabs 
  
_exptl_special_details 
; 
 ? 
; 
  
_diffrn_ambient_temperature       293(2) 
_diffrn_radiation_wavelength      0.71073 
_diffrn_radiation_type            MoK\a 
_diffrn_source                    ? 
_diffrn_measurement_device_type   'CCD area detector' 
_diffrn_measurement_method        'phi and omega scans' 
_diffrn_detector_area_resol_mean  ? 
_diffrn_reflns_number             10026 
_diffrn_reflns_av_unetI/netI      0.0934 
_diffrn_reflns_av_R_equivalents   0.0433 
_diffrn_reflns_limit_h_min        -8 
_diffrn_reflns_limit_h_max        8 
_diffrn_reflns_limit_k_min        -18 
_diffrn_reflns_limit_k_max        18 
_diffrn_reflns_limit_l_min        -19 
_diffrn_reflns_limit_l_max        15 
_diffrn_reflns_theta_min          1.753 
_diffrn_reflns_theta_max          24.998 
_diffrn_reflns_theta_full         25.242 
_diffrn_measured_fraction_theta_max   0.998 
_diffrn_measured_fraction_theta_full  0.969 
_diffrn_reflns_Laue_measured_fraction_max    0.998 
_diffrn_reflns_Laue_measured_fraction_full   0.969 
_diffrn_reflns_point_group_measured_fraction_max   0.998 
_diffrn_reflns_point_group_measured_fraction_full  0.969 
_reflns_number_total              6332 
_reflns_number_gt                 2958 
_reflns_threshold_expression      'I > 2\s(I)' 
_reflns_Friedel_coverage          0.000 
_reflns_Friedel_fraction_max      . 
_reflns_Friedel_fraction_full     . 
  
_reflns_special_details 
; 
 Reflections were merged by SHELXL according to the crystal 
 class for the calculation of statistics and refinement. 
  
 _reflns_Friedel_fraction is defined as the number of unique 
 Friedel pairs measured divided by the number that would be 
 possible theoretically, ignoring centric projections and 
 systematic absences. 
; 
  
_computing_data_collection        'Bruker SMART' 
_computing_cell_refinement        'Bruker SMART' 
_computing_data_reduction         'Bruker SHELXTL' 
_computing_structure_solution     'Bruker SHELXTL' 
_computing_structure_refinement   'SHELXL-2013 (Sheldrick, 2013)' 
_computing_molecular_graphics     'Bruker SHELXTL' 
_computing_publication_material   'Bruker SHELXTL' 
  
_refine_special_details 
; 
 ? 
; 
_refine_ls_structure_factor_coef  Fsqd 
_refine_ls_matrix_type            full 
_refine_ls_weighting_scheme       calc 
_refine_ls_weighting_details 
'w=1/[\s^2^(Fo^2^)+(0.2000P)^2^] where P=(Fo^2^+2Fc^2^)/3' 
_atom_sites_solution_primary      ? 
_atom_sites_solution_secondary    ? 
_atom_sites_solution_hydrogens    mixed 
_refine_ls_hydrogen_treatment     mixed 
_refine_ls_extinction_method      none 
_refine_ls_extinction_coef        . 
_refine_ls_number_reflns          6332 
_refine_ls_number_parameters      599 
_refine_ls_number_restraints      243 
_refine_ls_R_factor_all           0.1802 
_refine_ls_R_factor_gt            0.1021 
_refine_ls_wR_factor_ref          0.3626 
_refine_ls_wR_factor_gt           0.2993 
_refine_ls_goodness_of_fit_ref    1.065 
_refine_ls_restrained_S_all       1.094 
_refine_ls_shift/su_max           0.043 
_refine_ls_shift/su_mean          0.003 
  
loop_ 
 _atom_site_label 
 _atom_site_type_symbol 
 _atom_site_fract_x 
 _atom_site_fract_y 
 _atom_site_fract_z 
 _atom_site_U_iso_or_equiv 
 _atom_site_adp_type 
 _atom_site_occupancy 
 _atom_site_site_symmetry_order 
 _atom_site_calc_flag 
 _atom_site_refinement_flags_posn 
 _atom_site_refinement_flags_adp 
 _atom_site_refinement_flags_occupancy 
 _atom_site_disorder_assembly 
 _atom_site_disorder_group 
Si1 Si 1.2760(3) 0.39291(13) 0.25373(17) 0.0781(8) Uani 0.7 1 d . U P A 1 
C31 C 1.332(2) 0.3997(10) 0.1443(10) 0.098(5) Uani 0.6 1 d . U P A 1 
H31A H 1.2454 0.3569 0.1080 0.147 Uiso 0.6 1 calc R U P A 1 
H31B H 1.4585 0.3905 0.1412 0.147 Uiso 0.6 1 calc R U P A 1 
H31C H 1.3205 0.4552 0.1267 0.147 Uiso 0.6 1 calc R U P A 1 
C32 C 1.374(3) 0.2981(11) 0.2871(15) 0.090(4) Uani 0.6 1 d . U P A 1 
H32A H 1.3874 0.2989 0.3476 0.134 Uiso 0.6 1 calc R U P A 1 
H32B H 1.4958 0.2996 0.2676 0.134 Uiso 0.6 1 calc R U P A 1 
H32C H 1.2907 0.2469 0.2633 0.134 Uiso 0.6 1 calc R U P A 1 
C33 C 1.3694(14) 0.4939(6) 0.3177(6) 0.112(3) Uani 0.7 1 d D U P A 1 
C34 C 1.309(2) 0.5685(9) 0.2755(12) 0.159(6) Uani 0.7 1 d D U P A 1 
H34A H 1.3914 0.6205 0.2988 0.239 Uiso 0.7 1 calc R U P A 1 
H34B H 1.1819 0.5714 0.2850 0.239 Uiso 0.7 1 calc R U P A 1 
H34C H 1.3170 0.5612 0.2160 0.239 Uiso 0.7 1 calc R U P A 1 
C35 C 1.588(2) 0.5155(13) 0.3222(15) 0.164(8) Uani 0.6 1 d D U P A 1 
H35A H 1.6226 0.5298 0.2678 0.246 Uiso 0.6 1 calc R U P A 1 
H35B H 1.6402 0.4669 0.3387 0.246 Uiso 0.6 1 calc R U P A 1 
H35C H 1.6353 0.5631 0.3629 0.246 Uiso 0.6 1 calc R U P A 1 
C36 C 1.313(3) 0.4861(13) 0.4081(9) 0.141(7) Uani 0.6 1 d D U P A 1 
H36A H 1.3825 0.5338 0.4446 0.211 Uiso 0.6 1 calc R U P A 1 
H36B H 1.3419 0.4340 0.4285 0.211 Uiso 0.6 1 calc R U P A 1 
H36C H 1.1804 0.4858 0.4072 0.211 Uiso 0.6 1 calc R U P A 1 
Si1' Si 1.1868(10) 0.4492(4) 0.3069(4) 0.1066(19) Uani 0.3 1 d D U P A 2 
C31' C 1.183(3) 0.5600(14) 0.2791(17) 0.109(6) Uani 0.4 1 d . U P A 2 
H31D H 1.1741 0.5616 0.2189 0.164 Uiso 0.4 1 calc R U P A 2 
H31E H 1.2962 0.5968 0.3048 0.164 Uiso 0.4 1 calc R U P A 2 
H31F H 1.0753 0.5789 0.2994 0.164 Uiso 0.4 1 calc R U P A 2 
C32' C 1.228(5) 0.456(2) 0.4237(19) 0.157(12) Uani 0.4 1 d . U P A 2 
H32D H 1.1092 0.4507 0.4463 0.236 Uiso 0.4 1 calc R U P A 2 
H32E H 1.3052 0.5100 0.4440 0.236 Uiso 0.4 1 calc R U P A 2 
H32F H 1.2909 0.4106 0.4412 0.236 Uiso 0.4 1 calc R U P A 2 
C33' C 1.386(3) 0.4209(15) 0.2553(13) 0.111(8) Uani 0.3 1 d D U P A 2 
C34' C 1.391(8) 0.3253(19) 0.278(4) 0.124(17) Uani 0.3 1 d D U P A 2 
H34D H 1.3094 0.2861 0.2368 0.185 Uiso 0.3 1 calc R U P A 2 
H34E H 1.3499 0.3176 0.3330 0.185 Uiso 0.3 1 calc R U P A 2 
H34F H 1.5180 0.3147 0.2791 0.185 Uiso 0.3 1 calc R U P A 2 
C35' C 1.583(4) 0.4775(19) 0.295(2) 0.157(12) Uani 0.4 1 d D U P A 2 
H35D H 1.6845 0.4552 0.2728 0.235 Uiso 0.4 1 calc R U P A 2 
H35E H 1.5960 0.4759 0.3554 0.235 Uiso 0.4 1 calc R U P A 2 
H35F H 1.5878 0.5354 0.2811 0.235 Uiso 0.4 1 calc R U P A 2 
C36' C 1.379(4) 0.4359(16) 0.1566(13) 0.117(9) Uani 0.4 1 d D U P A 2 
H36D H 1.5001 0.4649 0.1450 0.176 Uiso 0.4 1 calc R U P A 2 
H36E H 1.2852 0.4699 0.1418 0.176 Uiso 0.4 1 calc R U P A 2 
H36F H 1.3470 0.3817 0.1240 0.176 Uiso 0.4 1 calc R U P A 2 
N1 N 0.5619(5) 0.1115(3) 0.0619(2) 0.0582(10) Uani 1 1 d . . . . . 
O1 O 0.2851(5) 0.0358(2) -0.0048(2) 0.0797(11) Uani 1 1 d . . . . . 
O2 O 0.2953(4) 0.16281(19) 0.0681(2) 0.0702(10) Uani 1 1 d . . . . . 
O5 O 1.0337(5) 0.3789(2) 0.2619(2) 0.0867(11) Uani 1 1 d . . . . . 
B1 B 0.9026(9) 0.2267(4) 0.3441(3) 0.0658(15) Uani 1 1 d . . . . . 
C1 C 0.7151(6) 0.2621(3) 0.0824(3) 0.0564(11) Uani 1 1 d . . . . . 
C2 C 0.6486(7) 0.2779(3) -0.0014(3) 0.0728(14) Uani 1 1 d . . . . . 
H2 H 0.5774 0.2334 -0.0376 0.087 Uiso 1 1 calc R U . . . 
C3 C 0.6878(8) 0.3572(4) -0.0290(4) 0.0887(17) Uani 1 1 d . . . . . 
H3 H 0.6429 0.3665 -0.0837 0.106 Uiso 1 1 calc R U . . . 
C4 C 0.7944(8) 0.4245(4) 0.0239(4) 0.0923(18) Uani 1 1 d . . . . . 
H4 H 0.8164 0.4788 0.0048 0.111 Uiso 1 1 calc R U . . . 
C5 C 0.8674(7) 0.4121(3) 0.1036(4) 0.0808(15) Uani 1 1 d . . . . . 
H5 H 0.9402 0.4577 0.1379 0.097 Uiso 1 1 calc R U . . . 
C6 C 0.8321(6) 0.3298(3) 0.1339(3) 0.0605(12) Uani 1 1 d . . . . . 
C7 C 0.9097(6) 0.3141(3) 0.2166(3) 0.0635(12) Uani 1 1 d . . . . . 
C8 C 0.8550(6) 0.2373(3) 0.2498(3) 0.0577(11) Uani 1 1 d . . . . . 
C9 C 0.7339(6) 0.1696(3) 0.1969(3) 0.0552(11) Uani 1 1 d . . . . . 
C10 C 0.6697(6) 0.1823(3) 0.1154(3) 0.0528(11) Uani 1 1 d . . . . . 
C11 C 0.3753(7) 0.0981(3) 0.0381(3) 0.0614(12) Uani 1 1 d . . . . . 
C12 C 0.1001(6) 0.1583(3) 0.0390(4) 0.0785(15) Uani 1 1 d . . . . . 
H12A H 0.0421 0.1884 0.0807 0.094 Uiso 1 1 calc R U . . . 
H12B H 0.0371 0.0991 0.0329 0.094 Uiso 1 1 calc R U . . . 
C13 C 0.0723(7) 0.1968(4) -0.0448(4) 0.0796(15) Uani 1 1 d . . . . . 
C14 C -0.0527(11) 0.1571(6) -0.1088(5) 0.129(3) Uani 1 1 d . . . . . 
H14 H -0.1226 0.1035 -0.1030 0.155 Uiso 1 1 calc R U . . . 
C15 C -0.0789(18) 0.1961(10) -0.1848(7) 0.183(5) Uani 1 1 d . . . . . 
H15 H -0.1664 0.1681 -0.2288 0.219 Uiso 1 1 calc R U . . . 
C16 C 0.0201(19) 0.2726(11) -0.1945(7) 0.171(5) Uani 1 1 d . . . . . 
H16 H 0.0029 0.2971 -0.2454 0.206 Uiso 1 1 calc R U . . . 
C17 C 0.1409(14) 0.3134(6) -0.1332(7) 0.142(3) Uani 1 1 d . . . . . 
H17 H 0.2086 0.3672 -0.1401 0.171 Uiso 1 1 calc R U . . . 
C18 C 0.1690(10) 0.2759(5) -0.0561(5) 0.114(2) Uani 1 1 d . . . . . 
H18 H 0.2549 0.3055 -0.0124 0.137 Uiso 1 1 calc R U . . . 
C19 C 0.6790(8) 0.0851(3) 0.2295(3) 0.0696(12) Uani 1 1 d . U . . . 
O3 O 1.0711(10) 0.2416(5) 0.3925(4) 0.1089(18) Uani 0.6 1 d . U P B 1 
O4 O 0.7645(10) 0.1924(5) 0.3942(4) 0.1074(18) Uani 0.6 1 d . U P B 1 
C20 C 0.815(3) 0.0334(13) 0.2349(14) 0.074(2) Uani 0.5 1 d . U P C 1 
H20 H 0.9268 0.0509 0.2120 0.089 Uiso 0.5 1 calc R U P C 1 
C21 C 0.7896(16) -0.0485(7) 0.2758(8) 0.086(2) Uani 0.5 1 d D U P C 1 
H21A H 0.8409 -0.0391 0.3348 0.103 Uiso 0.5 1 calc R U P C 1 
H21B H 0.8542 -0.0888 0.2480 0.103 Uiso 0.5 1 calc R U P C 1 
C22 C 0.5665(18) -0.0849(7) 0.2669(10) 0.090(2) Uani 0.5 1 d D U P C 1 
H22A H 0.5138 -0.0937 0.2080 0.108 Uiso 0.5 1 calc R U P C 1 
H22B H 0.5407 -0.1387 0.2925 0.108 Uiso 0.5 1 calc R U P C 1 
C23 C 0.481(2) -0.0138(8) 0.3151(8) 0.085(2) Uani 0.5 1 d D U P C 1 
H23A H 0.3499 -0.0342 0.3220 0.102 Uiso 0.5 1 calc R U P C 1 
H23B H 0.5516 0.0035 0.3702 0.102 Uiso 0.5 1 calc R U P C 1 
C24 C 0.500(3) 0.0601(10) 0.2584(14) 0.075(2) Uani 0.5 1 d D U P C 1 
H24A H 0.4064 0.0446 0.2095 0.090 Uiso 0.5 1 calc R U P C 1 
H24B H 0.4695 0.1093 0.2890 0.090 Uiso 0.5 1 calc R U P C 1 
O3' O 0.9388(17) 0.2927(9) 0.3998(6) 0.117(2) Uani 0.4 1 d . U P B 2 
O4' O 0.9319(17) 0.1602(9) 0.3776(6) 0.116(2) Uani 0.4 1 d . U P B 2 
C20' C 0.786(5) 0.0227(19) 0.225(2) 0.144(5) Uani 0.5 1 d . U P C 2 
H20' H 0.9086 0.0349 0.2111 0.173 Uiso 0.5 1 calc R U P C 2 
C21' C 0.692(4) -0.0733(11) 0.2439(12) 0.149(4) Uani 0.5 1 d D U P C 2 
H21C H 0.6190 -0.1034 0.1932 0.179 Uiso 0.5 1 calc R U P C 2 
H21D H 0.7897 -0.1048 0.2623 0.179 Uiso 0.5 1 calc R U P C 2 
C22' C 0.566(3) -0.0658(13) 0.3121(13) 0.151(4) Uani 0.5 1 d D U P C 2 
H22C H 0.5111 -0.1223 0.3266 0.181 Uiso 0.5 1 calc R U P C 2 
H22D H 0.6388 -0.0349 0.3624 0.181 Uiso 0.5 1 calc R U P C 2 
C23' C 0.409(3) -0.0189(11) 0.2813(13) 0.151(4) Uani 0.5 1 d D U P C 2 
H23C H 0.3239 -0.0156 0.3239 0.181 Uiso 0.5 1 calc R U P C 2 
H23D H 0.3375 -0.0484 0.2301 0.181 Uiso 0.5 1 calc R U P C 2 
C24' C 0.505(5) 0.0709(14) 0.264(2) 0.149(5) Uani 0.5 1 d D U P C 2 
H24C H 0.4155 0.0938 0.2271 0.179 Uiso 0.5 1 calc R U P C 2 
H24D H 0.5244 0.1056 0.3175 0.179 Uiso 0.5 1 calc R U P C 2 
C25 C 1.050(2) 0.2034(10) 0.4729(7) 0.117(3) Uani 0.6 1 d D U P B 1 
C26 C 0.853(2) 0.2055(12) 0.4824(8) 0.120(3) Uani 0.6 1 d D U P B 1 
C27 C 0.811(3) 0.2923(11) 0.5159(10) 0.147(4) Uani 0.6 1 d . U P B 1 
H27A H 0.9130 0.3371 0.5081 0.221 Uiso 0.6 1 calc R U P B 1 
H27B H 0.7964 0.2912 0.5749 0.221 Uiso 0.6 1 calc R U P B 1 
H27C H 0.6962 0.3024 0.4856 0.221 Uiso 0.6 1 calc R U P B 1 
C28 C 0.753(3) 0.1321(13) 0.5292(9) 0.131(4) Uani 0.5 1 d . U P B 1 
H28A H 0.6197 0.1307 0.5216 0.196 Uiso 0.5 1 calc R U P B 1 
H28B H 0.7986 0.1411 0.5883 0.196 Uiso 0.5 1 calc R U P B 1 
H28C H 0.7799 0.0788 0.5069 0.196 Uiso 0.5 1 calc R U P B 1 
C29 C 1.105(3) 0.1139(10) 0.4618(9) 0.121(4) Uani 0.5 1 d . U P B 1 
H29A H 0.9978 0.0737 0.4347 0.181 Uiso 0.5 1 calc R U P B 1 
H29B H 1.1431 0.0960 0.5162 0.181 Uiso 0.5 1 calc R U P B 1 
H29C H 1.2069 0.1168 0.4278 0.181 Uiso 0.5 1 calc R U P B 1 
C30 C 1.193(2) 0.2583(11) 0.5405(7) 0.139(4) Uani 0.6 1 d . U P B 1 
H30A H 1.3172 0.2484 0.5333 0.208 Uiso 0.6 1 calc R U P B 1 
H30B H 1.1627 0.2435 0.5955 0.208 Uiso 0.6 1 calc R U P B 1 
H30C H 1.1878 0.3175 0.5352 0.208 Uiso 0.6 1 calc R U P B 1 
C25' C 0.926(5) 0.264(2) 0.4799(19) 0.182(6) Uani 0.4 1 d D U P B 2 
C26' C 0.953(6) 0.172(2) 0.474(2) 0.181(6) Uani 0.4 1 d D U P B 2 
C27' C 1.175(5) 0.163(2) 0.4868(18) 0.185(7) Uani 0.4 1 d . U P B 2 
H27D H 1.2090 0.1387 0.4353 0.277 Uiso 0.4 1 calc R U P B 2 
H27E H 1.1952 0.1265 0.5312 0.277 Uiso 0.4 1 calc R U P B 2 
H27F H 1.2518 0.2183 0.5015 0.277 Uiso 0.4 1 calc R U P B 2 
C28' C 0.851(4) 0.1012(15) 0.5065(14) 0.183(6) Uani 0.5 1 d . U P B 2 
H28D H 0.8805 0.1055 0.5668 0.275 Uiso 0.5 1 calc R U P B 2 
H28E H 0.8846 0.0498 0.4829 0.275 Uiso 0.5 1 calc R U P B 2 
H28F H 0.7186 0.0997 0.4923 0.275 Uiso 0.5 1 calc R U P B 2 
C29' C 0.710(4) 0.2390(17) 0.5206(15) 0.193(7) Uani 0.5 1 d . U P B 2 
H29D H 0.6204 0.2027 0.4795 0.290 Uiso 0.5 1 calc R U P B 2 
H29E H 0.6643 0.2907 0.5335 0.290 Uiso 0.5 1 calc R U P B 2 
H29F H 0.7268 0.2102 0.5710 0.290 Uiso 0.5 1 calc R U P B 2 
C30' C 1.052(5) 0.3245(18) 0.5483(15) 0.191(7) Uani 0.4 1 d . U P B 2 
H30D H 1.1765 0.3384 0.5318 0.286 Uiso 0.4 1 calc R U P B 2 
H30E H 1.0575 0.2977 0.6004 0.286 Uiso 0.4 1 calc R U P B 2 
H30F H 1.0008 0.3757 0.5557 0.286 Uiso 0.4 1 calc R U P B 2 
H1 H 0.614(8) 0.063(3) 0.056(3) 0.093(16) Uiso 1 1 d . . . . . 
  
loop_ 
 _atom_site_aniso_label 
 _atom_site_aniso_U_11 
 _atom_site_aniso_U_22 
 _atom_site_aniso_U_33 
 _atom_site_aniso_U_23 
 _atom_site_aniso_U_13 
 _atom_site_aniso_U_12 
Si1 0.0518(14) 0.0589(12) 0.1176(19) -0.0003(12) -0.0088(12) 0.0074(11) 
C31 0.065(7) 0.117(11) 0.101(8) -0.027(7) 0.026(6) -0.010(7) 
C32 0.065(7) 0.071(8) 0.146(10) 0.037(8) 0.015(7) 0.037(7) 
C33 0.101(6) 0.101(6) 0.118(6) 0.007(5) -0.012(5) -0.013(5) 
C34 0.194(14) 0.086(7) 0.195(13) 0.001(8) 0.023(12) 0.022(10) 
C35 0.117(11) 0.153(14) 0.183(15) -0.025(11) -0.025(10) -0.042(10) 
C36 0.148(14) 0.177(14) 0.078(9) -0.040(9) -0.004(8) 0.004(11) 
Si1' 0.104(5) 0.108(4) 0.098(4) -0.006(3) 0.008(3) 0.000(4) 
C31' 0.132(15) 0.076(10) 0.117(12) -0.005(8) 0.019(12) 0.012(11) 
C32' 0.16(2) 0.167(19) 0.124(16) -0.010(13) 0.002(14) -0.008(15) 
C33' 0.101(11) 0.133(12) 0.099(11) 0.001(9) 0.017(9) 0.019(9) 
C34' 0.12(2) 0.09(2) 0.17(2) 0.036(16) 0.039(15) 0.031(16) 
C35' 0.145(18) 0.159(19) 0.153(18) -0.011(15) 0.012(13) 0.002(14) 
C36' 0.131(18) 0.120(16) 0.098(13) 0.017(12) 0.000(11) 0.019(13) 
N1 0.044(2) 0.062(2) 0.070(2) 0.0024(19) 0.0042(18) 0.0178(19) 
O1 0.061(2) 0.071(2) 0.101(3) -0.018(2) -0.0082(18) 0.0125(18) 
O2 0.050(2) 0.075(2) 0.086(2) -0.0086(17) 0.0064(16) 0.0211(17) 
O5 0.089(3) 0.060(2) 0.096(3) 0.0054(18) -0.030(2) -0.0017(19) 
B1 0.075(4) 0.066(3) 0.058(3) 0.010(3) -0.002(3) 0.021(3) 
C1 0.042(3) 0.070(3) 0.059(3) 0.012(2) 0.006(2) 0.013(2) 
C2 0.055(3) 0.094(4) 0.071(3) 0.026(3) -0.001(2) 0.014(3) 
C3 0.071(4) 0.116(5) 0.080(4) 0.049(4) 0.002(3) 0.007(3) 
C4 0.069(4) 0.096(4) 0.111(5) 0.059(4) -0.003(3) 0.003(3) 
C5 0.055(3) 0.074(3) 0.111(4) 0.033(3) -0.006(3) 0.002(3) 
C6 0.045(3) 0.072(3) 0.067(3) 0.022(2) 0.005(2) 0.012(2) 
C7 0.055(3) 0.063(3) 0.071(3) 0.006(2) -0.003(2) 0.013(2) 
C8 0.047(3) 0.059(3) 0.067(3) 0.010(2) 0.000(2) 0.014(2) 
C9 0.045(2) 0.055(3) 0.068(3) 0.010(2) 0.006(2) 0.014(2) 
C10 0.039(2) 0.060(3) 0.061(3) 0.004(2) 0.005(2) 0.014(2) 
C11 0.047(3) 0.072(3) 0.067(3) 0.005(2) 0.004(2) 0.017(3) 
C12 0.042(3) 0.086(3) 0.107(4) -0.002(3) 0.007(3) 0.016(3) 
C13 0.050(3) 0.092(4) 0.098(4) -0.003(3) 0.005(3) 0.022(3) 
C14 0.100(6) 0.163(7) 0.111(6) -0.012(5) -0.016(4) 0.011(5) 
C15 0.169(11) 0.256(14) 0.102(7) -0.011(9) -0.035(6) 0.021(10) 
C16 0.138(10) 0.263(15) 0.126(8) 0.039(10) -0.003(7) 0.074(10) 
C17 0.122(7) 0.159(8) 0.165(8) 0.069(7) 0.024(6) 0.055(6) 
C18 0.102(5) 0.111(5) 0.127(6) 0.019(4) -0.006(4) 0.020(4) 
C19 0.077(3) 0.064(3) 0.072(3) 0.017(2) 0.016(2) 0.016(2) 
O3 0.090(4) 0.169(5) 0.064(3) 0.033(3) -0.010(3) 0.016(3) 
O4 0.097(4) 0.167(5) 0.056(3) 0.031(3) -0.001(3) 0.016(3) 
C20 0.083(4) 0.065(4) 0.081(4) 0.021(3) 0.011(3) 0.025(3) 
C21 0.097(4) 0.071(4) 0.092(4) 0.021(3) 0.005(4) 0.019(4) 
C22 0.100(4) 0.075(4) 0.093(4) 0.024(4) 0.013(4) 0.007(4) 
C23 0.091(4) 0.074(4) 0.088(4) 0.027(3) 0.014(4) 0.002(4) 
C24 0.079(4) 0.068(4) 0.079(4) 0.023(3) 0.016(3) 0.008(3) 
O3' 0.110(4) 0.169(5) 0.068(3) 0.028(4) -0.006(3) 0.016(4) 
O4' 0.108(4) 0.168(5) 0.069(3) 0.028(4) -0.009(3) 0.020(4) 
C20' 0.191(12) 0.101(8) 0.155(9) 0.045(7) 0.041(8) 0.039(8) 
C21' 0.195(11) 0.106(7) 0.157(9) 0.043(7) 0.039(8) 0.034(7) 
C22' 0.197(11) 0.110(7) 0.154(9) 0.046(7) 0.038(7) 0.027(7) 
C23' 0.195(11) 0.113(7) 0.151(9) 0.050(7) 0.037(8) 0.023(7) 
C24' 0.193(12) 0.112(8) 0.149(9) 0.050(7) 0.038(8) 0.020(8) 
C25 0.138(7) 0.164(7) 0.057(4) 0.040(5) -0.002(4) 0.052(6) 
C26 0.140(7) 0.171(7) 0.058(4) 0.034(5) 0.011(4) 0.047(6) 
C27 0.164(9) 0.190(9) 0.094(7) 0.012(7) 0.021(7) 0.043(8) 
C28 0.147(9) 0.180(9) 0.072(6) 0.047(7) 0.032(6) 0.025(8) 
C29 0.149(9) 0.152(9) 0.074(6) 0.039(6) -0.011(6) 0.068(7) 
C30 0.142(8) 0.189(9) 0.078(6) 0.024(6) -0.028(6) 0.030(7) 
C25' 0.221(15) 0.208(13) 0.119(9) 0.031(9) 0.037(9) 0.024(12) 
C26' 0.220(15) 0.206(13) 0.119(9) 0.037(8) 0.033(9) 0.027(12) 
C27' 0.218(17) 0.211(15) 0.126(11) 0.037(11) 0.025(11) 0.030(14) 
C28' 0.226(17) 0.200(14) 0.126(10) 0.049(10) 0.024(10) 0.031(12) 
C29' 0.223(16) 0.219(15) 0.137(10) 0.021(10) 0.048(10) 0.022(13) 
C30' 0.230(17) 0.211(15) 0.124(10) 0.023(10) 0.034(11) 0.010(13) 
  
_geom_special_details 
; 
 All esds (except the esd in the dihedral angle between two l.s. planes) 
 are estimated using the full covariance matrix.  The cell esds are taken 
 into account individually in the estimation of esds in distances, angles 
 and torsion angles; correlations between esds in cell parameters are only 
 used when they are defined by crystal symmetry.  An approximate (isotropic) 
 treatment of cell esds is used for estimating esds involving l.s. planes. 
; 
  
loop_ 
 _geom_bond_atom_site_label_1 
 _geom_bond_atom_site_label_2 
 _geom_bond_distance 
 _geom_bond_site_symmetry_2 
 _geom_bond_publ_flag 
Si1 O5 1.750(4) . ? 
Si1 C33 1.837(10) . ? 
Si1 C31 1.840(15) . ? 
Si1 C32 1.865(15) . ? 
C31 H31A 0.9600 . ? 
C31 H31B 0.9600 . ? 
C31 H31C 0.9600 . ? 
C32 H32A 0.9600 . ? 
C32 H32B 0.9600 . ? 
C32 H32C 0.9600 . ? 
C33 C34 1.509(14) . ? 
C33 C35 1.551(15) . ? 
C33 C36 1.548(14) . ? 
C34 H34A 0.9600 . ? 
C34 H34B 0.9600 . ? 
C34 H34C 0.9600 . ? 
C35 H35A 0.9600 . ? 
C35 H35B 0.9600 . ? 
C35 H35C 0.9600 . ? 
C36 H36A 0.9600 . ? 
C36 H36B 0.9600 . ? 
C36 H36C 0.9600 . ? 
Si1' O5 1.518(7) . ? 
Si1' C33' 1.843(16) . ? 
Si1' C32' 1.85(3) . ? 
Si1' C31' 1.85(2) . ? 
C31' H31D 0.9600 . ? 
C31' H31E 0.9600 . ? 
C31' H31F 0.9600 . ? 
C32' H32D 0.9600 . ? 
C32' H32E 0.9600 . ? 
C32' H32F 0.9600 . ? 
C33' C35' 1.596(18) . ? 
C33' C34' 1.597(19) . ? 
C33' C36' 1.607(18) . ? 
C34' H34D 0.9600 . ? 
C34' H34E 0.9600 . ? 
C34' H34F 0.9600 . ? 
C35' H35D 0.9600 . ? 
C35' H35E 0.9600 . ? 
C35' H35F 0.9600 . ? 
C36' H36D 0.9600 . ? 
C36' H36E 0.9600 . ? 
C36' H36F 0.9600 . ? 
N1 C11 1.341(6) . ? 
N1 C10 1.433(5) . ? 
N1 H1 0.92(5) . ? 
O1 C11 1.217(5) . ? 
O2 C11 1.357(5) . ? 
O2 C12 1.430(5) . ? 
O5 C7 1.361(5) . ? 
B1 O4' 1.257(12) . ? 
B1 O3' 1.308(13) . ? 
B1 O3 1.351(9) . ? 
B1 O4 1.404(9) . ? 
B1 C8 1.537(7) . ? 
C1 C10 1.408(6) . ? 
C1 C6 1.410(6) . ? 
C1 C2 1.427(6) . ? 
C2 C3 1.359(7) . ? 
C2 H2 0.9300 . ? 
C3 C4 1.388(7) . ? 
C3 H3 0.9300 . ? 
C4 C5 1.366(7) . ? 
C4 H4 0.9300 . ? 
C5 C6 1.418(6) . ? 
C5 H5 0.9300 . ? 
C6 C7 1.435(6) . ? 
C7 C8 1.376(6) . ? 
C8 C9 1.433(6) . ? 
C9 C10 1.376(6) . ? 
C9 C19 1.480(6) . ? 
C12 C13 1.516(8) . ? 
C12 H12A 0.9700 . ? 
C12 H12B 0.9700 . ? 
C13 C14 1.340(8) . ? 
C13 C18 1.364(8) . ? 
C14 C15 1.408(13) . ? 
C14 H14 0.9300 . ? 
C15 C16 1.329(14) . ? 
C15 H15 0.9300 . ? 
C16 C17 1.301(13) . ? 
C16 H16 0.9300 . ? 
C17 C18 1.412(10) . ? 
C17 H17 0.9300 . ? 
C18 H18 0.9300 . ? 
C19 C20' 1.36(4) . ? 
C19 C20 1.39(2) . ? 
C19 C24' 1.42(4) . ? 
C19 C24 1.42(2) . ? 
O3 C25 1.467(13) . ? 
O4 C26 1.474(14) . ? 
C20 C21 1.49(2) . ? 
C20 H20 0.9300 . ? 
C21 C22 1.608(14) . ? 
C21 H21A 0.9700 . ? 
C21 H21B 0.9700 . ? 
C22 C23 1.581(14) . ? 
C22 H22A 0.9700 . ? 
C22 H22B 0.9700 . ? 
C23 C24 1.525(15) . ? 
C23 H23A 0.9700 . ? 
C23 H23B 0.9700 . ? 
C24 H24A 0.9700 . ? 
C24 H24B 0.9700 . ? 
O3' C25' 1.40(3) . ? 
O4' C26' 1.52(3) . ? 
C20' C21' 1.62(3) . ? 
C20' H20' 0.9300 . ? 
C21' C22' 1.507(16) . ? 
C21' H21C 0.9700 . ? 
C21' H21D 0.9700 . ? 
C22' C23' 1.520(16) . ? 
C22' H22C 0.9700 . ? 
C22' H22D 0.9700 . ? 
C23' C24' 1.533(17) . ? 
C23' H23C 0.9700 . ? 
C23' H23D 0.9700 . ? 
C24' H24C 0.9700 . ? 
C24' H24D 0.9700 . ? 
C25 C26 1.452(14) . ? 
C25 C30 1.530(19) . ? 
C25 C29 1.55(2) . ? 
C26 C28 1.54(2) . ? 
C26 C27 1.55(2) . ? 
C27 H27A 0.9600 . ? 
C27 H27B 0.9600 . ? 
C27 H27C 0.9600 . ? 
C28 H28A 0.9600 . ? 
C28 H28B 0.9600 . ? 
C28 H28C 0.9600 . ? 
C29 H29A 0.9600 . ? 
C29 H29B 0.9600 . ? 
C29 H29C 0.9600 . ? 
C30 H30A 0.9600 . ? 
C30 H30B 0.9600 . ? 
C30 H30C 0.9600 . ? 
C25' C26' 1.512(19) . ? 
C25' C30' 1.52(4) . ? 
C25' C29' 1.74(4) . ? 
C26' C28' 1.40(4) . ? 
C26' C27' 1.63(5) . ? 
C27' H27D 0.9600 . ? 
C27' H27E 0.9600 . ? 
C27' H27F 0.9600 . ? 
C28' H28D 0.9600 . ? 
C28' H28E 0.9600 . ? 
C28' H28F 0.9600 . ? 
C29' H29D 0.9600 . ? 
C29' H29E 0.9600 . ? 
C29' H29F 0.9600 . ? 
C30' H30D 0.9600 . ? 
C30' H30E 0.9600 . ? 
C30' H30F 0.9600 . ? 
  
loop_ 
 _geom_angle_atom_site_label_1 
 _geom_angle_atom_site_label_2 
 _geom_angle_atom_site_label_3 
 _geom_angle 
 _geom_angle_site_symmetry_1 
 _geom_angle_site_symmetry_3 
 _geom_angle_publ_flag 
O5 Si1 C33 102.9(4) . . ? 
O5 Si1 C31 113.1(5) . . ? 
C33 Si1 C31 111.1(6) . . ? 
O5 Si1 C32 111.0(6) . . ? 
C33 Si1 C32 116.1(7) . . ? 
C31 Si1 C32 103.0(9) . . ? 
Si1 C31 H31A 109.5 . . ? 
Si1 C31 H31B 109.5 . . ? 
H31A C31 H31B 109.5 . . ? 
Si1 C31 H31C 109.5 . . ? 
H31A C31 H31C 109.5 . . ? 
H31B C31 H31C 109.5 . . ? 
Si1 C32 H32A 109.5 . . ? 
Si1 C32 H32B 109.5 . . ? 
H32A C32 H32B 109.5 . . ? 
Si1 C32 H32C 109.5 . . ? 
H32A C32 H32C 109.5 . . ? 
H32B C32 H32C 109.5 . . ? 
C34 C33 C35 102.5(12) . . ? 
C34 C33 C36 113.8(13) . . ? 
C35 C33 C36 109.2(13) . . ? 
C34 C33 Si1 111.2(9) . . ? 
C35 C33 Si1 110.8(10) . . ? 
C36 C33 Si1 109.2(9) . . ? 
C33 C34 H34A 109.5 . . ? 
C33 C34 H34B 109.5 . . ? 
H34A C34 H34B 109.5 . . ? 
C33 C34 H34C 109.5 . . ? 
H34A C34 H34C 109.5 . . ? 
H34B C34 H34C 109.5 . . ? 
C33 C35 H35A 109.5 . . ? 
C33 C35 H35B 109.5 . . ? 
H35A C35 H35B 109.5 . . ? 
C33 C35 H35C 109.5 . . ? 
H35A C35 H35C 109.5 . . ? 
H35B C35 H35C 109.5 . . ? 
C33 C36 H36A 109.5 . . ? 
C33 C36 H36B 109.5 . . ? 
H36A C36 H36B 109.5 . . ? 
C33 C36 H36C 109.5 . . ? 
H36A C36 H36C 109.5 . . ? 
H36B C36 H36C 109.5 . . ? 
O5 Si1' C33' 97.6(9) . . ? 
O5 Si1' C32' 118.5(10) . . ? 
C33' Si1' C32' 113.4(14) . . ? 
O5 Si1' C31' 117.5(9) . . ? 
C33' Si1' C31' 103.2(11) . . ? 
C32' Si1' C31' 105.5(14) . . ? 
Si1' C31' H31D 109.5 . . ? 
Si1' C31' H31E 109.5 . . ? 
H31D C31' H31E 109.5 . . ? 
Si1' C31' H31F 109.5 . . ? 
H31D C31' H31F 109.5 . . ? 
H31E C31' H31F 109.5 . . ? 
Si1' C32' H32D 109.5 . . ? 
Si1' C32' H32E 109.5 . . ? 
H32D C32' H32E 109.5 . . ? 
Si1' C32' H32F 109.5 . . ? 
H32D C32' H32F 109.5 . . ? 
H32E C32' H32F 109.5 . . ? 
C35' C33' C34' 107(3) . . ? 
C35' C33' C36' 103(2) . . ? 
C34' C33' C36' 116(3) . . ? 
C35' C33' Si1' 112.1(17) . . ? 
C34' C33' Si1' 104(2) . . ? 
C36' C33' Si1' 115.1(16) . . ? 
C33' C34' H34D 109.4 . . ? 
C33' C34' H34E 109.5 . . ? 
H34D C34' H34E 109.5 . . ? 
C33' C34' H34F 109.5 . . ? 
H34D C34' H34F 109.5 . . ? 
H34E C34' H34F 109.5 . . ? 
C33' C35' H35D 109.5 . . ? 
C33' C35' H35E 109.5 . . ? 
H35D C35' H35E 109.5 . . ? 
C33' C35' H35F 109.5 . . ? 
H35D C35' H35F 109.5 . . ? 
H35E C35' H35F 109.5 . . ? 
C33' C36' H36D 109.5 . . ? 
C33' C36' H36E 109.5 . . ? 
H36D C36' H36E 109.5 . . ? 
C33' C36' H36F 109.5 . . ? 
H36D C36' H36F 109.5 . . ? 
H36E C36' H36F 109.5 . . ? 
C11 N1 C10 126.3(4) . . ? 
C11 N1 H1 113(3) . . ? 
C10 N1 H1 117(3) . . ? 
C11 O2 C12 115.8(4) . . ? 
C7 O5 Si1' 174.2(5) . . ? 
C7 O5 Si1 121.3(3) . . ? 
O4' B1 O3' 111.0(8) . . ? 
O3 B1 O4 107.9(5) . . ? 
O4' B1 C8 127.6(7) . . ? 
O3' B1 C8 121.0(6) . . ? 
O3 B1 C8 130.0(6) . . ? 
O4 B1 C8 122.0(5) . . ? 
C10 C1 C6 118.9(4) . . ? 
C10 C1 C2 123.0(4) . . ? 
C6 C1 C2 118.2(4) . . ? 
C3 C2 C1 120.8(5) . . ? 
C3 C2 H2 119.6 . . ? 
C1 C2 H2 119.6 . . ? 
C2 C3 C4 120.4(5) . . ? 
C2 C3 H3 119.8 . . ? 
C4 C3 H3 119.8 . . ? 
C5 C4 C3 121.1(5) . . ? 
C5 C4 H4 119.5 . . ? 
C3 C4 H4 119.5 . . ? 
C4 C5 C6 120.0(5) . . ? 
C4 C5 H5 120.0 . . ? 
C6 C5 H5 120.0 . . ? 
C1 C6 C5 119.4(4) . . ? 
C1 C6 C7 119.1(4) . . ? 
C5 C6 C7 121.5(5) . . ? 
O5 C7 C8 121.4(4) . . ? 
O5 C7 C6 117.5(4) . . ? 
C8 C7 C6 121.1(4) . . ? 
C7 C8 C9 118.7(4) . . ? 
C7 C8 B1 121.2(4) . . ? 
C9 C8 B1 119.8(4) . . ? 
C10 C9 C8 120.4(4) . . ? 
C10 C9 C19 119.5(4) . . ? 
C8 C9 C19 120.1(4) . . ? 
C9 C10 C1 121.5(4) . . ? 
C9 C10 N1 119.0(4) . . ? 
C1 C10 N1 119.4(4) . . ? 
O1 C11 N1 125.3(4) . . ? 
O1 C11 O2 122.9(4) . . ? 
N1 C11 O2 111.8(4) . . ? 
O2 C12 C13 112.2(4) . . ? 
O2 C12 H12A 109.2 . . ? 
C13 C12 H12A 109.2 . . ? 
O2 C12 H12B 109.2 . . ? 
C13 C12 H12B 109.2 . . ? 
H12A C12 H12B 107.9 . . ? 
C14 C13 C18 117.5(7) . . ? 
C14 C13 C12 122.0(6) . . ? 
C18 C13 C12 120.5(6) . . ? 
C13 C14 C15 120.4(9) . . ? 
C13 C14 H14 119.8 . . ? 
C15 C14 H14 119.8 . . ? 
C16 C15 C14 120.7(11) . . ? 
C16 C15 H15 119.6 . . ? 
C14 C15 H15 119.6 . . ? 
C17 C16 C15 120.5(13) . . ? 
C17 C16 H16 119.8 . . ? 
C15 C16 H16 119.8 . . ? 
C16 C17 C18 119.9(10) . . ? 
C16 C17 H17 120.1 . . ? 
C18 C17 H17 120.1 . . ? 
C13 C18 C17 121.1(8) . . ? 
C13 C18 H18 119.5 . . ? 
C17 C18 H18 119.5 . . ? 
C20' C19 C24' 121.1(19) . . ? 
C20 C19 C24 121.6(12) . . ? 
C20' C19 C9 122.6(15) . . ? 
C20 C19 C9 116.7(10) . . ? 
C24' C19 C9 116.3(11) . . ? 
C24 C19 C9 121.6(8) . . ? 
B1 O3 C25 109.3(8) . . ? 
B1 O4 C26 106.8(8) . . ? 
C19 C20 C21 123.0(17) . . ? 
C19 C20 H20 118.5 . . ? 
C21 C20 H20 118.5 . . ? 
C20 C21 C22 106.9(11) . . ? 
C20 C21 H21A 110.3 . . ? 
C22 C21 H21A 110.3 . . ? 
C20 C21 H21B 110.3 . . ? 
C22 C21 H21B 110.3 . . ? 
H21A C21 H21B 108.6 . . ? 
C23 C22 C21 104.7(11) . . ? 
C23 C22 H22A 110.8 . . ? 
C21 C22 H22A 110.8 . . ? 
C23 C22 H22B 110.8 . . ? 
C21 C22 H22B 110.8 . . ? 
H22A C22 H22B 108.9 . . ? 
C24 C23 C22 104.3(12) . . ? 
C24 C23 H23A 110.9 . . ? 
C22 C23 H23A 110.9 . . ? 
C24 C23 H23B 110.9 . . ? 
C22 C23 H23B 110.9 . . ? 
H23A C23 H23B 108.9 . . ? 
C19 C24 C23 116.7(15) . . ? 
C19 C24 H24A 108.1 . . ? 
C23 C24 H24A 108.1 . . ? 
C19 C24 H24B 108.1 . . ? 
C23 C24 H24B 108.1 . . ? 
H24A C24 H24B 107.3 . . ? 
B1 O3' C25' 108.6(17) . . ? 
B1 O4' C26' 112.4(16) . . ? 
C19 C20' C21' 118(3) . . ? 
C19 C20' H20' 120.9 . . ? 
C21' C20' H20' 120.9 . . ? 
C22' C21' C20' 107.8(18) . . ? 
C22' C21' H21C 110.1 . . ? 
C20' C21' H21C 110.1 . . ? 
C22' C21' H21D 110.2 . . ? 
C20' C21' H21D 110.2 . . ? 
H21C C21' H21D 108.5 . . ? 
C23' C22' C21' 109.5(18) . . ? 
C23' C22' H22C 109.8 . . ? 
C21' C22' H22C 109.8 . . ? 
C23' C22' H22D 109.8 . . ? 
C21' C22' H22D 109.8 . . ? 
H22C C22' H22D 108.2 . . ? 
C22' C23' C24' 107(2) . . ? 
C22' C23' H23C 110.4 . . ? 
C24' C23' H23C 110.4 . . ? 
C22' C23' H23D 110.4 . . ? 
C24' C23' H23D 110.4 . . ? 
H23C C23' H23D 108.6 . . ? 
C19 C24' C23' 122(2) . . ? 
C19 C24' H24C 106.9 . . ? 
C23' C24' H24C 106.9 . . ? 
C19 C24' H24D 106.9 . . ? 
C23' C24' H24D 106.9 . . ? 
H24C C24' H24D 106.7 . . ? 
C26 C25 O3 101.9(9) . . ? 
C26 C25 C30 114.9(13) . . ? 
O3 C25 C30 107.6(11) . . ? 
C26 C25 C29 116.8(17) . . ? 
O3 C25 C29 106.1(10) . . ? 
C30 C25 C29 108.6(12) . . ? 
C25 C26 O4 102.2(10) . . ? 
C25 C26 C28 115.1(15) . . ? 
O4 C26 C28 106.6(12) . . ? 
C25 C26 C27 115.9(17) . . ? 
O4 C26 C27 104.9(11) . . ? 
C28 C26 C27 110.8(13) . . ? 
C26 C27 H27A 109.5 . . ? 
C26 C27 H27B 109.5 . . ? 
H27A C27 H27B 109.5 . . ? 
C26 C27 H27C 109.4 . . ? 
H27A C27 H27C 109.5 . . ? 
H27B C27 H27C 109.5 . . ? 
C26 C28 H28A 109.5 . . ? 
C26 C28 H28B 109.5 . . ? 
H28A C28 H28B 109.5 . . ? 
C26 C28 H28C 109.5 . . ? 
H28A C28 H28C 109.5 . . ? 
H28B C28 H28C 109.5 . . ? 
C25 C29 H29A 109.5 . . ? 
C25 C29 H29B 109.5 . . ? 
H29A C29 H29B 109.5 . . ? 
C25 C29 H29C 109.5 . . ? 
H29A C29 H29C 109.5 . . ? 
H29B C29 H29C 109.5 . . ? 
C25 C30 H30A 109.5 . . ? 
C25 C30 H30B 109.5 . . ? 
H30A C30 H30B 109.5 . . ? 
C25 C30 H30C 109.5 . . ? 
H30A C30 H30C 109.5 . . ? 
H30B C30 H30C 109.5 . . ? 
O3' C25' C26' 107(3) . . ? 
O3' C25' C30' 112(3) . . ? 
C26' C25' C30' 117(3) . . ? 
O3' C25' C29' 122(3) . . ? 
C26' C25' C29' 93(3) . . ? 
C30' C25' C29' 105(2) . . ? 
C28' C26' C25' 129(4) . . ? 
C28' C26' O4' 110(3) . . ? 
C25' C26' O4' 96(2) . . ? 
C28' C26' C27' 107(3) . . ? 
C25' C26' C27' 113(4) . . ? 
O4' C26' C27' 96(2) . . ? 
C26' C27' H27D 109.5 . . ? 
C26' C27' H27E 109.5 . . ? 
H27D C27' H27E 109.5 . . ? 
C26' C27' H27F 109.5 . . ? 
H27D C27' H27F 109.5 . . ? 
H27E C27' H27F 109.5 . . ? 
C26' C28' H28D 109.5 . . ? 
C26' C28' H28E 109.5 . . ? 
H28D C28' H28E 109.5 . . ? 
C26' C28' H28F 109.5 . . ? 
H28D C28' H28F 109.5 . . ? 
H28E C28' H28F 109.5 . . ? 
C25' C29' H29D 109.5 . . ? 
C25' C29' H29E 109.5 . . ? 
H29D C29' H29E 109.5 . . ? 
C25' C29' H29F 109.5 . . ? 
H29D C29' H29F 109.5 . . ? 
H29E C29' H29F 109.5 . . ? 
C25' C30' H30D 109.5 . . ? 
C25' C30' H30E 109.5 . . ? 
H30D C30' H30E 109.5 . . ? 
C25' C30' H30F 109.4 . . ? 
H30D C30' H30F 109.5 . . ? 
H30E C30' H30F 109.5 . . ? 
  
loop_ 
 _geom_torsion_atom_site_label_1 
 _geom_torsion_atom_site_label_2 
 _geom_torsion_atom_site_label_3 
 _geom_torsion_atom_site_label_4 
 _geom_torsion 
 _geom_torsion_site_symmetry_1 
 _geom_torsion_site_symmetry_2 
 _geom_torsion_site_symmetry_3 
 _geom_torsion_site_symmetry_4 
 _geom_torsion_publ_flag 
O5 Si1 C33 C34 -69.7(9) . . . . ? 
C31 Si1 C33 C34 51.6(11) . . . . ? 
C32 Si1 C33 C34 168.9(11) . . . . ? 
O5 Si1 C33 C35 177.0(11) . . . . ? 
C31 Si1 C33 C35 -61.7(13) . . . . ? 
C32 Si1 C33 C35 55.6(14) . . . . ? 
O5 Si1 C33 C36 56.7(10) . . . . ? 
C31 Si1 C33 C36 178.1(11) . . . . ? 
C32 Si1 C33 C36 -64.7(13) . . . . ? 
O5 Si1' C33' C35' -174.0(18) . . . . ? 
C32' Si1' C33' C35' -48(2) . . . . ? 
C31' Si1' C33' C35' 65(2) . . . . ? 
O5 Si1' C33' C34' -59(2) . . . . ? 
C32' Si1' C33' C34' 67(3) . . . . ? 
C31' Si1' C33' C34' -180(2) . . . . ? 
O5 Si1' C33' C36' 68.2(17) . . . . ? 
C32' Si1' C33' C36' -166.1(17) . . . . ? 
C31' Si1' C33' C36' -53(2) . . . . ? 
C33' Si1' O5 Si1 4.9(7) . . . . ? 
C32' Si1' O5 Si1 -117.1(15) . . . . ? 
C31' Si1' O5 Si1 114.2(10) . . . . ? 
C33 Si1 O5 C7 174.0(4) . . . . ? 
C31 Si1 O5 C7 54.1(6) . . . . ? 
C32 Si1 O5 C7 -61.2(8) . . . . ? 
C33 Si1 O5 Si1' -4.4(4) . . . . ? 
C31 Si1 O5 Si1' -124.4(6) . . . . ? 
C32 Si1 O5 Si1' 120.4(8) . . . . ? 
C10 C1 C2 C3 176.4(4) . . . . ? 
C6 C1 C2 C3 -3.8(7) . . . . ? 
C1 C2 C3 C4 0.3(8) . . . . ? 
C2 C3 C4 C5 2.2(9) . . . . ? 
C3 C4 C5 C6 -1.0(8) . . . . ? 
C10 C1 C6 C5 -175.3(4) . . . . ? 
C2 C1 C6 C5 4.9(6) . . . . ? 
C10 C1 C6 C7 3.5(6) . . . . ? 
C2 C1 C6 C7 -176.4(4) . . . . ? 
C4 C5 C6 C1 -2.6(7) . . . . ? 
C4 C5 C6 C7 178.7(5) . . . . ? 
Si1 O5 C7 C8 93.8(5) . . . . ? 
Si1 O5 C7 C6 -88.7(4) . . . . ? 
C1 C6 C7 O5 174.9(4) . . . . ? 
C5 C6 C7 O5 -6.3(7) . . . . ? 
C1 C6 C7 C8 -7.5(7) . . . . ? 
C5 C6 C7 C8 171.2(4) . . . . ? 
O5 C7 C8 C9 -175.9(4) . . . . ? 
C6 C7 C8 C9 6.7(6) . . . . ? 
O5 C7 C8 B1 11.1(7) . . . . ? 
C6 C7 C8 B1 -166.4(4) . . . . ? 
O4' B1 C8 C7 -149.4(9) . . . . ? 
O3' B1 C8 C7 22.6(10) . . . . ? 
O3 B1 C8 C7 -55.4(9) . . . . ? 
O4 B1 C8 C7 128.7(6) . . . . ? 
O4' B1 C8 C9 37.6(11) . . . . ? 
O3' B1 C8 C9 -150.4(8) . . . . ? 
O3 B1 C8 C9 131.6(7) . . . . ? 
O4 B1 C8 C9 -44.2(7) . . . . ? 
C7 C8 C9 C10 -1.9(6) . . . . ? 
B1 C8 C9 C10 171.2(4) . . . . ? 
C7 C8 C9 C19 177.3(4) . . . . ? 
B1 C8 C9 C19 -9.5(6) . . . . ? 
C8 C9 C10 C1 -2.0(6) . . . . ? 
C19 C9 C10 C1 178.7(4) . . . . ? 
C8 C9 C10 N1 174.8(4) . . . . ? 
C19 C9 C10 N1 -4.4(6) . . . . ? 
C6 C1 C10 C9 1.2(6) . . . . ? 
C2 C1 C10 C9 -179.0(4) . . . . ? 
C6 C1 C10 N1 -175.7(4) . . . . ? 
C2 C1 C10 N1 4.1(6) . . . . ? 
C11 N1 C10 C9 106.3(5) . . . . ? 
C11 N1 C10 C1 -76.7(5) . . . . ? 
C10 N1 C11 O1 -176.9(4) . . . . ? 
C10 N1 C11 O2 2.6(6) . . . . ? 
C12 O2 C11 O1 -6.6(6) . . . . ? 
C12 O2 C11 N1 173.9(4) . . . . ? 
C11 O2 C12 C13 -85.4(5) . . . . ? 
O2 C12 C13 C14 133.4(6) . . . . ? 
O2 C12 C13 C18 -49.6(7) . . . . ? 
C18 C13 C14 C15 0.9(11) . . . . ? 
C12 C13 C14 C15 178.0(7) . . . . ? 
C13 C14 C15 C16 0.3(17) . . . . ? 
C14 C15 C16 C17 -1(2) . . . . ? 
C15 C16 C17 C18 0.8(17) . . . . ? 
C14 C13 C18 C17 -1.3(9) . . . . ? 
C12 C13 C18 C17 -178.4(6) . . . . ? 
C16 C17 C18 C13 0.4(12) . . . . ? 
C10 C9 C19 C20' 92.1(17) . . . . ? 
C8 C9 C19 C20' -87.2(17) . . . . ? 
C10 C9 C19 C20 103.5(10) . . . . ? 
C8 C9 C19 C20 -75.8(11) . . . . ? 
C10 C9 C19 C24' -86.4(18) . . . . ? 
C8 C9 C19 C24' 94.4(18) . . . . ? 
C10 C9 C19 C24 -80.2(12) . . . . ? 
C8 C9 C19 C24 100.5(12) . . . . ? 
O4' B1 O3 C25 -44.4(10) . . . . ? 
O3' B1 O3 C25 84.6(10) . . . . ? 
O4 B1 O3 C25 9.4(10) . . . . ? 
C8 B1 O3 C25 -166.9(8) . . . . ? 
O4' B1 O4 C26 69.2(10) . . . . ? 
O3' B1 O4 C26 -46.2(10) . . . . ? 
O3 B1 O4 C26 12.8(10) . . . . ? 
C8 B1 O4 C26 -170.5(8) . . . . ? 
C20' C19 C20 C21 -64(12) . . . . ? 
C24' C19 C20 C21 3(3) . . . . ? 
C24 C19 C20 C21 -4(2) . . . . ? 
C9 C19 C20 C21 172.4(12) . . . . ? 
C19 C20 C21 C22 28(2) . . . . ? 
C20 C21 C22 C23 -60.4(16) . . . . ? 
C21 C22 C23 C24 70.8(15) . . . . ? 
C20' C19 C24 C23 26(3) . . . . ? 
C20 C19 C24 C23 15(2) . . . . ? 
C24' C19 C24 C23 -114(18) . . . . ? 
C9 C19 C24 C23 -161.2(11) . . . . ? 
C22 C23 C24 C19 -48.6(19) . . . . ? 
O4' B1 O3' C25' -23(2) . . . . ? 
O3 B1 O3' C25' -74.0(18) . . . . ? 
O4 B1 O3' C25' 38.7(18) . . . . ? 
C8 B1 O3' C25' 164.0(17) . . . . ? 
O3' B1 O4' C26' 14(2) . . . . ? 
O3 B1 O4' C26' 61(2) . . . . ? 
O4 B1 O4' C26' -61(2) . . . . ? 
C8 B1 O4' C26' -173.6(19) . . . . ? 
C20 C19 C20' C21' 131(14) . . . . ? 
C24' C19 C20' C21' 11(3) . . . . ? 
C24 C19 C20' C21' 6(3) . . . . ? 
C9 C19 C20' C21' -167.2(15) . . . . ? 
C19 C20' C21' C22' -36(3) . . . . ? 
C20' C21' C22' C23' 62(3) . . . . ? 
C21' C22' C23' C24' -62(3) . . . . ? 
C20' C19 C24' C23' -13(4) . . . . ? 
C20 C19 C24' C23' -25(4) . . . . ? 
C24 C19 C24' C23' 30(14) . . . . ? 
C9 C19 C24' C23' 166(2) . . . . ? 
C22' C23' C24' C19 37(4) . . . . ? 
B1 O3 C25 C26 -27.7(15) . . . . ? 
B1 O3 C25 C30 -149.0(10) . . . . ? 
B1 O3 C25 C29 94.9(12) . . . . ? 
O3 C25 C26 O4 33.4(16) . . . . ? 
C30 C25 C26 O4 149.4(11) . . . . ? 
C29 C25 C26 O4 -81.7(13) . . . . ? 
O3 C25 C26 C28 148.5(12) . . . . ? 
C30 C25 C26 C28 -95.5(18) . . . . ? 
C29 C25 C26 C28 33.3(17) . . . . ? 
O3 C25 C26 C27 -80.0(13) . . . . ? 
C30 C25 C26 C27 36.0(16) . . . . ? 
C29 C25 C26 C27 164.8(12) . . . . ? 
B1 O4 C26 C25 -29.6(15) . . . . ? 
B1 O4 C26 C28 -150.7(11) . . . . ? 
B1 O4 C26 C27 91.8(13) . . . . ? 
B1 O3' C25' C26' 22(4) . . . . ? 
B1 O3' C25' C30' 152(2) . . . . ? 
B1 O3' C25' C29' -83(3) . . . . ? 
O3' C25' C26' C28' -136(3) . . . . ? 
C30' C25' C26' C28' 98(5) . . . . ? 
C29' C25' C26' C28' -11(5) . . . . ? 
O3' C25' C26' O4' -13(4) . . . . ? 
C30' C25' C26' O4' -139(2) . . . . ? 
C29' C25' C26' O4' 112(2) . . . . ? 
O3' C25' C26' C27' 86(3) . . . . ? 
C30' C25' C26' C27' -41(4) . . . . ? 
C29' C25' C26' C27' -149(2) . . . . ? 
B1 O4' C26' C28' 136(2) . . . . ? 
B1 O4' C26' C25' 0(3) . . . . ? 
B1 O4' C26' C27' -114(2) . . . . ? 
  
loop_ 
 _geom_hbond_atom_site_label_D 
 _geom_hbond_atom_site_label_H 
 _geom_hbond_atom_site_label_A 
 _geom_hbond_distance_DH 
 _geom_hbond_distance_HA 
 _geom_hbond_distance_DA 
 _geom_hbond_angle_DHA 
 _geom_hbond_site_symmetry_A 
N1 H1 O1  0.92(5) 2.01(5) 2.905(5) 162(5) 2_655 
N1 H1 O1  0.92(5) 2.01(5) 2.905(5) 162(5) 2_655 
N1 H1 O1  0.92(5) 2.01(5) 2.905(5) 162(5) 2_655 
N1 H1 O1  0.92(5) 2.01(5) 2.905(5) 162(5) 2_655 
N1 H1 O1  0.92(5) 2.01(5) 2.905(5) 162(5) 2_655 
N1 H1 O1  0.92(5) 2.01(5) 2.905(5) 162(5) 2_655 
N1 H1 O1  0.92(5) 2.01(5) 2.905(5) 162(5) 2_655 
N1 H1 O1  0.92(5) 2.01(5) 2.905(5) 162(5) 2_655 
  
_refine_diff_density_max    0.853 
_refine_diff_density_min   -0.314 
_refine_diff_density_rms    0.051 
  
_shelxl_version_number 2013-4 
  
_shelx_res_file 
; 
TITL cd16021 in P-1 
CELL 0.71073   7.2437  15.9556  15.9789  93.500  95.990 100.034 
ZERR    2.00   0.0012   0.0026   0.0026   0.004   0.004   0.004 
LATT 1 
SFAC C  H  B  N  O  Si 
UNIT 72 96 2 2 10 2 
OMIT    0   1   0 
OMIT     0   0   1 
OMIT    -2   2   0 
OMIT    -4   7   1 
OMIT  -3.00  50.00 
L.S. 10 
ACTA 
BOND  $H 
FMAP 2 
PLAN 20 
HTAB N1 O1_$1 
HTAB N1 O1_$1 
HTAB N1 O1_$1 
HTAB N1 O1_$1 
dfix 1.85 0.02 si1' c33' 
dfix 1.55 0.02 c33' c34' c33' c35' c33' c36' 
dfix 1.55 0.02 c33 c34 c33 c35 c33 c36 
simu 0.004 c25 > c30 
simu 0.004  c25' > c30' 
simu 0.004  o3 o4 o3' o4' 
simu 0.004 c20' > c24' 
simu 0.004 c19 > c24 
dfix 1.55 0.02 c21' c22' c22' c23' c23' c24' 
dfix 1.55 0.02 c21 c22 c22 c23 c23 c24 
dfix 1.55 0.02 c25 c26 c25' c26' 
isor 0.01 c31' > c36' 
isor 0.01 c31 > c36 
isor 0.01 si1 si1' 
size 0.18 0.14 0.08 
wpdb -1 
mpla 
htab 
conf 
EQIV $1 -x+1, -y, -z 
HTAB N1 O1_$1 
HTAB N1 O1_$1 
HTAB N1 O1_$1 
HTAB N1 O1_$1 
FREE C27' C28' 
WGHT    0.200000 
FVAR       0.24169 
PART 1 
MOLE 1 
SI1   6    1.276023    0.392912    0.253728    10.70000    0.05175    0.05887 = 
         0.11763   -0.00032   -0.00880    0.00742 
C31   1    1.331749    0.399696    0.144336    10.60000    0.06531    0.11693 = 
         0.10079   -0.02691    0.02600   -0.01030 
AFIX 137 
H31A  2    1.245387    0.356879    0.108027    10.60000   -1.50000 
H31B  2    1.458461    0.390544    0.141227    10.60000   -1.50000 
H31C  2    1.320475    0.455203    0.126676    10.60000   -1.50000 
AFIX   0 
C32   1    1.374414    0.298075    0.287088    10.60000    0.06478    0.07117 = 
         0.14577    0.03683    0.01474    0.03732 
AFIX 137 
H32A  2    1.387404    0.298916    0.347556    10.60000   -1.50000 
H32B  2    1.495821    0.299628    0.267592    10.60000   -1.50000 
H32C  2    1.290673    0.246855    0.263292    10.60000   -1.50000 
AFIX   0 
C33   1    1.369445    0.493932    0.317672    10.70000    0.10109    0.10072 = 
         0.11794    0.00712   -0.01167   -0.01285 
C34   1    1.309460    0.568547    0.275515    10.70000    0.19448    0.08561 = 
         0.19470    0.00102    0.02264    0.02158 
AFIX 137 
H34A  2    1.391353    0.620461    0.298811    10.70000   -1.50000 
H34B  2    1.181914    0.571445    0.284954    10.70000   -1.50000 
H34C  2    1.316951    0.561206    0.215962    10.70000   -1.50000 
AFIX   0 
C35   1    1.587681    0.515469    0.322191    10.60000    0.11738    0.15345 = 
         0.18275   -0.02518   -0.02528   -0.04153 
AFIX 137 
H35A  2    1.622615    0.529754    0.267791    10.60000   -1.50000 
H35B  2    1.640198    0.466885    0.338651    10.60000   -1.50000 
H35C  2    1.635290    0.563098    0.362929    10.60000   -1.50000 
AFIX   0 
C36   1    1.313219    0.486149    0.408070    10.60000    0.14799    0.17651 = 
         0.07766   -0.03965   -0.00393    0.00361 
AFIX 137 
H36A  2    1.382533    0.533769    0.444583    10.60000   -1.50000 
H36B  2    1.341860    0.433999    0.428540    10.60000   -1.50000 
H36C  2    1.180382    0.485850    0.407166    10.60000   -1.50000 
PART 2 
AFIX   0 
SI1'  6    1.186785    0.449167    0.306895    10.30000    0.10402    0.10779 = 
         0.09825   -0.00561    0.00785   -0.00015 
C31'  1    1.182600    0.559964    0.279150    10.40000    0.13196    0.07582 = 
         0.11681   -0.00478    0.01945    0.01206 
AFIX 137 
H31D  2    1.174137    0.561626    0.218935    10.40000   -1.50000 
H31E  2    1.296181    0.596788    0.304770    10.40000   -1.50000 
H31F  2    1.075315    0.578873    0.299371    10.40000   -1.50000 
AFIX   0 
C32'  1    1.227998    0.455938    0.423653    10.40000    0.16102    0.16673 = 
         0.12418   -0.01014    0.00234   -0.00791 
AFIX 137 
H32D  2    1.109222    0.450736    0.446281    10.40000   -1.50000 
H32E  2    1.305237    0.509959    0.444021    10.40000   -1.50000 
H32F  2    1.290901    0.410628    0.441182    10.40000   -1.50000 
AFIX   0 
C33'  1    1.386125    0.420917    0.255330    10.30000    0.10079    0.13292 = 
         0.09859    0.00145    0.01690    0.01880 
C34'  1    1.391378    0.325290    0.278362    10.30000    0.12062    0.09367 = 
         0.16850    0.03618    0.03887    0.03051 
AFIX 137 
H34D  2    1.309368    0.286106    0.236843    10.30000   -1.50000 
H34E  2    1.349925    0.317556    0.332967    10.30000   -1.50000 
H34F  2    1.517999    0.314728    0.279121    10.30000   -1.50000 
AFIX   0 
C35'  1    1.583246    0.477463    0.295117    10.40000    0.14478    0.15917 = 
         0.15260   -0.01144    0.01210    0.00223 
AFIX 137 
H35D  2    1.684506    0.455158    0.272823    10.40000   -1.50000 
H35E  2    1.595969    0.475854    0.355376    10.40000   -1.50000 
H35F  2    1.587800    0.535380    0.281078    10.40000   -1.50000 
AFIX   0 
C36'  1    1.378881    0.435851    0.156584    10.40000    0.13087    0.11984 = 
         0.09757    0.01714    0.00007    0.01904 
AFIX 137 
H36D  2    1.500060    0.464868    0.145029    10.40000   -1.50000 
H36E  2    1.285241    0.469889    0.141778    10.40000   -1.50000 
H36F  2    1.347016    0.381717    0.123954    10.40000   -1.50000 
PART 0 
AFIX   0 
N1    4    0.561929    0.111506    0.061858    11.00000    0.04449    0.06249 = 
         0.06956    0.00241    0.00416    0.01777 
O1    5    0.285124    0.035755   -0.004752    11.00000    0.06082    0.07059 = 
         0.10097   -0.01848   -0.00820    0.01254 
O2    5    0.295290    0.162807    0.068149    11.00000    0.05044    0.07514 = 
         0.08641   -0.00860    0.00639    0.02115 
O5    5    1.033698    0.378915    0.261935    11.00000    0.08941    0.06041 = 
         0.09576    0.00543   -0.03032   -0.00170 
B1    3    0.902557    0.226657    0.344108    11.00000    0.07515    0.06588 = 
         0.05780    0.01032   -0.00241    0.02090 
C1    1    0.715137    0.262138    0.082358    11.00000    0.04244    0.06959 = 
         0.05918    0.01185    0.00557    0.01342 
C2    1    0.648560    0.277924   -0.001406    11.00000    0.05460    0.09363 = 
         0.07094    0.02611   -0.00093    0.01401 
AFIX  43 
H2    2    0.577429    0.233357   -0.037559    11.00000   -1.20000 
AFIX   0 
C3    1    0.687780    0.357244   -0.029008    11.00000    0.07075    0.11551 = 
         0.07984    0.04861    0.00208    0.00652 
AFIX  43 
H3    2    0.642931    0.366548   -0.083708    11.00000   -1.20000 
AFIX   0 
C4    1    0.794360    0.424473    0.023920    11.00000    0.06888    0.09568 = 
         0.11120    0.05870   -0.00337    0.00308 
AFIX  43 
H4    2    0.816418    0.478824    0.004822    11.00000   -1.20000 
AFIX   0 
C5    1    0.867386    0.412136    0.103588    11.00000    0.05453    0.07395 = 
         0.11056    0.03348   -0.00576    0.00224 
AFIX  43 
H5    2    0.940185    0.457683    0.137942    11.00000   -1.20000 
AFIX   0 
C6    1    0.832122    0.329826    0.133884    11.00000    0.04489    0.07189 = 
         0.06703    0.02219    0.00533    0.01223 
C7    1    0.909745    0.314052    0.216565    11.00000    0.05463    0.06325 = 
         0.07132    0.00623   -0.00337    0.01347 
C8    1    0.854952    0.237268    0.249803    11.00000    0.04716    0.05938 = 
         0.06747    0.00993    0.00036    0.01432 
C9    1    0.733921    0.169580    0.196939    11.00000    0.04470    0.05475 = 
         0.06848    0.00955    0.00649    0.01429 
C10   1    0.669681    0.182319    0.115409    11.00000    0.03909    0.06009 = 
         0.06062    0.00439    0.00497    0.01355 
C11   1    0.375349    0.098064    0.038061    11.00000    0.04706    0.07185 = 
         0.06684    0.00539    0.00435    0.01652 
C12   1    0.100077    0.158326    0.038956    11.00000    0.04242    0.08569 = 
         0.10710   -0.00189    0.00664    0.01554 
AFIX  23 
H12A  2    0.042137    0.188388    0.080711    11.00000   -1.20000 
H12B  2    0.037090    0.099064    0.032888    11.00000   -1.20000 
AFIX   0 
C13   1    0.072255    0.196813   -0.044822    11.00000    0.04990    0.09216 = 
         0.09796   -0.00322    0.00531    0.02190 
C14   1   -0.052729    0.157120   -0.108818    11.00000    0.10038    0.16299 = 
         0.11102   -0.01155   -0.01608    0.01102 
AFIX  43 
H14   2   -0.122599    0.103513   -0.103028    11.00000   -1.20000 
AFIX   0 
C15   1   -0.078910    0.196120   -0.184821    11.00000    0.16868    0.25634 = 
         0.10242   -0.01112   -0.03489    0.02143 
AFIX  43 
H15   2   -0.166429    0.168076   -0.228757    11.00000   -1.20000 
AFIX   0 
C16   1    0.020086    0.272573   -0.194457    11.00000    0.13811    0.26254 = 
         0.12615    0.03895   -0.00289    0.07391 
AFIX  43 
H16   2    0.002893    0.297078   -0.245371    11.00000   -1.20000 
AFIX   0 
C17   1    0.140892    0.313377   -0.133158    11.00000    0.12161    0.15891 = 
         0.16529    0.06940    0.02368    0.05461 
AFIX  43 
H17   2    0.208572    0.367150   -0.140060    11.00000   -1.20000 
AFIX   0 
C18   1    0.169029    0.275863   -0.056148    11.00000    0.10166    0.11125 = 
         0.12673    0.01928   -0.00564    0.02043 
AFIX  43 
H18   2    0.254908    0.305521   -0.012449    11.00000   -1.20000 
AFIX   0 
C19   1    0.679026    0.085052    0.229462    11.00000    0.07678    0.06384 = 
         0.07238    0.01686    0.01552    0.01638 
PART 1 
O3    5    1.071097    0.241561    0.392496    10.60000    0.08977    0.16936 = 
         0.06376    0.03342   -0.01048    0.01649 
O4    5    0.764487    0.192369    0.394192    10.60000    0.09650    0.16733 = 
         0.05605    0.03071   -0.00074    0.01570 
C20   1    0.814880    0.033414    0.234947    10.50000    0.08298    0.06460 = 
         0.08055    0.02077    0.01096    0.02531 
AFIX  43 
H20   2    0.926846    0.050857    0.212045    10.50000   -1.20000 
AFIX   0 
C21   1    0.789633   -0.048510    0.275755    10.50000    0.09688    0.07060 = 
         0.09171    0.02050    0.00520    0.01930 
AFIX  23 
H21A  2    0.840907   -0.039061    0.334804    10.50000   -1.20000 
H21B  2    0.854155   -0.088790    0.248029    10.50000   -1.20000 
AFIX   0 
C22   1    0.566451   -0.084917    0.266884    10.50000    0.10031    0.07507 = 
         0.09286    0.02383    0.01331    0.00692 
AFIX  23 
H22A  2    0.513792   -0.093653    0.207995    10.50000   -1.20000 
H22B  2    0.540739   -0.138651    0.292533    10.50000   -1.20000 
AFIX   0 
C23   1    0.481204   -0.013785    0.315054    10.50000    0.09073    0.07449 = 
         0.08820    0.02696    0.01390    0.00181 
AFIX  23 
H23A  2    0.349915   -0.034177    0.321954    10.50000   -1.20000 
H23B  2    0.551573    0.003464    0.370243    10.50000   -1.20000 
AFIX   0 
C24   1    0.500124    0.060051    0.258429    10.50000    0.07931    0.06783 = 
         0.07915    0.02292    0.01551    0.00759 
AFIX  23 
H24A  2    0.406355    0.044636    0.209486    10.50000   -1.20000 
H24B  2    0.469520    0.109267    0.289004    10.50000   -1.20000 
PART 2 
AFIX   0 
O3'   5    0.938753    0.292692    0.399757    10.40000    0.11017    0.16912 = 
         0.06751    0.02849   -0.00576    0.01634 
O4'   5    0.931894    0.160188    0.377562    10.40000    0.10804    0.16758 = 
         0.06889    0.02754   -0.00919    0.01966 
C20'  1    0.785620    0.022708    0.224816    10.50000    0.19066    0.10123 = 
         0.15464    0.04498    0.04061    0.03895 
AFIX  43 
H20'  2    0.908612    0.034850    0.211119    10.50000   -1.20000 
AFIX   0 
C21'  1    0.691806   -0.073288    0.243865    10.50000    0.19458    0.10570 = 
         0.15688    0.04279    0.03907    0.03376 
AFIX  23 
H21C  2    0.618954   -0.103405    0.193152    10.50000   -1.20000 
H21D  2    0.789692   -0.104800    0.262278    10.50000   -1.20000 
AFIX   0 
C22'  1    0.565524   -0.065819    0.312147    10.50000    0.19690    0.11002 = 
         0.15358    0.04636    0.03839    0.02713 
AFIX  23 
H22C  2    0.511071   -0.122292    0.326553    10.50000   -1.20000 
H22D  2    0.638777   -0.034900    0.362386    10.50000   -1.20000 
AFIX   0 
C23'  1    0.409197   -0.018884    0.281313    10.50000    0.19520    0.11276 = 
         0.15106    0.04995    0.03663    0.02291 
AFIX  23 
H23C  2    0.323925   -0.015603    0.323854    10.50000   -1.20000 
H23D  2    0.337503   -0.048385    0.230062    10.50000   -1.20000 
AFIX   0 
C24'  1    0.505447    0.070872    0.264304    10.50000    0.19290    0.11196 = 
         0.14885    0.05041    0.03778    0.02033 
AFIX  23 
H24C  2    0.415480    0.093827    0.227115    10.50000   -1.20000 
H24D  2    0.524351    0.105575    0.317547    10.50000   -1.20000 
PART 1 
AFIX   0 
C25   1    1.049747    0.203421    0.472944    10.60000    0.13824    0.16444 = 
         0.05651    0.03976   -0.00220    0.05158 
C26   1    0.853326    0.205486    0.482407    10.60000    0.13967    0.17141 = 
         0.05770    0.03441    0.01079    0.04669 
C27   1    0.810681    0.292277    0.515940    10.60000    0.16358    0.18971 = 
         0.09374    0.01200    0.02134    0.04274 
AFIX 137 
H27A  2    0.912989    0.337074    0.508088    10.60000   -1.50000 
H27B  2    0.796438    0.291234    0.574949    10.60000   -1.50000 
H27C  2    0.696152    0.302382    0.485592    10.60000   -1.50000 
AFIX   0 
C28   1    0.753448    0.132086    0.529227    10.50000    0.14704    0.18037 = 
         0.07216    0.04683    0.03200    0.02529 
AFIX 137 
H28A  2    0.619709    0.130743    0.521633    10.50000   -1.50000 
H28B  2    0.798597    0.141056    0.588314    10.50000   -1.50000 
H28C  2    0.779877    0.078779    0.506872    10.50000   -1.50000 
AFIX   0 
C29   1    1.104619    0.113946    0.461836    10.50000    0.14906    0.15250 = 
         0.07366    0.03901   -0.01083    0.06808 
AFIX 137 
H29A  2    0.997841    0.073728    0.434653    10.50000   -1.50000 
H29B  2    1.143098    0.095985    0.516182    10.50000   -1.50000 
H29C  2    1.206859    0.116784    0.427805    10.50000   -1.50000 
AFIX   0 
C30   1    1.192657    0.258318    0.540511    10.60000    0.14232    0.18862 = 
         0.07823    0.02441   -0.02802    0.02974 
AFIX 137 
H30A  2    1.317230    0.248428    0.533292    10.60000   -1.50000 
H30B  2    1.162651    0.243458    0.595457    10.60000   -1.50000 
H30C  2    1.187779    0.317521    0.535188    10.60000   -1.50000 
PART 2 
AFIX   0 
C25'  1    0.925730    0.263625    0.479932    10.40000    0.22051    0.20787 = 
         0.11921    0.03061    0.03733    0.02448 
C26'  1    0.953300    0.171784    0.473714    10.40000    0.22005    0.20622 = 
         0.11924    0.03655    0.03270    0.02723 
C27'  1    1.175140    0.162923    0.486775    10.40000    0.21752    0.21080 = 
         0.12630    0.03727    0.02523    0.03039 
AFIX 137 
H27D  2    1.209022    0.138743    0.435315    10.40000   -1.50000 
H27E  2    1.195214    0.126475    0.531201    10.40000   -1.50000 
H27F  2    1.251797    0.218334    0.501498    10.40000   -1.50000 
AFIX   0 
C28'  1    0.851253    0.101170    0.506498    10.50000    0.22581    0.20031 = 
         0.12643    0.04890    0.02416    0.03136 
AFIX 137 
H28D  2    0.880537    0.105500    0.566776    10.50000   -1.50000 
H28E  2    0.884555    0.049822    0.482912    10.50000   -1.50000 
H28F  2    0.718565    0.099678    0.492327    10.50000   -1.50000 
AFIX   0 
C29'  1    0.710060    0.239042    0.520551    10.50000    0.22314    0.21866 = 
         0.13714    0.02107    0.04752    0.02201 
AFIX 137 
H29D  2    0.620403    0.202707    0.479501    10.50000   -1.50000 
H29E  2    0.664337    0.290743    0.533492    10.50000   -1.50000 
H29F  2    0.726787    0.210153    0.571007    10.50000   -1.50000 
AFIX   0 
C30'  1    1.051807    0.324494    0.548271    10.40000    0.22993    0.21113 = 
         0.12395    0.02315    0.03351    0.01032 
AFIX 137 
H30D  2    1.176495    0.338431    0.531772    10.40000   -1.50000 
H30E  2    1.057530    0.297652    0.600403    10.40000   -1.50000 
H30F  2    1.000808    0.375739    0.555683    10.40000   -1.50000 
PART 0 
AFIX   0 
H1    2    0.613611    0.062782    0.056203    11.00000    0.09272 
HKLF 4 
  
REM  cd16021 in P-1 
REM R1 =  0.1021 for    2958 Fo > 4sig(Fo)  and  0.1802 for all    6332 data 
REM    599 parameters refined using    243 restraints 
  
END 
  
WGHT      0.1763      0.3072 
  
REM Instructions for potential hydrogen bonds 
HTAB N1 O1_$1 
  
REM Highest difference peak  0.853,  deepest hole -0.314,  1-sigma level  0.051 
Q1    1   1.2595  0.3897  0.3210  11.00000  0.05    0.85 
Q2    1   0.7946  0.2692  0.3971  11.00000  0.05    0.50 
Q3    1   1.3931  0.4838  0.2445  11.00000  0.05    0.31 
Q4    1   1.0487  0.1784  0.3825  11.00000  0.05    0.27 
Q5    1   0.9329  0.3929  0.2906  11.00000  0.05    0.26 
Q6    1   1.0631  0.2490  0.4153  11.00000  0.05    0.26 
Q7    1   0.7002 -0.0567  0.2994  11.00000  0.05    0.25 
Q8    1   1.1579  0.3048  0.5439  11.00000  0.05    0.25 
Q9    1   0.7346 -0.0409  0.3139  11.00000  0.05    0.24 
Q10   1   0.8185  0.1522  0.3840  11.00000  0.05    0.22 
Q11   1   1.3395  0.2632  0.3197  11.00000  0.05    0.22 
Q12   1   1.3831  0.2997  0.2430  11.00000  0.05    0.21 
Q13   1   0.6787 -0.0837  0.2896  11.00000  0.05    0.21 
Q14   1   0.8744 -0.0370  0.2408  11.00000  0.05    0.20 
Q15   1   0.9922  0.3542  0.5170  11.00000  0.05    0.19 
Q16   1   1.2619  0.2536  0.4991  11.00000  0.05    0.18 
Q17   1   0.8025  0.0249  0.2538  11.00000  0.05    0.18 
Q18   1   0.4644 -0.0619  0.2616  11.00000  0.05    0.18 
Q19   1   0.9233  0.2626  0.2226  11.00000  0.05    0.18 
Q20   1   1.3084  0.3707  0.2425  11.00000  0.05    0.17 
; 
_shelx_res_checksum   75554 
  
_shelx_hkl_file 
; 
   1   0   0  133.20    7.27 
   2   0   0  164.37    9.02 
  -3   0   0   27.82    1.68 
  -4   0   0    2.66    0.42 
  -5   0   0   20.19    1.41 
  -6   0   0    0.48    0.35 
  -7   0   0    1.47    0.52 
  -8   0   0    0.32    0.50 
  -9   1   0   -0.22    0.52 
  -8   1   0   -0.18    0.43 
  -7   1   0    1.40    0.48 
  -6   1   0    0.45    0.31 
  -5   1   0    0.24    0.20 
  -4   1   0   12.97    0.92 
   3  -1   0    0.03    0.16 
   2  -1   0    8.67    0.62 
   0  -1   0   -0.34    0.01 
   0   1   0   -0.31    0.01 
  -1  -1   0   11.78    0.73 
  -2  -1   0   49.60    2.82 
  -3  -1   0    7.13    0.59 
  -4  -1   0   -0.01    0.17 
  -5  -1   0   16.18    1.21 
  -6  -1   0    3.33    0.61 
  -7  -1   0   -0.06    0.40 
  -8  -1   0    0.24    0.51 
  -9  -1   0   -0.24    0.64 
  -9   2   0    0.25    0.49 
  -8   2   0    0.46    0.49 
  -8   2   0    0.15    0.42 
  -7   2   0    0.10    0.34 
  -6   2   0    0.18    0.24 
  -5   2   0   -0.06    0.17 
   4  -2   0    9.56    0.81 
   3  -2   0   -0.03    0.14 
   2  -2   0    2.55    0.28 
   1  -2   0 1000.00   53.47 
  -1   2   0  982.81   52.20 
   0  -2   0  210.16   11.44 
   0   2   0  221.47   11.24 
   0   2   0  202.39   11.18 
  -1  -2   0  527.02   28.75 
   1   2   0  538.25   28.15 
  -2  -2   0   26.04    1.58 
  -3  -2   0    8.64    0.70 
  -4  -2   0    5.68    0.64 
  -5  -2   0   23.70    1.64 
  -6  -2   0    0.18    0.31 
  -7  -2   0    0.64    0.43 
  -8  -2   0    0.24    0.53 
  -9  -2   0    0.89    0.73 
  -9   3   0   -0.73    0.49 
  -8   3   0    1.17    0.50 
  -7   3   0    0.36    0.39 
  -7   3   0    0.15    0.37 
  -6   3   0    0.22    0.26 
   5  -3   0    1.97    0.45 
   3  -3   0   30.76    1.93 
  -3   3   0   33.64    1.87 
   2  -3   0   64.36    3.54 
  -2   3   0   62.17    3.45 
   1  -3   0   36.76    1.97 
  -1   3   0   34.11    1.98 
  -1   3   0   35.06    1.93 
   0  -3   0   35.04    1.98 
   0   3   0   33.33    1.94 
   0   3   0   36.97    1.94 
  -1  -3   0   79.59    4.42 
   1   3   0   79.49    4.37 
  -2  -3   0   25.21    1.56 
  -3  -3   0    0.47    0.21 
  -4  -3   0    5.86    0.67 
  -5  -3   0   -0.07    0.27 
  -6  -3   0    6.36    0.85 
  -7  -3   0    1.35    0.52 
  -8  -3   0    0.05    0.57 
  -9  -3   0    1.20    0.78 
  -9   4   0    0.43    0.61 
  -8   4   0   -0.20    0.38 
  -7   4   0    2.49    0.56 
  -7   4   0    3.15    0.59 
  -6   4   0    3.19    0.50 
  -6   4   0    1.97    0.47 
   5  -4   0    0.14    0.19 
  -5   4   0    0.10    0.19 
   4  -4   0   21.57    1.41 
  -4   4   0   20.68    1.34 
   3  -4   0   25.55    1.52 
  -3   4   0   23.69    1.46 
   2  -4   0    0.17    0.11 
  -2   4   0   -0.11    0.09 
   1  -4   0   27.85    1.55 
  -1   4   0   26.85    1.52 
  -1   4   0   27.19    1.58 
   0  -4   0    1.73    0.26 
   0   4   0    2.30    0.24 
   0   4   0    2.26    0.25 
  -1  -4   0    9.17    0.67 
   1   4   0    9.41    0.70 
  -2  -4   0    2.78    0.38 
  -3  -4   0    4.77    0.56 
  -4  -4   0    0.31    0.23 
  -5  -4   0    2.39    0.52 
  -6  -4   0   -0.35    0.33 
  -7  -4   0   -0.28    0.42 
  -8  -4   0    0.21    0.59 
  -9   5   0    0.60    0.58 
  -8   5   0   -0.03    0.39 
  -7   5   0    1.44    0.45 
  -6   5   0    0.17    0.26 
   5  -5   0    8.22    0.80 
  -5   5   0    7.19    0.70 
   4  -5   0   17.03    1.15 
  -4   5   0   16.03    1.08 
   3  -5   0    2.05    0.31 
  -3   5   0    2.42    0.31 
   2  -5   0   70.94    3.91 
  -2   5   0   70.95    3.95 
  -2   5   0   70.07    3.85 
   1  -5   0   73.59    4.06 
  -1   5   0   75.17    3.99 
  -1   5   0   72.31    4.05 
   0  -5   0    1.17    0.24 
   0   5   0    1.20    0.20 
   0   5   0    1.28    0.22 
  -1  -5   0   67.27    3.69 
   1   5   0   63.24    3.66 
   1   5   0   63.94    3.59 
  -2  -5   0    6.94    0.61 
  -3  -5   0    4.37    0.55 
  -4  -5   0   20.50    1.47 
  -5  -5   0    7.14    0.86 
  -6  -5   0    1.78    0.57 
  -7  -5   0   -0.02    0.46 
  -8  -5   0    0.11    0.62 
  -9   6   0    0.45    0.60 
  -8   6   0    0.32    0.43 
  -7   6   0    0.32    0.34 
   6  -6   0    1.90    0.49 
  -6   6   0    2.81    0.49 
   5  -6   0   10.77    0.89 
  -5   6   0   10.42    0.82 
   4  -6   0   14.52    1.00 
  -4   6   0   13.37    0.95 
   3  -6   0    0.03    0.13 
  -3   6   0   -0.01    0.13 
   2  -6   0    0.89    0.17 
  -2   6   0    0.90    0.24 
  -2   6   0    0.97    0.19 
   1  -6   0    9.91    0.72 
  -1   6   0   12.84    0.79 
  -1   6   0   11.94    0.74 
   0  -6   0   10.12    0.73 
   0   6   0   10.79    0.71 
   0   6   0   10.11    0.72 
  -1  -6   0    2.11    0.37 
   1   6   0    2.81    0.34 
   1   6   0    3.21    0.45 
  -2  -6   0    2.02    0.39 
   2   6   0    1.93    0.43 
  -3  -6   0    3.49    0.54 
  -4  -6   0    7.15    0.82 
  -5  -6   0   10.09    1.09 
  -6  -6   0   -0.16    0.36 
  -7  -6   0   -0.67    0.49 
  -8  -6   0    0.85    0.75 
  -8   7   0    0.58    0.44 
  -7   7   0    0.71    0.36 
  -6   7   0    3.15    0.51 
   5  -7   0    0.09    0.23 
  -5   7   0    0.14    0.20 
   4  -7   0    0.96    0.26 
  -4   7   0    1.49    0.29 
   3  -7   0    0.33    0.16 
  -3   7   0    0.15    0.17 
  -3   7   0    0.16    0.15 
   2  -7   0   28.72    1.65 
  -2   7   0   26.88    1.72 
  -2   7   0   28.12    1.63 
  -1   7   0    1.99    0.28 
  -1   7   0    1.97    0.31 
   0  -7   0    4.90    0.50 
   0   7   0    4.73    0.49 
   0   7   0    5.30    0.47 
  -1  -7   0    4.92    0.54 
   1   7   0    3.89    0.44 
   1   7   0    4.13    0.53 
  -2  -7   0    5.42    0.65 
   2   7   0    6.67    0.76 
  -3  -7   0    3.77    0.59 
  -4  -7   0    2.20    0.55 
  -5  -7   0    0.48    0.42 
  -6  -7   0    1.15    0.56 
  -7  -7   0   -0.67    0.50 
  -8  -7   0   -0.41    0.61 
  -9   8   0    2.09    0.75 
  -8   8   0    1.07    0.51 
  -7   8   0    2.46    0.52 
  -6   8   0   10.55    0.89 
   5  -8   0    0.37    0.30 
  -5   8   0    0.75    0.26 
   4  -8   0    9.17    0.74 
  -4   8   0   10.09    0.86 
  -4   8   0    9.26    0.72 
   3  -8   0    0.86    0.21 
  -3   8   0    1.01    0.23 
  -3   8   0    0.92    0.30 
   2  -8   0    2.27    0.27 
  -2   8   0    1.94    0.36 
  -2   8   0    2.24    0.31 
  -1   8   0    3.47    0.40 
  -1   8   0    3.59    0.42 
   0  -8   0   13.08    0.94 
   0   8   0   12.14    0.92 
   0   8   0   13.32    0.89 
  -1  -8   0   17.26    1.24 
   1   8   0   18.00    1.26 
   1   8   0   17.20    1.16 
  -2  -8   0    4.39    0.60 
   2   8   0    4.02    0.65 
  -3  -8   0   12.80    1.08 
  -4  -8   0    1.21    0.47 
  -5  -8   0   -0.24    0.39 
  -6  -8   0    0.84    0.58 
  -7  -8   0    0.35    0.60 
  -8  -8   0   -0.54    0.57 
  -9   9   0   -0.34    0.53 
  -8   9   0    0.58    0.52 
  -7   9   0   -0.02    0.32 
  -7   9   0    0.15    0.36 
  -6   9   0    0.06    0.28 
  -6   9   0    0.12    0.35 
  -5   9   0    9.48    0.75 
  -5   9   0    8.04    0.94 
   4  -9   0    7.79    0.64 
  -4   9   0    6.13    0.78 
  -4   9   0    8.43    0.66 
   3  -9   0   54.65    3.10 
  -3   9   0   53.91    3.08 
  -3   9   0   54.11    3.22 
   2  -9   0   29.21    1.70 
  -2   9   0   28.95    1.71 
  -2   9   0   26.52    1.77 
   1  -9   0    2.28    0.35 
  -1   9   0    3.79    0.43 
  -1   9   0    3.43    0.43 
   0  -9   0   29.66    1.90 
   0   9   0   32.66    1.87 
   0   9   0   28.89    1.89 
  -1  -9   0    1.06    0.36 
   1   9   0    1.96    0.42 
   1   9   0    1.44    0.32 
  -2  -9   0    1.96    0.45 
   2   9   0    2.70    0.54 
  -3  -9   0    9.85    1.01 
  -4  -9   0    6.56    0.89 
  -5  -9   0    2.92    0.74 
  -6  -9   0    0.01    0.50 
  -7  -9   0   -0.11    0.63 
  -9  10   0    0.64    0.53 
  -8  10   0   -0.18    0.42 
  -7  10   0    0.78    0.47 
  -6  10   0    0.94    0.35 
  -6  10   0    1.02    0.43 
  -5  10   0    0.64    0.25 
  -5  10   0    0.07    0.28 
  -4  10   0    1.07    0.29 
  -4  10   0    1.17    0.39 
   3 -10   0    0.35    0.17 
  -3  10   0    0.08    0.23 
  -3  10   0    0.76    0.23 
   2 -10   0    3.92    0.42 
  -2  10   0    4.48    0.56 
  -2  10   0    3.98    0.46 
   1 -10   0   12.70    0.90 
  -1  10   0   12.94    0.92 
  -1  10   0   11.25    0.89 
   0 -10   0    4.40    0.57 
   0  10   0    4.49    0.58 
   0  10   0    4.55    0.52 
  -1 -10   0    0.62    0.34 
   1  10   0    0.61    0.26 
   1  10   0    0.36    0.27 
  -2 -10   0   18.12    1.39 
   2  10   0   17.17    1.41 
  -3 -10   0    7.96    0.95 
  -4 -10   0    4.62    0.79 
  -5 -10   0    0.18    0.45 
  -6 -10   0   -0.33    0.51 
  -7 -10   0    0.40    0.72 
  -9  11   0   -0.09    0.49 
  -8  11   0    0.22    0.50 
  -7  11   0    0.88    0.50 
  -6  11   0    0.77    0.46 
  -6  11   0    0.89    0.38 
  -5  11   0    0.48    0.37 
  -5  11   0    1.38    0.31 
  -4  11   0    8.25    0.70 
  -4  11   0    8.08    0.92 
   3 -11   0    2.86    0.38 
  -3  11   0    3.39    0.55 
  -3  11   0    2.88    0.44 
   2 -11   0    0.25    0.18 
  -2  11   0    0.24    0.21 
  -2  11   0   -0.05    0.19 
   1 -11   0    2.44    0.41 
  -1  11   0    2.21    0.41 
  -1  11   0    1.49    0.35 
   0 -11   0    0.13    0.30 
   0  11   0    0.34    0.23 
   0  11   0    0.54    0.27 
  -1 -11   0   17.26    1.32 
   1  11   0   17.67    1.25 
   1  11   0   16.87    1.33 
  -2 -11   0    0.12    0.37 
   2  11   0   -0.15    0.32 
  -4 -11   0    0.34    0.45 
  -5 -11   0    0.47    0.44 
  -6 -11   0    0.62    0.66 
  -7 -11   0   -0.19    0.74 
  -8  12   0    0.37    0.55 
  -7  12   0    0.42    0.50 
  -6  12   0    1.51    0.54 
  -5  12   0    4.14    0.71 
  -5  12   0    4.18    0.55 
   3 -12   0    8.10    0.72 
  -3  12   0    7.74    0.74 
  -3  12   0    8.77    0.90 
   2 -12   0    4.23    0.47 
  -2  12   0    3.41    0.54 
  -2  12   0    3.35    0.51 
   1 -12   0   16.02    1.15 
  -1  12   0   16.68    1.18 
  -1  12   0   14.97    1.15 
   0 -12   0    2.38    0.50 
   0  12   0    2.12    0.45 
   0  12   0    2.39    0.42 
  -1 -12   0    4.06    0.68 
   1  12   0    3.74    0.67 
   1  12   0    3.20    0.55 
  -2 -12   0   12.44    1.19 
   2  12   0    8.80    1.13 
  -3 -12   0    2.25    0.65 
  -4 -12   0    0.38    0.43 
  -5 -12   0    0.24    0.52 
  -6 -12   0    0.03    0.56 
  -8  13   0   -0.11    0.51 
  -7  13   0   -0.06    0.45 
  -6  13   0   -0.07    0.37 
  -5  13   0    0.73    0.42 
  -4  13   0    0.38    0.34 
  -3  13   0    0.01    0.29 
  -3  13   0    0.07    0.26 
   2 -13   0    0.85    0.27 
  -2  13   0    0.57    0.31 
  -2  13   0    1.33    0.38 
   1 -13   0    0.67    0.32 
  -1  13   0    0.47    0.29 
  -1  13   0    0.41    0.29 
   0 -13   0    0.62    0.35 
   0  13   0    1.62    0.42 
   0  13   0    0.74    0.29 
  -1 -13   0    1.94    0.54 
   1  13   0    2.16    0.57 
   1  13   0    2.03    0.48 
  -2 -13   0    3.94    0.75 
   2  13   0    3.88    0.82 
  -3 -13   0   -0.36    0.41 
  -4 -13   0    0.19    0.49 
  -5 -13   0    0.96    0.67 
  -6 -13   0   -0.88    0.51 
  -8  14   0   -0.30    0.48 
  -7  14   0    1.44    0.68 
  -6  14   0    0.46    0.39 
  -5  14   0    0.21    0.34 
  -4  14   0    1.38    0.45 
  -3  14   0    0.04    0.31 
  -3  14   0    0.23    0.27 
   2 -14   0    1.16    0.33 
  -2  14   0    0.81    0.38 
  -2  14   0    0.94    0.34 
   1 -14   0    0.42    0.29 
  -1  14   0    0.49    0.30 
  -1  14   0   -0.07    0.24 
   0 -14   0    5.51    0.75 
   0  14   0    6.51    0.86 
   0  14   0    5.06    0.67 
  -1 -14   0    0.08    0.38 
   1  14   0    0.14    0.32 
   1  14   0   -0.26    0.39 
  -2 -14   0    2.15    0.60 
   2  14   0    0.91    0.54 
  -3 -14   0    0.28    0.51 
  -4 -14   0    0.40    0.51 
  -5 -14   0   -0.69    0.55 
  -7  15   0   -0.58    0.42 
  -6  15   0    0.12    0.39 
  -5  15   0    0.42    0.38 
  -4  15   0    0.65    0.40 
  -3  15   0    0.53    0.35 
  -2  15   0    0.13    0.32 
  -2  15   0    0.05    0.29 
   1 -15   0    0.77    0.36 
  -1  15   0    0.08    0.40 
  -1  15   0    0.46    0.30 
   0 -15   0    2.03    0.54 
   0  15   0    0.83    0.47 
   0  15   0    2.05    0.48 
  -1 -15   0    0.73    0.47 
   1  15   0    0.03    0.37 
   1  15   0    0.88    0.54 
  -2 -15   0    0.22    0.46 
   2  15   0    0.78    0.60 
  -3 -15   0    1.39    0.62 
  -4 -15   0    1.38    0.70 
  -5 -15   0    0.08    0.69 
  -7  16   0    0.33    0.55 
  -6  16   0   -0.02    0.45 
  -5  16   0    1.24    0.51 
  -4  16   0   -0.04    0.34 
  -3  16   0    0.13    0.32 
  -2  16   0    1.79    0.48 
   1 -16   0    0.95    0.44 
  -1  16   0    1.34    0.53 
  -1  16   0    0.87    0.41 
   0 -16   0    0.55    0.41 
   0  16   0    0.04    0.46 
   0  16   0    0.20    0.31 
  -1 -16   0    0.29    0.44 
   1  16   0    0.32    0.50 
   1  16   0    0.64    0.46 
  -2 -16   0   -0.18    0.48 
  -3 -16   0   -0.38    0.51 
  -4 -16   0   -0.47    0.58 
  -7  17   0    1.05    0.67 
  -6  17   0    0.34    0.51 
  -5  17   0    0.17    0.42 
  -4  17   0    0.48    0.46 
  -3  17   0    0.43    0.41 
  -2  17   0    0.14    0.34 
  -1  17   0    2.79    0.56 
  -1  17   0    2.28    0.68 
   0 -17   0    0.58    0.41 
   0  17   0    0.24    0.57 
   0  17   0    0.54    0.37 
  -1 -17   0    0.82    0.49 
   1  17   0    0.29    0.56 
  -2 -17   0   -0.47    0.48 
  -3 -17   0    1.04    0.66 
  -4 -17   0    0.36    0.72 
  -6  18   0    1.21    0.66 
  -5  18   0    0.12    0.49 
  -4  18   0    0.14    0.44 
  -3  18   0    0.28    0.43 
  -2  18   0    0.27    0.40 
  -1  18   0    0.30    0.33 
   0  18   0    1.59    0.70 
   0  18   0    1.31    0.54 
  -1 -18   0    0.19    0.49 
   1  18   0    0.28    0.68 
  -2 -18   0    0.44    0.59 
  -3 -18   0    0.09    0.70 
  -5  19   0    0.05    0.53 
  -4  19   0   -0.09    0.46 
  -3  19   0    0.43    0.46 
  -2  19   0    0.68    0.44 
  -1  19   0   -0.50    0.33 
  -1 -19   0    0.61    0.59 
  -2 -19   0    0.67    0.69 
  -4  20   0    0.64    0.61 
  -3  20   0    0.00    0.48 
  -2  20   0    0.00    0.45 
  -1  20   0    0.15    0.50 
  -3  21   0   -0.02    0.57 
  -2  21   0    0.06    0.52 
  -2  21  -1   -0.20    0.53 
  -3  21  -1    0.04    0.54 
  -2  20  -1    0.58    0.50 
  -3  20  -1   -0.05    0.46 
  -4  20  -1   -0.40    0.48 
  -2 -19   1   -0.74    0.54 
   1  19  -1   -0.24    0.70 
  -1  19  -1   -0.07    0.37 
  -2  19  -1    0.40    0.44 
  -3  19  -1    0.48    0.51 
  -4  19  -1    0.51    0.53 
  -5  19  -1    0.65    0.56 
  -3 -18   1    0.12    0.68 
   2  18  -1    0.85    0.78 
  -2 -18   1    0.58    0.63 
   1  18  -1   -0.11    0.59 
  -1 -18   1   -0.37    0.41 
   0  18  -1    0.05    0.56 
  -1  18  -1    1.31    0.45 
  -2  18  -1    0.20    0.37 
  -3  18  -1   -0.08    0.36 
  -4  18  -1    0.37    0.45 
  -5  18  -1   -0.42    0.40 
  -6  18  -1    1.06    0.63 
  -4 -17   1    0.75    0.74 
  -3 -17   1   -0.19    0.51 
   2  17  -1   -0.18    0.63 
  -2 -17   1   -0.31    0.43 
   1  17  -1    0.38    0.58 
  -1 -17   1    0.53    0.47 
   0  17  -1    0.49    0.54 
   0  17  -1    0.97    0.43 
   0 -17   1    0.41    0.48 
  -1  17  -1    0.20    0.46 
  -1  17  -1   -0.28    0.27 
  -2  17  -1    1.32    0.45 
  -3  17  -1    0.15    0.37 
  -4  17  -1    0.17    0.42 
  -5  17  -1    1.31    0.58 
  -6  17  -1    0.35    0.55 
  -7  17  -1    0.20    0.56 
  -4 -16   1   -0.33    0.63 
  -3 -16   1    0.08    0.51 
   2  16  -1   -0.75    0.42 
  -2 -16   1   -0.21    0.43 
   1  16  -1    0.08    0.47 
  -1 -16   1    0.36    0.44 
   0  16  -1    0.36    0.45 
   0  16  -1    0.37    0.33 
   0 -16   1    0.31    0.42 
  -1  16  -1    0.07    0.43 
  -1  16  -1   -0.01    0.28 
  -2  16  -1    0.53    0.44 
  -2  16  -1    1.20    0.42 
  -3  16  -1    0.61    0.38 
  -4  16  -1    0.33    0.41 
  -5  16  -1    0.69    0.47 
  -6  16  -1    0.49    0.44 
  -7  16  -1    0.03    0.52 
  -5 -15   1   -0.49    0.62 
  -4 -15   1   -0.89    0.49 
  -3 -15   1    0.94    0.61 
   2  15  -1   -0.33    0.44 
  -2 -15   1    0.16    0.44 
   1  15  -1    0.30    0.36 
   1  15  -1    0.48    0.50 
  -1 -15   1    0.78    0.49 
   0  15  -1    4.03    0.60 
   0  15  -1    3.67    0.74 
   0 -15   1    4.43    0.69 
  -1  15  -1   -0.26    0.27 
  -1  15  -1    0.42    0.29 
   1 -15   1    0.13    0.21 
  -2  15  -1    0.74    0.41 
  -2  15  -1   -0.16    0.26 
  -3  15  -1   -0.10    0.32 
  -3  15  -1   -0.58    0.27 
  -4  15  -1    0.97    0.43 
  -5  15  -1    0.34    0.40 
  -6  15  -1    0.28    0.42 
  -7  15  -1   -0.24    0.47 
  -5 -14   1   -0.17    0.51 
  -4 -14   1   -0.01    0.45 
  -3 -14   1   -0.18    0.44 
   2  14  -1    0.16    0.42 
  -2 -14   1    0.01    0.40 
   1  14  -1    1.06    0.42 
   1  14  -1    0.92    0.48 
  -1 -14   1    1.21    0.51 
   0  14  -1    0.23    0.26 
   0  14  -1   -0.10    0.34 
   0 -14   1    0.30    0.39 
  -1  14  -1    7.13    0.80 
  -1  14  -1    9.80    0.94 
  -2  14  -1    1.10    0.39 
  -2  14  -1    1.50    0.40 
  -3  14  -1   -0.08    0.25 
  -3  14  -1   -0.01    0.30 
  -4  14  -1    0.58    0.39 
  -4  14  -1    1.02    0.41 
  -5  14  -1   -0.46    0.29 
  -6  14  -1    0.71    0.44 
  -7  14  -1    1.14    0.56 
  -8  14  -1    0.34    0.47 
  -6 -13   1    0.16    0.73 
  -5 -13   1   -0.32    0.51 
  -4 -13   1   -0.27    0.45 
  -3 -13   1    0.23    0.41 
   2  13  -1    2.04    0.62 
  -2 -13   1    1.70    0.55 
   1  13  -1    2.09    0.58 
   1  13  -1    2.10    0.46 
  -1 -13   1    2.37    0.57 
   0  13  -1    1.61    0.37 
   0  13  -1    0.81    0.38 
   0 -13   1    0.94    0.41 
  -1  13  -1   -0.10    0.24 
  -1  13  -1    0.10    0.23 
   1 -13   1    0.08    0.14 
  -2  13  -1   10.09    0.89 
  -2  13  -1    7.63    0.84 
   2 -13   1    8.63    0.72 
  -3  13  -1    3.49    0.53 
  -3  13  -1    2.81    0.55 
  -4  13  -1    0.96    0.39 
  -4  13  -1    1.10    0.35 
  -5  13  -1    3.01    0.63 
  -5  13  -1    2.43    0.51 
  -6  13  -1   -0.14    0.35 
  -7  13  -1    0.17    0.50 
  -8  13  -1    0.27    0.51 
  -6 -12   1   -0.18    0.49 
  -5 -12   1    1.20    0.58 
  -4 -12   1   -0.04    0.43 
  -3 -12   1   -0.31    0.36 
   2  12  -1    3.52    0.75 
  -2 -12   1    3.78    0.74 
   1  12  -1    1.07    0.44 
   1  12  -1    1.31    0.37 
  -1 -12   1    1.52    0.45 
   0  12  -1    1.93    0.37 
   0  12  -1    2.21    0.46 
   0 -12   1    1.57    0.45 
  -1  12  -1    1.98    0.42 
  -1  12  -1    1.97    0.38 
  -2  12  -1    0.37    0.23 
  -2  12  -1    0.26    0.26 
   2 -12   1    0.16    0.19 
  -3  12  -1    0.38    0.30 
  -3  12  -1    0.40    0.26 
  -4  12  -1    0.50    0.35 
  -4  12  -1    0.65    0.25 
  -5  12  -1    0.27    0.31 
  -5  12  -1    0.13    0.31 
  -6  12  -1    2.06    0.50 
  -6  12  -1    3.12    0.71 
  -7  12  -1    0.04    0.44 
  -8  12  -1    0.56    0.55 
  -7 -11   1   -0.06    0.66 
  -6 -11   1   -0.02    0.57 
  -5 -11   1    0.06    0.43 
  -4 -11   1    0.71    0.47 
  -3 -11   1   20.42    1.59 
   2  11  -1    3.02    0.63 
  -2 -11   1    5.32    0.75 
   1  11  -1    4.57    0.56 
   1  11  -1    4.79    0.69 
  -1 -11   1    4.64    0.67 
   0  11  -1    7.47    0.64 
   0  11  -1    6.45    0.74 
   0 -11   1    7.59    0.74 
  -1  11  -1    0.08    0.20 
  -1  11  -1    0.25    0.20 
   1 -11   1    0.37    0.19 
  -2  11  -1   13.91    1.00 
  -2  11  -1   13.06    1.04 
   2 -11   1   13.99    0.93 
  -3  11  -1    0.78    0.33 
  -3  11  -1    0.68    0.26 
  -4  11  -1    1.64    0.43 
  -5  11  -1    0.48    0.27 
  -5  11  -1    0.12    0.29 
  -6  11  -1    0.07    0.35 
  -6  11  -1    0.35    0.31 
  -7  11  -1    0.41    0.47 
  -8  11  -1   -0.27    0.45 
  -7 -10   1    0.75    0.76 
  -6 -10   1   -0.37    0.56 
  -5 -10   1    2.34    0.67 
  -4 -10   1   11.35    1.21 
  -3 -10   1   12.19    1.19 
   2  10  -1   10.26    1.13 
  -2 -10   1   13.39    1.07 
   1  10  -1    5.25    0.56 
   1  10  -1    5.79    0.71 
  -1 -10   1    5.07    0.67 
   0  10  -1    5.02    0.60 
   0  10  -1    4.36    0.50 
   0 -10   1    5.43    0.59 
  -1  10  -1    0.35    0.22 
  -1  10  -1    0.16    0.18 
   1 -10   1    0.29    0.20 
  -2  10  -1    2.32    0.41 
  -2  10  -1    2.60    0.40 
   2 -10   1    3.25    0.34 
  -3  10  -1   20.26    1.39 
  -3  10  -1   19.50    1.27 
   3 -10   1   18.53    1.19 
  -4  10  -1    5.57    0.59 
  -4  10  -1    5.32    0.71 
  -5  10  -1    3.39    0.49 
  -5  10  -1    2.51    0.56 
  -6  10  -1   -0.05    0.25 
  -6  10  -1   -0.38    0.27 
  -7  10  -1    0.20    0.42 
  -7  10  -1    0.48    0.38 
  -8  10  -1    0.44    0.52 
  -9  10  -1   -0.07    0.51 
  -7  -9   1    0.00    0.64 
  -6  -9   1    0.62    0.60 
  -5  -9   1    3.98    0.82 
  -4  -9   1    0.51    0.42 
  -3  -9   1    3.82    0.65 
   2   9  -1    2.17    0.51 
  -2  -9   1    3.69    0.57 
   1   9  -1    0.03    0.17 
   1   9  -1   -0.05    0.18 
  -1  -9   1   -0.12    0.21 
   0   9  -1   12.12    0.80 
   0   9  -1    9.63    0.82 
   0  -9   1   10.64    0.83 
  -1   9  -1    5.10    0.53 
  -1   9  -1    4.58    0.52 
   1  -9   1    5.77    0.49 
  -2   9  -1   12.54    0.92 
  -2   9  -1   14.04    0.99 
   2  -9   1   13.17    0.86 
  -3   9  -1   11.86    0.90 
  -3   9  -1   11.64    0.99 
   3  -9   1   14.12    0.85 
  -4   9  -1    1.32    0.39 
  -4   9  -1    1.73    0.33 
  -5   9  -1   11.52    0.90 
  -6   9  -1    4.17    0.60 
  -7   9  -1   -0.35    0.32 
  -8   9  -1   -0.22    0.36 
  -8  -8   1   -0.35    0.60 
  -7  -8   1    0.14    0.59 
  -6  -8   1    0.19    0.48 
  -5  -8   1    1.07    0.50 
  -4  -8   1   10.19    1.06 
  -3  -8   1    3.45    0.58 
   2   8  -1    3.09    0.56 
  -2  -8   1    2.23    0.45 
   1   8  -1    1.20    0.26 
   1   8  -1    2.17    0.43 
  -1  -8   1    2.59    0.42 
   0   8  -1    0.73    0.21 
   0   8  -1    0.82    0.25 
   0  -8   1    1.23    0.29 
  -1   8  -1   19.55    1.28 
  -1   8  -1   20.16    1.30 
   1  -8   1   21.66    1.28 
  -2   8  -1    5.93    0.53 
  -2   8  -1    5.75    0.60 
   2  -8   1    5.77    0.43 
  -3   8  -1    1.43    0.37 
  -3   8  -1    2.12    0.34 
   3  -8   1    2.60    0.28 
  -4   8  -1    1.20    0.29 
   4  -8   1    1.32    0.27 
  -5   8  -1    0.86    0.27 
  -6   8  -1    3.70    0.56 
  -7   8  -1    3.32    0.61 
  -8   8  -1    0.78    0.46 
  -8  -7   1    0.12    0.68 
  -7  -7   1    0.41    0.62 
  -6  -7   1    1.43    0.58 
  -5  -7   1    1.20    0.50 
  -4  -7   1    5.86    0.77 
  -3  -7   1    1.77    0.40 
   2   7  -1   16.18    1.17 
  -2  -7   1   13.19    1.05 
   1   7  -1    0.10    0.10 
   1   7  -1    0.42    0.24 
  -1  -7   1    0.65    0.23 
   0   7  -1    6.25    0.49 
   0   7  -1    5.95    0.56 
   0  -7   1    6.13    0.55 
  -1   7  -1    0.23    0.16 
  -1   7  -1    0.24    0.15 
   1  -7   1    0.16    0.15 
  -2   7  -1    0.70    0.22 
  -2   7  -1    0.39    0.18 
   2  -7   1    0.39    0.12 
  -3   7  -1    3.14    0.40 
   3  -7   1    3.48    0.34 
  -4   7  -1    2.28    0.37 
   4  -7   1    1.79    0.31 
  -5   7  -1   16.28    1.13 
   5  -7   1   15.86    1.14 
  -6   7  -1    2.03    0.46 
  -7   7  -1    1.81    0.47 
  -8   7  -1   -0.17    0.38 
  -9   7  -1    0.21    0.54 
  -8  -6   1   -0.24    0.58 
  -7  -6   1    0.06    0.54 
  -6  -6   1   -0.54    0.29 
  -5  -6   1   17.75    1.43 
  -4  -6   1    4.54    0.67 
  -3  -6   1   11.80    0.95 
   2   6  -1    2.65    0.49 
  -2  -6   1    2.56    0.40 
   1   6  -1   20.95    1.39 
  -1  -6   1   21.46    1.36 
   0   6  -1   27.30    1.72 
   0   6  -1   31.48    1.69 
   0  -6   1   28.40    1.72 
  -1   6  -1  161.41    8.82 
  -1   6  -1  166.61    8.89 
   1  -6   1  166.20    8.96 
  -2   6  -1    4.74    0.44 
   2  -6   1    4.92    0.36 
  -3   6  -1    3.78    0.42 
   3  -6   1    3.19    0.33 
  -4   6  -1   13.79    0.95 
   4  -6   1   13.00    0.92 
  -5   6  -1    2.41    0.41 
   5  -6   1    2.24    0.41 
  -6   6  -1    0.30    0.28 
  -7   6  -1   -0.12    0.35 
  -8   6  -1    0.15    0.43 
  -9   6  -1   -0.06    0.55 
  -8  -5   1   -0.16    0.61 
  -7  -5   1   -0.03    0.48 
  -6  -5   1    0.12    0.36 
  -5  -5   1    0.30    0.33 
  -4  -5   1    0.48    0.28 
  -3  -5   1   -0.11    0.16 
   2   5  -1    0.92    0.29 
  -2  -5   1    0.86    0.24 
   1   5  -1   78.68    4.41 
   1   5  -1   81.94    4.51 
  -1  -5   1   82.86    4.55 
   0   5  -1    0.11    0.12 
   0   5  -1    0.32    0.11 
   0  -5   1    0.05    0.12 
  -1   5  -1   11.50    0.76 
  -1   5  -1   11.18    0.73 
   1  -5   1   11.71    0.70 
  -2   5  -1    6.87    0.50 
   2  -5   1    6.55    0.45 
  -3   5  -1    7.22    0.57 
   3  -5   1    7.41    0.55 
  -4   5  -1   21.31    1.36 
   4  -5   1   21.06    1.36 
  -5   5  -1   20.41    1.31 
  -5   5  -1   20.69    1.39 
  -6   5  -1    2.35    0.49 
  -6   5  -1    2.15    0.40 
  -7   5  -1    0.51    0.41 
  -8   5  -1    0.37    0.47 
  -9   5  -1    0.72    0.62 
  -8  -4   1   -0.29    0.54 
  -7  -4   1    0.14    0.46 
  -6  -4   1    0.32    0.39 
  -5  -4   1    0.04    0.29 
  -4  -4   1    0.21    0.23 
  -3  -4   1    4.70    0.56 
   2   4  -1    1.69    0.35 
  -2  -4   1    1.66    0.31 
   1   4  -1   37.07    2.12 
   1   4  -1   35.62    2.02 
  -1  -4   1   36.46    2.11 
   0   4  -1  259.23   13.93 
   0   4  -1  276.01   13.97 
   0  -4   1  252.04   14.21 
  -1   4  -1   80.99    4.55 
   1  -4   1   87.85    4.61 
  -2   4  -1  116.27    6.34 
   2  -4   1  119.08    6.42 
  -3   4  -1   26.29    1.59 
   3  -4   1   27.05    1.60 
  -4   4  -1    1.52    0.30 
   4  -4   1    0.75    0.25 
  -5   4  -1    0.36    0.24 
  -5   4  -1    1.17    0.29 
  -6   4  -1    0.28    0.30 
  -6   4  -1    0.65    0.29 
  -7   4  -1    0.79    0.41 
  -8   4  -1    1.28    0.57 
  -9   4  -1    0.40    0.57 
  -9  -3   1    0.73    0.71 
  -8  -3   1   -0.34    0.46 
  -7  -3   1    0.81    0.51 
  -6  -3   1    0.32    0.36 
  -5  -3   1    7.09    0.83 
  -4  -3   1    0.56    0.27 
  -3  -3   1    1.67    0.32 
   2   3  -1   48.46    2.96 
  -2  -3   1   53.69    2.97 
   1   3  -1    0.02    0.11 
  -1  -3   1    0.20    0.12 
   0   3  -1  108.49    5.80 
  -1   3  -1    5.66    0.40 
   1  -3   1    5.88    0.35 
  -2   3  -1   21.63    1.26 
   2  -3   1   21.00    1.24 
  -3   3  -1    0.08    0.14 
   3  -3   1   -0.06    0.11 
  -4   3  -1   38.32    2.27 
  -4   3  -1   37.94    2.23 
  -5   3  -1    0.99    0.27 
  -5   3  -1    0.70    0.25 
  -6   3  -1    5.44    0.77 
  -6   3  -1    7.29    0.73 
  -7   3  -1    0.78    0.42 
  -7   3  -1    2.36    0.55 
  -8   3  -1    0.62    0.46 
  -9   3  -1    1.05    0.63 
  -9  -2   1    0.46    0.71 
  -8  -2   1    0.24    0.54 
  -7  -2   1   -0.26    0.36 
  -6  -2   1    0.19    0.33 
  -5  -2   1    0.17    0.25 
  -4  -2   1    0.99    0.28 
  -3  -2   1    2.20    0.36 
   2   2  -1    0.44    0.19 
   1   2  -1    9.49    0.63 
   1   2  -1    8.89    0.65 
   0   2  -1   77.54    4.15 
  -1   2  -1   20.17    1.11 
   1  -2   1   18.83    1.08 
  -2   2  -1   31.48    1.78 
   2  -2   1   31.01    1.80 
  -3   2  -1   22.58    1.36 
  -4   2  -1   15.07    1.02 
  -5   2  -1    0.03    0.17 
  -6   2  -1    0.35    0.27 
  -7   2  -1    0.19    0.37 
  -7   2  -1    0.16    0.37 
  -8   2  -1    0.00    0.44 
  -9   2  -1    0.10    0.51 
  -9  -1   1   -0.36    0.59 
  -8  -1   1    0.27    0.49 
  -7  -1   1    5.87    0.87 
  -6  -1   1    2.46    0.54 
  -5  -1   1   21.45    1.50 
  -4  -1   1    2.74    0.42 
   3   1  -1  186.25   10.34 
   2   1  -1   13.94    0.97 
   1   1  -1  596.23   31.28 
   1   1  -1  588.88   32.00 
   0   1  -1  553.47   30.89 
   0   1  -1  619.62   31.76 
  -1   1  -1   76.99    4.13 
  -1   1  -1   74.55    4.06 
  -2   1  -1   29.50    1.69 
  -3   1  -1    5.96    0.48 
  -4   1  -1    5.52    0.55 
  -5   1  -1    8.20    0.78 
  -6   1  -1    3.44    0.55 
  -7   1  -1    0.73    0.44 
  -8   1  -1   -0.30    0.46 
  -9   1  -1    0.96    0.62 
  -9   0   1    0.45    0.62 
  -8   0   1   -0.02    0.46 
  -7   0   1    0.41    0.43 
  -6   0   1    3.49    0.59 
  -5   0   1    1.54    0.39 
   4   0  -1    4.04    0.60 
   3   0  -1   23.81    1.57 
   2   0  -1  278.92   15.20 
   1   0  -1  144.33    7.88 
   0   0  -1   -0.01    0.01 
  -1   0  -1    2.67    0.22 
  -2   0  -1   17.27    1.06 
  -3   0  -1   37.95    2.24 
  -4   0  -1   38.27    2.32 
  -5   0  -1   22.99    1.55 
  -6   0  -1   -0.11    0.29 
  -7   0  -1    0.65    0.44 
  -8   0  -1    1.36    0.63 
  -9   0  -1   -0.20    0.55 
  -8   1   1    0.36    0.51 
  -7   1   1    2.17    0.56 
  -6   1   1    0.58    0.34 
   5  -1  -1    0.83    0.33 
   4  -1  -1    0.68    0.28 
   3  -1  -1   63.84    3.71 
   2  -1  -1  400.44   21.72 
   1  -1  -1  436.95   23.61 
   0  -1  -1  315.81   17.09 
   0   1   1  315.55   16.80 
  -1  -1  -1  107.14    5.87 
  -2  -1  -1   26.56    1.59 
  -3  -1  -1    0.74    0.21 
  -4  -1  -1    5.02    0.56 
  -5  -1  -1    3.65    0.54 
  -6  -1  -1    0.29    0.33 
  -7  -1  -1    0.80    0.50 
  -8  -1  -1    0.46    0.53 
  -9   2   1    0.98    0.60 
  -8   2   1    1.38    0.60 
  -7   2   1   -0.09    0.33 
  -6   2   1    7.94    0.81 
   5  -2  -1   -0.08    0.21 
   4  -2  -1   21.04    1.47 
   3  -2  -1   26.01    1.65 
   2  -2  -1   60.69    3.43 
   1  -2  -1  900.17   47.15 
  -1   2   1  890.16   46.12 
  -1   2   1  833.80   46.31 
   0  -2  -1   39.93    2.25 
   0   2   1   38.16    2.18 
   0   2   1   42.66    2.21 
  -1  -2  -1   59.50    3.33 
  -2  -2  -1    7.97    0.61 
  -3  -2  -1    5.45    0.55 
  -4  -2  -1    1.52    0.36 
  -5  -2  -1    8.00    0.82 
  -6  -2  -1   -0.09    0.33 
  -7  -2  -1    0.62    0.49 
  -8  -2  -1   -0.19    0.50 
  -9  -2  -1   -0.19    0.66 
  -9   3   1    0.32    0.55 
  -8   3   1    0.48    0.48 
  -7   3   1    0.74    0.41 
   6  -3  -1    0.31    0.32 
   5  -3  -1    4.03    0.64 
   4  -3  -1    8.40    0.79 
   3  -3  -1   54.12    3.14 
  -2   3   1  830.70   43.76 
   1  -3  -1   27.20    1.62 
  -1   3   1   29.90    1.63 
  -1   3   1   28.78    1.55 
   0  -3  -1    2.13    0.25 
   0   3   1    2.22    0.23 
   0   3   1    2.22    0.23 
  -1  -3  -1    4.06    0.40 
  -2  -3  -1   83.50    4.70 
  -3  -3  -1    1.61    0.33 
  -4  -3  -1   42.31    2.60 
  -5  -3  -1   -0.13    0.26 
  -6  -3  -1    0.81    0.45 
  -7  -3  -1    0.43    0.49 
  -8  -3  -1   -0.41    0.51 
  -9  -3  -1    0.44    0.71 
  -9   4   1    0.60    0.57 
  -8   4   1   -0.04    0.38 
  -7   4   1    3.39    0.63 
  -7   4   1    2.71    0.56 
   6  -4  -1    3.30    0.62 
  -6   4   1    2.17    0.47 
   5  -4  -1    3.70    0.60 
  -5   4   1    3.90    0.50 
   4  -4  -1    0.05    0.17 
  -4   4   1    0.35    0.18 
   3  -4  -1    0.03    0.13 
  -3   4   1    0.24    0.13 
  -2   4   1   91.29    5.04 
  -2   4   1   92.57    4.94 
   1  -4  -1    4.34    0.33 
  -1   4   1    4.33    0.30 
  -1   4   1    3.90    0.37 
   0  -4  -1   28.90    1.74 
   0   4   1   29.29    1.69 
   0   4   1   30.63    1.70 
  -1  -4  -1   43.06    2.50 
  -2  -4  -1   27.90    1.74 
  -3  -4  -1    2.26    0.41 
  -4  -4  -1   30.54    2.00 
  -5  -4  -1    1.40    0.46 
  -6  -4  -1    1.25    0.51 
  -7  -4  -1   -0.01    0.48 
  -8  -4  -1    1.05    0.68 
  -9   5   1    0.02    0.54 
  -8   5   1    0.94    0.49 
  -7   5   1    1.98    0.48 
  -7   5   1    1.85    0.49 
   6  -5  -1    0.53    0.33 
  -6   5   1    4.85    0.56 
   5  -5  -1    0.21    0.22 
  -5   5   1    0.32    0.21 
   4  -5  -1   17.86    1.17 
  -4   5   1   15.26    1.05 
   3  -5  -1   32.15    1.91 
  -3   5   1   31.56    1.92 
  -3   5   1   31.02    1.81 
   2  -5  -1   32.40    1.96 
  -2   5   1   34.94    2.00 
  -2   5   1   34.17    1.89 
   1  -5  -1   28.22    1.61 
  -1   5   1   28.21    1.55 
  -1   5   1   26.00    1.61 
   0  -5  -1   16.64    1.11 
   0   5   1   18.83    1.09 
   0   5   1   17.12    1.08 
  -1  -5  -1    3.09    0.42 
   1   5   1    3.66    0.45 
  -2  -5  -1    0.96    0.28 
  -3  -5  -1    6.41    0.71 
  -4  -5  -1    0.18    0.29 
  -5  -5  -1   10.45    1.10 
  -6  -5  -1    0.47    0.48 
  -7  -5  -1    0.10    0.49 
  -8  -5  -1    0.78    0.71 
  -8   6   1    0.72    0.50 
  -7   6   1   -0.14    0.29 
   6  -6  -1    3.22    0.60 
  -6   6   1    4.12    0.56 
   5  -6  -1    3.39    0.53 
  -5   6   1    2.76    0.43 
   4  -6  -1    5.95    0.60 
  -4   6   1    5.52    0.51 
   3  -6  -1   10.10    0.75 
  -3   6   1    9.87    0.79 
  -3   6   1   11.08    0.72 
   2  -6  -1    8.36    0.61 
  -2   6   1    7.45    0.65 
  -2   6   1    9.45    0.58 
   1  -6  -1    1.41    0.23 
  -1   6   1    1.33    0.25 
  -1   6   1    1.25    0.20 
   0  -6  -1    6.24    0.56 
   0   6   1    5.93    0.49 
   0   6   1    6.02    0.51 
  -1  -6  -1   -0.06    0.17 
   1   6   1    0.07    0.14 
   1   6   1    0.37    0.19 
  -2  -6  -1    1.76    0.37 
  -3  -6  -1    4.58    0.62 
  -4  -6  -1    0.99    0.41 
  -5  -6  -1    1.50    0.55 
  -6  -6  -1   -0.20    0.40 
  -7  -6  -1    0.92    0.58 
  -8  -6  -1    0.48    0.70 
  -9   7   1   -0.17    0.46 
  -8   7   1    0.27    0.40 
  -7   7   1    2.22    0.51 
   6  -7  -1   12.51    1.10 
  -6   7   1    9.57    0.83 
   5  -7  -1    1.36    0.35 
  -5   7   1    0.55    0.23 
  -5   7   1    0.51    0.33 
   4  -7  -1    3.86    0.48 
  -4   7   1    3.78    0.57 
  -4   7   1    3.95    0.43 
   3  -7  -1    1.14    0.24 
  -3   7   1    0.80    0.20 
  -3   7   1    1.12    0.30 
   2  -7  -1    6.22    0.51 
  -2   7   1    6.88    0.59 
  -2   7   1    7.21    0.49 
   1  -7  -1   85.16    4.65 
  -1   7   1   77.59    4.60 
  -1   7   1   86.45    4.54 
   0  -7  -1   55.40    3.18 
   0   7   1   58.39    3.12 
   0   7   1   50.34    3.09 
  -1  -7  -1    9.28    0.81 
   1   7   1    9.29    0.75 
   1   7   1   11.48    0.85 
  -2  -7  -1    2.09    0.44 
  -3  -7  -1    1.68    0.42 
  -4  -7  -1   -0.28    0.35 
  -5  -7  -1    3.73    0.75 
  -6  -7  -1    0.33    0.53 
  -7  -7  -1    0.59    0.63 
  -8  -7  -1   -0.36    0.64 
  -9   8   1   -0.36    0.51 
  -8   8   1   -0.56    0.41 
  -7   8   1    1.20    0.51 
  -7   8   1    0.52    0.37 
  -6   8   1    1.66    0.33 
  -6   8   1    1.49    0.49 
   5  -8  -1   22.69    1.54 
  -5   8   1   22.47    1.60 
  -5   8   1   21.76    1.43 
   4  -8  -1    5.89    0.60 
  -4   8   1    5.46    0.69 
  -4   8   1    6.40    0.53 
   3  -8  -1    8.01    0.65 
  -3   8   1    8.80    0.63 
  -3   8   1    9.31    0.83 
   2  -8  -1   16.21    1.04 
  -2   8   1   15.40    1.11 
  -2   8   1   16.27    1.01 
   1  -8  -1   17.06    1.09 
  -1   8   1   17.89    1.08 
  -1   8   1   14.62    1.08 
   0  -8  -1   16.44    1.14 
   0   8   1   16.78    1.10 
   0   8   1   15.65    1.11 
  -1  -8  -1   39.71    2.38 
   1   8   1   38.12    2.30 
   1   8   1   36.77    2.36 
  -2  -8  -1    6.99    0.79 
  -3  -8  -1    0.47    0.35 
  -4  -8  -1    8.77    1.03 
  -5  -8  -1    0.33    0.48 
  -6  -8  -1    1.58    0.68 
  -7  -8  -1   -0.47    0.58 
  -9   9   1    0.30    0.52 
  -8   9   1    0.31    0.50 
  -7   9   1    0.42    0.42 
  -6   9   1   -0.08    0.30 
  -6   9   1    0.64    0.24 
  -5   9   1    1.72    0.47 
  -5   9   1    1.61    0.33 
   4  -9  -1    2.79    0.43 
  -4   9   1    2.98    0.52 
  -4   9   1    3.66    0.42 
   3  -9  -1    4.09    0.44 
  -3   9   1    2.45    0.45 
  -3   9   1    3.83    0.40 
   2  -9  -1    1.41    0.26 
  -2   9   1    1.56    0.27 
  -2   9   1    1.21    0.30 
   1  -9  -1   21.22    1.29 
  -1   9   1   18.43    1.27 
  -1   9   1   18.32    1.23 
   0  -9  -1    3.62    0.51 
   0   9   1    4.02    0.52 
   0   9   1    4.07    0.49 
  -1  -9  -1    4.48    0.62 
   1   9   1    4.80    0.65 
   1   9   1    4.24    0.55 
  -2  -9  -1    2.08    0.50 
  -3  -9  -1    0.27    0.40 
  -4  -9  -1    1.24    0.53 
  -5  -9  -1    1.62    0.66 
  -6  -9  -1    0.30    0.58 
  -7  -9  -1   -0.05    0.68 
  -9  10   1    0.90    0.62 
  -8  10   1    0.68    0.54 
  -7  10   1    2.26    0.60 
  -6  10   1    0.01    0.34 
  -5  10   1    0.15    0.20 
  -5  10   1    0.26    0.33 
   4 -10  -1   10.57    0.82 
  -4  10   1    9.28    0.97 
  -4  10   1   10.30    0.77 
   3 -10  -1    0.03    0.16 
  -3  10   1    0.35    0.24 
  -3  10   1    0.09    0.17 
   2 -10  -1    8.31    0.68 
  -2  10   1    9.73    0.70 
  -2  10   1    8.64    0.81 
   1 -10  -1   -0.19    0.19 
  -1  10   1   -0.08    0.14 
  -1  10   1    0.04    0.16 
   0 -10  -1    0.96    0.33 
   0  10   1    1.67    0.34 
   0  10   1    0.69    0.27 
  -1 -10  -1    6.89    0.82 
   1  10   1    8.95    0.89 
   1  10   1    7.62    0.77 
  -2 -10  -1   12.07    1.16 
  -3 -10  -1   10.98    1.19 
  -4 -10  -1    0.85    0.51 
  -5 -10  -1   -0.49    0.52 
  -6 -10  -1    0.63    0.73 
  -7 -10  -1   -0.07    0.72 
  -9  11   1   -0.54    0.49 
  -8  11   1    0.36    0.54 
  -7  11   1    0.31    0.43 
  -6  11   1    3.20    0.67 
  -5  11   1    4.28    0.51 
  -5  11   1    2.67    0.62 
  -4  11   1    9.84    0.74 
  -4  11   1    7.67    0.92 
   3 -11  -1    2.25    0.38 
  -3  11   1    2.29    0.38 
  -3  11   1    1.79    0.44 
   2 -11  -1   17.03    1.37 
  -2  11   1   26.39    1.46 
  -2  11   1   24.70    1.54 
   1 -11  -1   -0.09    0.20 
  -1  11   1    0.24    0.21 
  -1  11   1    0.60    0.27 
   0 -11  -1    0.37    0.30 
   0  11   1   -0.03    0.22 
   0  11   1    0.54    0.24 
  -1 -11  -1    4.15    0.65 
   1  11   1    2.74    0.50 
   1  11   1    3.09    0.59 
  -2 -11  -1   10.85    1.13 
  -3 -11  -1   -0.07    0.39 
  -4 -11  -1   -0.06    0.43 
  -5 -11  -1   -0.06    0.47 
  -6 -11  -1    0.61    0.76 
  -7 -11  -1   -0.11    0.75 
  -8  12   1    0.13    0.50 
  -7  12   1    0.06    0.42 
  -6  12   1    0.10    0.42 
  -5  12   1    2.17    0.57 
  -4  12   1    2.30    0.41 
  -4  12   1    1.83    0.49 
   3 -12  -1   -0.24    0.19 
  -3  12   1    0.45    0.27 
  -3  12   1   -0.19    0.21 
   2 -12  -1    0.21    0.19 
  -2  12   1   -0.06    0.23 
  -2  12   1    0.40    0.25 
   1 -12  -1    0.54    0.29 
  -1  12   1    0.20    0.24 
  -1  12   1    0.54    0.26 
   0 -12  -1   17.42    1.28 
   0  12   1   14.00    1.19 
   0  12   1   16.49    1.18 
  -1 -12  -1   10.04    1.06 
   1  12   1   10.05    0.97 
   1  12   1   11.22    1.10 
  -2 -12  -1    0.75    0.50 
  -3 -12  -1    1.08    0.53 
  -4 -12  -1   -0.37    0.41 
  -5 -12  -1    1.37    0.64 
  -6 -12  -1    0.67    0.75 
  -8  13   1    0.94    0.61 
  -7  13   1    0.58    0.54 
  -6  13   1   -0.40    0.35 
  -5  13   1    1.13    0.45 
  -4  13   1    0.86    0.38 
  -3  13   1    4.22    0.68 
  -3  13   1    5.16    0.59 
  -2  13   1    2.99    0.47 
  -2  13   1    2.34    0.48 
   1 -13  -1    1.70    0.42 
  -1  13   1    1.89    0.41 
  -1  13   1    1.72    0.41 
   0 -13  -1   20.40    1.55 
   0  13   1   20.87    1.55 
   0  13   1   21.64    1.50 
  -1 -13  -1    0.67    0.45 
   1  13   1   -0.35    0.35 
   1  13   1    0.03    0.33 
  -2 -13  -1    9.16    1.10 
  -3 -13  -1   -0.02    0.41 
  -4 -13  -1    0.43    0.55 
  -5 -13  -1   -0.02    0.54 
  -6 -13  -1   -0.10    0.66 
  -8  14   1   -0.64    0.52 
  -7  14   1    0.94    0.58 
  -6  14   1   -0.03    0.43 
  -5  14   1    0.62    0.40 
  -4  14   1   -0.17    0.25 
  -3  14   1    0.27    0.31 
   2 -14  -1    0.23    0.18 
  -2  14   1    0.51    0.32 
  -2  14   1    0.82    0.30 
   1 -14  -1    0.47    0.32 
  -1  14   1   -0.30    0.25 
  -1  14   1    0.50    0.31 
   0 -14  -1    5.11    0.76 
   0  14   1    5.79    0.85 
   0  14   1    6.68    0.77 
  -1 -14  -1    2.10    0.56 
   1  14   1    1.16    0.53 
   1  14   1    1.06    0.46 
  -2 -14  -1   -0.30    0.40 
  -3 -14  -1    1.71    0.61 
  -4 -14  -1    0.28    0.55 
  -5 -14  -1    0.67    0.67 
  -7  15   1    0.04    0.48 
  -6  15   1    0.60    0.46 
  -5  15   1    0.87    0.49 
  -4  15   1   -0.58    0.27 
  -3  15   1    0.60    0.37 
   2 -15  -1    0.23    0.22 
  -2  15   1    1.35    0.43 
   1 -15  -1    4.00    0.62 
  -1  15   1    4.15    0.69 
  -1  15   1    2.26    0.50 
   0 -15  -1    0.52    0.40 
   0  15   1    0.42    0.35 
   0  15   1    0.31    0.44 
  -1 -15  -1    0.39    0.41 
   1  15   1   -0.38    0.43 
   1  15   1    0.52    0.41 
  -2 -15  -1    0.13    0.47 
  -3 -15  -1    0.12    0.50 
  -4 -15  -1    0.14    0.58 
  -5 -15  -1   -0.22    0.66 
  -7  16   1    0.23    0.55 
  -6  16   1    1.05    0.57 
  -5  16   1    0.82    0.48 
  -4  16   1    2.21    0.56 
  -3  16   1   -0.14    0.30 
  -2  16   1    2.96    0.59 
   1 -16  -1    0.35    0.33 
  -1  16   1    0.09    0.29 
  -1  16   1   -0.45    0.39 
   0 -16  -1    1.87    0.54 
   0  16   1    1.80    0.64 
   0  16   1    1.64    0.48 
  -1 -16  -1   -0.01    0.45 
   1  16   1    0.02    0.48 
  -2 -16  -1    0.64    0.56 
  -3 -16  -1    0.64    0.57 
  -4 -16  -1   -0.02    0.61 
  -7  17   1    0.74    0.69 
  -6  17   1   -0.36    0.51 
  -5  17   1    0.71    0.49 
  -4  17   1    0.02    0.35 
  -3  17   1    0.13    0.39 
  -2  17   1    0.20    0.35 
  -1  17   1    1.97    0.50 
   0 -17  -1    0.65    0.48 
   0  17   1    0.98    0.46 
   0  17   1    0.91    0.62 
  -1 -17  -1    0.05    0.41 
   1  17   1    0.26    0.61 
  -2 -17  -1    0.01    0.48 
  -3 -17  -1   -0.62    0.53 
  -4 -17  -1    0.25    0.74 
  -6  18   1    0.04    0.57 
  -5  18   1    0.43    0.51 
  -4  18   1    0.64    0.49 
  -3  18   1    0.51    0.43 
  -2  18   1    0.51    0.40 
  -1  18   1   -0.39    0.32 
   0 -18  -1    0.53    0.49 
   0  18   1    0.20    0.41 
  -1 -18  -1    0.60    0.51 
  -2 -18  -1    0.11    0.61 
  -3 -18  -1   -0.63    0.63 
  -5  19   1   -0.28    0.51 
  -4  19   1   -0.24    0.42 
  -3  19   1    0.51    0.47 
  -2  19   1    0.38    0.42 
  -1  19   1    0.33    0.43 
   0  19   1    0.04    0.47 
  -1 -19  -1    0.92    0.61 
  -2 -19  -1    0.06    0.59 
  -4  20   1    0.46    0.55 
  -3  20   1    0.43    0.51 
  -2  20   1   -0.52    0.40 
  -1  20   1    0.05    0.45 
  -2  21   1    0.23    0.57 
  -1  21   1    0.38    0.69 
  -3  21  -2   -0.39    0.55 
   1  20  -2    0.72    0.87 
  -2  20  -2   -0.23    0.47 
  -3  20  -2    0.26    0.49 
  -4  20  -2    0.18    0.53 
   2  19  -2    0.77    0.84 
  -2 -19   2    0.56    0.72 
   1  19  -2    0.17    0.70 
   0  19  -2    1.52    0.74 
  -2  19  -2    0.08    0.38 
  -3  19  -2   -0.05    0.44 
  -4  19  -2   -0.42    0.43 
  -5  19  -2    0.25    0.56 
  -3 -18   2   -0.07    0.66 
   2  18  -2    0.70    0.75 
  -2 -18   2    1.05    0.61 
   1  18  -2   -0.26    0.54 
  -1 -18   2    0.10    0.59 
   0  18  -2    0.18    0.55 
  -1  18  -2    0.44    0.40 
  -1  18  -2    1.50    0.63 
  -2  18  -2    0.60    0.38 
  -3  18  -2   -0.60    0.35 
  -4  18  -2    3.54    0.74 
  -5  18  -2    0.13    0.48 
  -6  18  -2    0.91    0.62 
  -4 -17   2    0.36    0.74 
  -3 -17   2   -0.20    0.58 
   2  17  -2   -0.57    0.56 
  -2 -17   2    0.52    0.53 
   1  17  -2    0.02    0.54 
  -1 -17   2    0.59    0.51 
   0  17  -2    0.24    0.50 
   0  17  -2    0.26    0.40 
  -1  17  -2   -0.07    0.32 
  -1  17  -2   -0.39    0.44 
  -2  17  -2   -0.31    0.29 
  -2  17  -2   -0.23    0.41 
  -3  17  -2    0.50    0.40 
  -4  17  -2   -0.25    0.36 
  -5  17  -2    0.76    0.49 
  -6  17  -2    0.06    0.47 
  -4 -16   2    0.70    0.69 
  -3 -16   2    1.15    0.60 
   2  16  -2    0.78    0.57 
  -2 -16   2    0.60    0.53 
   1  16  -2    0.38    0.53 
  -1 -16   2    0.37    0.46 
   0  16  -2    1.84    0.47 
   0  16  -2    2.17    0.64 
   0 -16   2    0.99    0.46 
  -1  16  -2   -0.20    0.38 
  -1  16  -2    0.36    0.32 
  -2  16  -2    0.17    0.31 
  -2  16  -2    0.28    0.39 
  -3  16  -2    1.74    0.54 
  -3  16  -2    0.56    0.39 
  -4  16  -2   -0.42    0.31 
  -5  16  -2   -0.02    0.37 
  -6  16  -2    0.17    0.45 
  -7  16  -2    0.55    0.61 
  -5 -15   2    1.07    0.79 
  -4 -15   2    1.08    0.70 
   3  15  -2   -0.02    0.55 
  -3 -15   2   -0.29    0.47 
   2  15  -2    0.21    0.48 
  -2 -15   2    0.15    0.46 
   1  15  -2    0.11    0.39 
   1  15  -2    0.00    0.38 
  -1 -15   2    0.09    0.39 
   0  15  -2    0.11    0.38 
   0  15  -2    0.33    0.28 
   0 -15   2    0.82    0.44 
  -1  15  -2    5.09    0.67 
  -1  15  -2    5.68    0.82 
  -2  15  -2    0.45    0.36 
  -2  15  -2   -0.15    0.27 
  -3  15  -2    2.65    0.55 
  -3  15  -2    1.56    0.50 
  -4  15  -2    0.28    0.40 
  -4  15  -2    0.24    0.34 
  -5  15  -2    0.55    0.43 
  -6  15  -2    0.12    0.39 
  -7  15  -2    0.34    0.46 
  -6 -14   2    0.19    0.76 
  -5 -14   2   -0.05    0.57 
  -4 -14   2    0.04    0.52 
   3  14  -2   -0.04    0.47 
  -3 -14   2    1.01    0.55 
   2  14  -2    0.37    0.47 
  -2 -14   2    0.07    0.44 
   1  14  -2   -0.50    0.34 
   1  14  -2    0.05    0.26 
  -1 -14   2    0.08    0.39 
   0  14  -2   -0.03    0.24 
   0  14  -2    0.07    0.31 
   0 -14   2    0.38    0.35 
  -1  14  -2    2.44    0.52 
  -1  14  -2    1.77    0.42 
   1 -14   2    2.35    0.45 
  -2  14  -2    4.03    0.63 
  -2  14  -2    3.64    0.66 
  -3  14  -2    0.48    0.35 
  -3  14  -2    0.33    0.34 
  -4  14  -2    1.14    0.44 
  -4  14  -2    0.89    0.41 
  -5  14  -2    0.02    0.37 
  -5  14  -2    0.25    0.35 
  -6  14  -2    1.12    0.53 
  -7  14  -2    0.52    0.46 
  -8  14  -2   -0.03    0.50 
  -6 -13   2   -0.48    0.54 
  -5 -13   2   -0.52    0.45 
  -4 -13   2    0.12    0.44 
   3  13  -2   -0.32    0.41 
  -3 -13   2    0.61    0.45 
   2  13  -2    0.20    0.35 
  -2 -13   2   -0.13    0.38 
   1  13  -2   -0.08    0.22 
   1  13  -2    0.30    0.36 
  -1 -13   2    0.71    0.41 
   0  13  -2    3.74    0.66 
   0  13  -2    5.81    0.61 
   0 -13   2    4.70    0.65 
  -1  13  -2   -0.07    0.21 
  -1  13  -2    0.10    0.27 
   1 -13   2   -0.03    0.25 
  -2  13  -2    0.38    0.28 
  -2  13  -2   -0.02    0.21 
  -3  13  -2    1.24    0.37 
  -3  13  -2    1.60    0.45 
  -4  13  -2    1.69    0.48 
  -4  13  -2    1.13    0.40 
  -5  13  -2    0.11    0.32 
  -5  13  -2    0.26    0.34 
  -6  13  -2    3.82    0.74 
  -6  13  -2    2.54    0.55 
  -7  13  -2    0.63    0.52 
  -8  13  -2    0.23    0.50 
  -6 -12   2   -0.31    0.49 
  -5 -12   2   -0.27    0.41 
  -4 -12   2   -0.34    0.36 
   3  12  -2    1.87    0.59 
  -3 -12   2    2.24    0.62 
   2  12  -2    0.98    0.48 
  -2 -12   2    1.46    0.50 
   1  12  -2    0.06    0.19 
   1  12  -2    1.37    0.44 
  -1 -12   2    1.15    0.42 
   0  12  -2    2.00    0.44 
   0  12  -2    1.44    0.32 
   0 -12   2    1.37    0.39 
  -1  12  -2    7.72    0.78 
  -1  12  -2    6.92    0.71 
   1 -12   2    7.49    0.69 
  -2  12  -2    0.37    0.26 
  -2  12  -2    0.19    0.25 
   2 -12   2    0.25    0.20 
  -3  12  -2    2.54    0.51 
  -3  12  -2    1.88    0.41 
  -4  12  -2    0.29    0.24 
  -4  12  -2    0.28    0.31 
  -5  12  -2    0.00    0.30 
  -5  12  -2    1.02    0.39 
  -6  12  -2    0.11    0.34 
  -6  12  -2    0.21    0.34 
  -7  12  -2   -0.06    0.44 
  -8  12  -2   -0.28    0.45 
  -7 -11   2    0.07    0.66 
  -6 -11   2   -0.03    0.45 
  -5 -11   2   -0.60    0.36 
  -4 -11   2    1.11    0.47 
   3  11  -2   -0.04    0.34 
  -3 -11   2   -0.25    0.34 
   2  11  -2    2.63    0.61 
  -2 -11   2    2.05    0.53 
   1  11  -2    0.02    0.16 
   1  11  -2    0.47    0.32 
  -1 -11   2    0.53    0.31 
   0  11  -2    0.25    0.23 
   0  11  -2    0.07    0.17 
   0 -11   2    0.11    0.27 
  -1  11  -2    4.43    0.58 
  -1  11  -2    4.99    0.56 
   1 -11   2    4.66    0.51 
  -2  11  -2    3.12    0.47 
  -2  11  -2    2.22    0.43 
   2 -11   2    2.92    0.34 
  -3  11  -2    1.02    0.27 
  -3  11  -2    0.30    0.26 
  -4  11  -2    2.44    0.42 
  -4  11  -2    2.78    0.56 
  -5  11  -2   -0.05    0.24 
  -5  11  -2    0.17    0.31 
  -6  11  -2    1.07    0.50 
  -6  11  -2    1.03    0.39 
  -7  11  -2   -0.08    0.33 
  -7  11  -2   -0.09    0.39 
  -8  11  -2    0.25    0.50 
  -7 -10   2   -0.48    0.61 
  -6 -10   2    1.87    0.76 
  -5 -10   2    3.82    0.76 
  -4 -10   2    5.32    0.85 
   3  10  -2   25.31    2.02 
  -3 -10   2   29.42    1.97 
   2  10  -2    4.67    0.75 
  -2 -10   2    5.20    0.69 
   1  10  -2    0.64    0.21 
   1  10  -2    0.86    0.32 
  -1 -10   2    1.18    0.34 
   0  10  -2    0.07    0.19 
   0  10  -2    0.42    0.21 
   0 -10   2    0.87    0.29 
  -1  10  -2   29.69    1.84 
  -1  10  -2   30.35    1.86 
   1 -10   2   29.53    1.81 
  -2  10  -2   12.11    0.93 
  -2  10  -2   11.09    0.93 
   2 -10   2   13.34    0.82 
  -3  10  -2    9.67    0.78 
  -3  10  -2    9.72    0.92 
  -4  10  -2    1.13    0.38 
  -4  10  -2    1.69    0.35 
  -5  10  -2   14.48    1.12 
  -6  10  -2    0.38    0.30 
  -7  10  -2    1.05    0.46 
  -8  10  -2   -0.14    0.43 
  -7  -9   2   -0.22    0.64 
  -6  -9   2    0.73    0.59 
  -5  -9   2    0.41    0.39 
  -4  -9   2   31.40    2.18 
   3   9  -2    0.85    0.42 
  -3  -9   2    1.17    0.41 
   2   9  -2    0.12    0.23 
  -2  -9   2    0.18    0.23 
   1   9  -2   11.14    0.83 
   1   9  -2   13.20    1.00 
  -1  -9   2   11.99    0.93 
   0   9  -2    0.00    0.15 
   0   9  -2    0.08    0.20 
   0  -9   2    0.32    0.22 
  -1   9  -2    1.32    0.30 
  -1   9  -2    1.05    0.25 
   1  -9   2    1.32    0.27 
  -2   9  -2   12.29    0.92 
  -2   9  -2   12.84    0.97 
   2  -9   2   13.61    0.83 
  -3   9  -2   -0.04    0.19 
  -3   9  -2    0.58    0.22 
   3  -9   2    0.34    0.15 
  -4   9  -2    0.35    0.19 
  -5   9  -2    0.22    0.26 
  -6   9  -2    5.22    0.69 
  -7   9  -2    0.39    0.39 
  -8   9  -2    0.98    0.51 
  -8  -8   2   -0.01    0.65 
  -7  -8   2    0.11    0.54 
  -6  -8   2    0.49    0.51 
  -5  -8   2    8.62    1.03 
  -4  -8   2    0.15    0.27 
   3   8  -2   -0.15    0.26 
  -3  -8   2   -0.02    0.24 
   2   8  -2    2.55    0.50 
  -2  -8   2    1.64    0.38 
   1   8  -2    7.49    0.74 
   1   8  -2    6.30    0.53 
  -1  -8   2    7.02    0.66 
   0   8  -2   17.21    1.17 
   0   8  -2   18.97    1.10 
   0  -8   2   15.65    1.11 
  -1   8  -2   27.01    1.64 
  -1   8  -2   26.17    1.63 
   1  -8   2   27.23    1.60 
  -2   8  -2   20.69    1.40 
  -2   8  -2   20.36    1.35 
   2  -8   2   23.11    1.27 
  -3   8  -2    6.26    0.60 
  -4   8  -2    8.96    0.73 
  -5   8  -2    0.61    0.26 
  -6   8  -2    3.47    0.56 
  -7   8  -2    0.50    0.38 
  -8   8  -2    0.21    0.43 
  -9   8  -2    0.29    0.55 
  -8  -7   2   -0.01    0.67 
  -7  -7   2    0.72    0.58 
  -6  -7   2    6.44    0.95 
  -5  -7   2   11.88    1.20 
  -4  -7   2    0.74    0.35 
   3   7  -2    1.86    0.50 
  -3  -7   2    2.33    0.46 
   2   7  -2    1.08    0.34 
  -2  -7   2    0.45    0.22 
   1   7  -2   57.00    3.28 
   1   7  -2   59.67    3.43 
  -1  -7   2   61.51    3.43 
   0   7  -2   27.80    1.79 
   0   7  -2   33.40    1.75 
   0  -7   2   28.25    1.77 
  -1   7  -2  116.86    6.43 
  -1   7  -2  120.90    6.48 
   1  -7   2  118.10    6.49 
  -2   7  -2    1.81    0.29 
   2  -7   2    1.38    0.16 
  -3   7  -2   10.57    0.80 
   3  -7   2   11.16    0.68 
  -4   7  -2    3.53    0.48 
  -5   7  -2    4.37    0.55 
  -6   7  -2    2.57    0.53 
  -7   7  -2    1.87    0.52 
  -8   7  -2    0.72    0.48 
  -9   7  -2    0.33    0.56 
  -8  -6   2    0.26    0.65 
  -7  -6   2    0.42    0.50 
  -6  -6   2    0.26    0.43 
  -5  -6   2    0.22    0.33 
  -4  -6   2    6.10    0.75 
   3   6  -2    0.14    0.21 
  -3  -6   2   -0.05    0.18 
   2   6  -2    0.59    0.29 
  -2  -6   2    0.95    0.28 
   1   6  -2    0.36    0.20 
   1   6  -2    0.34    0.15 
  -1  -6   2    0.28    0.17 
   0   6  -2    6.78    0.50 
   0   6  -2    5.50    0.42 
   0  -6   2    4.68    0.42 
  -1   6  -2    0.73    0.18 
  -1   6  -2    0.83    0.19 
   1  -6   2    0.65    0.15 
  -2   6  -2   24.73    1.49 
  -3   6  -2   14.72    1.00 
   3  -6   2   14.56    0.88 
  -4   6  -2    6.42    0.58 
  -4   6  -2    4.53    0.39 
  -5   6  -2   16.40    1.05 
  -5   6  -2   15.88    1.15 
  -6   6  -2   12.91    1.07 
  -7   6  -2    2.09    0.54 
  -8   6  -2    0.77    0.51 
  -9   6  -2    0.63    0.63 
  -8  -5   2    0.94    0.63 
  -7  -5   2    0.39    0.50 
  -6  -5   2    0.18    0.36 
  -5  -5   2    0.26    0.31 
  -4  -5   2    3.60    0.58 
  -3  -5   2    0.04    0.17 
   2   5  -2   17.34    1.22 
  -2  -5   2   16.36    1.14 
   1   5  -2    0.56    0.20 
   1   5  -2    0.39    0.12 
  -1  -5   2    0.37    0.17 
   0   5  -2   23.69    1.41 
  -1   5  -2   26.99    1.61 
   1  -5   2   28.38    1.56 
  -2   5  -2    9.75    0.68 
  -3   5  -2    0.38    0.11 
  -3   5  -2    0.14    0.14 
  -4   5  -2   -0.06    0.15 
  -4   5  -2   -0.05    0.12 
  -5   5  -2    0.43    0.21 
  -5   5  -2    0.06    0.19 
  -6   5  -2    0.14    0.30 
  -7   5  -2    0.07    0.37 
  -8   5  -2    0.34    0.46 
  -9   5  -2    0.99    0.70 
  -9  -4   2    1.13    0.73 
  -8  -4   2    0.05    0.53 
  -7  -4   2    0.35    0.44 
  -6  -4   2    2.24    0.55 
  -5  -4   2    0.33    0.34 
  -4  -4   2    5.59    0.67 
  -3  -4   2   24.68    1.61 
   2   4  -2    0.04    0.17 
  -2  -4   2    0.17    0.18 
   1   4  -2    6.31    0.54 
   1   4  -2    6.50    0.43 
  -1  -4   2    6.80    0.52 
   0   4  -2    0.15    0.11 
   0   4  -2   -0.03    0.04 
   0  -4   2   -0.03    0.05 
  -1   4  -2   38.85    2.25 
   1  -4   2   41.55    2.22 
  -2   4  -2    3.24    0.36 
  -3   4  -2    3.85    0.31 
  -3   4  -2    4.40    0.44 
  -4   4  -2   49.05    2.78 
  -4   4  -2   48.08    2.84 
  -5   4  -2    0.71    0.24 
  -5   4  -2    1.12    0.29 
  -6   4  -2    0.89    0.38 
  -6   4  -2    1.24    0.31 
  -7   4  -2    0.31    0.36 
  -8   4  -2    0.06    0.40 
  -9   4  -2    2.43    0.76 
  -9  -3   2   -0.36    0.64 
  -8  -3   2   -0.21    0.50 
  -7  -3   2    0.46    0.47 
  -6  -3   2   -0.20    0.33 
  -5  -3   2    7.80    0.87 
  -4  -3   2   16.41    1.22 
   3   3  -2   -0.01    0.18 
   2   3  -2    0.16    0.18 
   2   3  -2    0.02    0.12 
   1   3  -2   19.00    1.20 
   1   3  -2   18.38    1.15 
   0   3  -2    2.54    0.27 
  -1   3  -2    3.45    0.31 
  -2   3  -2    7.11    0.52 
  -2   3  -2    7.15    0.44 
  -3   3  -2    0.46    0.18 
  -3   3  -2    0.52    0.15 
  -4   3  -2    0.97    0.28 
  -4   3  -2    0.93    0.22 
  -5   3  -2    2.56    0.45 
  -5   3  -2    2.56    0.39 
  -6   3  -2    0.96    0.34 
  -6   3  -2    0.78    0.36 
  -7   3  -2    0.30    0.36 
  -8   3  -2   -0.14    0.46 
  -9   3  -2    0.02    0.53 
  -9  -2   2    0.18    0.67 
  -8  -2   2   -0.21    0.46 
  -7  -2   2    1.60    0.56 
  -6  -2   2   -0.19    0.30 
  -5  -2   2    0.60    0.31 
   4   2  -2   20.68    1.54 
   3   2  -2   39.82    2.50 
   2   2  -2    5.25    0.56 
   2   2  -2    5.65    0.54 
   1   2  -2  374.09   20.26 
   1   2  -2  373.22   19.79 
   0   2  -2  401.94   20.81 
   0   2  -2  386.36   21.30 
  -1   2  -2   75.90    4.14 
  -1   2  -2   76.03    4.10 
  -2   2  -2    0.16    0.10 
  -2   2  -2   -0.03    0.09 
  -3   2  -2    0.85    0.18 
  -3   2  -2    0.74    0.22 
  -4   2  -2   41.13    2.49 
  -4   2  -2   44.45    2.55 
  -5   2  -2    0.58    0.27 
  -5   2  -2    0.50    0.25 
  -6   2  -2    1.52    0.45 
  -6   2  -2    2.21    0.43 
  -7   2  -2   -0.08    0.37 
  -7   2  -2    0.56    0.40 
  -8   2  -2    1.39    0.59 
  -9   2  -2    0.32    0.58 
  -9  -1   2   -0.36    0.61 
  -8  -1   2   -0.38    0.43 
  -7  -1   2    5.47    0.86 
  -6  -1   2   -0.20    0.27 
   5   1  -2    4.74    0.74 
   4   1  -2    2.83    0.53 
   3   1  -2   21.27    1.47 
   2   1  -2  135.02    7.50 
   1   1  -2    2.07    0.23 
   1   1  -2    2.42    0.28 
  -1  -1   2    2.26    0.15 
   0   1  -2   36.91    2.12 
   0   1  -2   39.29    2.07 
  -1   1  -2  282.29   15.23 
  -1   1  -2  280.99   14.91 
  -2   1  -2   17.39    1.12 
  -2   1  -2   19.43    1.11 
  -3   1  -2  108.47    6.00 
  -4   1  -2    0.43    0.20 
  -5   1  -2    3.27    0.46 
  -6   1  -2    2.72    0.50 
  -7   1  -2    2.61    0.59 
  -8   1  -2    0.84    0.58 
  -9   1  -2    0.62    0.62 
  -9   0   2   -0.55    0.54 
  -8   0   2    2.79    0.75 
  -7   0   2    2.80    0.62 
  -6   0   2   -0.06    0.29 
   5   0  -2    0.11    0.27 
   4   0  -2    0.01    0.23 
   3   0  -2    4.53    0.57 
   2   0  -2  126.63    7.03 
   1   0  -2    1.52    0.22 
  -1   0   2    1.56    0.14 
   0   0  -2   -0.02    0.11 
   0   0  -2    0.02    0.13 
  -1   0  -2  352.69   19.06 
  -2   0  -2   21.31    1.29 
  -3   0  -2    0.15    0.16 
  -4   0  -2   10.90    0.83 
  -5   0  -2    1.62    0.37 
  -6   0  -2    0.41    0.34 
  -7   0  -2   -0.07    0.37 
  -8   0  -2   -0.03    0.54 
  -9   0  -2    0.56    0.64 
  -9   1   2    0.45    0.66 
  -8   1   2    0.42    0.50 
  -7   1   2    1.74    0.53 
   6  -1  -2   10.40    1.18 
   5  -1  -2    1.12    0.39 
   4  -1  -2    0.57    0.31 
   3  -1  -2   59.17    3.48 
   2  -1  -2  900.05   48.60 
   1  -1  -2  599.42   31.78 
  -1   1   2  577.71   31.19 
   0  -1  -2  127.26    6.92 
  -1  -1  -2  130.03    7.11 
  -2  -1  -2   94.00    5.22 
  -3  -1  -2    6.52    0.57 
  -4  -1  -2    2.84    0.45 
  -5  -1  -2    3.03    0.51 
  -6  -1  -2    5.36    0.74 
  -7  -1  -2    0.03    0.43 
  -8  -1  -2   -0.33    0.50 
  -9   2   2    0.41    0.60 
  -8   2   2    3.72    0.75 
  -7   2   2   -0.38    0.29 
   6  -2  -2    0.65    0.37 
   5  -2  -2    0.05    0.23 
   4  -2  -2   36.48    2.32 
   3  -2  -2   18.26    1.25 
   2  -2  -2    1.25    0.27 
  -2   2   2    1.72    0.25 
   1  -2  -2  900.68   48.65 
  -1   2   2  924.30   48.00 
  -1   2   2  884.10   47.79 
   0  -2  -2  437.65   24.20 
   0   2   2  458.74   23.80 
  -1  -2  -2    1.20    0.25 
  -2  -2  -2   55.48    3.18 
  -3  -2  -2    4.13    0.50 
  -4  -2  -2   50.32    3.01 
  -5  -2  -2    0.05    0.26 
  -6  -2  -2   -0.22    0.35 
  -7  -2  -2    0.16    0.43 
  -8  -2  -2    0.26    0.54 
  -9   3   2    0.13    0.51 
  -8   3   2    0.41    0.46 
  -8   3   2    0.70    0.48 
   6  -3  -2    7.96    0.98 
   5  -3  -2    3.73    0.63 
   4  -3  -2   32.61    2.10 
   3  -3  -2    3.33    0.45 
   2  -3  -2  597.15   31.71 
  -2   3   2  576.32   31.15 
  -2   3   2  585.63   30.90 
   1  -3  -2  253.75   13.49 
  -1   3   2  244.60   13.26 
  -1   3   2  247.29   13.17 
   0   3   2  689.24   36.56 
  -1  -3  -2    0.95    0.25 
  -2  -3  -2   16.91    1.13 
  -3  -3  -2   25.80    1.67 
  -4  -3  -2    0.41    0.30 
  -5  -3  -2    6.13    0.79 
  -6  -3  -2    0.20    0.39 
  -7  -3  -2    0.04    0.46 
  -8  -3  -2    0.48    0.63 
  -9   4   2    0.29    0.55 
  -8   4   2    0.39    0.40 
   7  -4  -2    0.43    0.45 
  -7   4   2    2.17    0.52 
   6  -4  -2   -0.16    0.27 
  -6   4   2    0.61    0.29 
   5  -4  -2   14.96    1.19 
   4  -4  -2    3.27    0.50 
  -4   4   2    3.39    0.39 
   3  -4  -2   21.22    1.38 
  -3   4   2   20.29    1.34 
  -3   4   2   21.69    1.25 
   2  -4  -2   20.27    1.33 
  -2   4   2   22.58    1.23 
  -2   4   2   21.99    1.33 
   1  -4  -2   64.08    3.57 
  -1   4   2   64.32    3.53 
  -1   4   2   63.29    3.42 
   0  -4  -2    0.73    0.22 
   0   4   2    0.59    0.17 
   0   4   2    0.95    0.20 
  -1  -4  -2    0.89    0.25 
  -2  -4  -2   78.14    4.46 
  -3  -4  -2   58.83    3.48 
  -4  -4  -2   50.21    3.07 
  -5  -4  -2    4.22    0.68 
  -6  -4  -2    0.96    0.50 
  -7  -4  -2    0.74    0.54 
  -8  -4  -2   -0.49    0.56 
  -8   5   2   -0.09    0.37 
   7  -5  -2   -0.13    0.42 
  -7   5   2   -0.40    0.29 
   6  -5  -2    0.24    0.33 
  -6   5   2    0.14    0.23 
   5  -5  -2    3.71    0.59 
  -5   5   2    2.96    0.43 
   4  -5  -2    6.83    0.69 
  -4   5   2    6.98    0.68 
  -4   5   2    6.26    0.52 
   3  -5  -2   -0.01    0.13 
  -3   5   2    0.04    0.12 
  -3   5   2   -0.17    0.14 
   2  -5  -2    9.45    0.70 
  -2   5   2   10.44    0.73 
  -2   5   2   10.34    0.62 
   1  -5  -2   23.94    1.50 
  -1   5   2   23.67    1.50 
  -1   5   2   27.34    1.42 
   0  -5  -2    3.45    0.41 
   0   5   2    4.15    0.39 
   0   5   2    4.28    0.41 
  -1  -5  -2   17.96    1.21 
  -2  -5  -2    0.91    0.30 
  -3  -5  -2    0.43    0.30 
  -4  -5  -2    6.07    0.78 
  -5  -5  -2    0.61    0.47 
  -6  -5  -2    0.93    0.53 
  -7  -5  -2    2.44    0.71 
  -8  -5  -2    0.40    0.72 
  -9   6   2    0.35    0.62 
  -8   6   2    0.47    0.42 
  -8   6   2    0.27    0.41 
  -7   6   2    1.46    0.44 
   6  -6  -2    1.29    0.43 
  -6   6   2    3.28    0.60 
  -6   6   2    3.72    0.50 
  -5   6   2    5.61    0.55 
  -5   6   2    5.03    0.68 
  -4   6   2    5.84    0.49 
  -4   6   2    5.86    0.64 
  -3   6   2   13.94    1.00 
  -3   6   2   14.02    0.88 
   2  -6  -2    0.08    0.12 
  -2   6   2    0.22    0.11 
  -2   6   2    0.30    0.18 
   1  -6  -2    7.38    0.57 
  -1   6   2    6.38    0.56 
  -1   6   2    8.32    0.53 
   0  -6  -2   23.06    1.50 
   0   6   2   22.75    1.45 
   0   6   2   26.17    1.49 
  -1  -6  -2   -0.07    0.18 
  -2  -6  -2    1.32    0.36 
  -3  -6  -2    0.70    0.35 
  -4  -6  -2    4.36    0.70 
  -5  -6  -2    9.65    1.08 
  -6  -6  -2   -0.39    0.44 
  -7  -6  -2    0.53    0.59 
  -8  -6  -2    0.20    0.70 
  -9   7   2    0.40    0.54 
  -8   7   2    0.53    0.49 
  -7   7   2    0.37    0.33 
  -7   7   2    0.57    0.43 
   6  -7  -2    3.98    0.68 
  -6   7   2    4.50    0.54 
  -6   7   2    4.36    0.71 
   5  -7  -2   18.23    1.35 
  -5   7   2   18.58    1.20 
  -5   7   2   18.29    1.36 
   4  -7  -2   24.45    1.70 
  -4   7   2   27.75    1.59 
  -4   7   2   27.16    1.76 
  -3   7   2   14.30    1.05 
  -3   7   2   14.65    0.91 
   2  -7  -2    0.44    0.17 
  -2   7   2    1.03    0.26 
  -2   7   2    1.10    0.18 
   1  -7  -2   14.53    1.00 
  -1   7   2   17.33    0.97 
  -1   7   2   13.62    1.01 
   0  -7  -2   21.45    1.45 
   0   7   2   24.32    1.43 
   0   7   2   21.64    1.41 
  -1  -7  -2   33.92    2.12 
  -2  -7  -2    3.13    0.56 
  -3  -7  -2    0.33    0.35 
  -4  -7  -2   17.76    1.46 
  -5  -7  -2    3.15    0.71 
  -6  -7  -2    2.24    0.69 
  -7  -7  -2    0.36    0.65 
  -8  -7  -2   -0.46    0.64 
  -9   8   2    0.33    0.50 
  -8   8   2    0.75    0.49 
  -7   8   2    0.49    0.40 
  -6   8   2    0.55    0.36 
  -6   8   2    0.23    0.19 
   5  -8  -2    3.04    0.50 
  -5   8   2    2.11    0.48 
  -5   8   2    1.75    0.33 
   4  -8  -2    5.63    0.61 
  -4   8   2    5.25    0.66 
   3  -8  -2    4.85    0.53 
  -3   8   2    5.55    0.63 
  -3   8   2    5.97    0.45 
   2  -8  -2   14.34    0.98 
  -2   8   2   15.61    0.92 
  -2   8   2   13.38    1.03 
   1  -8  -2    4.28    0.48 
  -1   8   2    5.13    0.46 
  -1   8   2    4.62    0.52 
   0  -8  -2    3.19    0.47 
   0   8   2    3.46    0.45 
   0   8   2    2.98    0.42 
  -1  -8  -2   10.64    0.93 
   1   8   2   11.54    0.93 
   1   8   2   11.25    0.89 
  -2  -8  -2    0.67    0.35 
  -3  -8  -2    1.18    0.45 
  -4  -8  -2    0.38    0.49 
  -5  -8  -2    2.82    0.71 
  -6  -8  -2    0.44    0.60 
  -7  -8  -2   -0.16    0.65 
  -9   9   2    0.25    0.56 
  -8   9   2    0.31    0.47 
  -7   9   2    0.82    0.46 
  -6   9   2    0.73    0.40 
   5  -9  -2   -0.06    0.26 
  -5   9   2    0.23    0.28 
  -5   9   2   -0.06    0.18 
   4  -9  -2    0.11    0.20 
  -4   9   2    0.39    0.29 
   3  -9  -2    0.59    0.23 
  -3   9   2    0.09    0.22 
  -3   9   2    0.82    0.20 
   2  -9  -2    0.05    0.13 
  -2   9   2    0.16    0.14 
  -2   9   2    0.03    0.17 
   1  -9  -2    0.63    0.23 
  -1   9   2    0.16    0.19 
  -1   9   2    0.40    0.20 
   0  -9  -2    6.25    0.68 
   0   9   2    7.53    0.69 
   0   9   2    6.13    0.64 
  -1  -9  -2    3.47    0.58 
   1   9   2    2.72    0.47 
   1   9   2    3.55    0.56 
  -2  -9  -2    1.68    0.49 
  -3  -9  -2   11.12    1.16 
  -4  -9  -2    1.24    0.57 
  -5  -9  -2    0.61    0.60 
  -6  -9  -2   -0.47    0.54 
  -7  -9  -2    0.26    0.73 
  -9  10   2    0.96    0.66 
  -8  10   2   -0.16    0.45 
  -7  10   2    0.00    0.40 
  -6  10   2    0.78    0.40 
  -5  10   2    0.20    0.18 
  -5  10   2    0.34    0.31 
   4 -10  -2    0.18    0.21 
  -4  10   2    0.22    0.27 
  -4  10   2    0.65    0.22 
   3 -10  -2    5.06    0.53 
  -3  10   2    4.77    0.64 
  -3  10   2    3.84    0.43 
   2 -10  -2    2.12    0.36 
  -2  10   2    2.10    0.40 
  -2  10   2    3.23    0.38 
   1 -10  -2    1.52    0.35 
  -1  10   2    1.70    0.34 
  -1  10   2    1.77    0.35 
   0 -10  -2    4.32    0.59 
   0  10   2    5.07    0.59 
   0  10   2    4.64    0.60 
  -1 -10  -2    1.73    0.48 
   1  10   2    1.65    0.41 
   1  10   2    2.52    0.49 
  -2 -10  -2    0.18    0.43 
  -3 -10  -2    0.19    0.41 
  -4 -10  -2    1.57    0.58 
  -5 -10  -2    0.11    0.57 
  -6 -10  -2   -0.76    0.61 
  -7 -10  -2    0.02    0.71 
  -9  11   2    0.02    0.53 
  -8  11   2    0.03    0.46 
  -7  11   2    0.02    0.41 
  -6  11   2    1.06    0.45 
  -5  11   2    3.44    0.66 
   4 -11  -2    6.77    0.72 
  -4  11   2    7.36    0.60 
  -4  11   2    6.47    0.83 
   3 -11  -2    2.22    0.38 
  -3  11   2    2.25    0.47 
  -3  11   2    2.14    0.35 
   2 -11  -2    0.85    0.28 
  -2  11   2    0.70    0.30 
  -2  11   2    1.33    0.30 
   1 -11  -2    1.19    0.34 
  -1  11   2    1.84    0.36 
  -1  11   2    1.32    0.33 
   0 -11  -2   13.48    1.10 
   0  11   2   13.42    1.07 
   0  11   2   13.95    1.06 
  -1 -11  -2    6.11    0.83 
   1  11   2    7.29    0.83 
   1  11   2    5.58    0.73 
  -2 -11  -2    7.42    0.96 
  -3 -11  -2   -0.05    0.42 
  -4 -11  -2    0.24    0.45 
  -5 -11  -2   -0.82    0.49 
  -6 -11  -2   -0.43    0.67 
  -8  12   2    0.11    0.49 
  -7  12   2    0.63    0.51 
  -6  12   2    0.80    0.45 
  -5  12   2    2.98    0.64 
  -4  12   2    0.67    0.36 
   3 -12  -2    3.52    0.51 
  -3  12   2    3.34    0.45 
  -3  12   2    2.52    0.52 
   2 -12  -2    1.41    0.33 
  -2  12   2    1.02    0.31 
  -2  12   2    0.77    0.32 
   1 -12  -2    9.35    0.87 
  -1  12   2    8.96    0.87 
  -1  12   2    9.45    0.81 
   0 -12  -2    2.18    0.51 
   0  12   2    2.70    0.52 
   0  12   2    2.67    0.50 
  -1 -12  -2    3.30    0.67 
   1  12   2    2.23    0.53 
   1  12   2    2.86    0.57 
  -2 -12  -2    1.88    0.59 
  -3 -12  -2    0.43    0.44 
  -4 -12  -2   -0.35    0.43 
  -5 -12  -2    0.24    0.53 
  -6 -12  -2   -0.31    0.70 
  -8  13   2    0.56    0.56 
  -7  13   2    0.67    0.50 
  -6  13   2   -0.30    0.38 
  -5  13   2    0.83    0.46 
  -4  13   2    1.15    0.44 
   3 -13  -2    0.08    0.24 
  -3  13   2   -0.35    0.23 
   2 -13  -2    2.66    0.44 
  -2  13   2    0.92    0.38 
  -2  13   2    2.20    0.43 
   1 -13  -2    4.39    0.62 
  -1  13   2    5.06    0.63 
  -1  13   2    2.75    0.53 
   0 -13  -2   38.95    2.50 
   0  13   2   35.32    2.44 
   0  13   2   39.97    2.45 
  -1 -13  -2    2.26    0.61 
   1  13   2    2.83    0.58 
   1  13   2    2.99    0.69 
  -2 -13  -2    1.29    0.53 
  -3 -13  -2    1.04    0.57 
  -4 -13  -2    0.34    0.52 
  -5 -13  -2    0.48    0.66 
  -6 -13  -2   -0.10    0.65 
  -8  14   2   -0.14    0.48 
  -7  14   2   -0.47    0.44 
  -6  14   2    0.77    0.54 
  -5  14   2   -0.24    0.33 
  -4  14   2   -0.10    0.31 
  -3  14   2    1.48    0.43 
   2 -14  -2    0.84    0.29 
  -2  14   2    1.00    0.36 
   1 -14  -2   16.46    1.28 
  -1  14   2   18.67    1.30 
  -1  14   2   14.37    1.26 
   0 -14  -2    0.78    0.42 
   0  14   2    0.71    0.38 
   0  14   2    0.96    0.39 
  -1 -14  -2    0.49    0.44 
  -2 -14  -2   -0.37    0.36 
  -3 -14  -2    0.72    0.56 
  -4 -14  -2    0.55    0.55 
  -5 -14  -2    0.79    0.71 
  -7  15   2   -0.31    0.52 
  -6  15   2   -0.61    0.44 
  -5  15   2    0.50    0.45 
  -4  15   2    1.89    0.54 
  -3  15   2    1.26    0.44 
   2 -15  -2   -0.05    0.28 
  -2  15   2    0.76    0.33 
   1 -15  -2    0.73    0.37 
  -1  15   2    0.83    0.37 
   0 -15  -2    0.11    0.36 
   0  15   2    0.05    0.30 
   0  15   2    0.37    0.42 
  -1 -15  -2    0.79    0.44 
  -2 -15  -2    1.25    0.60 
  -3 -15  -2    0.05    0.46 
  -4 -15  -2    0.31    0.63 
  -5 -15  -2   -0.48    0.70 
  -7  16   2   -0.26    0.47 
  -6  16   2    0.77    0.49 
  -5  16   2    0.43    0.41 
  -4  16   2    1.09    0.49 
  -3  16   2   -0.34    0.30 
  -2  16   2    0.05    0.28 
   1 -16  -2    4.43    0.69 
  -1  16   2    2.64    0.55 
   0 -16  -2    0.86    0.45 
   0  16   2    1.22    0.46 
   0  16   2    0.31    0.56 
  -1 -16  -2    1.65    0.58 
  -2 -16  -2    0.21    0.46 
  -3 -16  -2    0.47    0.61 
  -4 -16  -2    2.01    0.88 
  -7  17   2    0.13    0.57 
  -6  17   2    0.29    0.53 
  -5  17   2    0.39    0.45 
  -4  17   2   -0.22    0.36 
  -3  17   2    0.62    0.39 
  -2  17   2    0.39    0.38 
   1 -17  -2    0.60    0.44 
  -1  17   2    0.28    0.35 
   0 -17  -2    0.11    0.42 
   0  17   2   -0.27    0.34 
  -1 -17  -2    0.55    0.49 
  -2 -17  -2    0.63    0.55 
  -3 -17  -2    0.24    0.60 
  -4 -17  -2    0.84    0.77 
  -6  18   2    0.45    0.60 
  -5  18   2   -0.34    0.43 
  -4  18   2    0.29    0.42 
  -3  18   2    0.54    0.44 
  -2  18   2    0.46    0.43 
  -1  18   2    0.75    0.44 
   0 -18  -2    0.10    0.40 
   0  18   2    0.18    0.44 
  -1 -18  -2    0.11    0.50 
  -2 -18  -2   -0.10    0.53 
  -3 -18  -2    0.64    0.75 
  -5  19   2    0.03    0.55 
  -4  19   2    0.05    0.47 
  -3  19   2    0.72    0.47 
  -2  19   2   -0.15    0.39 
  -1  19   2    0.44    0.47 
   0 -19  -2    0.92    0.62 
   0  19   2    0.91    0.52 
  -1 -19  -2    0.65    0.57 
  -2 -19  -2    0.52    0.64 
  -4  20   2    0.20    0.53 
  -3  20   2   -0.35    0.43 
  -2  20   2    0.09    0.47 
  -1  20   2    0.20    0.48 
   0  20   2   -0.03    0.64 
  -1 -20  -2    0.09    0.71 
  -2  21   2    0.24    0.61 
   1  20  -3   -0.07    0.73 
   0  20  -3    0.91    0.74 
  -3  20  -3   -0.14    0.46 
  -4  20  -3   -0.12    0.49 
   2  19  -3    0.44    0.76 
   1  19  -3   -0.18    0.65 
   0  19  -3    0.00    0.63 
  -1  19  -3    0.30    0.61 
  -2  19  -3    0.02    0.45 
  -3  19  -3    0.02    0.45 
  -4  19  -3    1.29    0.59 
  -5  19  -3   -0.30    0.49 
  -3 -18   3   -0.24    0.64 
   2  18  -3   -0.18    0.61 
  -2 -18   3    0.56    0.63 
   1  18  -3    0.49    0.63 
   0  18  -3    0.66    0.57 
  -1  18  -3    0.88    0.45 
  -1  18  -3    1.04    0.60 
  -2  18  -3    0.25    0.43 
  -2  18  -3    0.53    0.57 
  -3  18  -3   -0.24    0.33 
  -4  18  -3    0.97    0.55 
  -5  18  -3    0.24    0.50 
  -6  18  -3    0.09    0.55 
  -4 -17   3    0.35    0.75 
   3  17  -3    1.94    0.84 
  -3 -17   3    1.80    0.71 
   2  17  -3    0.80    0.68 
  -2 -17   3   -0.23    0.46 
   1  17  -3    0.47    0.55 
  -1 -17   3    1.00    0.54 
   0  17  -3    0.17    0.49 
  -1  17  -3    1.48    0.61 
  -1  17  -3    0.53    0.40 
  -2  17  -3    1.32    0.58 
  -2  17  -3    1.32    0.43 
  -3  17  -3    2.41    0.68 
  -3  17  -3    1.95    0.57 
  -4  17  -3    0.61    0.45 
  -5  17  -3    0.39    0.45 
  -6  17  -3    0.14    0.47 
  -4 -16   3   -0.08    0.66 
   3  16  -3    0.38    0.65 
  -3 -16   3    0.24    0.55 
   2  16  -3    0.28    0.53 
  -2 -16   3    0.21    0.48 
   1  16  -3    0.54    0.50 
  -1 -16   3    0.67    0.50 
   0  16  -3    1.97    0.61 
   0  16  -3    1.65    0.45 
  -1  16  -3    0.57    0.35 
  -1  16  -3    0.60    0.47 
  -2  16  -3    0.28    0.36 
  -2  16  -3   -0.07    0.33 
  -3  16  -3    0.70    0.42 
  -3  16  -3    0.31    0.34 
  -4  16  -3   -0.07    0.36 
  -4  16  -3    0.12    0.41 
  -5  16  -3    1.06    0.47 
  -6  16  -3   -0.14    0.41 
  -7  16  -3    0.95    0.69 
  -5 -15   3   -0.19    0.66 
  -4 -15   3   -0.23    0.51 
   3  15  -3   -0.39    0.45 
  -3 -15   3   -0.48    0.39 
   2  15  -3    0.13    0.40 
  -2 -15   3    0.33    0.48 
   1  15  -3   -0.20    0.36 
  -1 -15   3    0.24    0.42 
   0  15  -3   -0.29    0.33 
   0  15  -3   -0.11    0.26 
   0 -15   3   -0.10    0.36 
  -1  15  -3    4.62    0.73 
  -1  15  -3    2.92    0.54 
  -2  15  -3    0.79    0.37 
  -2  15  -3    0.16    0.36 
  -3  15  -3    0.70    0.37 
  -3  15  -3    0.45    0.40 
  -4  15  -3    0.83    0.46 
  -4  15  -3    0.66    0.39 
  -5  15  -3    0.04    0.35 
  -5  15  -3    0.12    0.37 
  -6  15  -3    1.21    0.53 
  -7  15  -3   -0.39    0.44 
  -6 -14   3    0.26    0.70 
  -5 -14   3   -0.30    0.52 
  -4 -14   3    0.34    0.48 
   3  14  -3    0.12    0.47 
  -3 -14   3    0.42    0.45 
   2  14  -3    0.17    0.42 
  -2 -14   3   -0.05    0.37 
   1  14  -3    0.20    0.39 
   1  14  -3   -0.28    0.27 
  -1 -14   3   -0.04    0.38 
   0  14  -3    0.15    0.24 
   0  14  -3    0.11    0.34 
   0 -14   3    0.46    0.33 
  -1  14  -3    0.54    0.36 
  -1  14  -3    0.80    0.32 
  -2  14  -3    0.90    0.37 
  -2  14  -3    1.90    0.48 
  -3  14  -3    0.10    0.30 
  -3  14  -3    0.02    0.31 
  -4  14  -3    0.78    0.38 
  -4  14  -3    0.55    0.42 
  -5  14  -3    0.71    0.43 
  -5  14  -3    0.38    0.38 
  -6  14  -3    0.02    0.39 
  -6  14  -3    0.05    0.37 
  -7  14  -3    1.43    0.55 
  -8  14  -3    0.19    0.48 
  -6 -13   3   -0.49    0.54 
  -5 -13   3   -0.14    0.47 
  -4 -13   3    1.37    0.55 
   3  13  -3    0.17    0.43 
  -3 -13   3    0.45    0.42 
   2  13  -3    4.70    0.84 
  -2 -13   3    2.79    0.63 
   1  13  -3   -0.06    0.22 
   1  13  -3   -0.25    0.30 
  -1 -13   3   -0.19    0.31 
   0  13  -3   -0.07    0.21 
   0  13  -3   -0.15    0.23 
   0 -13   3    0.38    0.31 
  -1  13  -3    0.52    0.35 
  -1  13  -3    0.37    0.25 
   1 -13   3    0.47    0.31 
  -2  13  -3    4.24    0.63 
  -2  13  -3    4.37    0.65 
  -3  13  -3    1.07    0.40 
  -3  13  -3    1.39    0.44 
  -4  13  -3   -0.27    0.29 
  -4  13  -3    0.25    0.30 
  -5  13  -3    0.07    0.33 
  -5  13  -3    0.26    0.35 
  -6  13  -3    2.35    0.53 
  -6  13  -3    2.18    0.58 
  -7  13  -3    0.15    0.45 
  -8  13  -3   -0.36    0.47 
  -6 -12   3    0.19    0.56 
  -5 -12   3    0.27    0.42 
  -4 -12   3    0.89    0.49 
   3  12  -3    0.93    0.50 
  -3 -12   3    1.42    0.50 
   2  12  -3    0.00    0.35 
  -2 -12   3    0.78    0.40 
   1  12  -3   -0.26    0.27 
   1  12  -3    0.05    0.20 
  -1 -12   3    0.04    0.29 
   0  12  -3    2.74    0.53 
   0  12  -3    3.41    0.45 
   0 -12   3    2.46    0.46 
  -1  12  -3    5.42    0.69 
  -1  12  -3    5.90    0.64 
   1 -12   3    6.25    0.61 
  -2  12  -3    7.57    0.79 
  -2  12  -3    7.88    0.79 
  -3  12  -3    0.42    0.25 
  -3  12  -3   -0.59    0.19 
  -4  12  -3    0.87    0.39 
  -4  12  -3    1.88    0.45 
  -5  12  -3    2.53    0.59 
  -6  12  -3    0.04    0.36 
  -6  12  -3    0.21    0.37 
  -7  12  -3   -0.14    0.47 
  -7  12  -3   -0.02    0.42 
  -8  12  -3   -0.07    0.51 
  -7 -11   3    0.62    0.70 
  -6 -11   3    0.14    0.47 
  -5 -11   3    0.45    0.47 
  -4 -11   3    0.48    0.42 
   3  11  -3    2.40    0.63 
  -3 -11   3    1.51    0.48 
   2  11  -3    2.12    0.55 
  -2 -11   3    1.44    0.44 
   1  11  -3    4.02    0.65 
   1  11  -3    2.86    0.41 
  -1 -11   3    2.64    0.50 
   0  11  -3    9.55    0.90 
   0  11  -3    9.40    0.73 
   0 -11   3    8.95    0.80 
  -1  11  -3    0.89    0.31 
  -1  11  -3    2.10    0.38 
   1 -11   3    1.83    0.34 
  -2  11  -3   20.23    1.42 
  -2  11  -3   19.91    1.40 
   2 -11   3   21.13    1.26 
  -3  11  -3    7.80    0.84 
  -3  11  -3    8.12    0.78 
  -4  11  -3    4.36    0.61 
  -4  11  -3    4.81    0.71 
  -5  11  -3    2.06    0.51 
  -5  11  -3    2.27    0.48 
  -6  11  -3    3.17    0.60 
  -7  11  -3   -0.21    0.33 
  -8  11  -3   -0.14    0.46 
  -7 -10   3   -0.33    0.57 
  -6 -10   3   -0.43    0.37 
  -5 -10   3    0.95    0.47 
  -4 -10   3    0.51    0.39 
   3  10  -3    0.02    0.37 
  -3 -10   3   -0.11    0.29 
   2  10  -3    1.25    0.47 
  -2 -10   3    2.17    0.45 
   1  10  -3    9.22    0.70 
   1  10  -3    9.47    0.92 
  -1 -10   3    9.46    0.81 
   0  10  -3    0.02    0.18 
   0  10  -3    0.11    0.15 
   0 -10   3    0.25    0.22 
  -1  10  -3    0.72    0.24 
  -1  10  -3    0.79    0.27 
   1 -10   3    0.63    0.23 
  -2  10  -3    6.73    0.69 
  -2  10  -3    7.20    0.73 
   2 -10   3    6.88    0.50 
  -3  10  -3    0.38    0.23 
  -3  10  -3    0.30    0.26 
  -4  10  -3    1.68    0.37 
  -5  10  -3    2.76    0.52 
  -6  10  -3    1.87    0.46 
  -7  10  -3   -0.07    0.36 
  -8  10  -3    1.11    0.59 
  -7  -9   3    0.23    0.62 
  -6  -9   3    1.51    0.65 
  -5  -9   3    1.62    0.51 
  -4  -9   3    5.85    0.80 
   3   9  -3    0.89    0.41 
  -3  -9   3    1.62    0.42 
   2   9  -3    0.18    0.27 
  -2  -9   3    0.23    0.26 
   1   9  -3    0.46    0.25 
   1   9  -3    0.44    0.18 
  -1  -9   3    0.75    0.28 
   0   9  -3    5.73    0.62 
   0   9  -3    5.50    0.47 
   0  -9   3    5.14    0.52 
  -1   9  -3    7.16    0.60 
  -1   9  -3    7.26    0.62 
   1  -9   3    7.00    0.55 
  -2   9  -3    3.38    0.44 
  -2   9  -3    2.91    0.44 
   2  -9   3    3.05    0.26 
  -3   9  -3    0.64    0.25 
  -4   9  -3    1.68    0.35 
  -5   9  -3    0.04    0.24 
  -6   9  -3    3.46    0.60 
  -7   9  -3    0.34    0.40 
  -8   9  -3   -0.10    0.46 
  -9   9  -3    1.11    0.69 
  -8  -8   3    0.35    0.65 
  -7  -8   3    0.35    0.55 
  -5  -8   3   17.04    1.43 
  -4  -8   3   18.12    1.43 
   3   8  -3    7.72    0.94 
  -3  -8   3    7.08    0.80 
   2   8  -3    3.93    0.60 
  -2  -8   3    2.66    0.46 
   1   8  -3    0.02    0.17 
   1   8  -3   -0.01    0.12 
  -1  -8   3    0.08    0.17 
   0   8  -3    6.63    0.63 
  -1   8  -3    4.49    0.47 
  -1   8  -3    3.95    0.47 
   1  -8   3    4.36    0.38 
  -2   8  -3    0.08    0.17 
   2  -8   3    0.35    0.09 
  -3   8  -3    1.49    0.32 
  -4   8  -3    0.08    0.20 
  -5   8  -3    1.90    0.45 
  -6   8  -3    3.41    0.59 
  -7   8  -3   -0.04    0.32 
  -8   8  -3    0.68    0.49 
  -9   8  -3    0.15    0.56 
  -8  -7   3   -0.34    0.60 
  -7  -7   3   -0.17    0.48 
  -6  -7   3    2.99    0.69 
  -5  -7   3    1.24    0.49 
  -4  -7   3    3.44    0.62 
   3   7  -3    0.87    0.36 
  -3  -7   3    0.59    0.27 
   2   7  -3   13.99    1.10 
  -2  -7   3   14.09    1.06 
   1   7  -3   52.00    3.13 
   1   7  -3   53.02    2.99 
  -1  -7   3   57.50    3.16 
   0   7  -3    4.06    0.47 
  -1   7  -3  108.91    5.93 
  -1   7  -3  105.21    5.91 
   1  -7   3  110.38    5.93 
  -2   7  -3   46.36    2.67 
  -3   7  -3    1.36    0.30 
  -4   7  -3    2.54    0.41 
  -5   7  -3    1.75    0.40 
  -6   7  -3    1.27    0.41 
  -7   7  -3    1.19    0.48 
  -8   7  -3    0.46    0.48 
  -9   7  -3   -0.09    0.59 
  -8  -6   3    0.15    0.59 
  -7  -6   3    0.29    0.48 
  -6  -6   3    1.03    0.48 
  -5  -6   3    1.25    0.48 
  -4  -6   3    1.78    0.42 
   3   6  -3    2.94    0.56 
  -3  -6   3    3.27    0.51 
   2   6  -3    2.10    0.43 
  -2  -6   3    1.82    0.36 
   1   6  -3   -0.09    0.11 
   1   6  -3   -0.11    0.14 
  -1  -6   3   -0.13    0.13 
   0   6  -3   32.27    1.83 
  -1   6  -3   18.22    1.20 
   1  -6   3   20.25    1.13 
  -2   6  -3   -0.01    0.12 
  -3   6  -3   10.47    0.81 
  -4   6  -3    7.87    0.53 
  -4   6  -3    7.89    0.68 
  -5   6  -3    3.01    0.51 
  -6   6  -3    2.82    0.55 
  -7   6  -3    0.25    0.34 
  -8   6  -3    0.10    0.44 
  -9   6  -3    1.70    0.72 
  -8  -5   3   -0.37    0.51 
  -7  -5   3    0.73    0.51 
  -6  -5   3    1.67    0.56 
  -5  -5   3    3.50    0.63 
  -4  -5   3    0.55    0.27 
   3   5  -3    6.30    0.74 
  -3  -5   3    4.73    0.61 
   2   5  -3    1.01    0.29 
  -2  -5   3    1.34    0.29 
   1   5  -3   23.90    1.36 
   1   5  -3   24.48    1.51 
  -1  -5   3   24.76    1.49 
   0   5  -3    6.77    0.48 
   0   5  -3    7.56    0.55 
  -1   5  -3  214.14   12.13 
   1  -5   3  240.42   12.32 
  -2   5  -3    0.34    0.17 
  -3   5  -3    0.44    0.12 
  -3   5  -3    0.49    0.19 
  -4   5  -3   51.50    2.87 
  -4   5  -3   47.42    2.76 
  -5   5  -3    1.76    0.30 
  -5   5  -3    1.24    0.37 
  -6   5  -3    9.31    0.99 
  -7   5  -3    0.44    0.40 
  -8   5  -3   -0.26    0.45 
  -9   5  -3    0.55    0.63 
  -9  -4   3    0.21    0.61 
  -8  -4   3    0.09    0.55 
  -7  -4   3    0.40    0.45 
  -6  -4   3    1.96    0.54 
  -5  -4   3    7.29    0.87 
  -4  -4   3    0.31    0.23 
   3   4  -3    8.92    0.85 
   3   4  -3    7.83    0.87 
   2   4  -3   24.65    1.62 
   2   4  -3   26.20    1.69 
   1   4  -3   46.97    2.65 
   1   4  -3   46.58    2.50 
   1   4  -3   45.28    2.72 
   0   4  -3   29.80    1.78 
   0   4  -3   30.93    1.75 
  -1   4  -3    0.90    0.18 
  -2   4  -3   10.62    0.75 
  -3   4  -3   13.17    0.92 
  -3   4  -3   13.56    0.82 
  -4   4  -3    0.04    0.18 
  -4   4  -3    0.15    0.16 
  -5   4  -3    0.19    0.22 
  -5   4  -3    0.44    0.29 
  -6   4  -3    0.15    0.32 
  -7   4  -3   -0.10    0.39 
  -8   4  -3   -0.31    0.43 
  -9   4  -3    2.18    0.80 
  -9  -3   3   -0.34    0.56 
  -8  -3   3    0.64    0.58 
  -7  -3   3    0.74    0.47 
  -6  -3   3    2.95    0.62 
  -5  -3   3    0.38    0.31 
   4   3  -3   18.14    1.43 
   3   3  -3    0.80    0.30 
   3   3  -3    1.04    0.33 
   2   3  -3    3.15    0.45 
   2   3  -3    2.06    0.36 
   1   3  -3  186.64   10.11 
   1   3  -3  191.15   10.37 
   0   3  -3   17.46    1.09 
   0   3  -3   18.44    1.07 
  -1   3  -3    0.32    0.08 
  -1   3  -3    0.50    0.14 
  -2   3  -3   21.05    1.19 
  -2   3  -3   20.66    1.28 
  -3   3  -3    9.31    0.62 
  -3   3  -3    9.15    0.70 
  -4   3  -3   -0.02    0.17 
  -4   3  -3   -0.18    0.15 
  -5   3  -3    1.21    0.39 
  -5   3  -3    2.39    0.38 
  -6   3  -3   -0.14    0.28 
  -6   3  -3    0.34    0.26 
  -7   3  -3    0.15    0.35 
  -8   3  -3    5.75    0.97 
  -9   3  -3    0.81    0.67 
  -9  -2   3   -0.32    0.60 
  -8  -2   3    0.46    0.53 
  -7  -2   3    2.68    0.65 
  -6  -2   3   -0.11    0.32 
   5   2  -3    0.23    0.34 
   4   2  -3    2.97    0.57 
   3   2  -3    4.78    0.63 
   2   2  -3    0.58    0.20 
   2   2  -3    0.77    0.24 
   1   2  -3   30.93    1.89 
   1   2  -3   32.60    1.83 
   0   2  -3  910.08   47.67 
   0   2  -3  900.13   48.80 
  -1   2  -3   11.48    0.66 
  -1   2  -3   10.48    0.71 
  -2   2  -3   12.82    0.77 
  -2   2  -3   11.92    0.82 
  -3   2  -3   19.71    1.31 
  -3   2  -3   21.12    1.26 
  -4   2  -3   60.35    3.36 
  -4   2  -3   55.78    3.31 
  -5   2  -3    0.72    0.33 
  -5   2  -3    1.03    0.30 
  -6   2  -3    4.35    0.58 
  -6   2  -3    3.24    0.62 
  -7   2  -3    1.08    0.48 
  -8   2  -3   -0.26    0.49 
  -9   2  -3    0.01    0.59 
  -9  -1   3    0.16    0.63 
  -8  -1   3   -0.51    0.42 
  -7  -1   3    1.00    0.48 
  -6  -1   3   -0.41    0.24 
   5   1  -3    6.97    0.93 
   4   1  -3    0.03    0.23 
   3   1  -3    2.71    0.45 
   2   1  -3   23.47    1.52 
   2   1  -3   23.75    1.45 
   1   1  -3    2.31    0.25 
   1   1  -3    2.53    0.31 
  -1  -1   3    2.10    0.16 
   0   1  -3    0.71    0.15 
   0   1  -3    0.58    0.12 
  -1   1  -3  117.49    6.41 
  -1   1  -3  121.82    6.52 
  -2   1  -3    2.43    0.32 
  -2   1  -3    3.30    0.32 
  -3   1  -3   24.92    1.50 
  -3   1  -3   23.95    1.53 
  -4   1  -3   -0.10    0.18 
  -5   1  -3    1.88    0.38 
  -6   1  -3    0.79    0.34 
  -7   1  -3    0.21    0.44 
  -7   1  -3    0.20    0.44 
  -8   1  -3    1.11    0.59 
  -9   1  -3   -0.34    0.56 
  -9   0   3    0.15    0.61 
  -8   0   3    0.45    0.55 
  -7   0   3    0.48    0.41 
   6   0  -3    1.35    0.51 
   5   0  -3    1.48    0.46 
   4   0  -3    7.92    0.87 
   3   0  -3   12.29    0.97 
   2   0  -3    0.84    0.24 
   2   0  -3    0.66    0.19 
  -2   0   3    0.55    0.13 
   1   0  -3  371.01   19.59 
  -1   0   3  351.98   19.17 
   0   0  -3   17.20    1.05 
   0   0  -3   18.04    1.00 
  -1   0  -3  200.95   10.70 
  -1   0  -3  201.62   10.93 
  -2   0  -3    2.53    0.32 
  -3   0  -3    3.09    0.39 
  -4   0  -3   10.13    0.80 
  -5   0  -3    0.90    0.33 
  -6   0  -3    1.40    0.46 
  -7   0  -3    0.16    0.44 
  -8   0  -3    1.11    0.62 
  -9   0  -3    0.16    0.57 
  -9   1   3    0.49    0.66 
  -8   1   3    2.31    0.66 
  -7   1   3    0.25    0.34 
   6  -1  -3    0.51    0.42 
   5  -1  -3    1.51    0.44 
   4  -1  -3    7.12    0.81 
   3  -1  -3   16.41    1.18 
   2  -1  -3  165.08    9.10 
  -2   1   3  164.98    8.84 
   1  -1  -3  364.74   19.22 
   1  -1  -3  370.67   19.73 
  -1   1   3  356.68   19.33 
   0  -1  -3   10.07    0.66 
  -1  -1  -3  319.47   17.32 
  -2  -1  -3   24.55    1.51 
  -3  -1  -3    1.62    0.33 
  -4  -1  -3    9.94    0.83 
  -5  -1  -3    2.97    0.50 
  -6  -1  -3    0.25    0.37 
  -7  -1  -3    0.28    0.46 
  -8  -1  -3    0.74    0.62 
  -9  -1  -3   -0.13    0.59 
  -8   2   3    0.45    0.47 
   7  -2  -3    0.41    0.44 
   6  -2  -3    5.37    0.86 
   5  -2  -3   -0.25    0.23 
   4  -2  -3   25.24    1.74 
   3  -2  -3  102.99    5.86 
  -3   2   3  103.27    5.64 
   2  -2  -3   66.63    3.83 
  -2   2   3   67.75    3.69 
   1  -2  -3  361.14   19.39 
  -1   2   3  354.43   19.02 
   0  -2  -3    2.54    0.29 
   0   2   3    2.82    0.29 
  -1  -2  -3  197.77   10.81 
  -2  -2  -3    8.95    0.70 
  -3  -2  -3    2.61    0.42 
  -4  -2  -3    3.95    0.56 
  -5  -2  -3    5.35    0.70 
  -6  -2  -3    0.99    0.46 
  -7  -2  -3    0.26    0.45 
  -8  -2  -3   -0.22    0.55 
  -9   3   3    0.40    0.55 
  -8   3   3    1.04    0.49 
   7  -3  -3    0.24    0.42 
   6  -3  -3    1.33    0.46 
   5  -3  -3   12.79    1.11 
   4  -3  -3   47.90    3.05 
  -4   3   3   52.33    2.92 
   3  -3  -3  126.14    6.95 
  -3   3   3  121.75    6.75 
   2  -3  -3    4.71    0.50 
  -2   3   3    5.66    0.45 
   1  -3  -3   35.24    2.06 
  -1   3   3   35.41    2.01 
   0  -3  -3    2.24    0.30 
   0   3   3    2.48    0.31 
  -1  -3  -3    9.13    0.72 
  -2  -3  -3    2.43    0.41 
  -3  -3  -3   81.81    4.70 
  -4  -3  -3   50.05    3.04 
  -5  -3  -3    3.20    0.62 
  -6  -3  -3    0.45    0.47 
  -7  -3  -3    0.97    0.58 
  -8  -3  -3    0.75    0.67 
  -8   4   3   -0.10    0.43 
   7  -4  -3    0.97    0.51 
  -7   4   3    0.65    0.37 
   6  -4  -3    4.15    0.73 
   5  -4  -3    2.19    0.49 
  -5   4   3    3.76    0.53 
   4  -4  -3   45.45    2.80 
  -4   4   3   45.75    2.69 
   3  -4  -3    1.13    0.29 
  -3   4   3    0.82    0.23 
  -3   4   3    0.97    0.17 
   2  -4  -3   13.92    1.02 
  -2   4   3   15.12    1.00 
  -2   4   3   16.48    0.88 
   1  -4  -3    0.72    0.19 
  -1   4   3    1.03    0.21 
   0  -4  -3  258.96   14.48 
   0   4   3  273.01   14.25 
  -1  -4  -3    7.27    0.66 
  -2  -4  -3   37.81    2.32 
  -3  -4  -3   -0.15    0.24 
  -4  -4  -3   -0.08    0.30 
  -5  -4  -3    6.66    0.84 
  -6  -4  -3    1.72    0.56 
  -7  -4  -3    0.69    0.54 
  -8  -4  -3    0.09    0.69 
  -9   5   3   -0.14    0.51 
  -8   5   3   -0.33    0.35 
  -8   5   3   -0.17    0.38 
   7  -5  -3    1.99    0.61 
  -7   5   3    1.98    0.47 
  -7   5   3    1.73    0.52 
   6  -5  -3    0.02    0.35 
  -6   5   3   -0.38    0.24 
  -6   5   3    0.10    0.22 
   5  -5  -3    4.89    0.69 
  -5   5   3    5.71    0.67 
  -5   5   3    5.04    0.51 
   4  -5  -3   14.57    1.13 
  -4   5   3   15.80    0.98 
  -4   5   3   15.69    1.11 
   3  -5  -3   63.31    3.61 
  -3   5   3   61.31    3.36 
  -3   5   3   61.29    3.52 
   2  -5  -3    7.80    0.60 
  -2   5   3    7.41    0.45 
  -2   5   3    7.13    0.60 
   1  -5  -3    3.91    0.39 
  -1   5   3    3.86    0.42 
  -1   5   3    3.68    0.29 
   0  -5  -3    3.78    0.43 
   0   5   3    4.00    0.43 
  -1  -5  -3   71.46    4.11 
  -2  -5  -3    1.89    0.42 
  -3  -5  -3   18.15    1.36 
  -4  -5  -3   10.00    1.03 
  -5  -5  -3    0.77    0.48 
  -6  -5  -3   -0.01    0.47 
  -7  -5  -3    0.12    0.58 
  -8  -5  -3   -0.20    0.69 
  -9   6   3    1.18    0.61 
  -8   6   3    0.36    0.47 
   7  -6  -3    0.34    0.47 
  -7   6   3    0.68    0.43 
  -7   6   3    1.30    0.38 
   6  -6  -3   13.77    1.20 
  -6   6   3   14.40    1.16 
  -6   6   3   12.99    0.99 
   5  -6  -3    1.10    0.38 
  -5   6   3    1.00    0.26 
  -5   6   3    1.07    0.33 
   4  -6  -3   23.82    1.62 
  -4   6   3   23.88    1.43 
  -4   6   3   25.26    1.62 
   3  -6  -3    0.29    0.18 
  -3   6   3    0.22    0.18 
  -3   6   3    0.43    0.14 
   2  -6  -3    5.93    0.50 
  -2   6   3    5.43    0.37 
  -2   6   3    5.12    0.54 
   1  -6  -3    9.75    0.75 
  -1   6   3   10.35    0.78 
  -1   6   3   11.68    0.69 
   0  -6  -3   14.59    1.03 
   0   6   3   14.86    1.01 
  -1  -6  -3   53.32    3.17 
  -2  -6  -3    1.46    0.40 
  -3  -6  -3   34.63    2.28 
  -4  -6  -3   -0.53    0.38 
  -5  -6  -3   11.04    1.20 
  -6  -6  -3    1.38    0.63 
  -7  -6  -3    1.85    0.81 
  -8  -6  -3    0.27    0.74 
  -9   7   3    0.95    0.59 
  -8   7   3    0.36    0.45 
  -7   7   3    0.22    0.36 
   6  -7  -3    1.48    0.46 
  -6   7   3    1.74    0.37 
  -6   7   3    1.65    0.47 
   5  -7  -3   11.82    0.98 
  -5   7   3   11.04    0.80 
  -5   7   3   10.41    1.01 
   4  -7  -3    1.76    0.37 
   3  -7  -3   11.38    0.90 
  -3   7   3   12.61    0.77 
  -3   7   3   13.25    0.95 
   2  -7  -3   26.89    1.66 
  -2   7   3   27.46    1.51 
  -2   7   3   25.32    1.66 
   1  -7  -3    0.79    0.22 
  -1   7   3    0.72    0.23 
  -1   7   3    0.92    0.20 
   0  -7  -3    7.47    0.68 
   0   7   3    6.89    0.65 
  -1  -7  -3    9.97    0.88 
  -2  -7  -3    1.43    0.43 
  -3  -7  -3    5.23    0.79 
  -4  -7  -3    9.15    1.09 
  -5  -7  -3    0.15    0.50 
  -6  -7  -3    0.35    0.60 
  -7  -7  -3    0.49    0.68 
  -8  -7  -3   -0.85    0.64 
  -9   8   3   -0.01    0.52 
  -8   8   3    0.32    0.46 
  -7   8   3    0.20    0.35 
   6  -8  -3   -0.19    0.23 
  -6   8   3    2.93    0.59 
   5  -8  -3    0.34    0.23 
  -5   8   3    0.14    0.32 
  -5   8   3    0.79    0.23 
   4  -8  -3    0.23    0.18 
  -4   8   3   -0.16    0.17 
  -4   8   3   -0.01    0.13 
   3  -8  -3    0.68    0.24 
  -3   8   3    1.22    0.32 
  -3   8   3    1.25    0.19 
   2  -8  -3   15.21    1.04 
  -2   8   3   16.94    0.95 
  -2   8   3   12.57    1.05 
   1  -8  -3    1.01    0.25 
  -1   8   3    0.97    0.21 
  -1   8   3    0.87    0.26 
   0  -8  -3   10.53    0.85 
   0   8   3   11.62    0.84 
   0   8   3    8.90    0.76 
  -1  -8  -3    6.41    0.76 
  -2  -8  -3    0.78    0.43 
  -3  -8  -3    1.62    0.55 
  -4  -8  -3    0.82    0.54 
  -5  -8  -3    1.52    0.62 
  -6  -8  -3    0.34    0.59 
  -7  -8  -3    0.03    0.70 
  -9   9   3    1.00    0.62 
  -8   9   3    1.52    0.58 
  -7   9   3    0.27    0.37 
  -6   9   3    1.80    0.52 
   5  -9  -3    6.41    0.74 
  -5   9   3    5.31    0.76 
  -4   9   3    1.63    0.43 
  -4   9   3    2.17    0.30 
   3  -9  -3   11.29    0.88 
  -3   9   3   12.04    0.75 
  -3   9   3    9.86    0.89 
   2  -9  -3    1.28    0.30 
  -2   9   3    1.90    0.26 
  -2   9   3    1.19    0.33 
   1  -9  -3    0.66    0.25 
  -1   9   3    1.30    0.32 
  -1   9   3    0.89    0.24 
   0  -9  -3   -0.25    0.21 
   0   9   3    0.24    0.21 
   0   9   3   -0.07    0.18 
  -1  -9  -3    0.61    0.35 
  -2  -9  -3    0.14    0.37 
  -3  -9  -3    0.12    0.44 
  -4  -9  -3    1.31    0.58 
  -5  -9  -3   -0.44    0.46 
  -6  -9  -3    0.08    0.59 
  -7  -9  -3   -0.60    0.66 
  -9  10   3   -0.40    0.52 
  -8  10   3   -0.27    0.44 
  -7  10   3    0.23    0.41 
  -6  10   3    1.16    0.47 
   5 -10  -3    0.57    0.32 
  -5  10   3    0.96    0.40 
   4 -10  -3    1.48    0.36 
  -4  10   3    1.96    0.46 
   3 -10  -3    0.49    0.22 
  -3  10   3    0.62    0.19 
  -3  10   3   -0.10    0.21 
   2 -10  -3   -0.04    0.14 
  -2  10   3   -0.11    0.19 
  -2  10   3    0.05    0.15 
   1 -10  -3   23.43    1.51 
  -1  10   3   18.71    1.46 
  -1  10   3   25.13    1.46 
   0 -10  -3    4.31    0.61 
   0  10   3    4.26    0.58 
   0  10   3    4.08    0.57 
  -1 -10  -3    3.41    0.63 
  -2 -10  -3    0.06    0.41 
  -3 -10  -3    0.68    0.51 
  -4 -10  -3    0.54    0.58 
  -5 -10  -3    2.44    0.77 
  -6 -10  -3    0.73    0.75 
  -7 -10  -3    0.35    0.78 
  -9  11   3    0.17    0.59 
  -8  11   3   -0.39    0.47 
  -7  11   3    0.48    0.48 
  -6  11   3    0.64    0.43 
  -5  11   3    0.28    0.36 
   4 -11  -3    0.05    0.22 
  -4  11   3    0.69    0.34 
   3 -11  -3    0.50    0.25 
  -3  11   3    0.82    0.33 
  -3  11   3    0.85    0.24 
   2 -11  -3   11.74    0.96 
  -2  11   3   14.61    0.93 
  -2  11   3   11.61    1.01 
   1 -11  -3    4.37    0.57 
  -1  11   3    3.20    0.53 
  -1  11   3    4.23    0.52 
   0 -11  -3    7.26    0.82 
   0  11   3    8.28    0.82 
   0  11   3    8.02    0.83 
  -1 -11  -3    1.87    0.53 
  -2 -11  -3   -0.43    0.37 
  -3 -11  -3    1.65    0.61 
  -4 -11  -3    0.00    0.47 
  -5 -11  -3    0.33    0.60 
  -6 -11  -3   -0.15    0.66 
  -8  12   3   -0.18    0.49 
  -7  12   3    0.89    0.53 
  -6  12   3   -0.42    0.35 
  -5  12   3    0.98    0.47 
   4 -12  -3    0.17    0.29 
  -4  12   3    0.15    0.30 
   3 -12  -3   -0.05    0.22 
  -3  12   3    0.40    0.30 
   2 -12  -3    1.60    0.36 
  -2  12   3    1.93    0.37 
  -2  12   3    1.51    0.39 
   1 -12  -3    5.04    0.66 
  -1  12   3    5.25    0.62 
  -1  12   3    5.13    0.67 
   0 -12  -3   17.70    1.38 
   0  12   3   18.71    1.35 
   0  12   3   16.53    1.30 
  -1 -12  -3    0.36    0.43 
  -2 -12  -3    1.61    0.59 
  -3 -12  -3    0.14    0.46 
  -4 -12  -3    2.50    0.75 
  -5 -12  -3    0.20    0.66 
  -6 -12  -3   -0.90    0.67 
  -8  13   3   -0.32    0.51 
  -7  13   3    0.11    0.47 
  -6  13   3    2.37    0.65 
  -5  13   3    0.27    0.40 
  -4  13   3    1.66    0.49 
   3 -13  -3   -0.24    0.19 
  -3  13   3    0.36    0.31 
   2 -13  -3    0.74    0.30 
  -2  13   3    0.65    0.35 
   1 -13  -3   13.58    1.16 
  -1  13   3   14.66    1.19 
  -1  13   3   16.31    1.17 
   0 -13  -3    0.72    0.42 
   0  13   3    0.70    0.36 
   0  13   3    0.58    0.36 
  -1 -13  -3    1.04    0.51 
  -2 -13  -3   -0.29    0.42 
  -3 -13  -3    1.26    0.62 
  -4 -13  -3   -0.52    0.49 
  -5 -13  -3   -1.00    0.52 
  -6 -13  -3   -0.07    0.69 
  -8  14   3    0.16    0.56 
  -7  14   3   -0.29    0.45 
  -6  14   3    0.03    0.47 
  -5  14   3    0.12    0.37 
  -4  14   3   -0.28    0.27 
   3 -14  -3    1.79    0.43 
  -3  14   3    2.01    0.48 
   2 -14  -3    5.73    0.72 
  -2  14   3    4.81    0.73 
   1 -14  -3    4.65    0.66 
  -1  14   3    2.64    0.57 
   0 -14  -3    2.07    0.55 
   0  14   3    2.14    0.52 
   0  14   3    2.86    0.57 
  -1 -14  -3   -0.14    0.33 
  -2 -14  -3    0.21    0.46 
  -3 -14  -3    0.77    0.63 
  -4 -14  -3   -0.41    0.46 
  -5 -14  -3   -0.34    0.65 
  -7  15   3   -0.07    0.45 
  -6  15   3    0.68    0.55 
  -5  15   3    0.72    0.42 
  -4  15   3    0.12    0.33 
  -3  15   3    1.00    0.40 
   2 -15  -3    0.20    0.34 
  -2  15   3    0.05    0.28 
   1 -15  -3   10.23    0.97 
  -1  15   3    6.30    0.86 
   0 -15  -3    3.72    0.71 
   0  15   3    3.54    0.67 
  -1 -15  -3    0.99    0.51 
  -2 -15  -3   -0.54    0.42 
  -3 -15  -3    1.11    0.62 
  -4 -15  -3    0.53    0.67 
  -5 -15  -3   -0.06    0.76 
  -7  16   3   -0.84    0.45 
  -6  16   3   -0.06    0.48 
  -5  16   3   -0.04    0.36 
  -4  16   3   -0.36    0.31 
  -3  16   3    0.22    0.32 
   2 -16  -3    1.28    0.48 
  -2  16   3    2.06    0.54 
   1 -16  -3    0.56    0.39 
  -1  16   3    0.41    0.35 
   0 -16  -3    0.41    0.41 
   0  16   3    0.61    0.44 
  -1 -16  -3    0.48    0.44 
  -2 -16  -3    0.82    0.60 
  -3 -16  -3    0.16    0.58 
  -4 -16  -3    0.65    0.73 
  -6  17   3   -0.32    0.42 
  -5  17   3    0.28    0.48 
  -4  17   3    0.29    0.43 
  -3  17   3   -0.01    0.36 
  -2  17   3    2.64    0.63 
   1 -17  -3    0.18    0.38 
  -1  17   3   -0.14    0.28 
   0 -17  -3    0.05    0.40 
   0  17   3    0.31    0.43 
  -1 -17  -3    0.34    0.46 
  -2 -17  -3    0.34    0.55 
  -3 -17  -3    0.15    0.62 
  -6  18   3    0.28    0.63 
  -5  18   3    0.66    0.54 
  -4  18   3    0.11    0.43 
  -3  18   3    0.38    0.45 
  -2  18   3    0.15    0.36 
   1 -18  -3    0.88    0.50 
  -1  18   3    0.37    0.43 
   0 -18  -3    0.88    0.52 
   0  18   3    0.26    0.45 
  -1 -18  -3   -0.18    0.46 
  -2 -18  -3    0.95    0.65 
  -3 -18  -3   -0.29    0.60 
  -5  19   3    0.81    0.67 
  -4  19   3    0.99    0.60 
  -3  19   3    0.55    0.51 
  -2  19   3   -0.19    0.38 
  -1  19   3    0.31    0.46 
   0 -19  -3    0.38    0.47 
   0  19   3    0.25    0.53 
  -1 -19  -3   -0.15    0.52 
  -2 -19  -3    0.73    0.70 
  -4  20   3   -0.12    0.56 
  -3  20   3   -0.05    0.52 
  -2  20   3    0.23    0.51 
  -1  20   3   -0.19    0.53 
   1  20  -4   -0.62    0.71 
   0  20  -4    0.77    0.78 
  -1  20  -4    0.29    0.71 
  -3  20  -4    0.32    0.54 
  -4  20  -4    1.07    0.62 
   2  19  -4   -0.07    0.68 
   1  19  -4   -0.97    0.57 
   0  19  -4    0.23    0.59 
  -1  19  -4   -0.10    0.57 
  -2  19  -4    0.39    0.55 
  -2  19  -4    1.32    0.68 
  -3  19  -4    0.30    0.46 
  -4  19  -4   -0.54    0.42 
  -5  19  -4    0.28    0.55 
   3  18  -4    0.38    0.74 
  -3 -18   4   -0.03    0.73 
   2  18  -4    0.00    0.61 
  -2 -18   4   -1.11    0.52 
   1  18  -4    0.70    0.63 
   0  18  -4    0.18    0.53 
  -1  18  -4    0.32    0.54 
  -2  18  -4    0.60    0.42 
  -2  18  -4    0.15    0.52 
  -3  18  -4    0.55    0.43 
  -3  18  -4    0.24    0.53 
  -4  18  -4   -0.01    0.47 
  -5  18  -4   -0.03    0.51 
  -6  18  -4    0.24    0.56 
  -4 -17   4   -0.59    0.67 
   3  17  -4    0.76    0.76 
  -3 -17   4    1.28    0.71 
   2  17  -4    0.39    0.59 
  -2 -17   4   -0.48    0.47 
   1  17  -4   -0.07    0.49 
   0  17  -4    2.55    0.74 
  -1  17  -4    0.82    0.54 
  -1  17  -4    0.96    0.45 
  -2  17  -4   -0.12    0.34 
  -2  17  -4    0.48    0.48 
  -3  17  -4    0.39    0.46 
  -3  17  -4    0.10    0.40 
  -4  17  -4    0.03    0.47 
  -4  17  -4   -0.27    0.36 
  -5  17  -4    0.20    0.42 
  -6  17  -4    0.72    0.52 
  -4 -16   4   -0.22    0.63 
   3  16  -4   -0.25    0.57 
  -3 -16   4   -0.02    0.55 
   2  16  -4    0.22    0.55 
  -2 -16   4   -0.34    0.42 
   1  16  -4    0.52    0.52 
  -1 -16   4    0.17    0.45 
   0  16  -4    0.49    0.42 
  -1  16  -4    4.20    0.64 
  -1  16  -4    3.81    0.75 
  -2  16  -4   -0.14    0.36 
  -2  16  -4    0.15    0.36 
  -3  16  -4    2.22    0.60 
  -3  16  -4    1.28    0.46 
  -4  16  -4    0.57    0.41 
  -4  16  -4    0.82    0.48 
  -5  16  -4   -0.48    0.43 
  -5  16  -4   -0.42    0.38 
  -6  16  -4    0.57    0.44 
  -7  16  -4   -0.73    0.47 
  -5 -15   4    0.41    0.64 
  -4 -15   4   -0.06    0.54 
   3  15  -4   -0.09    0.50 
  -3 -15   4    0.39    0.51 
   2  15  -4    0.46    0.48 
  -2 -15   4    0.18    0.46 
   1  15  -4   -0.03    0.40 
  -1 -15   4    0.08    0.39 
   0  15  -4    1.44    0.55 
   0  15  -4    1.80    0.44 
   0 -15   4    0.70    0.41 
  -1  15  -4    0.37    0.40 
  -1  15  -4    0.22    0.29 
  -2  15  -4    2.70    0.61 
  -2  15  -4    2.42    0.53 
  -3  15  -4    3.48    0.65 
  -3  15  -4    2.81    0.61 
  -4  15  -4    0.18    0.41 
  -4  15  -4   -0.12    0.33 
  -5  15  -4    0.85    0.46 
  -5  15  -4    2.20    0.57 
  -6  15  -4    0.31    0.50 
  -6  15  -4    1.97    0.58 
  -7  15  -4    1.78    0.66 
  -6 -14   4   -0.81    0.62 
  -5 -14   4   -0.42    0.50 
  -4 -14   4    0.01    0.47 
   3  14  -4    0.88    0.58 
  -3 -14   4    0.26    0.43 
   2  14  -4   -0.31    0.36 
  -2 -14   4   -0.26    0.35 
   1  14  -4    0.43    0.44 
  -1 -14   4    0.09    0.38 
   0  14  -4   -0.07    0.20 
   0  14  -4   -0.17    0.29 
   0 -14   4   -0.38    0.20 
  -1  14  -4    0.09    0.32 
  -1  14  -4    0.06    0.27 
  -2  14  -4    0.25    0.31 
  -2  14  -4   -0.23    0.29 
  -3  14  -4    0.38    0.37 
  -3  14  -4   -0.21    0.29 
  -4  14  -4    0.83    0.41 
  -4  14  -4    0.83    0.41 
  -5  14  -4    1.21    0.51 
  -5  14  -4    0.87    0.42 
  -6  14  -4    3.86    0.72 
  -6  14  -4    3.98    0.78 
  -7  14  -4    2.02    0.67 
  -6 -13   4   -0.06    0.55 
  -5 -13   4   -0.35    0.39 
   4  13  -4   -0.17    0.49 
  -4 -13   4   -0.28    0.39 
   3  13  -4    1.91    0.65 
  -3 -13   4    0.70    0.47 
   2  13  -4   -0.31    0.33 
  -2 -13   4    0.51    0.41 
   1  13  -4   -0.01    0.25 
   1  13  -4   -0.21    0.31 
  -1 -13   4    0.02    0.33 
   0  13  -4    1.84    0.49 
   0  13  -4    1.53    0.34 
   0 -13   4    0.68    0.31 
  -1  13  -4    2.49    0.54 
  -1  13  -4    3.16    0.49 
  -2  13  -4    3.16    0.54 
  -2  13  -4    1.97    0.49 
  -3  13  -4    0.37    0.36 
  -3  13  -4    0.12    0.30 
  -4  13  -4    0.28    0.32 
  -4  13  -4    0.54    0.38 
  -5  13  -4    3.70    0.66 
  -5  13  -4    3.53    0.68 
  -6  13  -4    0.26    0.37 
  -6  13  -4   -0.04    0.36 
  -7  13  -4    1.07    0.52 
  -7  13  -4    0.03    0.45 
  -8  13  -4   -0.30    0.49 
  -6 -12   4    0.63    0.55 
  -5 -12   4    0.69    0.50 
   4  12  -4   -0.88    0.36 
  -4 -12   4   -0.04    0.35 
   3  12  -4    0.07    0.43 
  -3 -12   4    0.51    0.38 
   2  12  -4    0.57    0.41 
  -2 -12   4    0.02    0.34 
   1  12  -4   -0.33    0.24 
   1  12  -4    0.68    0.25 
  -1 -12   4    0.16    0.30 
   0  12  -4    5.88    0.70 
   0  12  -4    1.71    0.32 
   0 -12   4    1.06    0.31 
  -1  12  -4   16.10    1.17 
  -1  12  -4   16.60    1.26 
   1 -12   4   16.93    1.13 
  -2  12  -4    2.33    0.48 
  -2  12  -4    2.51    0.48 
  -3  12  -4   -0.18    0.27 
  -3  12  -4    0.05    0.26 
  -4  12  -4    1.70    0.46 
  -4  12  -4    1.80    0.44 
  -5  12  -4    0.31    0.35 
  -5  12  -4    0.31    0.33 
  -6  12  -4    0.00    0.35 
  -7  12  -4    0.53    0.44 
  -8  12  -4   -0.15    0.52 
  -7 -11   4   -0.80    0.56 
  -6 -11   4   -0.46    0.38 
  -5 -11   4    0.09    0.39 
   4  11  -4    3.78    0.84 
  -4 -11   4    3.61    0.70 
   3  11  -4    1.25    0.51 
  -3 -11   4    1.03    0.38 
   2  11  -4    3.75    0.70 
  -2 -11   4    5.27    0.70 
   1  11  -4    0.79    0.24 
   1  11  -4    0.85    0.36 
  -1 -11   4    0.55    0.30 
   0  11  -4   -0.13    0.13 
   0  11  -4    0.60    0.29 
   0 -11   4   -0.13    0.13 
  -1  11  -4    0.02    0.18 
  -1  11  -4    0.05    0.21 
   1 -11   4    0.48    0.23 
  -2  11  -4    1.76    0.40 
  -2  11  -4    2.43    0.46 
  -3  11  -4    0.76    0.32 
  -3  11  -4   -0.07    0.21 
  -4  11  -4    0.14    0.27 
  -5  11  -4    6.28    0.77 
  -6  11  -4    0.23    0.32 
  -7  11  -4    0.44    0.40 
  -8  11  -4    0.20    0.51 
  -7 -10   4    0.20    0.58 
  -6 -10   4    0.20    0.42 
  -5 -10   4    1.63    0.51 
   4  10  -4    0.37    0.40 
  -4 -10   4    0.65    0.38 
   3  10  -4    0.40    0.38 
  -3 -10   4    0.74    0.35 
   2  10  -4   -0.26    0.23 
  -2 -10   4   -0.29    0.20 
   1  10  -4    0.78    0.32 
   1  10  -4    0.26    0.17 
  -1 -10   4    0.59    0.26 
   0  10  -4    0.14    0.13 
   0  10  -4    0.55    0.27 
   0 -10   4    0.02    0.13 
  -1  10  -4    1.39    0.31 
  -1  10  -4    1.11    0.29 
   1 -10   4    1.01    0.25 
  -2  10  -4    0.53    0.25 
  -2  10  -4    0.77    0.27 
   2 -10   4    1.07    0.18 
  -3  10  -4    1.16    0.33 
  -4  10  -4    0.27    0.26 
  -5  10  -4    0.78    0.36 
  -6  10  -4    4.89    0.71 
  -7  10  -4   -0.06    0.35 
  -8  10  -4   -0.10    0.48 
  -7  -9   4   -0.03    0.58 
  -6  -9   4   -0.32    0.34 
  -5  -9   4    1.69    0.52 
   4   9  -4    3.89    0.79 
  -4  -9   4    5.30    0.77 
   3   9  -4    0.72    0.40 
  -3  -9   4    1.17    0.37 
   2   9  -4    0.22    0.21 
  -2  -9   4    0.06    0.21 
   1   9  -4    1.83    0.28 
   1   9  -4    2.00    0.41 
  -1  -9   4    2.10    0.37 
   0   9  -4    6.32    0.63 
   0   9  -4    4.04    0.42 
  -1   9  -4    1.26    0.29 
  -1   9  -4    1.55    0.32 
   1  -9   4    1.40    0.24 
  -2   9  -4    0.58    0.22 
  -2   9  -4    1.29    0.31 
  -3   9  -4   -0.04    0.16 
  -4   9  -4    2.31    0.45 
  -5   9  -4    4.06    0.61 
  -6   9  -4    1.88    0.52 
  -7   9  -4    0.87    0.46 
  -8   9  -4    0.25    0.49 
  -8  -8   4    0.79    0.71 
  -7  -8   4    1.63    0.72 
  -6  -8   4    5.88    0.95 
  -5  -8   4    2.35    0.54 
   4   8  -4    2.64    0.65 
  -4  -8   4    2.76    0.58 
   3   8  -4    9.45    1.05 
  -3  -8   4    9.33    0.94 
   2   8  -4   11.52    0.96 
  -2  -8   4   10.14    0.88 
   1   8  -4    1.31    0.34 
   1   8  -4    1.25    0.21 
  -1  -8   4    1.49    0.31 
   0   8  -4    2.04    0.27 
   0   8  -4    2.02    0.36 
   0  -8   4    0.77    0.20 
  -1   8  -4   59.53    3.47 
  -1   8  -4   59.06    3.44 
   1  -8   4   63.13    3.39 
  -2   8  -4    1.70    0.34 
  -3   8  -4    1.48    0.31 
  -4   8  -4    5.50    0.63 
  -5   8  -4    0.87    0.35 
  -6   8  -4    2.82    0.57 
  -7   8  -4    0.52    0.40 
  -8   8  -4    1.57    0.60 
  -9   8  -4   -0.15    0.51 
  -8  -7   4    0.53    0.62 
  -7  -7   4    3.74    0.86 
  -6  -7   4    0.04    0.42 
  -5  -7   4    8.24    1.00 
   4   7  -4    1.19    0.46 
  -4  -7   4    0.79    0.36 
   3   7  -4    1.85    0.45 
  -3  -7   4    1.59    0.38 
   2   7  -4    2.32    0.46 
  -2  -7   4    1.79    0.38 
   1   7  -4    0.77    0.16 
   1   7  -4    0.62    0.23 
  -1  -7   4    0.74    0.23 
   0   7  -4   80.36    4.24 
   0   7  -4   73.98    4.31 
  -1   7  -4    0.29    0.17 
   1  -7   4    0.17    0.12 
  -2   7  -4   22.05    1.41 
  -3   7  -4    5.49    0.60 
  -4   7  -4   11.49    0.92 
  -5   7  -4    2.88    0.50 
  -6   7  -4    2.39    0.52 
  -7   7  -4    0.21    0.36 
  -8   7  -4    0.30    0.49 
  -9   7  -4    0.56    0.60 
  -8  -6   4    0.09    0.58 
  -7  -6   4    0.18    0.49 
  -6  -6   4    4.51    0.82 
  -5  -6   4    2.11    0.55 
  -4  -6   4    4.67    0.68 
   3   6  -4    1.98    0.46 
  -3  -6   4    2.44    0.46 
   2   6  -4   21.70    1.54 
  -2  -6   4   23.55    1.50 
   1   6  -4   48.84    2.70 
   1   6  -4   48.12    2.88 
  -1  -6   4   51.40    2.87 
   0   6  -4  215.48   10.57 
   0   6  -4  209.33   10.60 
   0  -6   4  168.50   10.74 
  -1   6  -4   15.45    1.03 
   1  -6   4   16.06    0.93 
  -2   6  -4    3.97    0.46 
  -3   6  -4    9.83    0.78 
  -4   6  -4    1.12    0.20 
  -4   6  -4    1.02    0.28 
  -5   6  -4    1.43    0.40 
  -6   6  -4    0.11    0.33 
  -7   6  -4    0.05    0.36 
  -8   6  -4    0.07    0.49 
  -9   6  -4    0.27    0.58 
  -8  -5   4    0.03    0.58 
  -7  -5   4    3.58    0.82 
  -6  -5   4    0.62    0.44 
  -5  -5   4    1.82    0.51 
  -4  -5   4    0.05    0.21 
   3   5  -4    2.40    0.49 
   3   5  -4    2.51    0.50 
   2   5  -4    4.62    0.58 
   2   5  -4    4.54    0.61 
   1   5  -4  115.02    6.39 
   1   5  -4  109.21    6.21 
   1   5  -4  115.90    6.07 
   0   5  -4   12.64    0.89 
   0   5  -4   14.25    0.90 
  -1   5  -4    4.26    0.33 
  -1   5  -4    4.34    0.42 
  -2   5  -4   12.36    0.87 
  -3   5  -4    0.51    0.21 
  -4   5  -4   48.68    2.84 
  -4   5  -4   47.35    2.70 
  -5   5  -4   -0.01    0.24 
  -6   5  -4    0.18    0.33 
  -7   5  -4    0.48    0.42 
  -8   5  -4    0.51    0.53 
  -9   5  -4    3.05    0.91 
  -8  -4   4    0.10    0.55 
  -7  -4   4    0.50    0.47 
  -6  -4   4    0.39    0.40 
  -5  -4   4    2.12    0.49 
   4   4  -4    4.71    0.75 
   3   4  -4    5.17    0.71 
   3   4  -4    5.28    0.67 
   2   4  -4   10.69    0.90 
   2   4  -4   11.98    0.89 
   1   4  -4   38.42    2.05 
   1   4  -4   38.12    2.30 
   1   4  -4   37.37    2.21 
   0   4  -4   17.46    1.11 
   0   4  -4   18.43    1.13 
  -1   4  -4    0.74    0.18 
  -1   4  -4    0.77    0.13 
  -2   4  -4    2.85    0.37 
  -3   4  -4   38.33    2.20 
  -3   4  -4   40.33    2.32 
  -4   4  -4   -0.11    0.18 
  -4   4  -4    0.03    0.17 
  -5   4  -4    7.41    0.80 
  -5   4  -4    6.99    0.60 
  -6   4  -4    0.57    0.38 
  -7   4  -4    0.09    0.40 
  -8   4  -4    2.67    0.75 
  -9   4  -4    0.65    0.67 
  -9  -3   4    0.54    0.65 
  -8  -3   4    1.97    0.73 
  -7  -3   4    0.51    0.42 
  -6  -3   4   -0.21    0.32 
   5   3  -4    0.31    0.32 
   4   3  -4    0.19    0.26 
   3   3  -4   16.89    1.28 
   3   3  -4   19.98    1.39 
   2   3  -4    0.87    0.27 
   2   3  -4    0.99    0.27 
   1   3  -4    4.40    0.46 
   1   3  -4    3.46    0.39 
   0   3  -4   72.90    4.43 
   0   3  -4   86.99    4.35 
  -1   3  -4   -0.09    0.10 
  -1   3  -4    0.01    0.08 
  -2   3  -4    7.01    0.46 
  -2   3  -4    6.34    0.53 
  -3   3  -4    0.93    0.26 
  -3   3  -4    0.94    0.22 
  -4   3  -4   13.93    0.94 
  -4   3  -4   13.92    1.03 
  -5   3  -4    0.74    0.31 
  -5   3  -4   -0.05    0.23 
  -6   3  -4    6.14    0.64 
  -6   3  -4    4.90    0.75 
  -7   3  -4    1.98    0.58 
  -8   3  -4    1.54    0.64 
  -9   3  -4    0.87    0.66 
  -9  -2   4    0.66    0.67 
  -8  -2   4    0.26    0.51 
  -7  -2   4    0.10    0.35 
   6   2  -4    0.77    0.47 
   5   2  -4    1.71    0.55 
   4   2  -4    0.51    0.28 
   3   2  -4    0.60    0.27 
   3   2  -4    1.00    0.27 
   2   2  -4    0.06    0.14 
   2   2  -4    0.25    0.17 
  -2  -2   4    0.04    0.07 
   1   2  -4  147.70    8.03 
   1   2  -4  143.09    7.79 
   0   2  -4   62.57    3.38 
   0   2  -4   61.50    3.47 
  -1   2  -4    2.27    0.28 
  -1   2  -4    2.15    0.22 
  -2   2  -4   43.82    2.59 
  -2   2  -4   47.12    2.57 
  -3   2  -4    9.57    0.69 
  -3   2  -4    9.75    0.75 
  -4   2  -4    0.96    0.29 
  -4   2  -4    1.25    0.30 
  -5   2  -4    5.01    0.69 
  -5   2  -4    4.98    0.57 
  -6   2  -4    0.12    0.34 
  -6   2  -4    0.24    0.27 
  -7   2  -4    0.07    0.37 
  -8   2  -4    5.85    1.01 
  -9   2  -4    0.46    0.59 
  -9  -1   4    0.81    0.71 
  -8  -1   4    0.32    0.46 
  -7  -1   4    0.81    0.46 
   6   1  -4    0.86    0.48 
   5   1  -4    7.85    1.00 
   4   1  -4    4.12    0.65 
   3   1  -4    7.90    0.81 
   2   1  -4   11.30    0.83 
   2   1  -4   12.78    0.94 
  -2  -1   4   12.81    0.73 
   1   1  -4   25.04    1.51 
   1   1  -4   24.11    1.42 
   0   1  -4  206.94   11.58 
   0   1  -4  218.70   11.29 
  -1   1  -4   48.63    2.66 
  -1   1  -4   46.21    2.64 
  -2   1  -4    1.33    0.24 
  -2   1  -4    1.21    0.23 
  -3   1  -4    0.37    0.21 
  -3   1  -4   -0.13    0.14 
  -4   1  -4    1.32    0.33 
  -4   1  -4    1.01    0.28 
  -5   1  -4    3.27    0.50 
  -5   1  -4    2.39    0.52 
  -6   1  -4    1.37    0.42 
  -6   1  -4    0.90    0.45 
  -7   1  -4    1.56    0.55 
  -7   1  -4    1.33    0.54 
  -8   1  -4   -0.03    0.48 
  -9   1  -4    0.80    0.63 
  -9   0   4    0.10    0.60 
  -8   0   4    0.05    0.46 
   7   0  -4    0.16    0.44 
   6   0  -4   -0.12    0.30 
   5   0  -4    2.72    0.60 
   4   0  -4   23.75    1.70 
   3   0  -4    0.75    0.26 
  -3   0   4    0.70    0.16 
   2   0  -4   41.60    2.47 
  -2   0   4   40.58    2.26 
   1   0  -4    1.38    0.25 
   1   0  -4    0.40    0.10 
  -1   0   4    0.97    0.15 
   0   0  -4  751.56   37.81 
   0   0  -4  682.94   38.70 
  -1   0  -4   32.36    1.80 
  -1   0  -4   30.65    1.82 
  -2   0  -4    6.58    0.54 
  -2   0  -4    7.05    0.56 
  -3   0  -4   26.98    1.68 
  -4   0  -4    0.30    0.25 
  -5   0  -4    0.51    0.31 
  -6   0  -4    0.52    0.39 
  -7   0  -4    0.63    0.50 
  -7   0  -4    0.53    0.49 
  -8   0  -4    0.65    0.58 
  -9   0  -4    0.38    0.62 
  -9   1   4   -0.18    0.56 
  -8   1   4    0.34    0.48 
   7  -1  -4    1.93    0.66 
   6  -1  -4    0.23    0.39 
   5  -1  -4    0.86    0.38 
   4  -1  -4    0.59    0.31 
  -4   1   4    0.73    0.22 
   3  -1  -4   34.54    2.22 
  -3   1   4   35.68    2.03 
   2  -1  -4    7.38    0.64 
   2  -1  -4    7.65    0.55 
  -2   1   4    7.96    0.53 
   1  -1  -4    4.02    0.42 
   1  -1  -4    4.43    0.30 
  -1   1   4    4.36    0.34 
   0  -1  -4   17.55    1.09 
  -1  -1  -4   24.48    1.51 
  -1  -1  -4   25.37    1.45 
  -2  -1  -4    0.17    0.20 
  -3  -1  -4    4.78    0.55 
  -4  -1  -4   14.54    1.10 
  -5  -1  -4    3.17    0.54 
  -6  -1  -4    0.54    0.44 
  -7  -1  -4   -0.03    0.46 
  -8  -1  -4   -0.07    0.54 
  -9   2   4    1.08    0.68 
  -8   2   4    2.23    0.61 
   7  -2  -4    0.12    0.44 
   6  -2  -4    0.64    0.44 
   5  -2  -4   -0.11    0.25 
  -5   2   4    0.12    0.20 
   4  -2  -4   45.85    2.86 
  -4   2   4   45.39    2.63 
   3  -2  -4    1.08    0.29 
  -3   2   4    1.13    0.24 
   2  -2  -4    4.65    0.50 
  -2   2   4    4.59    0.39 
   1  -2  -4   41.99    2.18 
   1  -2  -4   40.54    2.36 
  -1   2   4   38.37    2.28 
   0  -2  -4   14.55    0.81 
   0  -2  -4   12.51    0.88 
  -1  -2  -4    7.36    0.60 
  -2  -2  -4   17.93    1.21 
  -3  -2  -4    7.30    0.72 
  -4  -2  -4    9.00    0.88 
  -5  -2  -4    1.64    0.51 
  -6  -2  -4    2.94    0.65 
  -7  -2  -4   -0.66    0.48 
  -8  -2  -4    1.63    0.76 
   8  -3  -4    1.20    0.56 
  -8   3   4    0.01    0.36 
   7  -3  -4    0.55    0.44 
  -7   3   4    0.33    0.33 
   6  -3  -4    0.14    0.40 
  -6   3   4    0.25    0.25 
   5  -3  -4    6.67    0.84 
  -5   3   4    5.79    0.64 
   4  -3  -4   10.87    0.94 
  -4   3   4   10.85    0.82 
   3  -3  -4  316.34   17.16 
  -3   3   4  310.13   16.75 
   2  -3  -4    2.48    0.38 
  -2   3   4    3.39    0.36 
   1  -3  -4    0.27    0.14 
  -1   3   4    0.40    0.15 
   0  -3  -4   91.87    5.16 
   0   3   4   93.68    5.10 
  -1  -3  -4   21.36    1.37 
  -2  -3  -4   46.76    2.79 
  -3  -3  -4    1.23    0.38 
  -4  -3  -4    2.24    0.50 
  -5  -3  -4   10.13    1.03 
  -6  -3  -4   -0.46    0.40 
  -7  -3  -4    0.56    0.59 
  -8  -3  -4    1.13    0.75 
   8  -4  -4    0.11    0.53 
  -8   4   4   -0.01    0.39 
  -8   4   4   -0.31    0.35 
   7  -4  -4    0.93    0.52 
  -7   4   4    2.86    0.56 
   6  -4  -4    9.72    1.12 
  -6   4   4   10.92    0.99 
   5  -4  -4    0.42    0.28 
  -5   4   4    0.57    0.26 
   4  -4  -4  106.93    5.94 
  -4   4   4   99.72    5.72 
   3  -4  -4   31.32    1.97 
  -3   4   4   30.79    1.87 
   2  -4  -4   40.69    2.43 
  -2   4   4   40.85    2.36 
   1  -4  -4    9.86    0.68 
  -1   4   4    8.17    0.64 
   0  -4  -4    0.27    0.16 
   0   4   4    0.52    0.20 
  -1  -4  -4   44.74    2.67 
  -2  -4  -4    1.70    0.41 
  -3  -4  -4   12.07    1.01 
  -4  -4  -4    5.87    0.78 
  -5  -4  -4    0.26    0.45 
  -6  -4  -4    0.83    0.56 
  -7  -4  -4    1.29    0.64 
  -8  -4  -4   -0.94    0.65 
   8  -5  -4    0.53    0.62 
  -8   5   4    0.16    0.43 
   7  -5  -4    1.67    0.58 
  -7   5   4    2.17    0.53 
  -7   5   4    1.32    0.42 
   6  -5  -4   10.15    1.17 
  -6   5   4   11.83    1.02 
  -6   5   4   12.75    0.95 
   5  -5  -4    6.73    0.82 
  -5   5   4    6.68    0.58 
  -5   5   4    5.12    0.67 
   4  -5  -4   -0.03    0.18 
  -4   5   4    0.51    0.22 
  -4   5   4   -0.16    0.13 
   3  -5  -4   60.63    3.56 
  -3   5   4   62.24    3.27 
  -3   5   4   58.10    3.45 
   2  -5  -4   39.92    2.34 
  -2   5   4   38.05    2.28 
   1  -5  -4    0.96    0.22 
  -1   5   4    1.36    0.27 
   0  -5  -4    2.29    0.37 
   0   5   4    3.30    0.42 
  -1  -5  -4   19.44    1.34 
  -2  -5  -4   18.80    1.35 
  -3  -5  -4   21.41    1.54 
  -4  -5  -4   16.05    1.35 
  -5  -5  -4    5.12    0.85 
  -6  -5  -4    1.22    0.60 
  -7  -5  -4    2.41    0.79 
  -8  -5  -4    0.53    0.77 
  -9   6   4    0.41    0.59 
  -8   6   4    0.42    0.43 
   7  -6  -4    0.19    0.46 
  -7   6   4    0.34    0.39 
   6  -6  -4   18.65    1.50 
  -6   6   4   18.10    1.24 
  -6   6   4   17.76    1.39 
   5  -6  -4    7.50    0.88 
  -5   6   4    7.94    0.63 
  -5   6   4    8.71    0.84 
   4  -6  -4   14.90    1.17 
  -4   6   4   15.49    1.13 
  -4   6   4   16.23    0.97 
   3  -6  -4    6.51    0.66 
  -3   6   4    6.49    0.64 
  -3   6   4    6.20    0.43 
   2  -6  -4    3.28    0.43 
  -2   6   4    3.59    0.44 
   1  -6  -4   86.85    4.84 
  -1   6   4   84.23    4.77 
   0  -6  -4    9.91    0.80 
   0   6   4   10.78    0.81 
  -1  -6  -4  107.19    6.10 
  -2  -6  -4    2.59    0.54 
  -3  -6  -4    0.59    0.42 
  -4  -6  -4   12.18    1.22 
  -5  -6  -4    3.80    0.78 
  -6  -6  -4    0.45    0.59 
  -7  -6  -4   -0.69    0.55 
  -8  -6  -4   -0.11    0.70 
  -9   7   4    0.61    0.56 
  -8   7   4    0.24    0.44 
   7  -7  -4   -0.09    0.44 
  -7   7   4    0.37    0.36 
   6  -7  -4    4.39    0.73 
  -6   7   4    3.59    0.65 
   5  -7  -4    1.41    0.40 
  -5   7   4    0.44    0.22 
  -5   7   4    0.66    0.34 
   4  -7  -4    9.64    0.84 
  -4   7   4   10.24    0.85 
   3  -7  -4    0.42    0.20 
  -3   7   4    0.48    0.12 
  -3   7   4    0.45    0.22 
   2  -7  -4    1.87    0.34 
  -2   7   4    1.54    0.18 
  -2   7   4    1.77    0.34 
   1  -7  -4    1.14    0.26 
  -1   7   4    0.85    0.24 
   0  -7  -4    9.09    0.78 
   0   7   4    9.78    0.78 
  -1  -7  -4    4.43    0.62 
  -2  -7  -4    8.23    0.91 
  -3  -7  -4    5.95    0.84 
  -4  -7  -4    0.50    0.46 
  -5  -7  -4    1.32    0.58 
  -6  -7  -4    2.23    0.75 
  -7  -7  -4   -0.23    0.63 
  -9   8   4   -0.18    0.55 
  -8   8   4    0.75    0.49 
  -7   8   4    0.06    0.35 
   6  -8  -4    0.35    0.34 
  -6   8   4   -0.08    0.28 
   5  -8  -4    6.24    0.73 
  -5   8   4    3.85    0.65 
   4  -8  -4    2.75    0.51 
  -4   8   4    2.80    0.52 
  -4   8   4    4.43    0.35 
   3  -8  -4    3.55    0.51 
  -3   8   4    3.91    0.54 
  -3   8   4    4.06    0.32 
   2  -8  -4    0.24    0.18 
  -2   8   4    0.41    0.21 
  -2   8   4    0.65    0.15 
   1  -8  -4    0.64    0.23 
  -1   8   4    0.88    0.20 
  -1   8   4    0.39    0.22 
   0  -8  -4    1.12    0.33 
   0   8   4    0.58    0.26 
  -1  -8  -4    0.46    0.33 
  -2  -8  -4    0.00    0.36 
  -3  -8  -4    0.09    0.43 
  -4  -8  -4    2.05    0.64 
  -5  -8  -4    0.68    0.57 
  -6  -8  -4    1.10    0.69 
  -7  -8  -4    0.25    0.71 
  -9   9   4   -0.21    0.53 
  -8   9   4    0.89    0.53 
  -7   9   4    0.02    0.37 
   6  -9  -4    3.30    0.62 
  -6   9   4    3.07    0.60 
   5  -9  -4    0.32    0.28 
  -5   9   4    0.16    0.31 
   4  -9  -4    4.93    0.65 
  -4   9   4    5.69    0.72 
   3  -9  -4    3.22    0.49 
  -3   9   4    3.51    0.32 
  -3   9   4    3.56    0.54 
   2  -9  -4    2.05    0.37 
  -2   9   4    2.32    0.28 
  -2   9   4    1.80    0.38 
   1  -9  -4    8.17    0.73 
  -1   9   4    6.92    0.74 
  -1   9   4    7.22    0.59 
   0  -9  -4    6.91    0.77 
   0   9   4    7.31    0.76 
  -1  -9  -4   -0.16    0.28 
  -2  -9  -4   -0.20    0.35 
  -3  -9  -4   -0.29    0.46 
  -4  -9  -4    1.53    0.66 
  -5  -9  -4    1.87    0.71 
  -6  -9  -4    0.42    0.67 
  -7  -9  -4    0.09    0.79 
  -9  10   4   -0.43    0.54 
  -8  10   4   -0.05    0.46 
  -7  10   4    0.28    0.41 
  -6  10   4    0.16    0.34 
   5 -10  -4    1.46    0.40 
  -5  10   4    1.82    0.49 
   4 -10  -4    0.43    0.26 
  -4  10   4    0.63    0.34 
   3 -10  -4    3.18    0.49 
  -3  10   4    2.21    0.46 
   2 -10  -4    4.33    0.53 
  -2  10   4    2.27    0.46 
  -2  10   4    4.55    0.41 
   1 -10  -4    1.50    0.34 
  -1  10   4    0.51    0.27 
  -1  10   4    2.05    0.34 
   0 -10  -4    1.84    0.46 
   0  10   4    1.40    0.38 
  -1 -10  -4    2.81    0.59 
  -2 -10  -4    3.34    0.69 
  -3 -10  -4    3.08    0.72 
  -4 -10  -4   -0.07    0.53 
  -5 -10  -4   -0.07    0.57 
  -6 -10  -4    0.01    0.67 
  -7 -10  -4   -0.20    0.72 
  -8  11   4    0.75    0.55 
  -7  11   4    1.06    0.53 
  -6  11   4    0.33    0.37 
   5 -11  -4   -0.15    0.22 
  -5  11   4    0.00    0.33 
   4 -11  -4   -0.04    0.24 
  -4  11   4    0.10    0.31 
   3 -11  -4    2.45    0.45 
  -3  11   4    1.84    0.44 
   2 -11  -4   -0.19    0.17 
  -2  11   4    0.20    0.26 
   1 -11  -4   12.48    1.09 
  -1  11   4   14.48    1.13 
  -1  11   4   17.52    1.09 
   0 -11  -4   -0.31    0.30 
   0  11   4    0.01    0.25 
  -1 -11  -4    1.55    0.51 
  -2 -11  -4    0.87    0.52 
  -3 -11  -4    0.90    0.51 
  -4 -11  -4    2.78    0.84 
  -5 -11  -4   -0.04    0.68 
  -6 -11  -4    0.25    0.73 
  -8  12   4    0.41    0.58 
  -7  12   4    0.00    0.46 
  -6  12   4    1.88    0.59 
  -5  12   4    0.04    0.34 
   4 -12  -4    0.50    0.28 
  -4  12   4    0.06    0.29 
   3 -12  -4    0.20    0.23 
  -3  12   4   -0.03    0.23 
   2 -12  -4    0.19    0.25 
  -2  12   4    0.45    0.30 
   1 -12  -4   -0.23    0.26 
  -1  12   4    0.18    0.24 
  -1  12   4    0.01    0.24 
   0 -12  -4    2.46    0.58 
   0  12   4    1.75    0.47 
  -1 -12  -4    0.24    0.41 
  -2 -12  -4    0.07    0.38 
  -3 -12  -4    0.13    0.49 
  -4 -12  -4    0.12    0.52 
  -5 -12  -4    0.38    0.75 
  -6 -12  -4    0.89    0.81 
  -8  13   4    0.27    0.59 
  -7  13   4   -0.36    0.43 
  -6  13   4    0.91    0.51 
  -5  13   4   -0.04    0.38 
   4 -13  -4    0.87    0.35 
  -4  13   4    1.19    0.43 
   3 -13  -4    0.42    0.30 
  -3  13   4    0.35    0.31 
   2 -13  -4    0.66    0.35 
  -2  13   4    0.55    0.33 
   1 -13  -4    7.39    0.84 
  -1  13   4    7.42    0.86 
   0 -13  -4    0.80    0.39 
   0  13   4   -0.16    0.33 
  -1 -13  -4    3.16    0.69 
  -2 -13  -4    0.09    0.45 
  -3 -13  -4   -0.09    0.48 
  -4 -13  -4   -0.29    0.46 
  -5 -13  -4   -0.02    0.70 
  -8  14   4   -0.08    0.53 
  -7  14   4    0.69    0.53 
  -6  14   4    1.32    0.57 
  -5  14   4    0.12    0.41 
  -4  14   4    0.32    0.33 
   3 -14  -4    1.01    0.44 
  -3  14   4    0.98    0.41 
   2 -14  -4    0.30    0.31 
  -2  14   4    0.26    0.28 
   1 -14  -4    3.93    0.65 
  -1  14   4    4.70    0.73 
   0 -14  -4    1.44    0.46 
   0  14   4    0.32    0.40 
  -1 -14  -4    0.02    0.34 
  -2 -14  -4    1.88    0.64 
  -3 -14  -4   -0.22    0.44 
  -4 -14  -4    0.38    0.55 
  -5 -14  -4   -0.39    0.67 
  -7  15   4    0.50    0.56 
  -6  15   4    0.55    0.50 
  -5  15   4   -0.26    0.37 
  -4  15   4    0.40    0.41 
   3 -15  -4    1.70    0.54 
  -3  15   4    2.00    0.53 
   2 -15  -4    2.56    0.54 
  -2  15   4    2.41    0.54 
   1 -15  -4    6.98    0.86 
  -1  15   4    5.19    0.79 
   0 -15  -4    0.41    0.38 
   0  15   4    0.09    0.33 
  -1 -15  -4    1.21    0.50 
  -2 -15  -4    0.20    0.50 
  -3 -15  -4    0.17    0.53 
  -4 -15  -4    2.55    0.86 
  -7  16   4    0.16    0.49 
  -6  16   4   -0.11    0.50 
  -5  16   4    0.35    0.42 
  -4  16   4    0.75    0.48 
  -3  16   4    0.56    0.39 
   2 -16  -4    5.93    0.81 
  -2  16   4    4.98    0.80 
   1 -16  -4    1.03    0.44 
  -1  16   4    0.92    0.42 
   0 -16  -4    0.69    0.42 
   0  16   4   -0.23    0.37 
  -1 -16  -4    1.10    0.54 
  -2 -16  -4    1.26    0.62 
  -3 -16  -4    0.53    0.61 
  -4 -16  -4    0.71    0.73 
  -6  17   4   -0.08    0.52 
  -5  17   4   -0.45    0.36 
  -4  17   4    0.28    0.39 
  -3  17   4    1.00    0.46 
   2 -17  -4    0.52    0.44 
  -2  17   4    0.18    0.36 
   1 -17  -4    1.93    0.51 
  -1  17   4    0.96    0.50 
   0 -17  -4    0.19    0.38 
   0  17   4   -0.55    0.40 
  -1 -17  -4    0.43    0.51 
  -2 -17  -4   -0.01    0.49 
  -3 -17  -4    0.43    0.63 
  -6  18   4    0.42    0.62 
  -5  18   4   -0.63    0.41 
  -4  18   4    0.68    0.49 
  -3  18   4    0.00    0.41 
  -2  18   4    0.06    0.38 
   1 -18  -4    0.16    0.38 
  -1  18   4    0.73    0.47 
   0 -18  -4    0.24    0.46 
   0  18   4    0.44    0.51 
  -1 -18  -4    1.15    0.62 
  -2 -18  -4   -0.60    0.55 
  -5  19   4    0.59    0.62 
  -4  19   4   -0.19    0.42 
  -3  19   4   -0.30    0.39 
  -2  19   4    0.40    0.49 
  -1  19   4   -0.04    0.48 
   0 -19  -4    0.33    0.47 
  -1 -19  -4    0.72    0.62 
  -4  20   4   -0.12    0.57 
  -3  20   4   -0.17    0.50 
  -2  20   4    0.20    0.55 
  -1  20   4   -0.41    0.53 
   0 -20  -4   -0.36    0.60 
   1  20  -5   -0.45    0.71 
   0  20  -5    0.81    0.76 
  -1  20  -5    0.22    0.75 
  -2  20  -5    0.81    0.72 
  -4  20  -5    0.39    0.60 
   2  19  -5   -0.32    0.66 
   1  19  -5   -0.16    0.63 
   0  19  -5    0.51    0.64 
  -1  19  -5   -0.19    0.54 
  -2  19  -5    0.54    0.60 
  -3  19  -5   -0.39    0.56 
  -3  19  -5    0.12    0.45 
  -4  19  -5   -0.03    0.50 
  -5  19  -5    0.48    0.59 
   3  18  -5    0.34    0.68 
  -3 -18   5    2.00    0.89 
   2  18  -5   -0.40    0.62 
   1  18  -5   -0.47    0.52 
   0  18  -5    0.77    0.61 
  -1  18  -5    1.24    0.65 
  -2  18  -5   -0.28    0.40 
  -2  18  -5    0.04    0.52 
  -3  18  -5    0.32    0.43 
  -3  18  -5   -0.15    0.51 
  -4  18  -5   -0.04    0.58 
  -4  18  -5    0.25    0.47 
  -5  18  -5    0.69    0.54 
  -4 -17   5    0.25    0.73 
   3  17  -5    0.50    0.64 
  -3 -17   5    0.58    0.67 
   2  17  -5    0.10    0.59 
  -2 -17   5   -0.56    0.49 
   1  17  -5    0.15    0.51 
   0  17  -5    0.03    0.46 
  -1  17  -5    0.34    0.52 
  -2  17  -5    0.11    0.36 
  -2  17  -5   -0.20    0.46 
  -3  17  -5    1.56    0.58 
  -3  17  -5    1.42    0.53 
  -4  17  -5    0.00    0.39 
  -4  17  -5    0.86    0.53 
  -5  17  -5    0.50    0.49 
  -5  17  -5    0.73    0.61 
  -6  17  -5    0.07    0.52 
   4  16  -5   -0.59    0.56 
  -4 -16   5   -0.46    0.55 
   3  16  -5    0.22    0.59 
  -3 -16   5   -0.29    0.50 
   2  16  -5    0.05    0.50 
  -2 -16   5   -0.40    0.44 
   1  16  -5   -0.22    0.43 
  -1 -16   5   -0.09    0.48 
   0  16  -5    0.54    0.46 
  -1  16  -5    1.13    0.52 
  -1  16  -5    1.11    0.42 
  -2  16  -5   -0.35    0.34 
  -2  16  -5   -0.18    0.33 
  -3  16  -5   -0.46    0.33 
  -3  16  -5   -0.12    0.40 
  -4  16  -5    1.03    0.51 
  -4  16  -5    1.10    0.49 
  -5  16  -5    0.37    0.51 
  -5  16  -5    0.50    0.46 
  -6  16  -5    0.56    0.50 
  -7  16  -5   -0.23    0.59 
  -5 -15   5    0.08    0.62 
   4  15  -5    0.15    0.63 
  -4 -15   5    0.12    0.50 
   3  15  -5    0.46    0.59 
  -3 -15   5   -0.33    0.46 
   2  15  -5   -0.14    0.41 
  -2 -15   5    0.50    0.46 
   1  15  -5    0.19    0.40 
  -1 -15   5   -0.02    0.44 
   0  15  -5    1.81    0.56 
  -1  15  -5    0.27    0.39 
  -1  15  -5    0.30    0.32 
  -2  15  -5    0.52    0.40 
  -2  15  -5    0.46    0.36 
  -3  15  -5    1.96    0.54 
  -3  15  -5    1.36    0.46 
  -4  15  -5    0.56    0.42 
  -4  15  -5    0.20    0.35 
  -5  15  -5    0.83    0.45 
  -5  15  -5    0.07    0.40 
  -6  15  -5    0.16    0.43 
  -6  15  -5    0.68    0.47 
  -7  15  -5    3.07    0.83 
  -5 -14   5   -0.58    0.50 
   4  14  -5   -0.31    0.54 
  -4 -14   5    0.39    0.46 
   3  14  -5    0.69    0.56 
  -3 -14   5    0.38    0.46 
   2  14  -5   -0.13    0.35 
  -2 -14   5    0.00    0.38 
   1  14  -5    1.17    0.49 
  -1 -14   5    1.12    0.43 
   0  14  -5    1.97    0.39 
   0  14  -5    2.15    0.55 
   0 -14   5    1.27    0.40 
  -1  14  -5    0.42    0.35 
  -1  14  -5   -0.19    0.29 
  -2  14  -5    2.86    0.61 
  -2  14  -5    2.53    0.51 
  -3  14  -5    0.17    0.32 
  -3  14  -5    0.06    0.34 
  -4  14  -5    0.56    0.40 
  -4  14  -5    0.15    0.30 
  -5  14  -5   -0.25    0.28 
  -5  14  -5   -0.11    0.34 
  -6  14  -5    2.78    0.65 
  -6  14  -5    2.89    0.70 
  -7  14  -5    0.43    0.52 
  -7  14  -5    0.01    0.47 
  -6 -13   5   -0.04    0.65 
  -5 -13   5   -0.09    0.43 
   4  13  -5    0.16    0.52 
  -4 -13   5   -0.01    0.39 
   3  13  -5    0.36    0.48 
  -3 -13   5    0.38    0.42 
   2  13  -5   -0.08    0.33 
  -2 -13   5    0.10    0.35 
   1  13  -5    0.06    0.28 
  -1 -13   5    0.75    0.39 
   0  13  -5    2.64    0.41 
   0  13  -5    1.45    0.46 
   0 -13   5    1.60    0.39 
  -1  13  -5    0.41    0.27 
  -1  13  -5    0.29    0.32 
  -2  13  -5    2.05    0.46 
  -2  13  -5    1.98    0.48 
  -3  13  -5    1.81    0.51 
  -3  13  -5    2.03    0.50 
  -4  13  -5    0.75    0.40 
  -4  13  -5    0.90    0.40 
  -5  13  -5   10.11    1.14 
  -5  13  -5    9.61    1.03 
  -6  13  -5    0.32    0.39 
  -6  13  -5   -0.03    0.38 
  -7  13  -5    0.59    0.51 
  -7  13  -5    0.35    0.44 
  -8  13  -5    0.60    0.58 
  -8  13  -5    0.87    0.67 
  -6 -12   5    0.01    0.52 
  -5 -12   5   -0.28    0.37 
   4  12  -5    0.49    0.53 
  -4 -12   5    0.00    0.34 
   3  12  -5    0.79    0.49 
  -3 -12   5    0.70    0.41 
   2  12  -5    3.25    0.69 
  -2 -12   5    2.67    0.56 
   1  12  -5   -0.10    0.30 
  -1 -12   5   -0.19    0.24 
   0  12  -5    3.47    0.61 
   0  12  -5    3.37    0.43 
   0 -12   5    2.73    0.44 
  -1  12  -5    0.93    0.36 
  -1  12  -5    0.71    0.27 
   1 -12   5    0.19    0.27 
  -2  12  -5    0.20    0.24 
  -2  12  -5   -0.30    0.22 
  -3  12  -5   -0.12    0.27 
  -3  12  -5   -0.41    0.23 
  -4  12  -5    2.33    0.51 
  -4  12  -5    2.27    0.53 
  -5  12  -5    4.89    0.73 
  -6  12  -5    1.03    0.46 
  -7  12  -5    0.27    0.47 
  -8  12  -5    0.16    0.50 
  -7 -11   5    0.65    0.67 
  -6 -11   5    0.35    0.51 
  -5 -11   5   -0.12    0.32 
   4  11  -5    0.40    0.49 
  -4 -11   5    0.42    0.37 
   3  11  -5    2.30    0.64 
  -3 -11   5    1.85    0.50 
   2  11  -5   -0.05    0.33 
  -2 -11   5   -0.10    0.25 
   1  11  -5    0.43    0.23 
   1  11  -5    0.46    0.30 
  -1 -11   5    0.61    0.30 
   0  11  -5    3.10    0.57 
   0  11  -5    3.51    0.43 
   0 -11   5    3.78    0.48 
  -1  11  -5   -0.16    0.23 
  -1  11  -5    0.11    0.20 
   1 -11   5   -0.02    0.18 
  -2  11  -5    0.87    0.29 
  -2  11  -5    1.43    0.43 
  -3  11  -5    0.41    0.29 
  -3  11  -5   -0.01    0.24 
  -4  11  -5    0.59    0.36 
  -5  11  -5    3.49    0.62 
  -6  11  -5    1.22    0.47 
  -7  11  -5    0.09    0.41 
  -8  11  -5    0.39    0.53 
  -7 -10   5    0.28    0.51 
  -6 -10   5    0.60    0.48 
  -5 -10   5    0.58    0.40 
   4  10  -5    0.25    0.44 
  -4 -10   5    0.20    0.34 
   3  10  -5    3.32    0.69 
  -3 -10   5    2.98    0.57 
   2  10  -5   -0.01    0.26 
  -2 -10   5   -0.05    0.23 
   1  10  -5    0.95    0.36 
   1  10  -5    1.05    0.23 
  -1 -10   5    1.35    0.32 
   0  10  -5    3.31    0.52 
   0  10  -5    3.81    0.41 
   0 -10   5    2.45    0.40 
  -1  10  -5    1.43    0.34 
  -1  10  -5    1.34    0.31 
   1 -10   5    0.89    0.24 
  -2  10  -5    4.09    0.56 
  -2  10  -5    4.08    0.56 
  -3  10  -5    2.06    0.45 
  -4  10  -5   -0.03    0.26 
  -5  10  -5    2.43    0.54 
  -6  10  -5    0.92    0.42 
  -7  10  -5    0.55    0.45 
  -8  10  -5    0.14    0.51 
  -7  -9   5    0.34    0.57 
  -6  -9   5    0.63    0.40 
  -5  -9   5    8.35    1.05 
   4   9  -5    1.53    0.54 
  -4  -9   5    0.73    0.40 
   3   9  -5    0.23    0.31 
  -3  -9   5    0.46    0.31 
   2   9  -5    4.00    0.66 
  -2  -9   5    3.50    0.56 
   1   9  -5    0.97    0.28 
   1   9  -5    1.03    0.21 
  -1  -9   5    1.12    0.31 
   0   9  -5    0.94    0.22 
   0   9  -5    0.98    0.29 
   0  -9   5    0.59    0.21 
  -1   9  -5    8.29    0.69 
  -1   9  -5    9.34    0.75 
   1  -9   5    8.37    0.61 
  -2   9  -5    1.58    0.34 
  -3   9  -5   -0.21    0.18 
  -4   9  -5    6.37    0.74 
  -5   9  -5    5.21    0.70 
  -6   9  -5    2.05    0.55 
  -7   9  -5   -0.02    0.39 
  -8   9  -5    0.59    0.56 
  -8  -8   5    0.18    0.62 
  -7  -8   5    0.28    0.53 
  -6  -8   5    2.17    0.61 
  -5  -8   5    0.49    0.34 
   4   8  -5    0.42    0.40 
  -4  -8   5    0.81    0.37 
   3   8  -5    0.29    0.30 
  -3  -8   5    0.46    0.29 
   2   8  -5    1.10    0.35 
  -2  -8   5    0.91    0.31 
   1   8  -5    4.10    0.58 
   1   8  -5    4.39    0.36 
  -1  -8   5    5.31    0.55 
   0   8  -5    1.69    0.26 
   0   8  -5    1.83    0.36 
   0  -8   5    2.36    0.34 
  -1   8  -5    0.13    0.16 
   1  -8   5   -0.07    0.11 
  -2   8  -5    3.12    0.46 
  -3   8  -5    0.74    0.27 
  -4   8  -5    1.91    0.41 
  -5   8  -5    4.27    0.66 
  -6   8  -5    0.31    0.36 
  -7   8  -5   -0.01    0.39 
  -8   8  -5    0.28    0.49 
  -8  -7   5   -0.56    0.47 
  -7  -7   5    5.15    1.00 
  -6  -7   5    0.17    0.47 
  -5  -7   5    1.15    0.44 
   4   7  -5    0.18    0.37 
  -4  -7   5   -0.02    0.26 
   3   7  -5    0.26    0.28 
  -3  -7   5    0.74    0.33 
   2   7  -5   17.08    1.31 
  -2  -7   5   19.29    1.29 
   1   7  -5   13.12    0.97 
   1   7  -5   11.96    0.76 
  -1  -7   5   13.13    0.90 
   0   7  -5   23.57    1.38 
   0   7  -5   21.92    1.47 
   0  -7   5   24.15    1.44 
  -1   7  -5    3.27    0.43 
   1  -7   5    3.41    0.31 
  -2   7  -5   -0.14    0.15 
  -3   7  -5   11.61    0.91 
  -4   7  -5    1.33    0.36 
  -5   7  -5    0.10    0.30 
  -6   7  -5    0.96    0.41 
  -7   7  -5    0.41    0.41 
  -8   7  -5   -0.28    0.43 
  -9   7  -5    0.65    0.61 
  -8  -6   5    0.46    0.66 
  -7  -6   5    2.99    0.78 
  -6  -6   5    1.69    0.58 
  -5  -6   5    0.49    0.38 
   4   6  -5    2.02    0.54 
  -4  -6   5    3.00    0.54 
   3   6  -5   18.35    1.47 
   3   6  -5   19.82    1.45 
   2   6  -5    2.99    0.50 
   2   6  -5    2.26    0.47 
   1   6  -5   70.90    4.03 
   1   6  -5   71.37    4.15 
   1   6  -5   71.53    3.84 
   0   6  -5    2.84    0.39 
   0   6  -5    2.88    0.38 
  -1   6  -5    1.08    0.25 
  -1   6  -5    1.09    0.20 
  -2   6  -5   15.03    1.04 
  -3   6  -5    1.20    0.33 
  -4   6  -5   21.33    1.46 
  -5   6  -5    1.60    0.41 
  -6   6  -5    0.07    0.31 
  -7   6  -5    0.39    0.42 
  -8   6  -5   -0.07    0.50 
  -9   6  -5    0.93    0.63 
  -8  -5   5   -0.30    0.56 
  -7  -5   5    0.84    0.56 
  -6  -5   5    0.35    0.41 
  -5  -5   5    2.59    0.57 
   4   5  -5    1.42    0.50 
   4   5  -5    1.59    0.46 
   3   5  -5    9.33    0.96 
   3   5  -5   10.74    1.06 
   2   5  -5   25.54    1.75 
   2   5  -5   25.93    1.69 
   1   5  -5   23.53    1.51 
   1   5  -5   22.53    1.25 
   1   5  -5   22.30    1.44 
   0   5  -5    3.29    0.38 
   0   5  -5    3.29    0.39 
  -1   5  -5    9.35    0.71 
  -1   5  -5   10.36    0.66 
  -2   5  -5    0.35    0.19 
  -3   5  -5   15.20    1.10 
  -3   5  -5   15.79    0.91 
  -4   5  -5    6.83    0.71 
  -4   5  -5    6.52    0.51 
  -5   5  -5    1.52    0.42 
  -6   5  -5   -0.42    0.29 
  -7   5  -5    0.56    0.43 
  -8   5  -5    1.07    0.60 
  -9   5  -5    0.28    0.60 
  -8  -4   5    3.26    0.83 
  -7  -4   5    0.63    0.50 
  -6  -4   5    0.40    0.40 
   5   4  -5    2.64    0.67 
   4   4  -5    0.93    0.41 
   3   4  -5   64.12    3.80 
   3   4  -5   60.08    3.65 
   2   4  -5    2.37    0.40 
   2   4  -5    1.56    0.36 
   1   4  -5   67.94    3.82 
   1   4  -5   64.20    3.69 
   0   4  -5   27.10    1.73 
   0   4  -5   31.43    1.73 
  -1   4  -5  104.85    5.97 
  -1   4  -5  114.37    6.02 
  -2   4  -5   82.44    4.70 
  -2   4  -5   86.10    4.63 
  -3   4  -5   30.43    1.90 
  -3   4  -5   31.61    1.79 
  -4   4  -5    0.22    0.19 
  -4   4  -5   -0.20    0.19 
  -5   4  -5    1.97    0.37 
  -5   4  -5    1.47    0.42 
  -6   4  -5    1.14    0.51 
  -7   4  -5    0.71    0.49 
  -8   4  -5    4.28    0.98 
  -9   4  -5    0.24    0.59 
  -9  -3   5    0.81    0.66 
  -8  -3   5   -0.23    0.52 
  -7  -3   5    0.21    0.44 
   6   3  -5    0.13    0.46 
   5   3  -5   -0.21    0.29 
   4   3  -5    0.21    0.28 
   3   3  -5    7.60    0.84 
   3   3  -5    9.05    0.81 
  -3  -3   5    6.87    0.45 
   2   3  -5    8.07    0.78 
   2   3  -5    7.58    0.65 
   1   3  -5   13.96    0.93 
   1   3  -5   11.53    0.83 
   0   3  -5  124.03    6.45 
   0   3  -5  115.21    6.60 
  -1   3  -5    2.97    0.36 
  -1   3  -5    3.60    0.30 
  -2   3  -5   -0.04    0.12 
  -2   3  -5   -0.04    0.09 
  -3   3  -5   16.86    1.13 
  -3   3  -5   16.03    1.03 
  -4   3  -5    1.09    0.27 
  -4   3  -5    0.81    0.27 
  -5   3  -5    4.62    0.55 
  -5   3  -5    5.36    0.71 
  -6   3  -5    0.36    0.37 
  -7   3  -5    2.10    0.60 
  -8   3  -5    4.91    1.01 
  -9   3  -5    0.61    0.62 
  -9  -2   5   -0.22    0.63 
  -8  -2   5    0.43    0.49 
  -7  -2   5    0.06    0.33 
   6   2  -5    0.31    0.42 
   5   2  -5   -0.32    0.27 
   4   2  -5    8.08    0.95 
   3   2  -5    0.29    0.22 
   3   2  -5    0.09    0.17 
  -3  -2   5    0.52    0.12 
   2   2  -5    1.67    0.30 
   2   2  -5    1.59    0.34 
  -2  -2   5    1.40    0.14 
   1   2  -5   51.91    3.02 
   1   2  -5   51.59    2.88 
   0   2  -5   15.23    1.01 
   0   2  -5   16.31    0.97 
  -1   2  -5   13.59    0.97 
  -1   2  -5   16.77    0.96 
  -2   2  -5   95.68    5.36 
  -2   2  -5   99.03    5.34 
  -3   2  -5    1.40    0.29 
  -3   2  -5    1.39    0.31 
  -4   2  -5    0.79    0.28 
  -4   2  -5    1.07    0.30 
  -5   2  -5    0.88    0.34 
  -5   2  -5    0.85    0.35 
  -6   2  -5    9.47    1.06 
  -6   2  -5    8.29    0.85 
  -7   2  -5    2.86    0.69 
  -8   2  -5    4.02    0.90 
  -9   2  -5    0.08    0.57 
  -9  -1   5    0.46    0.63 
  -8  -1   5    0.25    0.51 
   7   1  -5    1.28    0.60 
   6   1  -5   -0.21    0.32 
   5   1  -5    4.26    0.74 
   4   1  -5   -0.25    0.19 
  -4  -1   5    0.22    0.13 
   3   1  -5    1.62    0.38 
   3   1  -5    1.39    0.34 
  -3  -1   5    1.92    0.22 
   2   1  -5    8.74    0.75 
   2   1  -5    8.86    0.66 
  -2  -1   5    8.64    0.54 
   1   1  -5    0.12    0.16 
   1   1  -5    0.37    0.13 
   0   1  -5   91.34    5.20 
   0   1  -5   95.62    5.04 
  -1   1  -5    6.73    0.48 
  -1   1  -5    6.16    0.49 
  -2   1  -5    0.14    0.15 
  -2   1  -5    0.01    0.13 
  -3   1  -5   14.99    1.06 
  -3   1  -5   15.16    1.03 
  -4   1  -5    1.00    0.30 
  -4   1  -5    0.69    0.30 
  -5   1  -5    0.21    0.30 
  -5   1  -5    0.09    0.27 
  -6   1  -5    5.66    0.83 
  -6   1  -5    4.24    0.66 
  -7   1  -5    6.28    0.99 
  -8   1  -5    2.82    0.80 
  -9   1  -5    0.85    0.60 
  -9   0   5    0.39    0.60 
  -8   0   5    0.58    0.50 
   7   0  -5    4.30    0.87 
   6   0  -5    3.01    0.70 
   5   0  -5    0.40    0.35 
  -5   0   5    0.57    0.23 
   4   0  -5   23.38    1.75 
  -4   0   5   24.90    1.47 
   3   0  -5    3.02    0.52 
  -3   0   5    4.17    0.36 
   2   0  -5   17.88    1.27 
  -2   0   5   18.90    1.09 
   1   0  -5   67.31    3.85 
   0   0  -5   38.23    2.31 
   0   0  -5   41.19    2.21 
  -1   0  -5    0.39    0.15 
  -1   0  -5    0.25    0.14 
  -2   0  -5    0.00    0.18 
  -2   0  -5    0.10    0.13 
  -3   0  -5   16.77    1.17 
  -3   0  -5   17.64    1.18 
  -4   0  -5    4.49    0.58 
  -4   0  -5    5.30    0.65 
  -5   0  -5    2.67    0.57 
  -5   0  -5    2.68    0.53 
  -6   0  -5    0.68    0.47 
  -6   0  -5   -0.28    0.37 
  -7   0  -5    0.16    0.45 
  -7   0  -5   -0.73    0.44 
  -8   0  -5    0.25    0.60 
  -9   1   5   -0.19    0.55 
   8  -1  -5    1.25    0.68 
   7  -1  -5    1.06    0.54 
   6  -1  -5    0.16    0.39 
  -6   1   5    0.76    0.30 
   5  -1  -5   -0.16    0.24 
  -5   1   5    0.58    0.21 
   4  -1  -5    0.70    0.29 
  -4   1   5    0.47    0.19 
   3  -1  -5    2.71    0.47 
  -3   1   5    3.43    0.35 
   2  -1  -5   15.45    1.01 
   2  -1  -5   18.34    1.19 
  -2   1   5   17.23    1.03 
   1  -1  -5   29.15    1.60 
   1  -1  -5   30.11    1.78 
  -1   1   5   27.47    1.66 
   0  -1  -5    2.71    0.33 
  -1  -1  -5   50.94    3.00 
  -1  -1  -5   53.96    2.92 
  -2  -1  -5   44.64    2.59 
  -2  -1  -5   45.28    2.65 
  -3  -1  -5    9.74    0.83 
  -4  -1  -5    1.39    0.40 
  -5  -1  -5    5.83    0.75 
  -6  -1  -5   -0.26    0.39 
  -7  -1  -5   -0.96    0.44 
  -7  -1  -5   -0.27    0.40 
  -8  -1  -5    0.96    0.63 
  -9   2   5    0.91    0.66 
   8  -2  -5    1.03    0.60 
   7  -2  -5    1.67    0.61 
  -7   2   5    0.52    0.34 
   6  -2  -5    0.44    0.37 
  -6   2   5    0.31    0.22 
   5  -2  -5    0.34    0.27 
  -5   2   5    0.49    0.24 
   4  -2  -5   12.38    1.07 
  -4   2   5   13.33    0.90 
   3  -2  -5   35.71    2.26 
  -3   2   5   35.15    2.06 
   2  -2  -5   35.86    2.24 
   2  -2  -5   36.85    2.04 
  -2   2   5   36.75    2.10 
   1  -2  -5    2.12    0.18 
   1  -2  -5    1.91    0.31 
  -1   2   5    2.43    0.30 
   0  -2  -5   64.88    3.81 
   0  -2  -5   69.50    3.64 
  -1  -2  -5    5.42    0.45 
  -1  -2  -5    6.07    0.52 
  -2  -2  -5   57.64    3.37 
  -3  -2  -5    0.69    0.33 
  -4  -2  -5    8.41    0.85 
  -5  -2  -5    1.60    0.52 
  -6  -2  -5    0.97    0.52 
  -7  -2  -5    0.74    0.57 
  -8  -2  -5   -0.15    0.61 
  -9   3   5    0.85    0.61 
   8  -3  -5   -0.21    0.53 
   7  -3  -5    0.04    0.41 
  -7   3   5    0.42    0.35 
   6  -3  -5    5.21    0.85 
  -6   3   5    6.02    0.68 
   5  -3  -5    2.52    0.53 
  -5   3   5    2.09    0.39 
   4  -3  -5   15.13    1.23 
  -4   3   5   16.23    1.08 
   3  -3  -5   42.50    2.59 
  -3   3   5   41.29    2.42 
   2  -3  -5    5.46    0.54 
  -2   3   5    2.77    0.37 
   1  -3  -5    1.99    0.16 
   1  -3  -5    2.50    0.35 
  -1   3   5    2.83    0.34 
   0  -3  -5   29.73    1.66 
   0  -3  -5   29.60    1.80 
  -1  -3  -5    2.15    0.37 
  -2  -3  -5   -0.23    0.27 
  -3  -3  -5    0.22    0.29 
  -4  -3  -5    1.78    0.48 
  -5  -3  -5    0.04    0.40 
  -6  -3  -5    1.36    0.56 
  -7  -3  -5    0.07    0.55 
  -8  -3  -5    0.18    0.70 
   8  -4  -5    0.26    0.51 
  -8   4   5    0.08    0.37 
   7  -4  -5    1.48    0.61 
  -7   4   5    1.80    0.47 
   6  -4  -5    0.50    0.42 
  -6   4   5    0.27    0.30 
   5  -4  -5    6.68    0.87 
  -5   4   5    7.96    0.74 
   4  -4  -5    2.51    0.48 
  -4   4   5    2.09    0.38 
   3  -4  -5   10.00    0.88 
  -3   4   5   11.83    0.83 
   2  -4  -5   40.38    2.43 
  -2   4   5   39.67    2.33 
   1  -4  -5    0.24    0.14 
  -1   4   5    0.09    0.14 
   0  -4  -5   15.34    1.04 
  -1  -4  -5  156.81    8.71 
  -2  -4  -5    1.17    0.40 
  -3  -4  -5    5.39    0.72 
  -4  -4  -5   18.88    1.46 
  -5  -4  -5    3.64    0.73 
  -6  -4  -5   -0.15    0.46 
  -7  -4  -5    0.09    0.56 
  -8  -4  -5   -0.35    0.64 
   8  -5  -5    1.56    0.70 
  -8   5   5    1.11    0.53 
   7  -5  -5   -0.05    0.41 
  -7   5   5    0.28    0.34 
   6  -5  -5   38.42    2.63 
  -6   5   5   38.19    2.32 
  -6   5   5   37.96    2.42 
   5  -5  -5   14.50    1.23 
  -5   5   5   14.92    1.11 
  -5   5   5   15.21    1.01 
   4  -5  -5   37.57    2.46 
  -4   5   5   40.14    2.35 
  -4   5   5   38.33    2.16 
   3  -5  -5   18.21    1.33 
  -3   5   5   19.17    1.06 
  -3   5   5   18.80    1.26 
   2  -5  -5   20.78    1.43 
  -2   5   5   23.00    1.41 
   1  -5  -5   33.52    2.11 
   1  -5  -5   36.19    1.88 
  -1   5   5   33.69    2.08 
   0  -5  -5    1.90    0.35 
   0   5   5    2.48    0.41 
  -1  -5  -5   31.26    1.98 
  -2  -5  -5    4.17    0.63 
  -3  -5  -5    3.77    0.66 
  -4  -5  -5    6.79    0.93 
  -5  -5  -5    4.09    0.79 
  -6  -5  -5    0.41    0.53 
  -7  -5  -5    0.62    0.68 
  -8  -5  -5    1.30    0.86 
  -8   6   5   -0.04    0.40 
   7  -6  -5    1.89    0.62 
  -7   6   5    2.87    0.62 
   6  -6  -5   13.31    1.33 
  -6   6   5   15.09    1.18 
   5  -6  -5   27.18    1.78 
  -5   6   5   21.00    1.58 
  -5   6   5   24.04    1.45 
   4  -6  -5    0.09    0.21 
   3  -6  -5    0.42    0.24 
  -3   6   5    0.28    0.20 
   2  -6  -5    3.10    0.44 
  -2   6   5    2.50    0.41 
   1  -6  -5   17.30    1.21 
  -1   6   5   18.99    1.23 
   0  -6  -5    0.43    0.22 
   0   6   5    0.23    0.22 
  -1  -6  -5   24.21    1.64 
  -2  -6  -5   -0.05    0.29 
  -3  -6  -5    1.73    0.54 
  -4  -6  -5   -0.17    0.46 
  -5  -6  -5    0.71    0.49 
  -6  -6  -5    0.73    0.57 
  -7  -6  -5    0.36    0.72 
  -9   7   5    0.72    0.58 
  -8   7   5    0.59    0.44 
   7  -7  -5    0.38    0.47 
  -7   7   5    0.46    0.38 
   6  -7  -5    0.96    0.48 
  -6   7   5    0.68    0.40 
   5  -7  -5    0.27    0.28 
  -5   7   5   -0.06    0.27 
   4  -7  -5    3.87    0.60 
  -4   7   5    4.42    0.35 
  -4   7   5    5.14    0.63 
   3  -7  -5    0.16    0.18 
  -3   7   5    0.22    0.20 
   2  -7  -5    1.27    0.30 
  -2   7   5    1.44    0.32 
   1  -7  -5    0.32    0.19 
  -1   7   5   -0.07    0.17 
   0  -7  -5    9.97    0.84 
   0   7   5   10.97    0.87 
  -1  -7  -5   -0.09    0.22 
  -2  -7  -5    5.65    0.80 
  -3  -7  -5    5.27    0.83 
  -4  -7  -5    0.66    0.51 
  -5  -7  -5    2.05    0.74 
  -6  -7  -5    0.46    0.63 
  -7  -7  -5    0.30    0.70 
  -9   8   5   -0.48    0.53 
  -8   8   5   -0.04    0.44 
   7  -8  -5    0.36    0.54 
  -7   8   5    0.82    0.46 
   6  -8  -5    5.59    0.87 
  -6   8   5    7.59    0.89 
   5  -8  -5   12.77    1.12 
  -5   8   5   13.55    1.12 
   4  -8  -5    0.22    0.25 
  -4   8   5    0.59    0.31 
   3  -8  -5    0.85    0.28 
  -3   8   5    0.37    0.25 
   2  -8  -5    4.27    0.54 
  -2   8   5    4.99    0.59 
   1  -8  -5    4.87    0.56 
  -1   8   5    4.01    0.55 
   0  -8  -5    8.71    0.84 
   0   8   5    9.43    0.88 
  -1  -8  -5    3.89    0.62 
  -2  -8  -5    0.37    0.42 
  -3  -8  -5    2.17    0.68 
  -4  -8  -5   10.79    1.26 
  -5  -8  -5    0.35    0.61 
  -6  -8  -5    1.99    0.79 
  -7  -8  -5   -0.27    0.70 
  -9   9   5    0.59    0.57 
  -8   9   5    0.64    0.51 
  -7   9   5    1.26    0.50 
   6  -9  -5    2.12    0.61 
  -6   9   5    0.85    0.43 
   5  -9  -5    0.85    0.37 
  -5   9   5    0.09    0.28 
   4  -9  -5    0.06    0.22 
  -4   9   5    0.21    0.28 
   3  -9  -5    4.82    0.61 
  -3   9   5    3.60    0.58 
   2  -9  -5    0.65    0.24 
  -2   9   5    0.63    0.27 
   1  -9  -5    1.45    0.34 
  -1   9   5    1.38    0.36 
   0  -9  -5    0.37    0.26 
   0   9   5    0.40    0.24 
  -1  -9  -5    1.25    0.44 
  -2  -9  -5    0.13    0.40 
  -3  -9  -5    2.04    0.68 
  -4  -9  -5   -0.04    0.50 
  -5  -9  -5    0.51    0.64 
  -6  -9  -5    0.75    0.72 
  -7  -9  -5    0.73    0.85 
  -9  10   5   -0.39    0.51 
  -8  10   5    0.61    0.57 
  -7  10   5   -0.08    0.37 
   6 -10  -5   -0.02    0.42 
  -6  10   5   -0.03    0.32 
   5 -10  -5    2.54    0.52 
  -5  10   5    1.01    0.43 
   4 -10  -5    0.71    0.31 
  -4  10   5    1.36    0.39 
   3 -10  -5    0.71    0.28 
  -3  10   5    0.30    0.27 
   2 -10  -5    2.43    0.42 
  -2  10   5    2.77    0.50 
   1 -10  -5    9.82    0.81 
  -1  10   5    7.77    0.84 
   0 -10  -5    1.19    0.39 
   0  10   5    1.97    0.46 
  -1 -10  -5   -0.09    0.35 
  -2 -10  -5    0.48    0.48 
  -3 -10  -5    5.15    0.94 
  -4 -10  -5    0.64    0.63 
  -5 -10  -5    0.13    0.66 
  -6 -10  -5    0.22    0.77 
  -8  11   5    0.05    0.54 
  -7  11   5    0.12    0.44 
  -6  11   5    0.10    0.40 
   5 -11  -5    0.41    0.39 
  -5  11   5    0.56    0.38 
   4 -11  -5    0.38    0.33 
  -4  11   5    0.66    0.35 
   3 -11  -5    0.77    0.30 
  -3  11   5    0.67    0.33 
   2 -11  -5    1.45    0.37 
  -2  11   5    1.78    0.42 
   1 -11  -5   -0.01    0.23 
  -1  11   5    0.15    0.24 
   0 -11  -5    2.01    0.49 
   0  11   5    3.30    0.58 
  -1 -11  -5    0.20    0.41 
  -2 -11  -5    1.01    0.53 
  -3 -11  -5   -0.19    0.43 
  -4 -11  -5    0.79    0.70 
  -5 -11  -5   -0.01    0.64 
  -6 -11  -5   -0.29    0.70 
  -8  12   5    0.71    0.58 
  -7  12   5    0.37    0.50 
  -6  12   5    0.64    0.51 
   5 -12  -5    0.23    0.42 
  -5  12   5    0.26    0.36 
   4 -12  -5    0.49    0.37 
  -4  12   5    0.59    0.35 
   3 -12  -5   -0.02    0.24 
  -3  12   5    0.07    0.25 
   2 -12  -5    1.52    0.42 
  -2  12   5    1.03    0.37 
   1 -12  -5    3.83    0.61 
  -1  12   5    4.60    0.69 
   0 -12  -5    0.37    0.37 
   0  12   5    1.49    0.44 
  -1 -12  -5   -0.24    0.36 
  -2 -12  -5   -0.33    0.38 
  -3 -12  -5   -0.23    0.44 
  -4 -12  -5    0.64    0.56 
  -5 -12  -5   -0.10    0.67 
  -6 -12  -5   -0.05    0.72 
  -8  13   5    0.25    0.56 
  -7  13   5   -0.05    0.47 
  -6  13   5   -0.04    0.42 
  -5  13   5    0.59    0.44 
   4 -13  -5    0.46    0.40 
  -4  13   5    0.19    0.36 
   3 -13  -5    0.29    0.32 
  -3  13   5    0.19    0.31 
   2 -13  -5    3.39    0.58 
  -2  13   5    2.34    0.56 
   1 -13  -5    3.36    0.60 
  -1  13   5    2.26    0.52 
   0 -13  -5    3.01    0.63 
   0  13   5    2.84    0.62 
  -1 -13  -5    0.62    0.44 
  -2 -13  -5    1.27    0.53 
  -3 -13  -5    0.24    0.49 
  -4 -13  -5    0.48    0.58 
  -5 -13  -5   -0.60    0.68 
  -8  14   5    0.08    0.55 
  -7  14   5   -0.05    0.51 
  -6  14   5    0.81    0.53 
  -5  14   5    0.63    0.46 
   4 -14  -5    0.78    0.49 
  -4  14   5    0.77    0.42 
   3 -14  -5    0.45    0.38 
  -3  14   5    0.36    0.32 
   2 -14  -5    0.59    0.38 
  -2  14   5    1.44    0.43 
   1 -14  -5    4.81    0.73 
  -1  14   5    5.82    0.82 
   0 -14  -5    2.16    0.54 
   0  14   5    2.08    0.58 
  -1 -14  -5    0.77    0.48 
  -2 -14  -5   -0.26    0.40 
  -3 -14  -5    1.43    0.68 
  -4 -14  -5    1.34    0.70 
  -5 -14  -5   -0.16    0.61 
  -7  15   5    0.25    0.55 
  -6  15   5   -0.04    0.45 
  -5  15   5   -0.29    0.39 
  -4  15   5    2.92    0.63 
   3 -15  -5    0.47    0.41 
  -3  15   5    0.39    0.35 
   2 -15  -5    4.82    0.73 
  -2  15   5    3.39    0.66 
   1 -15  -5    0.39    0.33 
  -1  15   5    0.01    0.33 
   0 -15  -5    0.23    0.32 
   0  15   5    0.05    0.36 
  -1 -15  -5    0.18    0.42 
  -2 -15  -5    0.02    0.47 
  -3 -15  -5    0.08    0.55 
  -4 -15  -5   -0.13    0.64 
  -7  16   5    0.07    0.48 
  -6  16   5    0.21    0.48 
  -5  16   5    0.86    0.54 
  -4  16   5    0.77    0.47 
  -3  16   5    2.70    0.63 
   2 -16  -5    1.62    0.47 
  -2  16   5    0.78    0.45 
   1 -16  -5    0.31    0.33 
  -1  16   5   -0.08    0.34 
   0 -16  -5    0.78    0.46 
   0  16   5    0.70    0.47 
  -1 -16  -5    0.29    0.46 
  -2 -16  -5    0.58    0.64 
  -3 -16  -5    0.27    0.57 
  -4 -16  -5    0.72    0.74 
  -6  17   5   -0.69    0.45 
  -5  17   5    0.48    0.50 
  -4  17   5    1.19    0.57 
  -3  17   5   -0.12    0.37 
   2 -17  -5    1.17    0.49 
  -2  17   5    0.08    0.38 
   1 -17  -5    0.16    0.35 
  -1  17   5    0.21    0.38 
   0 -17  -5    0.21    0.41 
   0  17   5    0.14    0.46 
  -1 -17  -5   -0.23    0.43 
  -2 -17  -5    0.15    0.58 
  -3 -17  -5    0.97    0.66 
  -6  18   5    0.53    0.58 
  -5  18   5    0.13    0.53 
  -4  18   5    0.10    0.46 
  -3  18   5    0.54    0.47 
  -2  18   5    0.55    0.48 
   1 -18  -5    0.34    0.41 
  -1  18   5    0.05    0.46 
   0 -18  -5    0.41    0.48 
  -1 -18  -5    1.26    0.62 
  -2 -18  -5    0.49    0.71 
  -5  19   5    0.42    0.61 
  -4  19   5    0.98    0.58 
  -3  19   5    0.13    0.46 
  -2  19   5    0.40    0.51 
   1 -19  -5    0.33    0.54 
  -1  19   5   -0.59    0.47 
   0 -19  -5    0.37    0.49 
  -1 -19  -5    0.11    0.55 
  -3  20   5   -0.72    0.48 
  -2  20   5   -0.06    0.55 
  -1  20   5    0.16    0.63 
   1  20  -6    0.43    0.68 
   0  20  -6   -0.95    0.63 
  -1  20  -6    1.19    0.73 
  -2  20  -6   -0.25    0.70 
  -3  20  -6    0.47    0.71 
   2  19  -6   -0.35    0.67 
   1  19  -6    0.15    0.68 
   0  19  -6    0.14    0.64 
  -1  19  -6    0.71    0.63 
  -2  19  -6    0.74    0.68 
  -3  19  -6    0.51    0.64 
  -4  19  -6   -0.06    0.51 
  -4  19  -6    0.55    0.65 
   3  18  -6   -0.33    0.58 
  -3 -18   6   -0.30    0.78 
   2  18  -6   -0.54    0.53 
   1  18  -6    0.43    0.64 
   0  18  -6    0.03    0.53 
  -1  18  -6    0.19    0.53 
  -2  18  -6    1.33    0.61 
  -3  18  -6    0.07    0.54 
  -3  18  -6   -0.04    0.40 
  -4  18  -6    0.14    0.47 
  -4  18  -6    0.34    0.60 
  -5  18  -6   -0.17    0.51 
   4  17  -6    0.16    0.69 
  -4 -17   6    0.45    0.73 
   3  17  -6    0.46    0.63 
  -3 -17   6    0.91    0.68 
   2  17  -6   -0.08    0.52 
   1  17  -6   -0.49    0.42 
   0  17  -6   -0.49    0.45 
  -1  17  -6    1.02    0.56 
  -2  17  -6    0.97    0.54 
  -2  17  -6    0.26    0.44 
  -3  17  -6   -0.10    0.45 
  -3  17  -6    0.54    0.43 
  -4  17  -6    0.47    0.49 
  -4  17  -6    1.14    0.50 
  -5  17  -6   -0.24    0.41 
  -5  17  -6    0.10    0.57 
  -6  17  -6   -0.05    0.49 
   4  16  -6    1.16    0.74 
  -4 -16   6    0.47    0.64 
   3  16  -6   -0.21    0.55 
  -3 -16   6   -0.43    0.50 
   2  16  -6   -0.18    0.46 
  -2 -16   6   -0.12    0.47 
   1  16  -6    0.40    0.49 
   0  16  -6    1.51    0.58 
  -1  16  -6    0.18    0.45 
  -2  16  -6   -0.44    0.36 
  -2  16  -6   -0.03    0.35 
  -3  16  -6   -0.13    0.44 
  -3  16  -6    0.13    0.36 
  -4  16  -6    0.34    0.40 
  -4  16  -6    0.19    0.46 
  -5  16  -6   -0.29    0.38 
  -5  16  -6   -0.09    0.45 
  -6  16  -6   -0.15    0.52 
  -6  16  -6    0.21    0.50 
  -5 -15   6    1.20    0.75 
   4  15  -6    0.53    0.69 
  -4 -15   6    1.45    0.64 
   3  15  -6   -0.13    0.48 
  -3 -15   6   -0.24    0.43 
   2  15  -6    0.61    0.52 
  -2 -15   6    0.79    0.48 
   1  15  -6    0.33    0.44 
  -1 -15   6   -0.11    0.43 
   0  15  -6   -0.41    0.31 
  -1  15  -6    0.06    0.35 
  -1  15  -6    0.47    0.35 
  -2  15  -6    0.12    0.37 
  -2  15  -6   -0.47    0.34 
  -3  15  -6    0.04    0.33 
  -3  15  -6   -0.19    0.36 
  -4  15  -6   -0.40    0.41 
  -4  15  -6    0.15    0.37 
  -5  15  -6    1.08    0.54 
  -5  15  -6    0.86    0.45 
  -6  15  -6    2.12    0.63 
  -6  15  -6    0.58    0.47 
  -7  15  -6   -0.14    0.49 
  -7  15  -6    0.06    0.56 
  -5 -14   6    0.02    0.52 
   4  14  -6   -0.52    0.56 
  -4 -14   6   -0.30    0.42 
   3  14  -6   -0.48    0.45 
  -3 -14   6    0.30    0.45 
   2  14  -6   -0.16    0.38 
  -2 -14   6    0.10    0.39 
   1  14  -6    0.03    0.30 
  -1 -14   6   -0.12    0.34 
   0  14  -6   10.14    1.12 
  -1  14  -6    0.88    0.36 
  -1  14  -6    1.09    0.46 
  -2  14  -6    0.06    0.30 
  -2  14  -6    0.17    0.34 
  -3  14  -6    0.03    0.37 
  -3  14  -6   -0.10    0.31 
  -4  14  -6    2.51    0.56 
  -4  14  -6    2.83    0.64 
  -5  14  -6    8.60    1.06 
  -5  14  -6    8.31    1.01 
  -6  14  -6    0.95    0.53 
  -6  14  -6    0.28    0.47 
  -7  14  -6    0.56    0.55 
  -7  14  -6    0.63    0.55 
  -6 -13   6    0.32    0.61 
  -5 -13   6   -0.28    0.44 
   4  13  -6   -0.26    0.43 
  -4 -13   6    0.61    0.46 
   3  13  -6    0.39    0.45 
  -3 -13   6    0.49    0.42 
   2  13  -6    0.11    0.37 
  -2 -13   6    0.26    0.37 
   1  13  -6    0.35    0.38 
  -1 -13   6    0.64    0.37 
   0  13  -6   -0.05    0.22 
   0  13  -6   -0.35    0.29 
   0 -13   6    0.41    0.30 
  -1  13  -6   -0.31    0.19 
  -1  13  -6    0.37    0.33 
  -2  13  -6    0.12    0.34 
  -2  13  -6    0.35    0.32 
  -3  13  -6    0.09    0.31 
  -3  13  -6   -0.49    0.33 
  -4  13  -6   -0.12    0.27 
  -4  13  -6   -0.06    0.35 
  -5  13  -6    0.91    0.45 
  -6  13  -6   -0.12    0.39 
  -7  13  -6    0.42    0.49 
  -6 -12   6    0.45    0.56 
  -5 -12   6   -0.18    0.38 
   4  12  -6    0.35    0.52 
  -4 -12   6    0.05    0.34 
   3  12  -6    1.01    0.54 
  -3 -12   6    1.80    0.50 
   2  12  -6    3.21    0.70 
  -2 -12   6    3.74    0.61 
   1  12  -6    1.34    0.46 
  -1 -12   6    2.82    0.49 
   0  12  -6    0.28    0.35 
   0  12  -6    1.42    0.30 
   0 -12   6    1.39    0.36 
  -1  12  -6    0.83    0.30 
  -1  12  -6    0.92    0.37 
  -2  12  -6    1.82    0.43 
  -2  12  -6    1.60    0.46 
  -3  12  -6   12.83    1.07 
  -3  12  -6   10.56    1.06 
  -4  12  -6    4.81    0.74 
  -5  12  -6   16.46    1.34 
  -6  12  -6    0.57    0.42 
  -7  12  -6   -0.09    0.46 
  -8  12  -6    1.01    0.63 
  -7 -11   6    0.19    0.62 
  -6 -11   6    0.51    0.45 
  -5 -11   6   -0.16    0.37 
   4  11  -6    0.50    0.46 
  -4 -11   6    0.65    0.37 
   3  11  -6    1.14    0.52 
  -3 -11   6    1.58    0.43 
   2  11  -6   -0.05    0.30 
  -2 -11   6    0.46    0.32 
   1  11  -6    0.52    0.33 
  -1 -11   6    0.78    0.30 
   0  11  -6    3.05    0.40 
   0  11  -6    1.66    0.44 
   0 -11   6    2.72    0.43 
  -1  11  -6    0.80    0.32 
  -1  11  -6    1.03    0.31 
   1 -11   6    0.99    0.27 
  -2  11  -6    4.09    0.64 
  -2  11  -6    3.80    0.56 
  -3  11  -6    9.90    0.96 
  -4  11  -6    7.43    0.87 
  -5  11  -6    3.22    0.60 
  -6  11  -6    0.41    0.42 
  -7  11  -6    0.15    0.47 
  -8  11  -6   -0.16    0.51 
  -7 -10   6    1.64    0.67 
  -6 -10   6    1.24    0.52 
  -5 -10   6    0.71    0.39 
   4  10  -6    1.18    0.50 
  -4 -10   6    1.51    0.47 
   3  10  -6    1.18    0.46 
  -3 -10   6    1.62    0.47 
   2  10  -6    2.49    0.57 
  -2 -10   6    2.44    0.51 
   1  10  -6    4.01    0.39 
   1  10  -6    3.84    0.62 
  -1 -10   6    3.72    0.54 
   0  10  -6    0.89    0.24 
   0  10  -6    0.68    0.33 
   0 -10   6    0.84    0.26 
  -1  10  -6   16.42    1.06 
  -1  10  -6   11.78    1.05 
   1 -10   6   14.71    0.94 
  -2  10  -6    1.48    0.39 
  -3  10  -6   -0.18    0.25 
  -4  10  -6    1.15    0.37 
  -5  10  -6    2.52    0.56 
  -6  10  -6   -0.14    0.33 
  -7  10  -6    0.66    0.50 
  -8  10  -6   -0.11    0.49 
  -7  -9   6   -0.02    0.53 
  -6  -9   6    0.39    0.44 
  -5  -9   6    2.34    0.60 
   4   9  -6    3.00    0.69 
  -4  -9   6    3.68    0.68 
   3   9  -6    0.00    0.30 
  -3  -9   6   -0.01    0.25 
   2   9  -6    0.16    0.28 
  -2  -9   6   -0.24    0.18 
   1   9  -6    0.17    0.23 
   1   9  -6    0.65    0.17 
  -1  -9   6    0.64    0.26 
   0   9  -6    9.44    0.86 
   0   9  -6    9.04    0.68 
   0  -9   6    9.70    0.75 
  -1   9  -6    8.94    0.80 
   1  -9   6    7.73    0.58 
  -2   9  -6    0.10    0.18 
  -3   9  -6    0.04    0.27 
  -4   9  -6    0.52    0.30 
  -5   9  -6    0.54    0.35 
  -6   9  -6    0.88    0.44 
  -7   9  -6    0.46    0.48 
  -8   9  -6   -0.49    0.50 
  -8  -8   6    0.03    0.60 
  -7  -8   6    1.57    0.68 
  -6  -8   6    0.72    0.43 
  -5  -8   6   -0.22    0.26 
   4   8  -6    0.90    0.47 
  -4  -8   6    1.79    0.45 
   3   8  -6    3.83    0.68 
  -3  -8   6    5.45    0.71 
   2   8  -6    2.66    0.49 
  -2  -8   6    2.52    0.45 
   1   8  -6    0.17    0.21 
   1   8  -6    0.32    0.14 
  -1  -8   6    0.45    0.22 
   0   8  -6    0.26    0.15 
   0   8  -6    0.13    0.19 
   0  -8   6    0.04    0.16 
  -1   8  -6    1.88    0.37 
   1  -8   6    2.53    0.29 
  -2   8  -6    2.74    0.45 
  -3   8  -6    0.35    0.24 
  -4   8  -6    1.06    0.37 
  -5   8  -6    2.77    0.57 
  -6   8  -6    0.53    0.41 
  -7   8  -6    0.30    0.44 
  -8   8  -6   -0.35    0.49 
  -8  -7   6    0.32    0.64 
  -7  -7   6   -0.34    0.53 
  -6  -7   6    1.27    0.56 
  -5  -7   6    1.52    0.46 
   4   7  -6    4.63    0.79 
  -4  -7   6    4.51    0.70 
   3   7  -6   -0.10    0.25 
   3   7  -6    0.13    0.30 
   2   7  -6    0.52    0.26 
   2   7  -6    0.91    0.32 
   1   7  -6    8.60    0.74 
   1   7  -6    8.78    0.56 
   1   7  -6    9.29    0.86 
   0   7  -6    3.09    0.43 
   0   7  -6    2.94    0.43 
  -1   7  -6   35.03    2.00 
  -1   7  -6   32.86    2.06 
  -2   7  -6   -0.04    0.16 
  -3   7  -6    2.85    0.47 
  -4   7  -6    4.35    0.63 
  -5   7  -6    0.33    0.33 
  -6   7  -6    1.89    0.50 
  -7   7  -6   -0.05    0.35 
  -8   7  -6    0.55    0.55 
  -8  -6   6    0.01    0.62 
  -7  -6   6    4.66    0.94 
  -6  -6   6    0.16    0.43 
  -5  -6   6   -0.29    0.22 
   4   6  -6    2.41    0.58 
   4   6  -6    2.52    0.64 
   3   6  -6    9.02    1.02 
   3   6  -6    9.86    0.99 
   2   6  -6    0.66    0.28 
   2   6  -6    0.49    0.26 
   1   6  -6    0.05    0.09 
   1   6  -6   -0.08    0.18 
   1   6  -6    0.11    0.16 
   0   6  -6    0.87    0.25 
   0   6  -6    0.66    0.21 
  -1   6  -6   15.90    1.13 
  -1   6  -6   17.64    1.07 
  -2   6  -6    7.29    0.68 
  -3   6  -6    9.99    0.83 
  -4   6  -6    0.17    0.28 
  -5   6  -6   -0.03    0.29 
  -6   6  -6    2.22    0.55 
  -7   6  -6    0.34    0.45 
  -8   6  -6    0.01    0.52 
  -8  -5   6    3.20    0.86 
  -7  -5   6    0.04    0.46 
  -6  -5   6    1.19    0.52 
   5   5  -6    0.46    0.41 
   4   5  -6    0.12    0.32 
   4   5  -6    0.27    0.34 
   3   5  -6    7.86    0.94 
   3   5  -6    9.44    0.93 
   2   5  -6    2.47    0.48 
   2   5  -6    1.94    0.39 
   1   5  -6   60.68    3.55 
   1   5  -6   60.11    3.44 
   0   5  -6    1.45    0.27 
   0   5  -6    0.96    0.24 
  -1   5  -6    3.52    0.33 
  -1   5  -6    2.62    0.39 
  -2   5  -6    0.11    0.10 
  -2   5  -6    0.18    0.19 
  -3   5  -6   39.34    2.29 
  -3   5  -6   36.01    2.08 
  -4   5  -6    0.10    0.25 
  -5   5  -6    2.68    0.55 
  -6   5  -6    0.15    0.35 
  -7   5  -6    0.39    0.45 
  -8   5  -6    0.42    0.53 
  -8  -4   6    0.39    0.61 
  -7  -4   6    0.02    0.44 
   6   4  -6    0.49    0.43 
   5   4  -6    0.78    0.49 
   4   4  -6   11.76    1.13 
   4   4  -6   10.97    1.20 
   3   4  -6   20.95    1.57 
   3   4  -6   21.05    1.48 
   2   4  -6   28.88    1.82 
   2   4  -6   29.27    1.93 
   1   4  -6   15.80    1.08 
   1   4  -6   17.41    1.17 
   0   4  -6   70.81    3.77 
   0   4  -6   64.68    3.84 
  -1   4  -6    9.23    0.62 
  -1   4  -6    8.13    0.66 
  -2   4  -6   20.26    1.30 
  -2   4  -6   19.22    1.17 
  -3   4  -6    6.39    0.64 
  -3   4  -6    5.92    0.45 
  -4   4  -6    1.12    0.27 
  -4   4  -6    0.78    0.33 
  -5   4  -6    1.05    0.40 
  -6   4  -6    3.37    0.66 
  -7   4  -6    0.37    0.45 
  -8   4  -6   -0.27    0.50 
  -9  -3   6    0.82    0.67 
  -8  -3   6   -0.40    0.49 
  -7  -3   6    0.30    0.42 
   6   3  -6    0.00    0.37 
   5   3  -6    5.43    0.91 
   4   3  -6    3.07    0.56 
   4   3  -6    2.06    0.52 
  -4  -3   6    3.35    0.28 
   3   3  -6   10.47    1.04 
   3   3  -6   10.90    0.90 
   2   3  -6    2.19    0.41 
   2   3  -6    1.64    0.33 
   1   3  -6   17.71    1.15 
   1   3  -6   18.55    1.25 
   0   3  -6   14.31    1.02 
   0   3  -6   16.45    0.99 
  -1   3  -6   68.84    3.70 
  -1   3  -6   62.32    3.66 
  -2   3  -6   30.25    1.79 
  -2   3  -6   31.43    1.88 
  -3   3  -6   60.50    3.59 
  -3   3  -6   64.45    3.54 
  -4   3  -6    0.60    0.30 
  -4   3  -6    1.25    0.31 
  -5   3  -6    2.33    0.53 
  -5   3  -6    2.74    0.47 
  -6   3  -6    1.60    0.53 
  -7   3  -6    0.39    0.48 
  -8   3  -6    4.39    0.93 
  -9  -2   6    0.37    0.65 
  -8  -2   6   -0.15    0.51 
   7   2  -6    0.54    0.45 
   6   2  -6   -0.04    0.39 
   5   2  -6   -0.27    0.31 
   4   2  -6    1.34    0.41 
  -4  -2   6    1.00    0.19 
   3   2  -6   12.82    1.07 
   3   2  -6   12.64    0.98 
  -3  -2   6   12.86    0.77 
   2   2  -6    4.05    0.45 
   2   2  -6    3.78    0.55 
   1   2  -6   75.50    4.27 
   1   2  -6   80.75    4.46 
   0   2  -6  116.92    6.68 
   0   2  -6  123.51    6.49 
  -1   2  -6    5.81    0.47 
  -1   2  -6    5.81    0.49 
  -2   2  -6   36.80    2.22 
  -2   2  -6   38.51    2.19 
  -3   2  -6    0.11    0.19 
  -3   2  -6   -0.13    0.15 
  -4   2  -6    0.46    0.31 
  -4   2  -6    1.29    0.36 
  -5   2  -6   -0.32    0.25 
  -5   2  -6   -0.07    0.31 
  -6   2  -6    0.14    0.36 
  -7   2  -6    8.29    1.15 
  -8   2  -6    0.38    0.60 
  -9  -1   6    0.26    0.62 
  -8  -1   6    0.40    0.48 
   7   1  -6    0.27    0.46 
   6   1  -6    2.78    0.68 
   5   1  -6    4.27    0.78 
  -5  -1   6    5.34    0.49 
   4   1  -6   14.63    1.24 
  -4  -1   6   14.51    0.92 
   3   1  -6    0.03    0.16 
   3   1  -6   -0.05    0.17 
  -3  -1   6   -0.03    0.10 
   2   1  -6   19.04    1.21 
   2   1  -6   21.19    1.37 
  -2  -1   6   18.37    1.11 
   1   1  -6   43.35    2.50 
   1   1  -6   39.70    2.31 
   0   1  -6    5.06    0.50 
   0   1  -6    5.51    0.42 
  -1   1  -6    2.32    0.32 
  -1   1  -6    2.57    0.31 
  -2   1  -6    2.46    0.37 
  -2   1  -6    2.74    0.35 
  -3   1  -6    1.28    0.31 
  -3   1  -6    1.69    0.34 
  -4   1  -6    0.36    0.26 
  -4   1  -6    0.52    0.31 
  -5   1  -6    3.70    0.62 
  -5   1  -6    3.90    0.60 
  -6   1  -6   13.09    1.21 
  -6   1  -6   15.01    1.36 
  -7   1  -6    0.60    0.47 
  -8   1  -6    1.48    0.71 
  -9   0   6    0.42    0.61 
   8   0  -6    0.68    0.62 
   7   0  -6    0.47    0.48 
   6   0  -6    0.34    0.39 
   5   0  -6    2.24    0.58 
  -5   0   6    2.22    0.34 
   4   0  -6    2.35    0.52 
  -4   0   6    3.16    0.35 
   3   0  -6    0.29    0.18 
   3   0  -6    0.96    0.32 
  -3   0   6    1.63    0.22 
   2   0  -6   -0.01    0.15 
   2   0  -6    0.06    0.10 
  -2   0   6   -0.18    0.09 
   1   0  -6   30.64    1.91 
   0   0  -6   53.45    2.80 
   0   0  -6   47.28    2.92 
  -1   0  -6   13.42    0.89 
  -1   0  -6   12.61    0.86 
  -2   0  -6    3.16    0.40 
  -2   0  -6    2.41    0.37 
  -3   0  -6    2.11    0.41 
  -3   0  -6    2.33    0.40 
  -4   0  -6    4.56    0.61 
  -4   0  -6    4.87    0.64 
  -5   0  -6   16.51    1.22 
  -5   0  -6   14.13    1.22 
  -6   0  -6    0.71    0.48 
  -6   0  -6    0.48    0.41 
  -7   0  -6    1.52    0.63 
  -8   0  -6    0.02    0.51 
  -9   1   6    0.89    0.64 
   8  -1  -6    0.08    0.56 
   7  -1  -6    0.13    0.45 
   6  -1  -6    2.17    0.63 
  -6   1   6    2.42    0.41 
   5  -1  -6    2.26    0.57 
  -5   1   6    3.21    0.41 
   4  -1  -6    1.02    0.34 
  -4   1   6    1.16    0.26 
   3  -1  -6    8.36    0.88 
  -3   1   6    9.91    0.67 
   2  -1  -6    0.07    0.15 
   2  -1  -6    0.12    0.12 
  -2   1   6    0.29    0.15 
   1  -1  -6    2.86    0.40 
   1  -1  -6    2.41    0.25 
   0  -1  -6    7.23    0.58 
  -1  -1  -6   28.02    1.75 
  -1  -1  -6   29.63    1.70 
  -2  -1  -6    1.20    0.27 
  -2  -1  -6    1.25    0.32 
  -3  -1  -6    6.93    0.71 
  -3  -1  -6    8.38    0.78 
  -4  -1  -6    4.22    0.62 
  -4  -1  -6    3.89    0.61 
  -5  -1  -6    0.31    0.37 
  -5  -1  -6    0.08    0.38 
  -6  -1  -6   -0.17    0.35 
  -6  -1  -6    0.03    0.45 
  -7  -1  -6    0.51    0.49 
  -7  -1  -6    0.43    0.58 
  -8  -1  -6    0.21    0.59 
  -9   2   6   -0.23    0.53 
   8  -2  -6    0.24    0.58 
   7  -2  -6    1.55    0.63 
   6  -2  -6    0.12    0.40 
  -6   2   6    0.78    0.28 
   5  -2  -6    3.11    0.65 
  -5   2   6    3.37    0.44 
   4  -2  -6    1.71    0.46 
  -4   2   6    2.41    0.35 
   3  -2  -6    0.26    0.21 
  -3   2   6    0.07    0.14 
   2  -2  -6   -0.06    0.14 
   2  -2  -6   -0.01    0.10 
  -2   2   6    0.00    0.11 
   1  -2  -6    7.64    0.49 
   1  -2  -6    8.34    0.67 
  -1   2   6    7.62    0.60 
   0  -2  -6   90.36    4.79 
   0  -2  -6   86.92    5.00 
  -1  -2  -6    2.45    0.31 
  -1  -2  -6    2.44    0.37 
  -2  -2  -6    0.80    0.28 
  -2  -2  -6    0.53    0.21 
  -3  -2  -6    4.18    0.61 
  -4  -2  -6    0.28    0.36 
  -5  -2  -6    5.43    0.81 
  -6  -2  -6   -0.19    0.45 
  -7  -2  -6   -0.44    0.54 
  -7  -2  -6    0.10    0.43 
  -8  -2  -6    0.24    0.58 
   9  -3  -6    0.59    0.72 
   8  -3  -6    0.02    0.45 
   7  -3  -6    3.26    0.71 
  -7   3   6    2.05    0.48 
   6  -3  -6    1.70    0.57 
  -6   3   6    1.71    0.37 
   5  -3  -6    6.72    0.92 
  -5   3   6    8.03    0.72 
   4  -3  -6    0.89    0.34 
  -4   3   6    1.06    0.28 
   3  -3  -6    6.75    0.74 
  -3   3   6    6.18    0.54 
   2  -3  -6    6.13    0.64 
   2  -3  -6    5.58    0.37 
  -2   3   6    4.55    0.49 
   1  -3  -6    0.14    0.16 
   1  -3  -6    0.01    0.07 
  -1   3   6    0.00    0.14 
   0  -3  -6    4.04    0.48 
   0  -3  -6    4.51    0.35 
  -1  -3  -6    2.90    0.35 
  -1  -3  -6    3.67    0.47 
  -2  -3  -6   22.96    1.56 
  -3  -3  -6    1.25    0.43 
  -4  -3  -6    6.78    0.85 
  -5  -3  -6    0.54    0.48 
  -6  -3  -6   -0.06    0.50 
  -7  -3  -6   -0.33    0.56 
  -8  -3  -6    0.30    0.59 
   9  -4  -6    1.48    0.92 
   8  -4  -6    0.43    0.53 
   7  -4  -6    0.57    0.52 
  -7   4   6    0.90    0.39 
   6  -4  -6    8.17    1.05 
  -6   4   6    6.11    0.73 
   5  -4  -6    3.92    0.68 
  -5   4   6    6.36    0.64 
   4  -4  -6   26.19    1.82 
  -4   4   6   25.90    1.65 
   3  -4  -6    1.45    0.37 
  -3   4   6    2.29    0.37 
   2  -4  -6    3.32    0.48 
  -2   4   6    3.68    0.44 
   1  -4  -6    0.79    0.11 
   1  -4  -6    0.68    0.22 
  -1   4   6    0.96    0.26 
   0  -4  -6    4.78    0.37 
   0  -4  -6    4.87    0.53 
  -1  -4  -6   11.61    0.92 
  -2  -4  -6   -0.23    0.22 
  -3  -4  -6    9.95    1.01 
  -4  -4  -6    1.12    0.49 
  -5  -4  -6    9.57    1.11 
  -6  -4  -6   -0.30    0.51 
  -7  -4  -6    0.12    0.64 
  -8  -4  -6    1.01    0.73 
  -8  -4  -6    0.03    0.76 
   8  -5  -6    0.37    0.52 
  -8   5   6    1.38    0.51 
   7  -5  -6    1.09    0.55 
  -7   5   6    0.69    0.41 
   6  -5  -6   11.30    1.24 
  -6   5   6   12.48    1.03 
   5  -5  -6    4.46    0.72 
  -5   5   6    4.16    0.58 
   4  -5  -6    4.67    0.65 
  -4   5   6    3.54    0.33 
  -4   5   6    4.25    0.54 
   3  -5  -6    8.22    0.82 
  -3   5   6    7.87    0.72 
   2  -5  -6    3.99    0.51 
  -2   5   6    3.20    0.45 
   1  -5  -6    9.90    0.56 
   1  -5  -6    9.13    0.75 
  -1   5   6    8.95    0.75 
   0  -5  -6    0.07    0.16 
  -1  -5  -6    7.97    0.79 
  -2  -5  -6    8.72    0.90 
  -3  -5  -6   -0.43    0.31 
  -4  -5  -6    1.61    0.57 
  -5  -5  -6    1.00    0.57 
  -6  -5  -6    0.38    0.59 
  -7  -5  -6    0.50    0.70 
  -8  -5  -6    1.21    0.85 
   8  -6  -6    0.46    0.58 
  -8   6   6    0.19    0.42 
   7  -6  -6    5.10    0.91 
  -7   6   6    4.90    0.76 
   6  -6  -6    1.25    0.49 
  -6   6   6    1.40    0.45 
   5  -6  -6   22.31    1.72 
  -5   6   6   24.72    1.64 
   4  -6  -6    0.21    0.23 
  -4   6   6    0.47    0.25 
   3  -6  -6    9.44    0.91 
  -3   6   6    9.95    0.81 
   2  -6  -6    1.34    0.32 
  -2   6   6    1.43    0.32 
   1  -6  -6    8.01    0.49 
   1  -6  -6    7.62    0.68 
  -1   6   6    8.51    0.71 
   0  -6  -6   62.58    3.67 
  -1  -6  -6    4.26    0.62 
  -2  -6  -6    5.81    0.78 
  -3  -6  -6    9.11    1.06 
  -4  -6  -6    0.42    0.51 
  -5  -6  -6    0.18    0.47 
  -6  -6  -6    0.03    0.58 
  -7  -6  -6   -0.39    0.66 
  -8   7   6    0.97    0.49 
   7  -7  -6    1.61    0.64 
  -7   7   6    2.57    0.60 
   6  -7  -6    1.49    0.55 
  -6   7   6    2.48    0.53 
   5  -7  -6    7.37    0.94 
  -5   7   6    9.32    0.91 
   4  -7  -6    3.60    0.59 
  -4   7   6    3.50    0.54 
   3  -7  -6    0.02    0.16 
  -3   7   6    0.00    0.18 
   2  -7  -6    3.69    0.53 
  -2   7   6    4.98    0.58 
   1  -7  -6   19.45    1.32 
  -1   7   6   18.27    1.32 
   0  -7  -6   -0.08    0.18 
   0   7   6    0.15    0.23 
  -1  -7  -6    3.33    0.59 
  -2  -7  -6    0.35    0.41 
  -3  -7  -6   -0.02    0.43 
  -4  -7  -6    5.02    0.91 
  -5  -7  -6    0.21    0.57 
  -6  -7  -6    1.75    0.74 
  -7  -7  -6   -0.08    0.71 
  -9   8   6   -0.20    0.57 
  -8   8   6    0.26    0.49 
   7  -8  -6    3.25    0.76 
  -7   8   6    2.87    0.62 
   6  -8  -6    2.99    0.72 
  -6   8   6    3.13    0.60 
   5  -8  -6    1.62    0.50 
  -5   8   6    0.77    0.38 
   4  -8  -6    0.11    0.24 
  -4   8   6    0.76    0.32 
   3  -8  -6    5.97    0.71 
  -3   8   6    5.52    0.68 
   2  -8  -6   14.10    1.08 
  -2   8   6   14.28    1.07 
   1  -8  -6   10.03    0.86 
  -1   8   6   11.70    0.92 
   0  -8  -6    5.16    0.65 
   0   8   6    4.90    0.67 
  -1  -8  -6    6.43    0.81 
  -2  -8  -6    1.08    0.51 
  -3  -8  -6    0.12    0.50 
  -4  -8  -6    2.58    0.76 
  -5  -8  -6    0.34    0.62 
  -6  -8  -6   -0.26    0.57 
  -7  -8  -6   -0.39    0.72 
  -9   9   6   -0.01    0.60 
  -8   9   6    1.17    0.60 
  -7   9   6   -0.28    0.38 
   6  -9  -6   -0.05    0.39 
  -6   9   6   -0.22    0.32 
   5  -9  -6    0.52    0.39 
  -5   9   6    1.23    0.42 
   4  -9  -6    0.15    0.24 
  -4   9   6    0.92    0.34 
   3  -9  -6    0.87    0.31 
  -3   9   6    1.60    0.41 
   2  -9  -6    2.65    0.47 
  -2   9   6    2.56    0.48 
   1  -9  -6    1.65    0.37 
  -1   9   6    1.49    0.40 
   0  -9  -6    4.05    0.62 
   0   9   6    3.27    0.61 
  -1  -9  -6    0.01    0.31 
  -2  -9  -6    1.29    0.55 
  -3  -9  -6    2.67    0.74 
  -4  -9  -6    2.91    0.81 
  -5  -9  -6   -0.09    0.57 
  -6  -9  -6    0.31    0.74 
  -8  10   6    1.41    0.64 
  -7  10   6    0.42    0.47 
   6 -10  -6    0.85    0.51 
  -6  10   6    0.31    0.39 
   5 -10  -6    0.37    0.38 
  -5  10   6    0.55    0.39 
   4 -10  -6    0.73    0.36 
  -4  10   6    0.46    0.34 
   3 -10  -6    2.73    0.50 
  -3  10   6    2.35    0.49 
   2 -10  -6    1.30    0.34 
  -2  10   6    0.98    0.36 
   1 -10  -6    1.82    0.44 
  -1  10   6    1.86    0.46 
   0 -10  -6    1.93    0.48 
   0  10   6    1.64    0.47 
  -1 -10  -6    1.89    0.56 
  -2 -10  -6   -0.17    0.34 
  -3 -10  -6    1.31    0.64 
  -4 -10  -6   -0.22    0.60 
  -5 -10  -6    0.05    0.68 
  -6 -10  -6   -0.29    0.71 
  -8  11   6   -0.17    0.55 
  -7  11   6   -0.04    0.40 
  -6  11   6    1.19    0.48 
   5 -11  -6    0.38    0.36 
  -5  11   6    0.62    0.39 
   4 -11  -6    0.38    0.37 
  -4  11   6    0.14    0.31 
   3 -11  -6    0.66    0.33 
  -3  11   6    0.58    0.33 
   2 -11  -6    4.48    0.63 
  -2  11   6    3.21    0.60 
   1 -11  -6    0.86    0.33 
  -1  11   6    0.96    0.37 
   0 -11  -6    1.01    0.42 
   0  11   6    1.60    0.51 
  -1 -11  -6    2.01    0.58 
  -2 -11  -6    1.21    0.52 
  -3 -11  -6   -0.01    0.41 
  -4 -11  -6    0.48    0.61 
  -5 -11  -6   -0.47    0.65 
  -6 -11  -6    1.43    0.91 
  -8  12   6   -0.28    0.55 
  -7  12   6    0.41    0.49 
  -6  12   6    1.05    0.48 
   5 -12  -6    0.59    0.44 
  -5  12   6   -0.52    0.29 
   4 -12  -6   -0.04    0.32 
  -4  12   6    0.19    0.33 
   3 -12  -6    0.54    0.34 
  -3  12   6    0.27    0.35 
   2 -12  -6    1.87    0.46 
  -2  12   6    1.89    0.49 
   1 -12  -6   14.82    1.23 
  -1  12   6   15.32    1.26 
   0 -12  -6    0.52    0.35 
   0  12   6    0.30    0.37 
  -1 -12  -6    0.48    0.41 
  -2 -12  -6    0.58    0.46 
  -3 -12  -6    1.07    0.56 
  -4 -12  -6   -0.03    0.65 
  -5 -12  -6   -0.97    0.64 
  -8  13   6    0.19    0.57 
  -7  13   6   -0.20    0.45 
  -6  13   6   -0.31    0.41 
  -5  13   6    0.87    0.50 
   4 -13  -6    1.44    0.47 
  -4  13   6    1.45    0.51 
   3 -13  -6    0.93    0.41 
  -3  13   6    0.50    0.31 
   2 -13  -6    0.85    0.36 
  -2  13   6    0.49    0.35 
   1 -13  -6    0.54    0.32 
  -1  13   6   -0.19    0.26 
   0 -13  -6    5.86    0.84 
   0  13   6    5.83    0.88 
  -1 -13  -6    0.12    0.39 
  -2 -13  -6    0.44    0.49 
  -3 -13  -6    2.77    0.78 
  -4 -13  -6    1.05    0.68 
  -5 -13  -6    1.36    0.82 
  -7  14   6    0.52    0.52 
  -6  14   6   -0.06    0.41 
  -5  14   6    0.59    0.44 
   4 -14  -6    0.14    0.40 
  -4  14   6    0.22    0.38 
   3 -14  -6    0.14    0.35 
  -3  14   6    0.16    0.30 
   2 -14  -6    0.57    0.38 
  -2  14   6    0.27    0.32 
   1 -14  -6    0.46    0.37 
  -1  14   6    0.46    0.39 
   0 -14  -6    0.62    0.39 
   0  14   6    0.59    0.40 
  -1 -14  -6    1.02    0.49 
  -2 -14  -6    0.04    0.47 
  -3 -14  -6    0.46    0.52 
  -4 -14  -6    2.21    0.79 
  -7  15   6    0.30    0.57 
  -6  15   6   -0.22    0.48 
  -5  15   6    0.68    0.55 
  -4  15   6    0.42    0.38 
   3 -15  -6    1.01    0.48 
  -3  15   6    1.00    0.45 
   2 -15  -6    1.92    0.52 
  -2  15   6    1.39    0.50 
   1 -15  -6    0.11    0.32 
  -1  15   6    0.20    0.35 
   0 -15  -6    0.33    0.39 
   0  15   6    0.72    0.47 
  -1 -15  -6    0.03    0.44 
  -2 -15  -6    0.06    0.45 
  -3 -15  -6    0.48    0.61 
  -4 -15  -6    0.43    0.74 
  -7  16   6    0.62    0.54 
  -6  16   6   -0.06    0.45 
  -5  16   6    0.79    0.53 
  -4  16   6   -0.03    0.35 
   3 -16  -6    0.89    0.51 
  -3  16   6    1.16    0.50 
   2 -16  -6    0.56    0.40 
  -2  16   6    0.03    0.35 
   1 -16  -6    0.57    0.38 
  -1  16   6    0.03    0.35 
   0 -16  -6    0.10    0.36 
  -1 -16  -6    0.34    0.44 
  -2 -16  -6   -0.01    0.51 
  -3 -16  -6    0.72    0.66 
  -6  17   6   -0.19    0.49 
  -5  17   6   -0.29    0.48 
  -4  17   6    1.03    0.50 
  -3  17   6   -0.35    0.36 
   2 -17  -6    0.45    0.39 
  -2  17   6    0.08    0.42 
   1 -17  -6    0.77    0.45 
  -1  17   6    0.25    0.48 
   0 -17  -6   -0.03    0.38 
  -1 -17  -6    0.67    0.53 
  -2 -17  -6    0.47    0.62 
  -3 -17  -6    1.18    0.75 
  -5  18   6    0.13    0.59 
  -4  18   6    0.12    0.54 
  -3  18   6    0.07    0.45 
   2 -18  -6    0.38    0.51 
  -2  18   6    0.48    0.49 
   1 -18  -6    0.31    0.38 
  -1  18   6    0.14    0.48 
   0 -18  -6   -0.23    0.42 
  -1 -18  -6    0.92    0.59 
  -2 -18  -6    0.27    0.70 
  -4  19   6    0.72    0.66 
  -3  19   6   -0.02    0.52 
  -2  19   6    0.39    0.52 
   1 -19  -6   -0.11    0.47 
  -1  19   6   -0.08    0.51 
   0 -19  -6    0.35    0.50 
  -2  20   6    1.33    0.75 
   0  20  -7   -0.14    0.66 
  -1  20  -7   -0.33    0.61 
  -2  20  -7    0.32    0.69 
  -3  20  -7   -0.05    0.72 
   2  19  -7    0.71    0.72 
   1  19  -7    0.09    0.62 
   0  19  -7   -0.27    0.64 
  -1  19  -7    0.59    0.62 
  -2  19  -7    0.34    0.64 
  -3  19  -7    0.32    0.70 
  -4  19  -7    0.16    0.62 
  -4  19  -7    0.24    0.59 
   3  18  -7   -0.05    0.66 
   2  18  -7    0.88    0.69 
   1  18  -7   -0.23    0.56 
   0  18  -7    0.46    0.59 
  -1  18  -7    1.38    0.65 
  -2  18  -7    0.11    0.57 
  -3  18  -7   -0.30    0.48 
  -3  18  -7    0.81    0.62 
  -4  18  -7    1.36    0.58 
  -4  18  -7   -0.39    0.53 
  -5  18  -7    0.02    0.51 
  -5  18  -7    0.13    0.60 
   3  17  -7    0.52    0.68 
  -3 -17   7   -0.25    0.62 
   2  17  -7   -0.20    0.55 
   1  17  -7    0.32    0.58 
   0  17  -7    0.25    0.50 
  -1  17  -7    0.08    0.50 
  -2  17  -7    1.08    0.60 
  -3  17  -7   -0.04    0.38 
  -3  17  -7   -0.31    0.46 
  -4  17  -7    0.12    0.39 
  -4  17  -7    0.31    0.54 
  -5  17  -7    0.22    0.55 
  -5  17  -7    0.31    0.46 
  -6  17  -7   -0.28    0.55 
  -6  17  -7   -0.02    0.56 
   4  16  -7    0.88    0.79 
  -4 -16   7    0.10    0.60 
   3  16  -7    0.30    0.60 
  -3 -16   7   -0.47    0.50 
   2  16  -7   -0.21    0.49 
  -2 -16   7   -0.18    0.49 
   1  16  -7    0.02    0.49 
   0  16  -7    0.19    0.42 
  -1  16  -7    0.69    0.49 
  -2  16  -7    0.30    0.44 
  -2  16  -7    0.10    0.43 
  -3  16  -7    0.66    0.44 
  -3  16  -7    0.36    0.46 
  -4  16  -7   -0.18    0.35 
  -4  16  -7    0.00    0.47 
  -5  16  -7    0.65    0.47 
  -5  16  -7    0.45    0.40 
  -6  16  -7    1.65    0.63 
  -6  16  -7    0.60    0.55 
  -5 -15   7   -0.20    0.63 
   4  15  -7    0.38    0.67 
  -4 -15   7    0.85    0.63 
   3  15  -7    0.08    0.56 
  -3 -15   7   -0.10    0.44 
   2  15  -7    0.27    0.49 
  -2 -15   7    0.12    0.42 
   1  15  -7   -0.15    0.35 
   0  15  -7    0.22    0.37 
  -1  15  -7    0.50    0.38 
  -2  15  -7    0.13    0.35 
  -2  15  -7   -0.54    0.32 
  -3  15  -7    0.56    0.37 
  -3  15  -7    0.10    0.39 
  -4  15  -7    0.47    0.36 
  -4  15  -7   -0.50    0.41 
  -5  15  -7    0.88    0.47 
  -5  15  -7    1.73    0.62 
  -6  15  -7    0.11    0.38 
  -6  15  -7    0.17    0.45 
  -7  15  -7    0.06    0.59 
  -5 -14   7   -0.43    0.50 
   4  14  -7    0.29    0.56 
  -4 -14   7   -0.45    0.38 
   3  14  -7    0.75    0.58 
  -3 -14   7    0.12    0.44 
   2  14  -7    1.10    0.55 
  -2 -14   7    1.03    0.48 
   1  14  -7    1.27    0.50 
  -1 -14   7    1.37    0.47 
   0  14  -7    1.94    0.52 
  -1  14  -7    0.13    0.34 
  -1  14  -7    0.23    0.29 
  -2  14  -7    1.62    0.49 
  -2  14  -7    1.57    0.46 
  -3  14  -7    0.77    0.42 
  -3  14  -7    0.83    0.52 
  -4  14  -7    1.18    0.45 
  -4  14  -7    1.36    0.51 
  -5  14  -7    3.01    0.68 
  -5  14  -7    1.64    0.59 
  -6  14  -7    0.01    0.47 
  -6  14  -7    0.33    0.45 
  -7  14  -7   -0.14    0.49 
  -6 -13   7   -0.18    0.53 
  -5 -13   7   -0.12    0.42 
   4  13  -7    0.28    0.57 
  -4 -13   7    0.55    0.43 
   3  13  -7    0.10    0.45 
  -3 -13   7    0.99    0.45 
   2  13  -7    6.02    0.95 
  -2 -13   7    6.80    0.84 
   1  13  -7    1.18    0.49 
  -1 -13   7    1.49    0.46 
   0  13  -7    0.54    0.39 
  -1  13  -7    0.04    0.23 
  -1  13  -7   -0.13    0.28 
  -2  13  -7    1.96    0.47 
  -2  13  -7    2.21    0.55 
  -3  13  -7    0.74    0.37 
  -3  13  -7    0.76    0.42 
  -4  13  -7    4.60    0.75 
  -5  13  -7    3.06    0.65 
  -6  13  -7    1.02    0.50 
  -7  13  -7    0.31    0.50 
  -6 -12   7    0.58    0.55 
  -5 -12   7    0.15    0.42 
   4  12  -7   -0.23    0.38 
  -4 -12   7    0.41    0.36 
   3  12  -7   -0.08    0.39 
  -3 -12   7    0.31    0.35 
   2  12  -7    0.75    0.44 
  -2 -12   7    1.25    0.43 
   1  12  -7    0.55    0.38 
  -1 -12   7    0.70    0.31 
   0  12  -7    0.45    0.33 
   0  12  -7    0.04    0.24 
   0 -12   7    0.42    0.28 
  -1  12  -7    1.34    0.44 
  -1  12  -7    1.87    0.41 
  -2  12  -7    1.35    0.48 
  -2  12  -7    1.01    0.38 
  -3  12  -7   14.83    1.24 
  -4  12  -7    3.46    0.67 
  -5  12  -7    5.81    0.84 
  -6  12  -7    0.08    0.38 
  -7  12  -7   -0.06    0.43 
  -7 -11   7    0.38    0.65 
  -6 -11   7    0.71    0.56 
   5  11  -7    0.40    0.50 
  -5 -11   7   -0.05    0.36 
   4  11  -7    0.68    0.47 
  -4 -11   7    0.32    0.36 
   3  11  -7    0.61    0.40 
  -3 -11   7    1.18    0.43 
   2  11  -7    0.05    0.33 
  -2 -11   7    0.10    0.31 
   1  11  -7    0.13    0.30 
  -1 -11   7    0.10    0.24 
   0  11  -7    4.62    0.69 
   0  11  -7    5.28    0.52 
   0 -11   7    4.14    0.52 
  -1  11  -7    0.07    0.27 
  -1  11  -7    0.09    0.21 
  -2  11  -7   29.26    1.99 
  -3  11  -7    0.19    0.29 
  -4  11  -7   16.54    1.33 
  -5  11  -7   -0.26    0.32 
  -6  11  -7    0.27    0.41 
  -7  11  -7    0.09    0.47 
  -8  11  -7    0.58    0.55 
  -7 -10   7    0.34    0.51 
  -6 -10   7    0.35    0.45 
   5  10  -7   -0.22    0.44 
  -5 -10   7    0.03    0.34 
   4  10  -7   -0.16    0.31 
  -4 -10   7   -0.07    0.30 
   3  10  -7    2.94    0.63 
  -3 -10   7    2.95    0.56 
   2  10  -7    0.54    0.32 
  -2 -10   7    0.79    0.36 
   1  10  -7    3.21    0.59 
  -1 -10   7    4.18    0.56 
   0  10  -7    0.80    0.34 
   0  10  -7    1.07    0.27 
   0 -10   7    1.91    0.36 
  -1  10  -7    0.48    0.30 
  -1  10  -7    0.88    0.28 
   1 -10   7    1.05    0.24 
  -2  10  -7    0.12    0.28 
  -3  10  -7    6.20    0.78 
  -4  10  -7    1.29    0.41 
  -5  10  -7    0.34    0.38 
  -6  10  -7    0.53    0.44 
  -7  10  -7    0.02    0.42 
  -8  10  -7    0.59    0.56 
  -7  -9   7    0.37    0.54 
  -6  -9   7    0.41    0.40 
   5   9  -7    0.13    0.44 
  -5  -9   7    0.27    0.32 
   4   9  -7    0.54    0.45 
  -4  -9   7   -0.28    0.26 
   3   9  -7    0.22    0.32 
  -3  -9   7   -0.22    0.25 
   2   9  -7    3.39    0.60 
  -2  -9   7    4.14    0.60 
   1   9  -7    2.53    0.52 
   1   9  -7    3.06    0.32 
  -1  -9   7    4.24    0.54 
   0   9  -7    1.88    0.31 
   0   9  -7    1.42    0.37 
   0  -9   7    1.57    0.33 
  -1   9  -7    0.23    0.23 
   1  -9   7    0.14    0.17 
  -2   9  -7    1.69    0.40 
  -3   9  -7    2.92    0.52 
  -4   9  -7    0.18    0.30 
  -5   9  -7   -0.06    0.29 
  -6   9  -7    0.25    0.39 
  -7   9  -7    0.98    0.55 
  -8   9  -7    0.61    0.57 
  -7  -8   7    0.58    0.64 
  -6  -8   7   -0.02    0.37 
  -5  -8   7    0.97    0.43 
   4   8  -7    0.20    0.43 
  -4  -8   7    0.54    0.36 
   3   8  -7    4.05    0.76 
   3   8  -7    3.74    0.66 
   2   8  -7   -0.05    0.24 
   2   8  -7    0.28    0.25 
   1   8  -7    0.96    0.18 
   1   8  -7    0.96    0.34 
   1   8  -7    1.21    0.33 
   0   8  -7   10.26    0.87 
   0   8  -7   12.22    0.91 
  -1   8  -7    7.16    0.71 
   1  -8   7    6.75    0.53 
  -2   8  -7    4.37    0.59 
  -3   8  -7   -0.22    0.22 
  -4   8  -7    1.08    0.40 
  -5   8  -7    0.25    0.34 
  -6   8  -7    0.54    0.44 
  -7   8  -7    0.78    0.50 
  -8   8  -7    0.30    0.54 
  -8  -7   7    0.41    0.60 
  -7  -7   7    0.29    0.54 
  -6  -7   7    1.37    0.56 
  -5  -7   7    0.01    0.27 
   4   7  -7   -0.07    0.36 
   4   7  -7   -0.22    0.33 
   3   7  -7    6.18    0.92 
   3   7  -7    7.88    0.92 
   2   7  -7    0.48    0.29 
   2   7  -7    0.32    0.24 
   1   7  -7    1.48    0.37 
   1   7  -7    1.20    0.32 
   1   7  -7    1.90    0.21 
   0   7  -7    4.07    0.52 
   0   7  -7    4.27    0.51 
  -1   7  -7   12.74    0.86 
  -1   7  -7   12.40    0.94 
  -2   7  -7    2.91    0.45 
  -3   7  -7    3.63    0.57 
  -4   7  -7    1.18    0.38 
  -5   7  -7    0.94    0.44 
  -6   7  -7    0.74    0.46 
  -7   7  -7    0.47    0.46 
  -8   7  -7    0.01    0.49 
  -8  -6   7    0.02    0.54 
  -7  -6   7    0.61    0.56 
  -6  -6   7   -0.07    0.39 
   5   6  -7    2.46    0.70 
   4   6  -7    1.65    0.56 
   4   6  -7    2.12    0.56 
   3   6  -7   -0.04    0.24 
   3   6  -7    0.39    0.28 
   2   6  -7    0.59    0.29 
   2   6  -7    0.14    0.18 
   1   6  -7    0.71    0.27 
   1   6  -7    0.27    0.12 
   1   6  -7    0.29    0.20 
   0   6  -7   33.72    2.18 
   0   6  -7   38.75    2.19 
  -1   6  -7    0.12    0.15 
  -1   6  -7    0.13    0.18 
  -2   6  -7    0.57    0.15 
  -2   6  -7    0.72    0.25 
  -3   6  -7    5.85    0.67 
  -4   6  -7    1.77    0.44 
  -5   6  -7   -0.07    0.27 
  -6   6  -7    0.61    0.40 
  -7   6  -7    0.42    0.43 
  -8   6  -7    0.05    0.55 
  -8  -5   7    2.15    0.78 
  -7  -5   7   -0.35    0.43 
   6   5  -7    0.23    0.45 
   5   5  -7   -0.10    0.38 
   4   5  -7    2.44    0.59 
   4   5  -7    1.94    0.56 
   3   5  -7   21.87    1.63 
   3   5  -7   21.16    1.54 
   2   5  -7    0.61    0.27 
   2   5  -7    0.73    0.25 
   1   5  -7   41.34    2.61 
   1   5  -7   44.04    2.53 
   0   5  -7    5.96    0.56 
   0   5  -7    5.44    0.55 
  -1   5  -7    8.85    0.65 
  -1   5  -7    9.97    0.75 
  -2   5  -7    6.05    0.45 
  -2   5  -7    5.91    0.63 
  -3   5  -7   -0.08    0.20 
  -3   5  -7    0.24    0.13 
  -4   5  -7   18.81    1.37 
  -5   5  -7    1.39    0.43 
  -6   5  -7    0.18    0.38 
  -7   5  -7    0.21    0.44 
  -8   5  -7    0.06    0.56 
  -8  -4   7    0.70    0.62 
  -7  -4   7   -0.17    0.43 
   6   4  -7    0.15    0.38 
   5   4  -7    0.39    0.37 
   4   4  -7   10.69    1.23 
   4   4  -7   13.40    1.11 
   3   4  -7    0.21    0.25 
   3   4  -7    0.61    0.28 
   2   4  -7    0.39    0.23 
   2   4  -7    0.65    0.24 
   1   4  -7   59.37    3.43 
   1   4  -7   56.80    3.29 
   0   4  -7    2.04    0.32 
   0   4  -7    2.31    0.36 
  -1   4  -7    2.43    0.31 
  -1   4  -7    1.73    0.32 
  -2   4  -7    0.16    0.17 
  -2   4  -7    0.62    0.17 
  -3   4  -7   12.38    1.03 
  -3   4  -7   15.20    0.92 
  -4   4  -7    0.49    0.22 
  -4   4  -7    0.34    0.26 
  -5   4  -7    0.71    0.37 
  -6   4  -7    1.15    0.44 
  -7   4  -7    0.05    0.44 
  -8   4  -7    1.30    0.68 
  -8  -3   7    0.15    0.56 
   7   3  -7   -0.51    0.38 
   6   3  -7   -0.11    0.33 
   5   3  -7    1.40    0.51 
   4   3  -7    0.90    0.43 
   4   3  -7    1.70    0.45 
   3   3  -7   -0.13    0.17 
   3   3  -7    0.07    0.22 
   2   3  -7    1.33    0.34 
   2   3  -7    0.77    0.26 
   1   3  -7    5.40    0.52 
   1   3  -7    5.67    0.61 
   0   3  -7  108.58    6.30 
   0   3  -7  116.87    6.13 
  -1   3  -7   29.14    1.83 
  -1   3  -7   31.89    1.84 
  -2   3  -7   19.65    1.19 
  -2   3  -7   17.69    1.25 
  -3   3  -7    0.16    0.19 
  -3   3  -7    0.07    0.15 
  -4   3  -7    0.06    0.25 
  -4   3  -7    0.40    0.25 
  -5   3  -7    0.62    0.37 
  -6   3  -7    0.16    0.38 
  -7   3  -7    0.41    0.52 
  -8   3  -7   -0.09    0.57 
  -9  -2   7    0.17    0.59 
  -8  -2   7   -0.29    0.46 
   7   2  -7    0.75    0.58 
   6   2  -7    1.15    0.56 
   5   2  -7    8.36    1.11 
   4   2  -7   13.13    1.08 
   4   2  -7   10.28    1.21 
  -4  -2   7   13.82    0.82 
   3   2  -7   24.06    1.74 
   3   2  -7   24.65    1.62 
  -3  -2   7   24.64    1.39 
   2   2  -7    0.91    0.26 
   2   2  -7    1.35    0.35 
   1   2  -7    5.41    0.61 
   1   2  -7    5.30    0.49 
   0   2  -7  264.44   13.66 
   0   2  -7  248.06   14.03 
  -1   2  -7   58.28    3.37 
  -1   2  -7   61.70    3.44 
  -2   2  -7    5.42    0.47 
  -2   2  -7    3.74    0.49 
  -3   2  -7    0.38    0.21 
  -3   2  -7    0.32    0.22 
  -4   2  -7    0.16    0.27 
  -4   2  -7   -0.27    0.22 
  -5   2  -7    6.54    0.73 
  -5   2  -7    6.82    0.86 
  -6   2  -7    8.27    1.06 
  -7   2  -7    2.03    0.68 
  -8   2  -7    1.22    0.65 
  -9  -1   7    0.00    0.61 
   8   1  -7    0.20    0.51 
   7   1  -7   -0.41    0.35 
   6   1  -7    0.26    0.40 
   5   1  -7    0.68    0.42 
   4   1  -7   -0.06    0.23 
  -4  -1   7    0.02    0.14 
   3   1  -7   14.79    1.12 
   3   1  -7   11.92    0.92 
  -3  -1   7   11.93    0.78 
   2   1  -7    7.97    0.62 
   2   1  -7    7.30    0.79 
   1   1  -7    2.42    0.42 
   1   1  -7    2.58    0.31 
   0   1  -7  397.60   20.43 
   0   1  -7  372.89   20.97 
  -1   1  -7   19.03    1.25 
  -1   1  -7   20.17    1.25 
  -2   1  -7   32.13    1.89 
  -2   1  -7   30.07    1.89 
  -3   1  -7    0.43    0.25 
  -3   1  -7    0.02    0.20 
  -4   1  -7    0.69    0.33 
  -4   1  -7    0.56    0.31 
  -5   1  -7    1.51    0.43 
  -5   1  -7    0.79    0.41 
  -6   1  -7    5.02    0.85 
  -7   1  -7    1.69    0.66 
  -8   1  -7    0.93    0.68 
  -9   0   7    0.07    0.58 
   8   0  -7    0.10    0.50 
   7   0  -7    1.15    0.56 
   6   0  -7    1.42    0.54 
   5   0  -7    3.26    0.70 
  -5   0   7    3.92    0.44 
   4   0  -7    2.51    0.53 
  -4   0   7    1.96    0.30 
   3   0  -7   -0.07    0.14 
   3   0  -7   -0.03    0.19 
  -3   0   7   -0.03    0.13 
   2   0  -7    3.74    0.55 
   2   0  -7    2.55    0.34 
  -2   0   7    3.20    0.34 
   1   0  -7    0.04    0.07 
   1   0  -7   -0.01    0.17 
   0   0  -7   -0.04    0.14 
   0   0  -7    0.05    0.11 
  -1   0  -7   58.54    3.29 
  -1   0  -7   55.51    3.19 
  -2   0  -7    1.35    0.30 
  -2   0  -7    1.21    0.28 
  -3   0  -7    0.10    0.21 
  -3   0  -7    0.26    0.28 
  -4   0  -7    0.69    0.37 
  -4   0  -7    0.84    0.31 
  -5   0  -7   26.15    1.84 
  -5   0  -7   24.41    1.74 
  -6   0  -7    3.55    0.72 
  -6   0  -7    4.04    0.76 
  -7   0  -7    0.15    0.53 
  -8   0  -7   -0.08    0.53 
   9  -1  -7    0.09    0.72 
   8  -1  -7    0.02    0.48 
   7  -1  -7    0.46    0.47 
   6  -1  -7   -0.41    0.33 
   5  -1  -7   -0.04    0.29 
  -5   1   7   -0.27    0.17 
   4  -1  -7    6.23    0.83 
  -4   1   7    6.19    0.53 
   3  -1  -7    0.05    0.15 
   3  -1  -7    0.77    0.30 
  -3   1   7    0.20    0.16 
   2  -1  -7    0.07    0.18 
   2  -1  -7    0.23    0.15 
  -2   1   7    0.04    0.13 
   1  -1  -7   86.43    4.72 
   1  -1  -7   78.52    4.41 
   0  -1  -7    0.17    0.15 
   0  -1  -7    0.19    0.10 
  -1  -1  -7   14.70    1.02 
  -1  -1  -7   14.85    0.97 
  -2  -1  -7    0.09    0.21 
  -2  -1  -7    0.09    0.17 
  -3  -1  -7    0.12    0.18 
  -3  -1  -7    0.53    0.29 
  -4  -1  -7   -0.06    0.27 
  -4  -1  -7   -0.45    0.30 
  -5  -1  -7   10.76    1.10 
  -5  -1  -7   10.87    1.09 
  -6  -1  -7    0.78    0.56 
  -6  -1  -7    0.59    0.43 
  -7  -1  -7    2.02    0.67 
  -8  -1  -7    0.23    0.58 
   9  -2  -7    0.28    0.70 
   8  -2  -7    0.36    0.53 
   7  -2  -7   -0.20    0.35 
   6  -2  -7    0.65    0.47 
  -6   2   7    0.67    0.28 
   5  -2  -7    0.37    0.35 
  -5   2   7    0.03    0.18 
   4  -2  -7   -0.18    0.16 
  -4   2   7   -0.19    0.16 
   3  -2  -7    0.05    0.21 
  -3   2   7    0.18    0.17 
   2  -2  -7    1.20    0.20 
   2  -2  -7    1.03    0.30 
  -2   2   7    1.00    0.24 
   1  -2  -7    2.11    0.22 
   1  -2  -7    2.73    0.42 
   0  -2  -7    2.84    0.41 
   0  -2  -7    3.51    0.33 
  -1  -2  -7    0.28    0.20 
  -1  -2  -7   -0.09    0.11 
  -2  -2  -7   12.02    0.88 
  -2  -2  -7   11.79    0.94 
  -3  -2  -7    7.92    0.80 
  -3  -2  -7    6.73    0.72 
  -4  -2  -7    8.41    0.90 
  -4  -2  -7    8.10    0.90 
  -5  -2  -7    1.02    0.51 
  -5  -2  -7    0.94    0.47 
  -6  -2  -7    1.21    0.58 
  -6  -2  -7    0.73    0.48 
  -7  -2  -7    1.05    0.68 
  -7  -2  -7    0.19    0.48 
  -8  -2  -7    0.04    0.59 
   9  -3  -7    0.28    0.64 
   8  -3  -7   -0.40    0.48 
   7  -3  -7    5.06    0.93 
   6  -3  -7   -0.58    0.36 
  -6   3   7    0.16    0.23 
   5  -3  -7    5.62    0.85 
  -5   3   7    6.48    0.65 
   4  -3  -7    0.93    0.34 
  -4   3   7    0.98    0.27 
   3  -3  -7    6.28    0.79 
  -3   3   7    8.12    0.64 
   2  -3  -7   11.25    0.89 
   2  -3  -7   10.91    0.65 
  -2   3   7    9.58    0.77 
   1  -3  -7    0.72    0.25 
   1  -3  -7    0.45    0.12 
  -1   3   7    0.77    0.25 
   0  -3  -7    7.24    0.67 
   0  -3  -7    8.68    0.57 
  -1  -3  -7    8.70    0.72 
  -1  -3  -7    7.54    0.60 
  -2  -3  -7    0.74    0.25 
  -2  -3  -7    0.78    0.33 
  -3  -3  -7    4.21    0.66 
  -4  -3  -7    8.90    1.01 
  -5  -3  -7    4.87    0.83 
  -6  -3  -7   -0.05    0.41 
  -6  -3  -7   -0.04    0.50 
  -7  -3  -7    1.17    0.64 
  -7  -3  -7    1.12    0.71 
  -8  -3  -7    0.24    0.67 
   9  -4  -7   -0.27    0.63 
   8  -4  -7    1.32    0.64 
   7  -4  -7    1.15    0.53 
  -7   4   7    0.11    0.33 
   6  -4  -7    1.44    0.55 
  -6   4   7    1.06    0.38 
   5  -4  -7    5.98    0.88 
  -5   4   7    5.97    0.65 
   4  -4  -7    3.93    0.63 
  -4   4   7    4.04    0.52 
   3  -4  -7    7.94    0.84 
  -3   4   7    7.78    0.66 
   2  -4  -7    4.02    0.56 
  -2   4   7    3.75    0.47 
   1  -4  -7    0.07    0.08 
   1  -4  -7   -0.14    0.15 
  -1   4   7    0.36    0.24 
   0  -4  -7    6.36    0.63 
   0  -4  -7    5.21    0.43 
  -1  -4  -7   21.15    1.43 
  -1  -4  -7   20.44    1.30 
  -2  -4  -7    0.26    0.28 
  -3  -4  -7    0.58    0.38 
  -4  -4  -7    0.76    0.50 
  -5  -4  -7    1.82    0.61 
  -6  -4  -7    1.12    0.63 
  -7  -4  -7    0.39    0.54 
  -7  -4  -7   -0.05    0.69 
  -8  -4  -7    0.79    0.71 
   8  -5  -7    0.02    0.49 
   7  -5  -7    2.84    0.74 
  -7   5   7    2.51    0.56 
   6  -5  -7    3.46    0.74 
  -6   5   7    4.85    0.67 
   5  -5  -7    6.26    0.87 
  -5   5   7    6.05    0.69 
   4  -5  -7    0.01    0.21 
  -4   5   7    0.57    0.24 
   3  -5  -7    5.43    0.70 
  -3   5   7    5.72    0.61 
   2  -5  -7    0.27    0.22 
  -2   5   7    0.43    0.22 
   1  -5  -7    1.49    0.16 
   1  -5  -7    1.33    0.32 
  -1   5   7    1.90    0.38 
   0  -5  -7   14.36    1.03 
   0  -5  -7   13.13    0.85 
  -1  -5  -7    3.52    0.55 
  -2  -5  -7    0.65    0.37 
  -3  -5  -7    0.73    0.50 
  -4  -5  -7    1.24    0.56 
  -5  -5  -7   -0.30    0.47 
  -6  -5  -7    0.93    0.65 
  -7  -5  -7   -0.16    0.69 
   8  -6  -7   -0.35    0.49 
   7  -6  -7    0.27    0.49 
  -7   6   7    0.46    0.44 
   6  -6  -7   -0.08    0.38 
  -6   6   7    0.07    0.31 
   5  -6  -7    0.28    0.34 
  -5   6   7   -0.04    0.25 
   4  -6  -7    0.06    0.23 
  -4   6   7    0.47    0.25 
   3  -6  -7    3.00    0.53 
  -3   6   7    4.11    0.54 
   2  -6  -7    1.21    0.32 
  -2   6   7    1.80    0.38 
   1  -6  -7    3.36    0.26 
   1  -6  -7    2.95    0.47 
  -1   6   7    3.36    0.51 
   0  -6  -7   19.50    1.36 
  -1  -6  -7    3.88    0.59 
  -2  -6  -7    0.06    0.34 
  -3  -6  -7    2.24    0.65 
  -4  -6  -7    1.31    0.56 
  -5  -6  -7    0.76    0.56 
  -6  -6  -7   -0.18    0.56 
  -7  -6  -7   -0.12    0.70 
   8  -7  -7    0.54    0.62 
  -8   7   7    0.24    0.47 
   7  -7  -7    6.30    1.03 
  -7   7   7    8.20    0.95 
   6  -7  -7    1.30    0.59 
  -6   7   7    2.13    0.50 
   5  -7  -7    2.36    0.57 
  -5   7   7    2.29    0.49 
   4  -7  -7    6.89    0.83 
  -4   7   7    5.07    0.68 
   3  -7  -7    0.64    0.29 
  -3   7   7    1.16    0.33 
   2  -7  -7   25.51    1.72 
  -2   7   7   25.08    1.68 
   1  -7  -7   10.14    0.61 
   1  -7  -7    9.59    0.84 
  -1   7   7    9.24    0.91 
   0  -7  -7    2.54    0.46 
  -1  -7  -7    1.50    0.43 
  -2  -7  -7    0.61    0.44 
  -3  -7  -7   -0.15    0.42 
  -4  -7  -7    2.50    0.70 
  -5  -7  -7    0.54    0.60 
  -6  -7  -7    0.06    0.64 
  -7  -7  -7    1.73    0.88 
  -8   8   7    0.81    0.53 
   7  -8  -7    0.81    0.55 
  -7   8   7    0.73    0.43 
   6  -8  -7   -0.02    0.38 
  -6   8   7    0.14    0.33 
   5  -8  -7    0.05    0.32 
  -5   8   7    0.12    0.30 
   4  -8  -7    0.74    0.37 
  -4   8   7    0.19    0.26 
   3  -8  -7    0.18    0.23 
  -3   8   7   -0.07    0.27 
   2  -8  -7    0.80    0.27 
  -2   8   7    0.93    0.32 
   1  -8  -7    0.06    0.19 
  -1   8   7    0.24    0.26 
   0  -8  -7    0.20    0.24 
  -1  -8  -7    2.49    0.55 
  -2  -8  -7   -0.19    0.38 
  -3  -8  -7    2.33    0.66 
  -4  -8  -7    0.23    0.55 
  -5  -8  -7   -0.25    0.61 
  -6  -8  -7    0.04    0.69 
  -7  -8  -7   -0.13    0.75 
  -8   9   7    2.74    0.74 
   7  -9  -7   -0.15    0.53 
  -7   9   7    0.78    0.50 
   6  -9  -7    0.92    0.50 
  -6   9   7    0.69    0.43 
   5  -9  -7    3.12    0.64 
  -5   9   7    3.04    0.59 
   4  -9  -7    0.97    0.41 
  -4   9   7    1.07    0.38 
   3  -9  -7    2.96    0.57 
  -3   9   7    4.00    0.60 
   2  -9  -7    3.80    0.58 
  -2   9   7    2.82    0.51 
   1  -9  -7    5.46    0.68 
  -1   9   7    3.38    0.62 
   0  -9  -7   -0.39    0.19 
  -1  -9  -7    3.15    0.63 
  -2  -9  -7    2.46    0.69 
  -3  -9  -7    0.54    0.53 
  -4  -9  -7   -0.48    0.52 
  -5  -9  -7   -0.12    0.64 
  -6  -9  -7    0.00    0.71 
  -8  10   7    0.36    0.57 
  -7  10   7    0.28    0.42 
   6 -10  -7   -0.29    0.39 
  -6  10   7    0.07    0.34 
   5 -10  -7    0.78    0.47 
  -5  10   7    0.61    0.37 
   4 -10  -7    0.57    0.36 
  -4  10   7    0.23    0.34 
   3 -10  -7    2.06    0.46 
  -3  10   7    1.40    0.42 
   2 -10  -7    2.57    0.51 
  -2  10   7    2.56    0.53 
   1 -10  -7   -0.12    0.24 
  -1  10   7    0.21    0.26 
   0 -10  -7    2.04    0.48 
  -1 -10  -7   -0.28    0.28 
  -2 -10  -7    0.41    0.43 
  -3 -10  -7    1.16    0.60 
  -4 -10  -7    1.66    0.73 
  -5 -10  -7    0.08    0.67 
  -6 -10  -7   -0.04    0.75 
  -8  11   7    0.40    0.53 
  -7  11   7    0.14    0.47 
   6 -11  -7    1.83    0.66 
  -6  11   7    2.27    0.59 
   5 -11  -7    0.93    0.47 
  -5  11   7    0.29    0.38 
   4 -11  -7   -0.19    0.29 
  -4  11   7    0.51    0.34 
   3 -11  -7    0.34    0.33 
  -3  11   7    0.23    0.31 
   2 -11  -7    3.78    0.62 
  -2  11   7    1.94    0.49 
   1 -11  -7   10.51    1.03 
  -1  11   7   10.09    1.07 
   0 -11  -7    0.18    0.32 
  -1 -11  -7   -0.17    0.34 
  -2 -11  -7    3.50    0.73 
  -3 -11  -7    1.43    0.65 
  -4 -11  -7   -0.84    0.51 
  -5 -11  -7   -0.55    0.61 
  -6 -11  -7   -0.16    0.73 
  -8  12   7    0.24    0.56 
  -7  12   7    0.14    0.47 
  -6  12   7    0.87    0.50 
   5 -12  -7    0.72    0.48 
  -5  12   7    0.70    0.42 
   4 -12  -7    0.87    0.41 
  -4  12   7    0.50    0.37 
   3 -12  -7    0.82    0.39 
  -3  12   7    0.97    0.40 
   2 -12  -7    0.62    0.34 
  -2  12   7    0.76    0.40 
   1 -12  -7    1.22    0.42 
  -1  12   7    1.32    0.45 
   0 -12  -7    4.23    0.73 
  -1 -12  -7    0.27    0.37 
  -2 -12  -7    2.54    0.68 
  -3 -12  -7    0.51    0.52 
  -4 -12  -7    0.33    0.70 
  -5 -12  -7   -0.02    0.67 
  -8  13   7    0.49    0.56 
  -7  13   7    0.17    0.50 
  -6  13   7    0.47    0.49 
   5 -13  -7    0.55    0.51 
  -5  13   7    0.56    0.42 
   4 -13  -7    0.06    0.36 
  -4  13   7   -0.24    0.35 
   3 -13  -7    0.65    0.38 
  -3  13   7    0.19    0.37 
   2 -13  -7    0.22    0.30 
  -2  13   7    0.32    0.31 
   1 -13  -7    0.00    0.31 
  -1  13   7   -0.24    0.28 
   0 -13  -7   -0.24    0.30 
  -1 -13  -7    0.20    0.40 
  -2 -13  -7    0.28    0.43 
  -3 -13  -7    1.54    0.63 
  -4 -13  -7    0.65    0.72 
  -5 -13  -7    0.51    0.75 
  -7  14   7   -0.20    0.50 
  -6  14   7   -0.01    0.45 
  -5  14   7    1.52    0.58 
   4 -14  -7    0.15    0.40 
  -4  14   7   -0.08    0.37 
   3 -14  -7    0.13    0.32 
  -3  14   7   -0.20    0.29 
   2 -14  -7    1.30    0.42 
  -2  14   7    0.85    0.48 
   1 -14  -7    0.11    0.29 
  -1  14   7    0.19    0.35 
   0 -14  -7    0.17    0.36 
  -1 -14  -7    0.33    0.46 
  -2 -14  -7    0.29    0.46 
  -3 -14  -7    0.75    0.60 
  -4 -14  -7    0.09    0.60 
  -7  15   7   -0.04    0.56 
  -6  15   7    0.05    0.48 
  -5  15   7   -0.15    0.48 
   4 -15  -7   -0.49    0.41 
  -4  15   7   -0.48    0.37 
   3 -15  -7    1.99    0.55 
  -3  15   7    0.85    0.43 
   2 -15  -7   -0.08    0.34 
  -2  15   7   -0.29    0.34 
   1 -15  -7    0.95    0.41 
  -1  15   7    1.50    0.55 
   0 -15  -7   -0.21    0.32 
  -1 -15  -7    0.41    0.46 
  -2 -15  -7   -0.33    0.48 
  -3 -15  -7    1.03    0.68 
  -4 -15  -7    0.09    0.65 
  -6  16   7    0.17    0.52 
  -5  16   7   -0.13    0.47 
  -4  16   7    0.52    0.49 
   3 -16  -7    1.20    0.49 
  -3  16   7    0.00    0.32 
   2 -16  -7    0.57    0.39 
  -2  16   7    0.60    0.46 
   1 -16  -7    0.36    0.39 
  -1  16   7    0.18    0.43 
   0 -16  -7    0.63    0.47 
  -1 -16  -7    0.86    0.53 
  -2 -16  -7    0.71    0.55 
  -3 -16  -7    0.40    0.62 
  -6  17   7   -0.04    0.51 
  -5  17   7    0.23    0.54 
  -4  17   7    0.17    0.44 
   3 -17  -7    0.97    0.57 
  -3  17   7   -0.38    0.41 
   2 -17  -7    0.15    0.38 
  -2  17   7    0.32    0.44 
   1 -17  -7   -0.17    0.36 
  -1  17   7    0.06    0.42 
   0 -17  -7    0.64    0.51 
  -1 -17  -7    0.41    0.50 
  -2 -17  -7    0.34    0.61 
  -5  18   7   -0.07    0.42 
  -4  18   7    0.69    0.56 
  -3  18   7    0.09    0.47 
   2 -18  -7    0.56    0.49 
  -2  18   7    0.60    0.49 
   1 -18  -7    0.58    0.51 
  -1  18   7   -0.76    0.40 
   0 -18  -7    0.55    0.53 
  -1 -18  -7    0.78    0.65 
  -4  19   7    0.41    0.60 
  -3  19   7    0.04    0.58 
  -2  19   7   -0.66    0.52 
   1 -19  -7    0.25    0.52 
  -1  19   7    0.57    0.60 
   0 -19  -7    0.89    0.62 
  -1  20  -8    0.49    0.65 
  -2  20  -8    0.14    0.69 
   1  19  -8   -0.38    0.57 
   0  19  -8    0.53    0.60 
  -1  19  -8    0.06    0.63 
  -2  19  -8   -0.09    0.61 
  -3  19  -8    0.15    0.62 
  -4  19  -8   -0.03    0.62 
   2  18  -8   -0.47    0.58 
   1  18  -8   -0.06    0.59 
   0  18  -8   -0.13    0.54 
  -1  18  -8    0.16    0.56 
  -2  18  -8    0.39    0.55 
  -3  18  -8    0.18    0.56 
  -4  18  -8   -0.30    0.54 
  -4  18  -8    0.50    0.52 
  -5  18  -8    0.12    0.53 
  -5  18  -8   -0.28    0.57 
   3  17  -8   -0.25    0.61 
   2  17  -8    0.45    0.59 
   1  17  -8    0.06    0.53 
   0  17  -8    0.37    0.53 
  -1  17  -8   -0.40    0.43 
  -2  17  -8    0.29    0.49 
  -3  17  -8    0.08    0.46 
  -3  17  -8   -0.44    0.48 
  -4  17  -8    0.34    0.55 
  -4  17  -8    0.34    0.44 
  -5  17  -8    0.03    0.51 
  -5  17  -8    0.29    0.48 
   4  16  -8    0.94    0.71 
  -4 -16   8   -0.80    0.52 
   3  16  -8    0.24    0.57 
  -3 -16   8   -0.62    0.52 
   2  16  -8    0.57    0.60 
   1  16  -8    0.47    0.51 
   0  16  -8   -0.40    0.39 
  -1  16  -8    0.11    0.51 
  -2  16  -8    0.50    0.47 
  -3  16  -8    0.46    0.48 
  -3  16  -8   -0.40    0.36 
  -4  16  -8    0.29    0.55 
  -4  16  -8    1.09    0.50 
  -5  16  -8    0.72    0.48 
  -5  16  -8    0.50    0.55 
  -6  16  -8   -0.07    0.53 
  -6  16  -8   -0.43    0.41 
  -5 -15   8    0.01    0.62 
   4  15  -8    0.30    0.65 
  -4 -15   8    0.64    0.57 
   3  15  -8   -0.13    0.50 
  -3 -15   8   -0.51    0.40 
   2  15  -8    0.00    0.47 
  -2 -15   8   -0.05    0.43 
   1  15  -8   -0.22    0.34 
   0  15  -8   -0.38    0.39 
  -1  15  -8    0.17    0.45 
  -2  15  -8   -0.23    0.36 
  -2  15  -8    0.06    0.42 
  -3  15  -8    0.88    0.51 
  -3  15  -8    0.21    0.37 
  -4  15  -8   -0.41    0.40 
  -4  15  -8   -0.25    0.35 
  -5  15  -8    0.31    0.47 
  -5  15  -8    0.56    0.46 
  -6  15  -8    0.24    0.48 
  -6  15  -8    0.55    0.52 
   5  14  -8   -0.24    0.64 
  -5 -14   8   -0.22    0.49 
   4  14  -8   -0.05    0.50 
  -4 -14   8   -0.18    0.42 
   3  14  -8   -0.04    0.43 
  -3 -14   8    0.16    0.40 
   2  14  -8   -0.42    0.39 
  -2 -14   8   -0.07    0.38 
   1  14  -8    0.01    0.39 
   0  14  -8    0.01    0.36 
  -1  14  -8    0.24    0.34 
  -2  14  -8    1.74    0.49 
  -2  14  -8    2.07    0.57 
  -3  14  -8    0.30    0.41 
  -3  14  -8    0.26    0.33 
  -4  14  -8    0.32    0.39 
  -4  14  -8    0.41    0.43 
  -5  14  -8    0.26    0.44 
  -6  14  -8   -0.05    0.52 
  -7  14  -8    0.08    0.52 
  -6 -13   8    0.26    0.58 
   5  13  -8   -0.23    0.59 
  -5 -13   8   -0.02    0.41 
   4  13  -8   -0.11    0.42 
  -4 -13   8    0.02    0.44 
   3  13  -8    0.10    0.48 
  -3 -13   8    0.71    0.44 
   2  13  -8    2.87    0.72 
  -2 -13   8    2.71    0.59 
   1  13  -8    0.14    0.34 
  -1 -13   8   -0.03    0.32 
   0  13  -8   -0.28    0.34 
  -1  13  -8   -0.04    0.23 
  -1  13  -8    0.50    0.36 
  -2  13  -8    0.72    0.36 
  -2  13  -8    0.58    0.41 
  -3  13  -8    0.73    0.38 
  -3  13  -8    1.84    0.54 
  -4  13  -8    0.56    0.42 
  -5  13  -8   -0.07    0.44 
  -6  13  -8    0.64    0.48 
  -7  13  -8    0.21    0.48 
  -6 -12   8    0.15    0.55 
   5  12  -8    0.82    0.63 
  -5 -12   8    0.27    0.42 
   4  12  -8    0.13    0.40 
  -4 -12   8    0.22    0.33 
   3  12  -8    2.27    0.60 
  -3 -12   8    3.52    0.66 
   2  12  -8   -0.19    0.31 
  -2 -12   8   -0.15    0.30 
   1  12  -8    4.44    0.79 
  -1 -12   8    7.85    0.79 
   0  12  -8    0.41    0.36 
  -1  12  -8    0.80    0.38 
  -1  12  -8    0.01    0.20 
  -2  12  -8    0.93    0.47 
  -2  12  -8    0.61    0.36 
  -3  12  -8    3.08    0.64 
  -4  12  -8   11.35    1.16 
  -5  12  -8    0.28    0.41 
  -6  12  -8    0.10    0.43 
  -7  12  -8    0.02    0.49 
  -6 -11   8    1.05    0.56 
   5  11  -8    0.27    0.52 
  -5 -11   8    0.19    0.38 
   4  11  -8    0.13    0.40 
  -4 -11   8   -0.35    0.30 
   3  11  -8    1.37    0.52 
  -3 -11   8    2.04    0.51 
   2  11  -8    0.70    0.41 
  -2 -11   8    1.42    0.42 
   1  11  -8    3.49    0.67 
  -1 -11   8    3.66    0.58 
   0  11  -8    2.41    0.55 
   0  11  -8    3.83    0.45 
   0 -11   8    2.39    0.45 
  -1  11  -8    0.60    0.27 
  -1  11  -8    2.11    0.50 
  -2  11  -8    4.94    0.74 
  -3  11  -8   21.78    1.61 
  -4  11  -8    0.16    0.35 
  -5  11  -8    0.29    0.40 
  -6  11  -8    0.56    0.48 
  -7  11  -8    0.27    0.50 
  -7 -10   8    0.24    0.54 
  -6 -10   8    0.28    0.44 
   5  10  -8    0.63    0.50 
  -5 -10   8    0.12    0.33 
   4  10  -8    0.29    0.42 
  -4 -10   8    0.21    0.32 
   3  10  -8    1.73    0.53 
  -3 -10   8    1.47    0.47 
   2  10  -8    2.76    0.58 
  -2 -10   8    4.76    0.66 
   1  10  -8    1.04    0.39 
  -1 -10   8    1.81    0.42 
   0  10  -8    0.16    0.26 
   0  10  -8    0.04    0.19 
   0 -10   8    0.05    0.21 
  -1  10  -8    1.89    0.47 
  -2  10  -8   18.52    1.40 
  -3  10  -8    6.13    0.81 
  -4  10  -8    5.30    0.76 
  -5  10  -8    0.12    0.37 
  -6  10  -8    0.37    0.43 
  -7  10  -8    1.06    0.53 
  -8  10  -8    0.51    0.55 
  -7  -9   8    0.64    0.59 
  -6  -9   8    0.26    0.42 
   5   9  -8    0.55    0.45 
  -5  -9   8    0.97    0.42 
   4   9  -8    4.40    0.82 
  -4  -9   8    2.96    0.62 
   3   9  -8    0.06    0.35 
  -3  -9   8    0.06    0.26 
   2   9  -8    0.53    0.34 
   2   9  -8    0.51    0.36 
   1   9  -8    5.65    0.72 
   1   9  -8    6.03    0.77 
   0   9  -8    0.96    0.26 
   0   9  -8    1.23    0.38 
   0   9  -8    1.14    0.35 
  -1   9  -8   11.61    1.10 
   1  -9   8   13.96    0.91 
  -2   9  -8    0.00    0.24 
  -3   9  -8    3.18    0.57 
  -4   9  -8    0.13    0.31 
  -5   9  -8   -0.42    0.30 
  -6   9  -8    0.39    0.42 
  -7   9  -8   -0.10    0.50 
  -8   9  -8    0.50    0.58 
  -7  -8   8   -0.19    0.34 
  -6  -8   8   -0.09    0.33 
   5   8  -8   -0.23    0.36 
  -5  -8   8   -0.13    0.26 
   4   8  -8   -0.35    0.39 
   4   8  -8    0.76    0.46 
   3   8  -8    5.06    0.85 
   3   8  -8    5.49    0.84 
   2   8  -8    1.05    0.37 
   2   8  -8    0.92    0.36 
   1   8  -8    7.36    0.78 
   1   8  -8    6.02    0.45 
   1   8  -8    4.74    0.67 
   0   8  -8    0.33    0.23 
   0   8  -8    0.61    0.28 
  -1   8  -8   10.21    0.75 
  -1   8  -8    9.43    0.89 
  -2   8  -8    0.75    0.32 
  -3   8  -8    0.13    0.28 
  -4   8  -8    0.25    0.31 
  -5   8  -8    2.69    0.58 
  -6   8  -8    2.72    0.67 
  -7   8  -8    1.67    0.65 
  -8   8  -8    0.67    0.62 
  -8  -7   8   -0.03    0.58 
  -7  -7   8    0.05    0.51 
  -6  -7   8   -0.10    0.40 
   5   7  -8    1.68    0.59 
   5   7  -8    0.00    0.43 
   4   7  -8    0.98    0.48 
   4   7  -8    1.20    0.52 
   3   7  -8    0.34    0.37 
   3   7  -8    0.72    0.35 
   2   7  -8    0.09    0.21 
   2   7  -8    0.20    0.27 
   1   7  -8    0.32    0.25 
   1   7  -8    0.28    0.13 
   1   7  -8    0.03    0.19 
   0   7  -8   16.72    1.15 
   0   7  -8   14.86    1.12 
  -1   7  -8    4.88    0.48 
  -1   7  -8    4.48    0.56 
  -2   7  -8    0.89    0.29 
  -3   7  -8    0.31    0.28 
  -4   7  -8    2.08    0.50 
  -5   7  -8    1.33    0.46 
  -6   7  -8   -0.49    0.32 
  -7   7  -8   -0.23    0.45 
  -8   7  -8   -0.11    0.55 
  -8  -6   8    0.76    0.67 
  -7  -6   8    0.11    0.47 
   6   6  -8   -0.35    0.54 
   5   6  -8    3.16    0.74 
   5   6  -8    2.49    0.71 
   4   6  -8    4.73    0.77 
   4   6  -8    2.60    0.68 
   3   6  -8    0.24    0.37 
   3   6  -8    0.48    0.32 
   2   6  -8    1.99    0.46 
   2   6  -8    1.93    0.42 
   1   6  -8    8.95    0.82 
   1   6  -8    9.08    0.86 
   0   6  -8   36.84    2.18 
   0   6  -8   34.36    2.18 
  -1   6  -8   20.32    1.37 
  -1   6  -8   20.27    1.29 
  -2   6  -8    2.22    0.41 
  -2   6  -8    2.62    0.28 
  -3   6  -8    1.92    0.43 
  -4   6  -8    7.44    0.88 
  -5   6  -8    1.60    0.47 
  -6   6  -8    0.95    0.46 
  -7   6  -8   -0.04    0.42 
  -8   6  -8    0.17    0.57 
  -8  -5   8    0.03    0.53 
  -7  -5   8   -0.14    0.47 
   6   5  -8    0.28    0.46 
   5   5  -8    0.46    0.45 
   4   5  -8    1.80    0.59 
   4   5  -8    4.22    0.72 
   3   5  -8    5.19    0.72 
   3   5  -8    3.94    0.69 
   2   5  -8    4.12    0.59 
   2   5  -8    4.72    0.67 
   1   5  -8    0.15    0.18 
   1   5  -8    0.24    0.21 
   0   5  -8    6.78    0.62 
   0   5  -8    5.96    0.62 
  -1   5  -8    2.89    0.35 
  -1   5  -8    2.36    0.40 
  -2   5  -8   14.15    0.91 
  -2   5  -8   13.81    1.04 
  -3   5  -8    0.37    0.15 
  -3   5  -8    0.29    0.26 
  -4   5  -8   10.28    1.00 
  -5   5  -8    1.53    0.48 
  -6   5  -8   -0.12    0.34 
  -7   5  -8   -0.12    0.47 
  -8   5  -8    0.06    0.61 
  -8  -4   8    0.65    0.64 
   7   4  -8   -0.13    0.43 
   6   4  -8    0.20    0.40 
   5   4  -8    0.08    0.44 
   4   4  -8    7.56    1.04 
   4   4  -8    9.34    1.01 
   3   4  -8    0.68    0.31 
   3   4  -8    0.72    0.35 
   2   4  -8    9.22    0.84 
   2   4  -8    8.65    0.90 
   1   4  -8    2.66    0.41 
   1   4  -8    4.30    0.56 
   0   4  -8    3.60    0.46 
   0   4  -8    2.70    0.39 
  -1   4  -8    0.08    0.16 
  -1   4  -8    0.07    0.15 
  -2   4  -8    0.21    0.19 
  -2   4  -8    0.81    0.21 
  -3   4  -8    0.59    0.19 
  -3   4  -8    0.46    0.23 
  -4   4  -8    0.79    0.35 
  -5   4  -8    0.48    0.38 
  -6   4  -8    0.27    0.43 
  -7   4  -8    0.33    0.52 
  -8   4  -8   -0.02    0.59 
  -8  -3   8   -0.89    0.44 
   7   3  -8   -0.25    0.44 
   6   3  -8    0.45    0.43 
   5   3  -8   -0.23    0.32 
   4   3  -8    0.49    0.36 
   4   3  -8    1.95    0.46 
   3   3  -8    0.46    0.27 
   3   3  -8    0.84    0.35 
   2   3  -8    0.08    0.20 
   2   3  -8   -0.15    0.13 
   1   3  -8    4.12    0.55 
   1   3  -8    3.30    0.42 
   0   3  -8   67.14    4.01 
   0   3  -8   71.84    3.88 
  -1   3  -8    0.65    0.22 
  -1   3  -8    1.09    0.25 
  -2   3  -8    7.48    0.75 
  -2   3  -8    8.76    0.65 
  -3   3  -8    1.34    0.27 
  -3   3  -8    1.38    0.33 
  -4   3  -8    0.13    0.23 
  -4   3  -8   -0.11    0.21 
  -5   3  -8    1.42    0.47 
  -6   3  -8    3.59    0.73 
  -7   3  -8    0.13    0.49 
  -8   3  -8    1.03    0.64 
   8   2  -8    0.69    0.59 
   7   2  -8   -0.23    0.37 
   6   2  -8    0.91    0.50 
   5   2  -8    3.50    0.73 
   4   2  -8   11.73    1.26 
   4   2  -8   12.98    1.06 
   3   2  -8    1.41    0.36 
   3   2  -8    1.19    0.37 
   2   2  -8    4.39    0.52 
   2   2  -8    4.51    0.63 
   1   2  -8    2.67    0.46 
   1   2  -8    3.17    0.38 
   0   2  -8    9.92    0.77 
   0   2  -8    8.58    0.66 
  -1   2  -8    5.65    0.54 
  -1   2  -8    4.47    0.50 
  -2   2  -8    0.16    0.14 
  -2   2  -8    0.07    0.19 
  -3   2  -8    2.24    0.36 
  -3   2  -8    1.91    0.39 
  -4   2  -8    1.60    0.42 
  -4   2  -8    1.07    0.33 
  -5   2  -8    3.90    0.69 
  -6   2  -8    2.83    0.71 
  -7   2  -8   -0.12    0.52 
  -8   2  -8   -0.10    0.67 
  -9  -1   8   -0.29    0.49 
   8   1  -8    0.21    0.56 
   7   1  -8   -0.05    0.47 
   6   1  -8    2.71    0.70 
   5   1  -8    0.37    0.34 
   4   1  -8    0.42    0.28 
   4   1  -8    0.38    0.34 
  -4  -1   8    0.78    0.21 
   3   1  -8    0.50    0.22 
   3   1  -8    0.74    0.34 
  -3  -1   8    0.11    0.16 
   2   1  -8    2.73    0.51 
   2   1  -8    2.89    0.39 
   1   1  -8    3.80    0.40 
   1   1  -8    4.16    0.57 
   0   1  -8    4.11    0.41 
   0   1  -8    4.09    0.52 
  -1   1  -8    7.64    0.63 
  -1   1  -8    7.21    0.65 
  -2   1  -8    2.74    0.41 
  -2   1  -8    2.28    0.37 
  -3   1  -8    2.40    0.41 
  -3   1  -8    2.33    0.44 
  -4   1  -8    3.75    0.64 
  -4   1  -8    3.99    0.56 
  -5   1  -8   28.70    1.99 
  -5   1  -8   27.75    1.88 
  -6   1  -8    0.13    0.39 
  -7   1  -8    2.23    0.77 
  -8   1  -8    1.65    0.71 
   9   0  -8    0.89    0.83 
   8   0  -8    0.38    0.59 
   7   0  -8    0.21    0.47 
   6   0  -8    1.43    0.54 
   5   0  -8    3.10    0.69 
   4   0  -8    5.15    0.80 
  -4   0   8    5.46    0.47 
   3   0  -8    6.14    0.78 
   3   0  -8    5.21    0.57 
  -3   0   8    5.89    0.48 
   2   0  -8   27.67    1.83 
   2   0  -8   25.95    1.61 
   0   0  -8   40.18    2.23 
   0   0  -8   37.67    2.38 
  -1   0  -8    2.43    0.37 
  -1   0  -8    3.11    0.42 
  -2   0  -8    0.78    0.25 
  -2   0  -8    0.97    0.27 
  -3   0  -8    1.25    0.35 
  -3   0  -8    1.41    0.35 
  -4   0  -8    6.44    0.72 
  -4   0  -8    4.17    0.66 
  -5   0  -8   -0.30    0.31 
  -5   0  -8    0.37    0.34 
  -6   0  -8    3.74    0.74 
  -7   0  -8    0.20    0.48 
  -8   0  -8    0.00    0.57 
   9  -1  -8    0.56    0.81 
   8  -1  -8    0.27    0.48 
   7  -1  -8    1.10    0.53 
   6  -1  -8    0.34    0.40 
   5  -1  -8    0.41    0.38 
  -5   1   8   -0.12    0.20 
   4  -1  -8    0.27    0.28 
  -4   1   8    1.74    0.31 
   3  -1  -8    0.02    0.17 
   3  -1  -8    0.10    0.20 
  -3   1   8    0.11    0.16 
   2  -1  -8   17.36    1.07 
   2  -1  -8   15.95    1.25 
  -2   1   8   16.48    1.09 
   1  -1  -8   23.03    1.54 
   1  -1  -8   22.06    1.31 
   0  -1  -8    0.07    0.18 
   0  -1  -8    0.21    0.12 
  -1  -1  -8   27.97    1.69 
  -1  -1  -8   28.15    1.78 
  -2  -1  -8    0.42    0.23 
  -2  -1  -8    0.21    0.18 
  -3  -1  -8    0.42    0.32 
  -3  -1  -8    0.44    0.26 
  -4  -1  -8    0.11    0.32 
  -4  -1  -8    0.23    0.35 
  -5  -1  -8   11.61    1.19 
  -5  -1  -8   12.62    1.17 
  -6  -1  -8    0.13    0.39 
  -6  -1  -8    0.89    0.55 
  -7  -1  -8    1.53    0.61 
  -8  -1  -8   -0.98    0.58 
   9  -2  -8   -0.65    0.64 
   8  -2  -8    0.70    0.57 
   7  -2  -8    0.68    0.53 
   6  -2  -8    0.12    0.39 
   5  -2  -8    1.51    0.49 
  -5   2   8    1.33    0.32 
   4  -2  -8    1.54    0.45 
  -4   2   8    1.86    0.34 
   3  -2  -8    4.69    0.68 
   3  -2  -8    4.37    0.45 
  -3   2   8    4.94    0.51 
   2  -2  -8    2.51    0.47 
   2  -2  -8    2.39    0.28 
  -2   2   8    2.85    0.40 
   1  -2  -8    0.80    0.28 
   1  -2  -8    0.75    0.15 
   0  -2  -8    3.22    0.45 
   0  -2  -8    2.14    0.29 
  -1  -2  -8    5.55    0.54 
  -1  -2  -8    6.49    0.64 
  -2  -2  -8    3.33    0.50 
  -2  -2  -8    2.45    0.41 
  -3  -2  -8    4.13    0.59 
  -3  -2  -8    4.96    0.67 
  -4  -2  -8   37.65    2.33 
  -4  -2  -8   33.25    2.33 
  -5  -2  -8    0.24    0.45 
  -5  -2  -8    0.46    0.35 
  -6  -2  -8    0.76    0.57 
  -6  -2  -8    0.54    0.44 
  -7  -2  -8    0.95    0.60 
  -8  -2  -8   -0.01    0.70 
   9  -3  -8    0.54    0.69 
   8  -3  -8    0.65    0.54 
   7  -3  -8    1.85    0.65 
   6  -3  -8    0.34    0.42 
  -6   3   8    0.31    0.26 
   5  -3  -8    0.95    0.45 
  -5   3   8    0.19    0.22 
   4  -3  -8    5.18    0.79 
  -4   3   8    5.84    0.60 
   3  -3  -8    0.28    0.22 
  -3   3   8    0.20    0.21 
   2  -3  -8   24.58    1.66 
   2  -3  -8   24.86    1.37 
  -2   3   8   22.08    1.52 
   1  -3  -8    6.58    0.68 
   1  -3  -8    5.41    0.40 
   0  -3  -8   15.36    0.91 
   0  -3  -8   12.39    1.02 
  -1  -3  -8   13.91    1.04 
  -1  -3  -8   13.59    0.94 
  -2  -3  -8    5.60    0.67 
  -2  -3  -8    4.42    0.54 
  -3  -3  -8    0.38    0.24 
  -3  -3  -8   -0.24    0.30 
  -4  -3  -8    0.02    0.39 
  -4  -3  -8    0.20    0.33 
  -5  -3  -8    2.06    0.64 
  -5  -3  -8    3.22    0.66 
  -6  -3  -8   -0.32    0.48 
  -6  -3  -8   -0.01    0.41 
  -7  -3  -8    1.41    0.75 
  -7  -3  -8    0.88    0.58 
   9  -4  -8    0.28    0.69 
   8  -4  -8   -0.47    0.44 
   7  -4  -8    0.25    0.44 
   6  -4  -8    2.06    0.63 
  -6   4   8    2.54    0.51 
   5  -4  -8    0.22    0.36 
  -5   4   8    0.02    0.22 
   4  -4  -8   -0.12    0.25 
  -4   4   8   -0.24    0.17 
   3  -4  -8    0.69    0.31 
  -3   4   8    1.18    0.31 
   2  -4  -8   -0.03    0.16 
  -2   4   8    0.47    0.23 
   1  -4  -8    0.12    0.10 
   1  -4  -8    0.22    0.18 
  -1   4   8    0.11    0.23 
   0  -4  -8    0.91    0.20 
   0  -4  -8    0.36    0.22 
  -1  -4  -8   10.86    0.91 
  -1  -4  -8   11.48    0.81 
  -2  -4  -8    7.88    0.81 
  -2  -4  -8    5.27    0.61 
  -3  -4  -8   -0.01    0.26 
  -3  -4  -8    0.53    0.42 
  -4  -4  -8   -0.20    0.41 
  -5  -4  -8    1.19    0.52 
  -5  -4  -8    1.47    0.61 
  -6  -4  -8    0.47    0.46 
  -6  -4  -8    0.16    0.56 
  -7  -4  -8   -0.41    0.46 
  -7  -4  -8    0.10    0.68 
   9  -5  -8   -0.30    0.68 
   8  -5  -8   -0.30    0.52 
   7  -5  -8    1.29    0.60 
  -7   5   8    1.56    0.48 
   6  -5  -8    4.45    0.84 
  -6   5   8    5.34    0.70 
   5  -5  -8    0.00    0.34 
  -5   5   8    0.09    0.26 
   4  -5  -8    0.64    0.37 
  -4   5   8    1.17    0.32 
   3  -5  -8    0.59    0.26 
  -3   5   8    0.78    0.28 
   2  -5  -8    0.35    0.22 
  -2   5   8    0.32    0.21 
   1  -5  -8    0.63    0.13 
   1  -5  -8    0.13    0.18 
  -1   5   8    0.52    0.27 
   0  -5  -8   19.54    1.40 
   0  -5  -8   20.18    1.22 
  -1  -5  -8    0.48    0.29 
  -1  -5  -8    0.28    0.18 
  -2  -5  -8    0.13    0.33 
  -3  -5  -8    1.30    0.54 
  -4  -5  -8    1.29    0.54 
  -5  -5  -8   -0.09    0.51 
  -6  -5  -8    0.94    0.66 
  -7  -5  -8    0.07    0.69 
  -7  -5  -8   -0.01    0.58 
   8  -6  -8   -0.47    0.45 
   7  -6  -8    0.79    0.48 
  -7   6   8    0.54    0.42 
   6  -6  -8    0.92    0.49 
  -6   6   8    0.52    0.37 
   5  -6  -8    6.71    0.94 
  -5   6   8    6.00    0.74 
   4  -6  -8    0.42    0.32 
  -4   6   8    0.13    0.25 
   3  -6  -8    6.85    0.82 
  -3   6   8    7.32    0.75 
   2  -6  -8    2.73    0.49 
  -2   6   8    2.97    0.51 
   1  -6  -8    4.81    0.61 
   1  -6  -8    4.42    0.34 
  -1   6   8    5.65    0.68 
   0  -6  -8    0.13    0.15 
   0  -6  -8   -0.04    0.18 
  -1  -6  -8    0.37    0.30 
  -2  -6  -8    0.40    0.42 
  -3  -6  -8    0.54    0.47 
  -4  -6  -8    2.11    0.68 
  -5  -6  -8    0.14    0.57 
  -6  -6  -8    0.04    0.63 
  -7  -6  -8    0.30    0.76 
  -7  -6  -8    0.51    0.61 
   8  -7  -8    0.25    0.55 
   7  -7  -8    4.76    0.93 
  -7   7   8    5.33    0.80 
   6  -7  -8   -0.13    0.40 
  -6   7   8    0.10    0.33 
   5  -7  -8   -0.13    0.35 
  -5   7   8   -0.03    0.29 
   4  -7  -8    0.88    0.41 
  -4   7   8    2.27    0.47 
   3  -7  -8    1.90    0.46 
  -3   7   8    2.18    0.44 
   2  -7  -8    3.58    0.56 
  -2   7   8    2.33    0.48 
   1  -7  -8    3.16    0.28 
   1  -7  -8    2.76    0.49 
  -1   7   8    3.78    0.61 
   0  -7  -8   -0.36    0.16 
   0  -7  -8    0.18    0.16 
  -1  -7  -8    2.55    0.54 
  -2  -7  -8    0.36    0.46 
  -3  -7  -8    2.25    0.65 
  -4  -7  -8   -0.63    0.40 
  -5  -7  -8    1.32    0.68 
  -6  -7  -8    0.28    0.64 
  -7  -7  -8   -0.53    0.70 
  -8   8   8    1.58    0.60 
   7  -8  -8   -0.21    0.42 
  -7   8   8    0.00    0.38 
   6  -8  -8   -0.23    0.40 
  -6   8   8    0.37    0.35 
   5  -8  -8    0.72    0.42 
  -5   8   8    2.70    0.56 
   4  -8  -8    2.44    0.55 
  -4   8   8    1.72    0.44 
   3  -8  -8    1.80    0.49 
  -3   8   8    2.90    0.52 
   2  -8  -8    1.18    0.37 
  -2   8   8    1.49    0.42 
   1  -8  -8    5.02    0.68 
  -1   8   8    5.71    0.76 
   0  -8  -8   -0.22    0.23 
  -1  -8  -8   -0.04    0.35 
  -2  -8  -8    0.83    0.50 
  -3  -8  -8    2.86    0.72 
  -4  -8  -8    0.28    0.55 
  -5  -8  -8    0.28    0.60 
  -6  -8  -8    0.21    0.70 
  -8   9   8    0.47    0.57 
   7  -9  -8    0.16    0.53 
  -7   9   8    0.86    0.49 
   6  -9  -8    0.50    0.48 
  -6   9   8    0.59    0.39 
   5  -9  -8    0.41    0.39 
  -5   9   8    0.26    0.35 
   4  -9  -8    0.20    0.35 
  -4   9   8    0.91    0.40 
   3  -9  -8    0.10    0.26 
  -3   9   8    0.00    0.27 
   2  -9  -8    7.26    0.83 
  -2   9   8    6.25    0.83 
   1  -9  -8    0.05    0.25 
  -1   9   8   -0.02    0.26 
   0  -9  -8    3.36    0.60 
  -1  -9  -8    1.43    0.49 
  -2  -9  -8    0.40    0.49 
  -3  -9  -8    0.61    0.51 
  -4  -9  -8    1.41    0.71 
  -5  -9  -8    0.11    0.57 
  -6  -9  -8    0.48    0.69 
  -8  10   8    0.17    0.51 
   7 -10  -8    0.15    0.55 
  -7  10   8   -0.01    0.41 
   6 -10  -8    0.30    0.50 
  -6  10   8   -0.13    0.35 
   5 -10  -8    2.34    0.62 
  -5  10   8    1.54    0.48 
   4 -10  -8    0.34    0.36 
  -4  10   8    0.86    0.41 
   3 -10  -8    0.18    0.30 
  -3  10   8    0.31    0.33 
   2 -10  -8   12.26    1.03 
  -2  10   8    9.20    1.06 
   1 -10  -8    3.00    0.58 
  -1  10   8    1.77    0.50 
   0 -10  -8    1.40    0.43 
  -1 -10  -8    0.83    0.43 
  -2 -10  -8    0.47    0.51 
  -3 -10  -8    0.16    0.52 
  -4 -10  -8   -0.43    0.58 
  -5 -10  -8    1.15    0.77 
  -6 -10  -8    0.63    0.75 
  -8  11   8    0.65    0.59 
  -7  11   8    0.34    0.51 
   6 -11  -8    0.57    0.55 
  -6  11   8    0.82    0.49 
   5 -11  -8    0.02    0.42 
  -5  11   8   -0.45    0.31 
   4 -11  -8   -0.06    0.29 
  -4  11   8   -0.13    0.30 
   3 -11  -8    0.42    0.34 
  -3  11   8    0.81    0.41 
   2 -11  -8    0.23    0.31 
  -2  11   8   -0.13    0.33 
   1 -11  -8    5.15    0.76 
  -1  11   8    5.28    0.82 
   0 -11  -8    3.00    0.62 
  -1 -11  -8    1.02    0.46 
  -2 -11  -8    4.27    0.84 
  -3 -11  -8    0.34    0.59 
  -4 -11  -8    0.47    0.68 
  -5 -11  -8    0.26    0.65 
  -8  12   8   -0.02    0.53 
  -7  12   8    0.51    0.52 
   6 -12  -8   -0.17    0.51 
  -6  12   8   -0.03    0.41 
   5 -12  -8    0.75    0.49 
  -5  12   8    0.75    0.46 
   4 -12  -8    0.87    0.43 
  -4  12   8    0.13    0.33 
   3 -12  -8    0.22    0.30 
  -3  12   8    0.56    0.37 
   2 -12  -8    0.32    0.32 
  -2  12   8    0.59    0.39 
   1 -12  -8    0.46    0.36 
  -1  12   8   -0.16    0.28 
   0 -12  -8    0.30    0.36 
  -1 -12  -8    0.00    0.37 
  -2 -12  -8    0.35    0.45 
  -3 -12  -8    1.80    0.78 
  -4 -12  -8   -0.25    0.59 
  -5 -12  -8    0.02    0.69 
  -7  13   8    0.04    0.56 
  -6  13   8    0.30    0.50 
   5 -13  -8    0.50    0.49 
  -5  13   8    0.46    0.43 
   4 -13  -8    0.97    0.47 
  -4  13   8    0.30    0.40 
   3 -13  -8    0.29    0.35 
  -3  13   8   -0.38    0.30 
   2 -13  -8    1.27    0.43 
  -2  13   8    1.49    0.51 
   1 -13  -8    0.65    0.37 
  -1  13   8    0.51    0.42 
   0 -13  -8    0.78    0.40 
  -1 -13  -8    0.57    0.42 
  -2 -13  -8    0.30    0.46 
  -3 -13  -8    0.50    0.51 
  -4 -13  -8    0.34    0.72 
  -7  14   8   -0.05    0.51 
  -6  14   8   -0.20    0.47 
   5 -14  -8    0.43    0.57 
  -5  14   8    0.23    0.47 
   4 -14  -8    0.51    0.39 
  -4  14   8    0.07    0.35 
   3 -14  -8    0.08    0.33 
  -3  14   8    0.04    0.34 
   2 -14  -8    0.20    0.29 
  -2  14   8    0.13    0.38 
   1 -14  -8    1.93    0.55 
  -1  14   8    1.43    0.53 
   0 -14  -8    0.75    0.42 
  -1 -14  -8    0.16    0.39 
  -2 -14  -8   -0.27    0.39 
  -3 -14  -8    0.95    0.66 
  -4 -14  -8    0.07    0.64 
  -7  15   8    0.46    0.55 
  -6  15   8    0.11    0.53 
  -5  15   8    0.06    0.47 
   4 -15  -8   -0.20    0.40 
  -4  15   8   -0.13    0.46 
   3 -15  -8    0.44    0.40 
  -3  15   8   -0.40    0.30 
   2 -15  -8   -0.23    0.32 
  -2  15   8    0.49    0.42 
   1 -15  -8    2.70    0.62 
  -1  15   8    0.48    0.45 
   0 -15  -8    0.73    0.45 
  -1 -15  -8    0.35    0.42 
  -2 -15  -8    0.11    0.50 
  -3 -15  -8   -0.20    0.57 
  -6  16   8    0.25    0.51 
  -5  16   8   -0.32    0.45 
   4 -16  -8    0.12    0.58 
  -4  16   8    0.20    0.49 
   3 -16  -8    0.42    0.43 
  -3  16   8    0.39    0.43 
   2 -16  -8   -0.11    0.36 
  -2  16   8    0.24    0.46 
   1 -16  -8    0.24    0.45 
  -1  16   8   -0.57    0.37 
   0 -16  -8    0.69    0.48 
  -1 -16  -8    0.12    0.48 
  -2 -16  -8   -0.03    0.53 
  -3 -16  -8    1.07    0.75 
  -5  17   8    0.27    0.51 
  -4  17   8    0.19    0.54 
   3 -17  -8    0.14    0.46 
  -3  17   8   -0.02    0.44 
   2 -17  -8    0.33    0.42 
  -2  17   8   -0.43    0.45 
   1 -17  -8   -0.14    0.39 
  -1  17   8    0.23    0.51 
   0 -17  -8    0.27    0.43 
  -1 -17  -8   -0.53    0.46 
  -2 -17  -8    1.00    0.67 
  -4  18   8    0.51    0.57 
  -3  18   8    0.89    0.64 
   2 -18  -8    0.46    0.46 
  -2  18   8    0.25    0.57 
   1 -18  -8    0.44    0.49 
   0 -18  -8    0.90    0.56 
  -1 -18  -8    0.34    0.65 
  -3  19   8    0.03    0.59 
   2 -19  -8   -0.27    0.59 
  -2  19   8   -0.18    0.63 
   1 -19  -8    0.35    0.58 
   1  19  -9    0.69    0.66 
   0  19  -9   -0.52    0.57 
  -1  19  -9    0.32    0.61 
  -2  19  -9    0.02    0.67 
  -3  19  -9    0.31    0.67 
   2  18  -9   -0.12    0.57 
   1  18  -9    0.36    0.61 
   0  18  -9    0.38    0.55 
  -1  18  -9    0.25    0.58 
  -2  18  -9    0.07    0.61 
  -3  18  -9    0.11    0.58 
  -4  18  -9    0.39    0.60 
   3  17  -9   -0.07    0.59 
   2  17  -9    0.54    0.62 
   1  17  -9    0.26    0.53 
   0  17  -9    0.36    0.57 
  -1  17  -9   -0.16    0.48 
  -2  17  -9   -0.09    0.52 
  -3  17  -9    0.32    0.55 
  -4  17  -9    0.29    0.59 
  -4  17  -9    0.01    0.42 
  -5  17  -9    0.71    0.59 
  -5  17  -9   -0.50    0.44 
   4  16  -9    0.32    0.56 
  -4 -16   9   -0.11    0.64 
   3  16  -9    0.31    0.67 
  -3 -16   9   -0.15    0.58 
   2  16  -9   -0.03    0.56 
   1  16  -9    0.26    0.52 
   0  16  -9    0.24    0.47 
  -1  16  -9    0.29    0.46 
  -2  16  -9   -0.32    0.44 
  -3  16  -9    0.28    0.44 
  -3  16  -9   -0.02    0.47 
  -4  16  -9   -0.19    0.54 
  -4  16  -9    0.03    0.39 
  -5  16  -9    0.43    0.47 
  -5  16  -9    0.45    0.54 
   4  15  -9    0.40    0.64 
  -4 -15   9   -0.48    0.49 
   3  15  -9    0.20    0.58 
  -3 -15   9    0.32    0.49 
   2  15  -9   -0.26    0.46 
   1  15  -9    0.15    0.44 
   0  15  -9    0.42    0.44 
  -1  15  -9    1.75    0.63 
  -2  15  -9   -0.08    0.44 
  -3  15  -9    0.21    0.44 
  -3  15  -9    0.08    0.34 
  -4  15  -9    0.19    0.38 
  -4  15  -9   -0.39    0.47 
  -5  15  -9    0.53    0.46 
  -5  15  -9   -0.05    0.52 
  -6  15  -9    1.01    0.58 
  -6  15  -9    0.71    0.55 
   5  14  -9   -0.11    0.60 
  -5 -14   9    0.71    0.60 
   4  14  -9   -0.39    0.39 
  -4 -14   9   -0.39    0.39 
   3  14  -9    0.58    0.58 
  -3 -14   9    0.83    0.47 
   2  14  -9    0.40    0.47 
  -2 -14   9    0.59    0.44 
   1  14  -9    0.20    0.42 
   0  14  -9   -0.14    0.38 
  -1  14  -9    0.15    0.40 
  -2  14  -9    0.06    0.36 
  -2  14  -9    0.66    0.43 
  -3  14  -9    0.04    0.34 
  -3  14  -9    0.25    0.43 
  -4  14  -9    0.27    0.45 
  -5  14  -9    0.00    0.43 
  -6  14  -9    0.05    0.51 
   5  13  -9    0.66    0.67 
  -5 -13   9   -0.01    0.48 
   4  13  -9    0.18    0.46 
  -4 -13   9   -0.26    0.35 
   3  13  -9    0.04    0.36 
  -3 -13   9    0.40    0.42 
   2  13  -9   -0.33    0.37 
  -2 -13   9    0.19    0.35 
   1  13  -9   -0.11    0.32 
  -1 -13   9    0.37    0.41 
   0  13  -9   -0.07    0.32 
  -1  13  -9   -0.31    0.31 
  -2  13  -9   -0.07    0.36 
  -2  13  -9    0.24    0.34 
  -3  13  -9   -0.01    0.35 
  -4  13  -9    1.09    0.51 
  -5  13  -9   -0.06    0.43 
  -6  13  -9    0.31    0.50 
  -7  13  -9    0.51    0.53 
  -6 -12   9    0.62    0.58 
   5  12  -9    0.23    0.58 
  -5 -12   9   -0.20    0.42 
   4  12  -9   -0.09    0.42 
  -4 -12   9    0.22    0.39 
   3  12  -9   -0.20    0.36 
  -3 -12   9    0.61    0.37 
   2  12  -9    0.15    0.33 
  -2 -12   9   -0.06    0.33 
   1  12  -9   -0.01    0.32 
  -1 -12   9    0.00    0.28 
   0  12  -9   -0.02    0.33 
  -1  12  -9    0.61    0.30 
  -1  12  -9    0.93    0.40 
  -2  12  -9    3.85    0.73 
  -3  12  -9    0.18    0.38 
  -4  12  -9    0.88    0.49 
  -5  12  -9    2.55    0.63 
  -6  12  -9    0.12    0.42 
  -7  12  -9   -0.06    0.47 
  -6 -11   9   -0.10    0.45 
   5  11  -9    0.27    0.56 
  -5 -11   9    1.33    0.56 
   4  11  -9    1.24    0.56 
  -4 -11   9    0.30    0.38 
   3  11  -9    4.28    0.78 
  -3 -11   9    3.39    0.65 
   2  11  -9    0.45    0.36 
  -2 -11   9    0.59    0.35 
   1  11  -9    0.37    0.33 
  -1 -11   9    0.75    0.32 
   0  11  -9    0.86    0.40 
   0 -11   9    0.70    0.34 
  -1  11  -9    5.99    0.81 
  -2  11  -9    2.83    0.60 
  -3  11  -9    7.87    0.94 
  -4  11  -9    1.05    0.48 
  -5  11  -9    0.49    0.39 
  -6  11  -9    0.12    0.44 
  -7  11  -9   -0.11    0.50 
  -7 -10   9   -0.20    0.56 
  -6 -10   9   -0.19    0.37 
   5  10  -9    1.16    0.61 
  -5 -10   9    0.36    0.36 
   4  10  -9    1.30    0.51 
  -4 -10   9    1.42    0.48 
   3  10  -9    0.83    0.43 
  -3 -10   9   -0.08    0.27 
   2  10  -9   -0.01    0.25 
  -2 -10   9    0.39    0.29 
   1  10  -9    0.11    0.28 
  -1 -10   9    0.02    0.25 
   0  10  -9    2.05    0.37 
   0  10  -9    1.86    0.46 
   0 -10   9    1.61    0.37 
  -1  10  -9    0.17    0.32 
  -3  10  -9    2.74    0.59 
  -4  10  -9    1.24    0.45 
  -5  10  -9    0.81    0.46 
  -6  10  -9    0.51    0.46 
  -7  10  -9   -0.29    0.44 
  -7  -9   9    0.14    0.55 
  -6  -9   9    0.22    0.41 
   5   9  -9    0.94    0.57 
  -5  -9   9   -0.15    0.36 
   4   9  -9    0.14    0.38 
  -4  -9   9   -0.19    0.25 
   3   9  -9    2.96    0.66 
   3   9  -9    2.17    0.64 
   2   9  -9    2.44    0.54 
   2   9  -9    1.27    0.51 
   1   9  -9   -0.12    0.23 
   1   9  -9    0.37    0.32 
   0   9  -9    0.85    0.33 
   0   9  -9    0.51    0.29 
  -1   9  -9   40.97    2.59 
  -2   9  -9    3.28    0.57 
  -3   9  -9    5.94    0.80 
  -4   9  -9    0.11    0.34 
  -5   9  -9    0.08    0.38 
  -6   9  -9    0.93    0.50 
  -7   9  -9    0.07    0.49 
  -7  -8   9    0.00    0.41 
  -6  -8   9   -0.14    0.37 
   5   8  -9    0.57    0.48 
  -5  -8   9    0.38    0.34 
   4   8  -9    0.21    0.40 
   4   8  -9    0.40    0.49 
   3   8  -9    1.27    0.51 
   3   8  -9    1.03    0.44 
   2   8  -9    0.07    0.27 
   2   8  -9    0.07    0.28 
   1   8  -9    4.98    0.69 
   1   8  -9    5.50    0.72 
   0   8  -9    1.27    0.36 
   0   8  -9    1.52    0.37 
  -1   8  -9   16.79    1.27 
  -1   8  -9   17.90    1.19 
  -2   8  -9    0.39    0.29 
  -3   8  -9   -0.36    0.25 
  -4   8  -9    2.08    0.53 
  -5   8  -9    0.63    0.43 
  -6   8  -9    0.03    0.45 
  -7   8  -9    1.67    0.66 
  -8   8  -9    0.48    0.58 
  -7  -7   9    0.08    0.43 
  -6  -7   9    0.01    0.32 
   5   7  -9    0.39    0.46 
   5   7  -9    0.51    0.51 
   4   7  -9   -0.27    0.38 
   4   7  -9    0.21    0.41 
   3   7  -9    0.59    0.38 
   3   7  -9    1.99    0.53 
   2   7  -9    5.58    0.79 
   2   7  -9    7.56    0.82 
   1   7  -9   -0.05    0.20 
   1   7  -9   -0.03    0.23 
   0   7  -9    3.43    0.51 
   0   7  -9    3.75    0.52 
  -1   7  -9    0.45    0.24 
  -2   7  -9    0.98    0.34 
  -3   7  -9    6.97    0.81 
  -4   7  -9    0.00    0.28 
  -5   7  -9    0.61    0.41 
  -6   7  -9    1.75    0.62 
  -7   7  -9    0.93    0.58 
  -8   7  -9    0.01    0.52 
  -8  -6   9    0.36    0.54 
  -7  -6   9   -0.23    0.50 
   6   6  -9    0.44    0.57 
   5   6  -9    0.16    0.43 
   5   6  -9    0.73    0.49 
   4   6  -9   -0.49    0.32 
   4   6  -9   -0.09    0.38 
   3   6  -9    0.44    0.38 
   3   6  -9    0.41    0.33 
   2   6  -9   11.93    1.13 
   2   6  -9   11.71    0.99 
   1   6  -9    0.71    0.26 
   1   6  -9    0.71    0.28 
   0   6  -9   22.14    1.56 
   0   6  -9   26.15    1.61 
  -1   6  -9    3.04    0.40 
  -1   6  -9    2.20    0.44 
  -2   6  -9    3.15    0.35 
  -2   6  -9    3.26    0.51 
  -3   6  -9    1.41    0.39 
  -4   6  -9    1.98    0.52 
  -5   6  -9   -0.04    0.38 
  -6   6  -9    0.03    0.44 
  -7   6  -9    0.31    0.50 
  -8   6  -9    0.40    0.56 
  -8  -5   9    0.44    0.59 
   7   5  -9    0.36    0.57 
   6   5  -9    0.12    0.56 
   5   5  -9   -0.60    0.33 
   5   5  -9    0.22    0.41 
   4   5  -9    0.15    0.36 
   4   5  -9    0.29    0.40 
   3   5  -9    2.61    0.61 
   3   5  -9    4.24    0.65 
   2   5  -9    0.35    0.26 
   2   5  -9    0.35    0.24 
   1   5  -9    8.11    0.80 
   1   5  -9    7.05    0.71 
   0   5  -9    0.31    0.19 
   0   5  -9    0.50    0.24 
  -1   5  -9   11.22    0.80 
  -1   5  -9    9.96    0.83 
  -2   5  -9    0.17    0.16 
  -2   5  -9   -0.02    0.18 
  -3   5  -9    0.44    0.25 
  -4   5  -9   -0.03    0.26 
  -5   5  -9   -0.01    0.32 
  -6   5  -9    0.17    0.42 
  -7   5  -9    0.68    0.57 
  -8   5  -9    0.36    0.52 
  -8  -4   9    0.25    0.56 
   7   4  -9    0.32    0.44 
   6   4  -9    1.47    0.60 
   5   4  -9    0.41    0.45 
   5   4  -9    0.13    0.43 
   4   4  -9    0.29    0.36 
   4   4  -9    1.35    0.54 
   3   4  -9    1.69    0.42 
   3   4  -9    1.51    0.44 
   2   4  -9    0.55    0.28 
   2   4  -9    0.36    0.23 
   1   4  -9   49.22    3.04 
   1   4  -9   50.21    2.90 
   0   4  -9    0.12    0.15 
   0   4  -9    0.52    0.21 
  -1   4  -9    0.62    0.23 
  -1   4  -9    1.04    0.27 
  -2   4  -9    0.40    0.19 
  -2   4  -9    0.03    0.16 
  -3   4  -9    2.55    0.47 
  -3   4  -9    2.87    0.38 
  -4   4  -9    6.60    0.80 
  -5   4  -9    1.05    0.41 
  -6   4  -9    0.72    0.51 
  -7   4  -9   -0.23    0.49 
  -8   4  -9   -0.02    0.52 
   8   3  -9    0.02    0.69 
   7   3  -9   -0.32    0.42 
   6   3  -9    0.83    0.54 
   5   3  -9    2.29    0.66 
   4   3  -9    8.38    1.08 
   4   3  -9    8.47    0.95 
   3   3  -9    0.21    0.24 
   3   3  -9    0.00    0.25 
   2   3  -9    6.01    0.66 
   2   3  -9    6.42    0.81 
   1   3  -9    0.90    0.31 
   1   3  -9    0.90    0.25 
   0   3  -9   39.17    2.47 
   0   3  -9   41.02    2.35 
  -1   3  -9    3.84    0.48 
  -1   3  -9    3.33    0.46 
  -2   3  -9    6.47    0.69 
  -2   3  -9    7.00    0.60 
  -3   3  -9    4.70    0.51 
  -3   3  -9    4.04    0.61 
  -4   3  -9    0.20    0.22 
  -4   3  -9    0.27    0.28 
  -5   3  -9    1.16    0.46 
  -6   3  -9    0.84    0.51 
  -7   3  -9   -0.20    0.50 
  -8   3  -9   -0.11    0.55 
   8   2  -9    0.21    0.58 
   7   2  -9    0.30    0.48 
   6   2  -9    0.01    0.34 
   5   2  -9    2.21    0.60 
   4   2  -9    0.33    0.28 
   4   2  -9    0.27    0.32 
   3   2  -9    0.10    0.25 
   3   2  -9    0.05    0.19 
   2   2  -9    4.30    0.66 
   2   2  -9    4.86    0.55 
   1   2  -9    5.03    0.66 
   1   2  -9    4.98    0.51 
   0   2  -9    8.75    0.76 
   0   2  -9    8.71    0.67 
  -1   2  -9   14.71    1.03 
  -1   2  -9   13.47    0.99 
  -2   2  -9    0.22    0.20 
  -2   2  -9    0.30    0.20 
  -3   2  -9    6.39    0.62 
  -3   2  -9    5.13    0.66 
  -4   2  -9    6.73    0.68 
  -4   2  -9    5.61    0.76 
  -5   2  -9    1.10    0.44 
  -6   2  -9   -0.12    0.41 
  -7   2  -9    0.24    0.58 
  -8   2  -9    0.50    0.63 
   8   1  -9    1.16    0.74 
   7   1  -9    0.10    0.45 
   6   1  -9    4.77    0.90 
   5   1  -9    0.99    0.49 
   4   1  -9   -0.19    0.23 
   4   1  -9   -0.36    0.27 
   3   1  -9   10.75    0.86 
   3   1  -9    9.94    1.08 
   2   1  -9    6.63    0.62 
   2   1  -9    6.21    0.78 
   1   1  -9   38.47    2.33 
   1   1  -9   34.26    2.09 
   0   1  -9    1.51    0.27 
   0   1  -9    1.09    0.30 
  -1   1  -9    1.25    0.28 
  -1   1  -9    1.77    0.35 
  -2   1  -9    0.87    0.26 
  -2   1  -9    0.29    0.21 
  -3   1  -9    0.58    0.26 
  -3   1  -9    0.68    0.30 
  -4   1  -9    0.85    0.33 
  -4   1  -9    0.17    0.31 
  -5   1  -9    1.73    0.50 
  -5   1  -9    2.43    0.49 
  -6   1  -9    0.25    0.42 
  -7   1  -9    0.33    0.51 
  -8   1  -9    0.70    0.64 
   9   0  -9    1.01    0.88 
   8   0  -9    0.29    0.54 
   7   0  -9    0.91    0.57 
   6   0  -9    0.32    0.39 
   5   0  -9    1.49    0.50 
   4   0  -9    0.48    0.29 
   4   0  -9    0.75    0.37 
  -4   0   9    1.65    0.28 
   3   0  -9    0.24    0.21 
   3   0  -9   -0.15    0.21 
  -3   0   9    0.31    0.18 
   2   0  -9   40.74    2.35 
   2   0  -9   39.61    2.60 
   1   0  -9   -0.06    0.09 
   1   0  -9    0.00    0.19 
   0   0  -9    5.14    0.63 
   0   0  -9    6.15    0.50 
  -1   0  -9    0.12    0.18 
  -1   0  -9   -0.02    0.16 
  -2   0  -9    1.93    0.38 
  -2   0  -9    2.01    0.38 
  -3   0  -9    0.83    0.33 
  -3   0  -9    1.10    0.34 
  -4   0  -9    8.98    0.89 
  -4   0  -9    8.49    0.93 
  -5   0  -9    8.39    0.93 
  -5   0  -9    8.03    0.99 
  -6   0  -9    1.79    0.56 
  -7   0  -9    0.33    0.52 
  -8   0  -9    0.20    0.68 
   9  -1  -9    0.33    0.75 
   8  -1  -9   -0.32    0.49 
   7  -1  -9   -0.28    0.37 
   6  -1  -9    0.18    0.37 
   5  -1  -9   -0.16    0.34 
   4  -1  -9    5.23    0.85 
  -4   1   9    6.47    0.59 
   3  -1  -9    0.99    0.27 
   3  -1  -9    0.88    0.36 
  -3   1   9    1.39    0.30 
   2  -1  -9   11.35    0.80 
   2  -1  -9   11.40    1.09 
   1  -1  -9   26.49    1.77 
   1  -1  -9   26.05    1.53 
   0  -1  -9    5.85    0.65 
   0  -1  -9    4.96    0.47 
  -1  -1  -9    0.69    0.25 
  -1  -1  -9    0.36    0.18 
  -2  -1  -9   16.42    1.24 
  -2  -1  -9   19.35    1.24 
  -3  -1  -9   15.16    1.12 
  -3  -1  -9   13.43    1.10 
  -4  -1  -9   39.88    2.58 
  -4  -1  -9   40.20    2.57 
  -5  -1  -9    0.82    0.42 
  -5  -1  -9    1.11    0.47 
  -6  -1  -9    0.11    0.41 
  -6  -1  -9    0.24    0.51 
  -7  -1  -9    0.32    0.56 
   9  -2  -9    1.18    0.83 
   8  -2  -9    0.88    0.63 
   7  -2  -9    0.21    0.41 
   6  -2  -9    1.53    0.57 
   5  -2  -9    0.46    0.36 
  -5   2   9    0.80    0.28 
   4  -2  -9    1.23    0.43 
  -4   2   9    1.53    0.34 
   3  -2  -9   13.79    1.20 
   3  -2  -9   14.74    0.97 
  -3   2   9   14.23    1.01 
   2  -2  -9    2.61    0.51 
   2  -2  -9    2.26    0.30 
  -2   2   9    1.97    0.38 
   1  -2  -9    0.79    0.17 
   1  -2  -9    0.60    0.25 
   0  -2  -9    3.62    0.39 
   0  -2  -9    7.09    0.67 
  -1  -2  -9    4.41    0.48 
  -1  -2  -9    3.66    0.52 
  -2  -2  -9   23.15    1.55 
  -2  -2  -9   21.39    1.46 
  -3  -2  -9    3.92    0.60 
  -3  -2  -9    3.72    0.61 
  -4  -2  -9   16.91    1.36 
  -4  -2  -9   15.96    1.31 
  -5  -2  -9    0.17    0.34 
  -5  -2  -9   -0.25    0.41 
  -6  -2  -9    0.05    0.40 
  -6  -2  -9   -0.21    0.46 
  -7  -2  -9    0.92    0.56 
   9  -3  -9    1.08    0.79 
   8  -3  -9    0.67    0.60 
   7  -3  -9    2.15    0.67 
   6  -3  -9    0.98    0.52 
   5  -3  -9   -0.06    0.37 
  -5   3   9    0.30    0.26 
   4  -3  -9    1.83    0.50 
  -4   3   9    2.19    0.40 
   3  -3  -9    1.50    0.27 
   3  -3  -9    1.77    0.47 
  -3   3   9    1.75    0.36 
   2  -3  -9    0.46    0.16 
   2  -3  -9    0.28    0.21 
  -2   3   9    0.33    0.24 
   1  -3  -9   11.75    0.93 
   1  -3  -9   10.40    0.69 
   0  -3  -9    0.28    0.22 
   0  -3  -9    0.85    0.21 
  -1  -3  -9    0.62    0.25 
  -1  -3  -9    0.57    0.23 
  -2  -3  -9    0.07    0.22 
  -2  -3  -9    0.30    0.25 
  -3  -3  -9    7.65    0.80 
  -3  -3  -9    8.08    0.91 
  -4  -3  -9    8.44    1.00 
  -4  -3  -9    8.62    0.94 
  -5  -3  -9    0.44    0.51 
  -5  -3  -9    1.08    0.47 
  -6  -3  -9    0.64    0.50 
  -6  -3  -9    0.00    0.52 
  -7  -3  -9   -0.24    0.55 
   9  -4  -9   -0.13    0.60 
   8  -4  -9   -0.15    0.57 
   7  -4  -9    0.51    0.47 
   6  -4  -9    2.38    0.67 
  -6   4   9    2.34    0.48 
   5  -4  -9   -0.33    0.28 
  -5   4   9   -0.04    0.23 
   4  -4  -9   -0.28    0.25 
  -4   4   9    0.05    0.23 
   3  -4  -9   -0.01    0.23 
  -3   4   9    0.17    0.22 
   2  -4  -9    0.07    0.20 
   2  -4  -9    0.01    0.11 
  -2   4   9   -0.06    0.20 
   1  -4  -9    7.60    0.81 
   1  -4  -9    7.31    0.50 
   0  -4  -9    7.51    0.54 
   0  -4  -9    6.48    0.74 
  -1  -4  -9    5.23    0.65 
  -1  -4  -9    4.30    0.50 
  -2  -4  -9    1.89    0.47 
  -2  -4  -9    1.61    0.36 
  -3  -4  -9    3.56    0.69 
  -3  -4  -9    3.03    0.53 
  -4  -4  -9   -0.19    0.28 
  -4  -4  -9   -0.01    0.42 
  -5  -4  -9    0.20    0.37 
  -5  -4  -9    0.81    0.52 
  -6  -4  -9   -0.25    0.39 
  -6  -4  -9    0.70    0.61 
  -7  -4  -9    0.14    0.61 
  -7  -4  -9   -0.47    0.67 
   9  -5  -9   -0.26    0.68 
   8  -5  -9   -0.07    0.52 
   7  -5  -9    0.68    0.49 
   6  -5  -9    0.20    0.39 
  -6   5   9    1.07    0.38 
   5  -5  -9    1.92    0.56 
  -5   5   9    1.68    0.42 
   4  -5  -9    3.26    0.65 
  -4   5   9    3.60    0.53 
   3  -5  -9   11.22    1.13 
  -3   5   9   12.86    0.98 
   2  -5  -9    1.92    0.44 
  -2   5   9    2.77    0.48 
   1  -5  -9    0.80    0.29 
   1  -5  -9    0.64    0.15 
   0  -5  -9    0.35    0.24 
   0  -5  -9    0.37    0.18 
  -1  -5  -9    3.10    0.42 
  -1  -5  -9    6.03    0.70 
  -2  -5  -9    0.63    0.38 
  -2  -5  -9    0.53    0.26 
  -3  -5  -9    2.10    0.49 
  -3  -5  -9    2.59    0.65 
  -4  -5  -9    2.40    0.66 
  -4  -5  -9    2.76    0.60 
  -5  -5  -9    0.73    0.47 
  -5  -5  -9    0.49    0.54 
  -6  -5  -9    0.63    0.52 
  -6  -5  -9    0.12    0.65 
  -7  -5  -9    0.05    0.66 
  -7  -5  -9    0.66    0.58 
   9  -6  -9   -0.47    0.81 
   8  -6  -9   -0.32    0.51 
   7  -6  -9    2.32    0.69 
  -7   6   9    3.10    0.62 
   6  -6  -9    0.51    0.45 
  -6   6   9    0.25    0.33 
   5  -6  -9    0.61    0.39 
  -5   6   9    0.26    0.29 
   4  -6  -9    0.08    0.29 
  -4   6   9    0.53    0.33 
   3  -6  -9   -0.02    0.24 
  -3   6   9    0.17    0.22 
   2  -6  -9    3.87    0.63 
  -2   6   9    4.94    0.66 
   1  -6  -9    4.11    0.60 
   1  -6  -9    3.64    0.31 
  -1   6   9    4.45    0.65 
   0  -6  -9    5.27    0.46 
   0  -6  -9    3.22    0.60 
  -1  -6  -9    0.01    0.29 
  -1  -6  -9    0.19    0.16 
  -2  -6  -9   -0.16    0.35 
  -2  -6  -9    0.27    0.23 
  -3  -6  -9    0.71    0.50 
  -4  -6  -9    0.28    0.47 
  -5  -6  -9    0.52    0.59 
  -5  -6  -9    0.84    0.49 
  -6  -6  -9    0.85    0.55 
  -6  -6  -9    1.02    0.68 
  -7  -6  -9    0.32    0.77 
  -7  -6  -9    0.54    0.66 
   8  -7  -9    1.39    0.66 
   7  -7  -9    0.58    0.56 
  -7   7   9    0.62    0.42 
   6  -7  -9    0.66    0.46 
  -6   7   9    0.46    0.37 
   5  -7  -9    0.37    0.42 
  -5   7   9    0.50    0.38 
   4  -7  -9    0.12    0.33 
  -4   7   9    1.35    0.41 
   3  -7  -9    0.78    0.35 
  -3   7   9    0.51    0.30 
   2  -7  -9   -0.06    0.20 
  -2   7   9    0.25    0.28 
   1  -7  -9    2.78    0.53 
  -1   7   9    4.01    0.65 
   0  -7  -9    6.12    0.51 
   0  -7  -9    5.03    0.74 
  -1  -7  -9    0.25    0.35 
  -1  -7  -9    0.03    0.19 
  -2  -7  -9    1.72    0.58 
  -3  -7  -9    0.55    0.46 
  -4  -7  -9   -0.10    0.43 
  -5  -7  -9    1.04    0.63 
  -6  -7  -9   -0.25    0.63 
  -6  -7  -9   -0.20    0.47 
   8  -8  -9    0.74    0.75 
   7  -8  -9   -0.47    0.39 
  -7   8   9    0.65    0.46 
   6  -8  -9    0.34    0.43 
  -6   8   9    0.31    0.36 
   5  -8  -9    0.53    0.40 
  -5   8   9    0.16    0.35 
   4  -8  -9    0.77    0.40 
  -4   8   9    0.81    0.35 
   3  -8  -9    1.67    0.46 
  -3   8   9    1.11    0.38 
   2  -8  -9    1.52    0.41 
  -2   8   9    0.93    0.40 
   1  -8  -9    1.66    0.43 
  -1   8   9    0.58    0.37 
   0  -8  -9    0.02    0.25 
   0  -8  -9    0.33    0.22 
  -1  -8  -9    1.16    0.46 
  -2  -8  -9    0.38    0.44 
  -3  -8  -9    0.20    0.46 
  -4  -8  -9    0.03    0.55 
  -5  -8  -9    0.49    0.61 
  -6  -8  -9    0.84    0.75 
  -8   9   9    0.45    0.55 
   7  -9  -9    0.09    0.51 
  -7   9   9    0.13    0.40 
   6  -9  -9    0.34    0.44 
  -6   9   9    0.51    0.41 
   5  -9  -9    2.04    0.60 
  -5   9   9    0.90    0.43 
   4  -9  -9    2.88    0.64 
  -4   9   9    1.73    0.51 
   3  -9  -9    2.07    0.51 
  -3   9   9    2.38    0.52 
   2  -9  -9   13.90    1.20 
  -2   9   9   14.02    1.21 
   1  -9  -9   -0.14    0.23 
  -1   9   9    0.29    0.35 
   0  -9  -9    0.76    0.38 
  -1  -9  -9    0.32    0.37 
  -2  -9  -9    0.58    0.51 
  -3  -9  -9   -0.24    0.49 
  -4  -9  -9    0.00    0.57 
  -5  -9  -9   -0.02    0.63 
  -6  -9  -9    0.54    0.69 
  -8  10   9    0.02    0.53 
   7 -10  -9   -0.55    0.57 
  -7  10   9   -0.08    0.45 
   6 -10  -9   -0.19    0.42 
  -6  10   9    0.29    0.37 
   5 -10  -9    2.19    0.60 
  -5  10   9    0.71    0.43 
   4 -10  -9    0.14    0.35 
  -4  10   9    0.52    0.36 
   3 -10  -9    0.05    0.29 
  -3  10   9    0.59    0.36 
   2 -10  -9    0.33    0.33 
  -2  10   9    0.38    0.33 
   1 -10  -9    6.28    0.83 
  -1  10   9    5.39    0.86 
   0 -10  -9    0.37    0.33 
  -1 -10  -9    3.05    0.68 
  -2 -10  -9    1.17    0.58 
  -3 -10  -9    1.46    0.73 
  -4 -10  -9    0.42    0.64 
  -5 -10  -9    0.05    0.72 
  -8  11   9   -0.10    0.54 
  -7  11   9    0.43    0.49 
   6 -11  -9   -0.12    0.47 
  -6  11   9    0.16    0.43 
   5 -11  -9    0.12    0.39 
  -5  11   9    1.01    0.48 
   4 -11  -9    0.91    0.44 
  -4  11   9    1.28    0.46 
   3 -11  -9    0.59    0.35 
  -3  11   9    0.26    0.33 
   2 -11  -9   -0.12    0.27 
  -2  11   9    0.17    0.32 
   1 -11  -9   -0.19    0.26 
  -1  11   9   -0.01    0.36 
   0 -11  -9    2.51    0.57 
  -1 -11  -9    0.49    0.42 
  -2 -11  -9    1.10    0.61 
  -3 -11  -9    0.23    0.62 
  -4 -11  -9    0.28    0.68 
  -5 -11  -9    0.00    0.70 
  -7  12   9    0.79    0.56 
   6 -12  -9   -0.12    0.50 
  -6  12   9    0.45    0.48 
   5 -12  -9   -0.05    0.39 
  -5  12   9    0.09    0.40 
   4 -12  -9   -0.34    0.32 
  -4  12   9   -0.06    0.36 
   3 -12  -9   -0.15    0.31 
  -3  12   9    0.32    0.40 
   2 -12  -9    0.11    0.30 
  -2  12   9    0.12    0.36 
   1 -12  -9    1.25    0.43 
  -1  12   9    0.50    0.39 
   0 -12  -9    1.02    0.43 
  -1 -12  -9    0.37    0.41 
  -2 -12  -9    0.65    0.50 
  -3 -12  -9    0.64    0.72 
  -4 -12  -9   -0.42    0.65 
  -5 -12  -9    0.48    0.75 
  -7  13   9    0.14    0.57 
  -6  13   9    0.04    0.47 
   5 -13  -9    0.60    0.51 
  -5  13   9    0.45    0.47 
   4 -13  -9    0.41    0.41 
  -4  13   9    0.31    0.43 
   3 -13  -9   -0.22    0.30 
  -3  13   9    0.24    0.39 
   2 -13  -9    1.16    0.44 
  -2  13   9    0.75    0.51 
   1 -13  -9    0.54    0.38 
  -1  13   9   -0.07    0.37 
   0 -13  -9    0.22    0.34 
  -1 -13  -9    0.33    0.44 
  -2 -13  -9    0.77    0.50 
  -3 -13  -9   -0.27    0.52 
  -4 -13  -9    0.21    0.72 
  -7  14   9    0.56    0.59 
  -6  14   9    0.07    0.48 
   5 -14  -9    0.64    0.53 
  -5  14   9    0.41    0.50 
   4 -14  -9    0.18    0.41 
  -4  14   9    0.90    0.52 
   3 -14  -9    0.05    0.37 
  -3  14   9    0.17    0.44 
   2 -14  -9    0.59    0.38 
  -2  14   9    0.35    0.44 
   1 -14  -9    1.51    0.48 
  -1  14   9    2.05    0.61 
   0 -14  -9    0.14    0.36 
  -1 -14  -9    0.16    0.38 
  -2 -14  -9    0.29    0.50 
  -3 -14  -9    0.73    0.59 
  -6  15   9   -0.07    0.55 
  -5  15   9   -0.35    0.44 
   4 -15  -9    0.57    0.49 
  -4  15   9    0.85    0.54 
   3 -15  -9   -0.46    0.32 
  -3  15   9    1.10    0.60 
   2 -15  -9   -0.19    0.37 
  -2  15   9   -0.15    0.39 
   1 -15  -9    0.16    0.39 
  -1  15   9    0.17    0.43 
   0 -15  -9    0.55    0.43 
  -1 -15  -9    0.33    0.49 
  -2 -15  -9    1.07    0.63 
  -3 -15  -9    1.27    0.81 
  -6  16   9    0.48    0.55 
  -5  16   9    0.22    0.53 
   4 -16  -9    0.03    0.45 
  -4  16   9    0.88    0.62 
   3 -16  -9    0.45    0.47 
  -3  16   9    0.56    0.51 
   2 -16  -9    0.41    0.43 
  -2  16   9    1.12    0.56 
   1 -16  -9    0.22    0.40 
   0 -16  -9    0.25    0.47 
  -1 -16  -9   -0.59    0.42 
  -2 -16  -9    0.77    0.60 
  -5  17   9    0.34    0.58 
  -4  17   9    1.28    0.65 
   3 -17  -9    0.54    0.53 
  -3  17   9   -0.12    0.49 
   2 -17  -9    0.25    0.45 
  -2  17   9   -0.29    0.49 
   1 -17  -9    0.57    0.46 
   0 -17  -9    0.03    0.44 
  -1 -17  -9   -0.35    0.46 
  -4  18   9    0.21    0.62 
   3 -18  -9    0.10    0.62 
  -3  18   9    0.44    0.63 
   2 -18  -9    0.39    0.52 
  -2  18   9    0.30    0.58 
   1 -18  -9    0.93    0.62 
   0 -18  -9    0.30    0.60 
   0  19 -10   -0.29    0.54 
  -1  19 -10    0.58    0.68 
  -2  19 -10    0.25    0.70 
   2  18 -10    0.63    0.63 
   1  18 -10   -0.95    0.55 
   0  18 -10    0.15    0.60 
  -1  18 -10    0.14    0.60 
  -2  18 -10   -0.55    0.54 
  -3  18 -10    1.44    0.74 
  -4  18 -10    0.93    0.61 
   3  17 -10    1.36    0.74 
   2  17 -10   -0.34    0.58 
   1  17 -10    0.33    0.51 
   0  17 -10    0.54    0.55 
  -1  17 -10   -0.47    0.49 
  -2  17 -10    0.85    0.57 
  -3  17 -10   -0.98    0.47 
  -4  17 -10   -0.36    0.52 
  -4  17 -10    0.32    0.60 
   3  16 -10   -0.08    0.61 
   2  16 -10   -0.19    0.50 
   1  16 -10   -0.57    0.44 
   0  16 -10   -0.32    0.49 
  -1  16 -10   -0.03    0.53 
  -2  16 -10    0.15    0.45 
  -3  16 -10   -0.51    0.46 
  -4  16 -10    0.05    0.57 
  -4  16 -10   -0.29    0.38 
  -5  16 -10    0.46    0.49 
  -5  16 -10    0.18    0.52 
   4  15 -10    0.48    0.63 
  -4 -15  10    0.75    0.59 
   3  15 -10   -0.36    0.48 
  -3 -15  10   -0.30    0.45 
   2  15 -10    0.52    0.58 
   1  15 -10   -0.15    0.43 
   0  15 -10   -0.29    0.45 
  -1  15 -10   -0.03    0.45 
  -2  15 -10   -0.52    0.40 
  -3  15 -10    0.50    0.42 
  -3  15 -10    0.09    0.45 
  -4  15 -10    0.03    0.53 
  -4  15 -10    0.21    0.42 
  -5  15 -10    0.32    0.46 
  -5  15 -10    0.28    0.57 
  -6  15 -10    0.52    0.53 
   5  14 -10   -0.05    0.74 
  -5 -14  10    0.33    0.61 
   4  14 -10    0.36    0.57 
  -4 -14  10   -0.19    0.41 
   3  14 -10    0.47    0.43 
  -3 -14  10    0.06    0.39 
   2  14 -10   -0.33    0.45 
   1  14 -10    0.24    0.46 
   0  14 -10   -0.05    0.42 
  -1  14 -10   -0.05    0.35 
  -2  14 -10    0.50    0.44 
  -3  14 -10    0.25    0.45 
  -3  14 -10   -0.08    0.35 
  -4  14 -10    0.99    0.54 
  -5  14 -10    0.54    0.48 
  -6  14 -10   -0.14    0.51 
   5  13 -10    0.87    0.69 
  -5 -13  10    0.83    0.57 
   4  13 -10    0.71    0.59 
  -4 -13  10    0.87    0.50 
   3  13 -10   -0.49    0.35 
  -3 -13  10    0.28    0.37 
   2  13 -10    0.63    0.51 
  -2 -13  10    0.58    0.46 
   1  13 -10   -0.16    0.33 
   0  13 -10   -0.22    0.37 
  -1  13 -10    0.59    0.48 
  -2  13 -10   -0.11    0.38 
  -2  13 -10   -0.07    0.31 
  -3  13 -10    0.37    0.41 
  -4  13 -10   -0.15    0.39 
  -5  13 -10    0.53    0.48 
  -6  13 -10    0.03    0.49 
  -6 -12  10    0.05    0.56 
   5  12 -10    0.16    0.59 
  -5 -12  10    0.20    0.46 
   4  12 -10    0.00    0.46 
  -4 -12  10   -0.08    0.36 
   3  12 -10    0.21    0.40 
  -3 -12  10    0.91    0.41 
   2  12 -10    0.23    0.34 
  -2 -12  10   -0.27    0.34 
   1  12 -10    0.12    0.29 
  -1 -12  10   -0.16    0.33 
   0  12 -10    0.32    0.36 
  -1  12 -10    0.36    0.36 
  -2  12 -10    0.36    0.42 
  -3  12 -10    1.10    0.48 
  -4  12 -10   -0.24    0.38 
  -5  12 -10    0.20    0.48 
  -6  12 -10    0.44    0.49 
  -7  12 -10    0.13    0.51 
  -6 -11  10   -0.13    0.48 
   5  11 -10    0.88    0.59 
  -5 -11  10    0.47    0.47 
   4  11 -10    0.33    0.49 
  -4 -11  10    0.49    0.38 
   3  11 -10    1.18    0.50 
  -3 -11  10    1.09    0.46 
   2  11 -10   -0.20    0.27 
  -2 -11  10    0.26    0.35 
   1  11 -10    0.56    0.34 
  -1 -11  10    1.08    0.38 
   0  11 -10    0.68    0.38 
  -1  11 -10    4.49    0.73 
  -2  11 -10    8.02    0.97 
  -3  11 -10    0.50    0.37 
  -4  11 -10    0.47    0.42 
  -5  11 -10   -0.09    0.37 
  -6  11 -10   -0.16    0.44 
  -7  11 -10   -0.02    0.50 
  -6 -10  10    0.49    0.51 
   5  10 -10    0.25    0.50 
  -5 -10  10    0.15    0.41 
   4  10 -10    1.54    0.59 
  -4 -10  10    0.93    0.45 
   3  10 -10    0.87    0.41 
   2  10 -10    0.76    0.40 
   2  10 -10    0.24    0.43 
   1  10 -10    1.99    0.48 
   1  10 -10    1.81    0.49 
   0  10 -10    1.98    0.45 
   0  10 -10    2.09    0.51 
  -1  10 -10   17.51    1.39 
  -2  10 -10   -0.21    0.30 
  -3  10 -10    1.49    0.49 
  -4  10 -10    1.49    0.52 
  -5  10 -10    0.16    0.42 
  -6  10 -10    0.23    0.49 
  -7  10 -10   -0.02    0.52 
  -7  -9  10    0.20    0.55 
  -6  -9  10    0.29    0.41 
   5   9 -10    0.77    0.53 
  -5  -9  10    0.60    0.38 
   4   9 -10    0.83    0.45 
   4   9 -10    0.26    0.50 
   3   9 -10    1.55    0.51 
   3   9 -10    0.93    0.53 
   2   9 -10    2.03    0.58 
   2   9 -10    1.62    0.48 
   1   9 -10    2.83    0.58 
   1   9 -10    3.36    0.60 
   0   9 -10    5.94    0.76 
   0   9 -10    7.80    0.80 
  -1   9 -10   10.43    1.02 
  -2   9 -10   11.40    1.09 
  -3   9 -10    1.03    0.42 
  -4   9 -10    1.82    0.52 
  -5   9 -10   -0.10    0.36 
  -6   9 -10    0.40    0.47 
  -7   9 -10    0.27    0.54 
  -7  -8  10    0.08    0.54 
  -6  -8  10    0.74    0.46 
   5   8 -10    0.09    0.55 
   5   8 -10    0.15    0.43 
   4   8 -10    1.98    0.57 
   4   8 -10    0.80    0.51 
   3   8 -10    0.42    0.38 
   3   8 -10   -0.54    0.34 
   2   8 -10    1.17    0.42 
   2   8 -10    1.49    0.51 
   1   8 -10   16.73    1.33 
   1   8 -10   17.99    1.33 
   0   8 -10    4.64    0.68 
   0   8 -10    6.69    0.70 
  -1   8 -10   29.18    1.84 
  -2   8 -10    1.55    0.41 
  -3   8 -10    1.15    0.43 
  -4   8 -10    1.22    0.47 
  -5   8 -10    0.59    0.42 
  -6   8 -10    1.06    0.54 
  -7   8 -10    0.99    0.64 
  -7  -7  10    0.56    0.53 
   6   7 -10    0.01    0.60 
   5   7 -10    0.18    0.45 
   5   7 -10    0.07    0.46 
   4   7 -10    0.18    0.40 
   4   7 -10    0.31    0.43 
   3   7 -10    1.97    0.53 
   3   7 -10    2.07    0.57 
   2   7 -10    3.82    0.65 
   2   7 -10    3.78    0.64 
   1   7 -10    0.21    0.26 
   1   7 -10   -0.03    0.23 
   0   7 -10    9.21    0.90 
   0   7 -10   10.85    0.87 
  -1   7 -10    8.01    0.67 
  -1   7 -10    7.14    0.77 
  -2   7 -10    0.24    0.27 
  -3   7 -10    5.81    0.75 
  -4   7 -10    1.91    0.53 
  -5   7 -10    1.43    0.50 
  -6   7 -10   -0.30    0.44 
  -7   7 -10   -0.68    0.49 
  -8  -6  10    0.07    0.54 
   7   6 -10   -0.30    0.65 
   6   6 -10    0.14    0.56 
   5   6 -10    0.49    0.57 
   5   6 -10    1.31    0.61 
   4   6 -10    0.54    0.49 
   4   6 -10   -0.33    0.31 
   3   6 -10    0.27    0.34 
   3   6 -10    0.29    0.42 
   2   6 -10    0.34    0.29 
   2   6 -10    0.50    0.33 
   1   6 -10   12.33    1.02 
   1   6 -10   14.75    1.12 
   0   6 -10    0.19    0.22 
   0   6 -10    0.27    0.20 
  -1   6 -10    4.20    0.49 
  -1   6 -10    3.01    0.51 
  -2   6 -10    0.77    0.30 
  -3   6 -10    0.42    0.28 
  -4   6 -10    0.38    0.31 
  -5   6 -10    3.11    0.69 
  -6   6 -10    0.59    0.47 
  -7   6 -10    0.13    0.55 
  -8  -5  10   -0.09    0.54 
   7   5 -10    0.45    0.62 
   6   5 -10    0.08    0.56 
   5   5 -10   -0.34    0.40 
   5   5 -10    0.14    0.44 
   4   5 -10    0.26    0.41 
   4   5 -10    1.22    0.48 
   3   5 -10    3.16    0.61 
   3   5 -10    2.13    0.57 
   2   5 -10    3.78    0.59 
   2   5 -10    4.35    0.67 
   1   5 -10    8.98    0.78 
   1   5 -10    9.47    0.92 
   0   5 -10    4.10    0.57 
   0   5 -10    5.70    0.60 
  -1   5 -10    4.05    0.50 
  -1   5 -10    3.91    0.54 
  -2   5 -10    0.79    0.33 
  -2   5 -10    0.99    0.26 
  -3   5 -10    0.56    0.30 
  -4   5 -10    3.24    0.62 
  -5   5 -10    6.33    0.88 
  -6   5 -10    0.38    0.47 
  -7   5 -10    0.06    0.48 
  -8   5 -10   -0.13    0.52 
   8   4 -10    0.74    0.78 
   7   4 -10   -0.60    0.47 
   6   4 -10    0.17    0.43 
   5   4 -10    1.00    0.53 
   5   4 -10    1.60    0.59 
   4   4 -10   -0.26    0.33 
   4   4 -10    0.34    0.36 
   3   4 -10    5.84    0.77 
   3   4 -10    7.37    0.95 
   2   4 -10    1.27    0.38 
   2   4 -10    1.32    0.34 
   1   4 -10    0.82    0.25 
   1   4 -10    0.87    0.31 
   0   4 -10   28.83    1.91 
   0   4 -10   29.91    1.83 
  -1   4 -10    2.80    0.45 
  -1   4 -10    3.41    0.48 
  -2   4 -10    0.48    0.21 
  -2   4 -10   -0.31    0.21 
  -3   4 -10   10.86    0.82 
  -3   4 -10    9.65    0.97 
  -4   4 -10    4.09    0.66 
  -5   4 -10    1.14    0.41 
  -6   4 -10    1.16    0.53 
  -7   4 -10    0.44    0.54 
  -8   4 -10    0.05    0.55 
   8   3 -10    1.56    0.86 
   7   3 -10    0.33    0.54 
   6   3 -10    1.23    0.59 
   5   3 -10   -0.11    0.36 
   5   3 -10   -0.02    0.37 
   4   3 -10    1.34    0.44 
   4   3 -10    0.56    0.46 
   3   3 -10    0.13    0.32 
   3   3 -10    0.09    0.25 
   2   3 -10    1.37    0.36 
   2   3 -10    1.64    0.42 
   1   3 -10    0.07    0.17 
   1   3 -10    0.45    0.26 
   0   3 -10    2.86    0.48 
   0   3 -10    1.58    0.31 
  -1   3 -10   -0.03    0.16 
  -1   3 -10   -0.20    0.16 
  -2   3 -10    0.00    0.20 
  -2   3 -10    0.30    0.20 
  -3   3 -10    0.85    0.28 
  -3   3 -10    0.55    0.30 
  -4   3 -10   10.11    1.01 
  -5   3 -10    0.48    0.36 
  -6   3 -10   -0.03    0.34 
  -7   3 -10    0.08    0.55 
  -8   3 -10   -0.11    0.51 
   8   2 -10    0.01    0.65 
   7   2 -10    0.27    0.48 
   6   2 -10    0.79    0.50 
   5   2 -10    0.40    0.45 
   4   2 -10    2.85    0.57 
   4   2 -10    1.50    0.56 
   3   2 -10    1.12    0.34 
   3   2 -10    0.60    0.41 
   2   2 -10   -0.01    0.24 
   2   2 -10   -0.11    0.17 
   1   2 -10    0.41    0.20 
   1   2 -10    0.53    0.26 
   0   2 -10    6.92    0.75 
   0   2 -10    6.71    0.58 
  -1   2 -10   -0.01    0.19 
  -1   2 -10    0.00    0.16 
  -2   2 -10    2.02    0.41 
  -2   2 -10    2.17    0.40 
  -3   2 -10    2.23    0.45 
  -3   2 -10    3.14    0.45 
  -4   2 -10    3.01    0.47 
  -4   2 -10    2.45    0.56 
  -5   2 -10    0.16    0.30 
  -6   2 -10    0.35    0.39 
  -7   2 -10   -0.31    0.41 
   8   1 -10    0.34    0.65 
   7   1 -10    0.19    0.53 
   6   1 -10    0.02    0.39 
   5   1 -10   -0.11    0.35 
   4   1 -10    0.85    0.45 
   4   1 -10    0.64    0.34 
   3   1 -10    0.42    0.38 
   3   1 -10    0.51    0.25 
   2   1 -10    2.21    0.39 
   2   1 -10    1.30    0.40 
   1   1 -10   11.04    0.93 
   1   1 -10    9.10    0.72 
   0   1 -10    1.39    0.36 
   0   1 -10    2.26    0.34 
  -1   1 -10    7.89    0.68 
  -1   1 -10    8.69    0.75 
  -2   1 -10    9.40    0.84 
  -2   1 -10   11.36    0.86 
  -3   1 -10    0.66    0.31 
  -3   1 -10    0.39    0.25 
  -4   1 -10    0.36    0.27 
  -4   1 -10   -0.31    0.21 
  -5   1 -10    1.00    0.43 
  -6   1 -10   -0.04    0.37 
  -7   1 -10    0.12    0.51 
   8   0 -10    0.10    0.58 
   7   0 -10    0.32    0.43 
   6   0 -10    0.55    0.48 
   5   0 -10    0.82    0.47 
   4   0 -10   -0.13    0.25 
   4   0 -10   -0.07    0.31 
   3   0 -10    2.31    0.42 
   3   0 -10    1.05    0.47 
   2   0 -10   10.68    1.07 
   2   0 -10   10.11    0.78 
   1   0 -10    1.58    0.41 
   0   0 -10   -0.01    0.13 
   0   0 -10    0.01    0.17 
  -1   0 -10    4.77    0.54 
  -1   0 -10    5.11    0.62 
  -2   0 -10    0.46    0.24 
  -2   0 -10    0.45    0.26 
  -3   0 -10    1.93    0.43 
  -3   0 -10    1.86    0.42 
  -4   0 -10    3.49    0.58 
  -4   0 -10    2.64    0.56 
  -5   0 -10    0.32    0.40 
  -5   0 -10   -0.30    0.27 
  -6   0 -10    0.35    0.44 
  -7   0 -10    0.39    0.52 
   8  -1 -10   -0.06    0.64 
   7  -1 -10    1.03    0.56 
   6  -1 -10    0.10    0.39 
   5  -1 -10    1.53    0.56 
   4  -1 -10    0.86    0.39 
   4  -1 -10    0.81    0.31 
  -4   1  10    0.80    0.28 
   3  -1 -10   26.48    1.95 
   3  -1 -10   25.87    1.64 
  -3   1  10   26.17    1.66 
   2  -1 -10    1.37    0.38 
   2  -1 -10    1.42    0.29 
   1  -1 -10   26.86    1.71 
   1  -1 -10   22.38    1.42 
   0  -1 -10    1.87    0.40 
   0  -1 -10    1.43    0.27 
  -1  -1 -10   25.46    1.65 
  -1  -1 -10   27.74    1.77 
  -2  -1 -10    3.41    0.51 
  -2  -1 -10    2.81    0.48 
  -3  -1 -10    0.92    0.36 
  -3  -1 -10    0.37    0.32 
  -4  -1 -10   30.90    2.01 
  -4  -1 -10   27.23    1.98 
  -5  -1 -10    0.75    0.41 
  -5  -1 -10    0.90    0.51 
  -6  -1 -10    0.86    0.50 
  -7  -1 -10    0.86    0.61 
   8  -2 -10    0.87    0.61 
   7  -2 -10    1.94    0.67 
   6  -2 -10    0.05    0.32 
   5  -2 -10   -0.30    0.31 
  -5   2  10   -0.30    0.22 
   4  -2 -10    0.43    0.36 
  -4   2  10   -0.15    0.19 
   3  -2 -10    3.48    0.70 
   3  -2 -10    5.29    0.51 
  -3   2  10    5.62    0.61 
   2  -2 -10    1.69    0.43 
   2  -2 -10    1.21    0.26 
   1  -2 -10    3.57    0.36 
   1  -2 -10    4.08    0.62 
   0  -2 -10    0.36    0.15 
   0  -2 -10    0.48    0.27 
  -1  -2 -10    1.00    0.26 
  -1  -2 -10    1.15    0.34 
  -2  -2 -10    0.16    0.23 
  -2  -2 -10    0.06    0.22 
  -3  -2 -10   19.82    1.46 
  -3  -2 -10   18.22    1.37 
  -4  -2 -10    1.02    0.46 
  -4  -2 -10    0.20    0.35 
  -5  -2 -10   -0.13    0.40 
  -5  -2 -10   -0.18    0.36 
  -6  -2 -10    0.55    0.55 
  -6  -2 -10    0.16    0.45 
  -7  -2 -10    0.00    0.59 
   8  -3 -10   -0.85    0.49 
   7  -3 -10    0.79    0.53 
   6  -3 -10    0.99    0.54 
   5  -3 -10   -0.19    0.35 
  -5   3  10    0.27    0.23 
   4  -3 -10   -0.52    0.26 
  -4   3  10    0.41    0.26 
   3  -3 -10    6.54    0.90 
  -3   3  10    6.16    0.68 
   2  -3 -10    1.11    0.36 
   2  -3 -10    0.79    0.21 
   1  -3 -10    0.85    0.30 
   1  -3 -10    1.15    0.22 
   0  -3 -10    6.79    0.53 
   0  -3 -10    5.39    0.70 
  -1  -3 -10   -0.08    0.20 
  -1  -3 -10   -0.20    0.18 
  -2  -3 -10   20.89    1.59 
  -2  -3 -10   24.59    1.54 
  -3  -3 -10    2.56    0.53 
  -3  -3 -10    2.51    0.57 
  -4  -3 -10    0.17    0.43 
  -4  -3 -10    0.03    0.31 
  -5  -3 -10   -0.08    0.43 
  -5  -3 -10    0.28    0.41 
  -6  -3 -10    0.07    0.44 
  -6  -3 -10    0.31    0.55 
  -7  -3 -10   -0.48    0.53 
   8  -4 -10    0.33    0.56 
   7  -4 -10    0.24    0.47 
   6  -4 -10    0.95    0.50 
   5  -4 -10    0.19    0.38 
  -5   4  10    0.72    0.27 
   4  -4 -10    5.89    0.89 
  -4   4  10    5.67    0.67 
   3  -4 -10    0.14    0.27 
  -3   4  10    0.00    0.22 
   2  -4 -10    1.57    0.45 
  -2   4  10    3.89    0.57 
   1  -4 -10   -0.01    0.12 
   1  -4 -10   -0.09    0.22 
   0  -4 -10    7.01    0.81 
   0  -4 -10    8.30    0.62 
  -1  -4 -10   26.53    1.83 
  -1  -4 -10   26.05    1.63 
  -2  -4 -10    0.02    0.32 
  -2  -4 -10    0.43    0.23 
  -3  -4 -10   15.22    1.28 
  -3  -4 -10   12.97    1.11 
  -4  -4 -10    0.14    0.32 
  -4  -4 -10    0.15    0.46 
  -5  -4 -10    1.00    0.45 
  -5  -4 -10    0.50    0.53 
  -6  -4 -10    0.44    0.63 
  -6  -4 -10    0.73    0.59 
  -7  -4 -10    0.04    0.60 
   8  -5 -10    0.12    0.59 
   7  -5 -10    0.29    0.41 
   6  -5 -10    0.25    0.45 
  -6   5  10    0.16    0.33 
   5  -5 -10    0.07    0.39 
  -5   5  10    0.29    0.35 
   4  -5 -10    0.42    0.37 
   3  -5 -10    2.92    0.60 
  -3   5  10    2.94    0.52 
   2  -5 -10    9.79    1.03 
  -2   5  10   11.09    0.94 
   1  -5 -10    0.17    0.14 
   1  -5 -10   -0.36    0.23 
   0  -5 -10    5.83    0.48 
   0  -5 -10    4.57    0.69 
  -1  -5 -10    7.47    0.87 
  -2  -5 -10    1.32    0.34 
  -2  -5 -10    2.27    0.55 
  -3  -5 -10    1.21    0.40 
  -3  -5 -10    1.44    0.55 
  -4  -5 -10    1.94    0.67 
  -4  -5 -10    1.79    0.52 
  -5  -5 -10   -0.15    0.39 
  -5  -5 -10    0.19    0.52 
  -6  -5 -10    1.05    0.67 
  -6  -5 -10    1.06    0.60 
  -7  -5 -10    0.80    0.71 
  -7  -5 -10    0.33    0.74 
   8  -6 -10    0.27    0.58 
   7  -6 -10    0.80    0.60 
   6  -6 -10    0.08    0.43 
  -6   6  10   -0.06    0.31 
   5  -6 -10    0.05    0.36 
  -5   6  10    0.98    0.39 
   4  -6 -10    0.23    0.32 
  -4   6  10   -0.02    0.27 
   3  -6 -10    1.01    0.40 
  -3   6  10    0.84    0.38 
   2  -6 -10    0.16    0.25 
  -2   6  10    0.23    0.28 
   1  -6 -10    0.87    0.35 
   0  -6 -10   10.12    1.07 
   0  -6 -10   13.31    0.86 
  -1  -6 -10    0.28    0.20 
  -1  -6 -10    0.62    0.38 
  -2  -6 -10    1.22    0.48 
  -2  -6 -10    1.84    0.41 
  -3  -6 -10    0.13    0.39 
  -3  -6 -10   -0.05    0.31 
  -4  -6 -10   -0.06    0.34 
  -4  -6 -10    0.16    0.46 
  -5  -6 -10   -0.35    0.38 
  -5  -6 -10   -0.18    0.55 
  -6  -6 -10    0.08    0.61 
  -6  -6 -10   -0.17    0.47 
   8  -7 -10    1.78    0.74 
   7  -7 -10    0.32    0.50 
  -7   7  10    0.30    0.40 
   6  -7 -10   -0.04    0.38 
  -6   7  10    0.16    0.41 
   5  -7 -10    0.31    0.32 
  -5   7  10   -0.05    0.30 
   4  -7 -10    0.61    0.36 
  -4   7  10    0.63    0.36 
   3  -7 -10   -0.05    0.25 
  -3   7  10   -0.07    0.29 
   2  -7 -10    0.00    0.24 
  -2   7  10    0.24    0.31 
   1  -7 -10    0.30    0.27 
   0  -7 -10    0.77    0.39 
  -1  -7 -10    0.11    0.21 
  -1  -7 -10    0.13    0.33 
  -2  -7 -10    0.21    0.26 
  -2  -7 -10    0.11    0.39 
  -3  -7 -10    1.35    0.45 
  -3  -7 -10    0.85    0.47 
  -4  -7 -10    0.21    0.39 
  -4  -7 -10    0.33    0.54 
  -5  -7 -10   -0.19    0.55 
  -5  -7 -10    0.89    0.50 
  -6  -7 -10   -0.25    0.56 
  -6  -7 -10    0.27    0.68 
   8  -8 -10    0.22    0.59 
   7  -8 -10    0.10    0.48 
  -7   8  10    0.11    0.40 
   6  -8 -10    0.36    0.49 
  -6   8  10    0.47    0.42 
   5  -8 -10    0.50    0.40 
  -5   8  10    0.31    0.38 
   4  -8 -10    0.27    0.31 
  -4   8  10    0.39    0.35 
   3  -8 -10    2.56    0.59 
  -3   8  10    1.96    0.51 
   2  -8 -10    1.23    0.41 
  -2   8  10    0.91    0.43 
   1  -8 -10    1.31    0.39 
   0  -8 -10    0.10    0.31 
  -1  -8 -10    0.29    0.40 
  -1  -8 -10    0.16    0.24 
  -2  -8 -10    0.52    0.47 
  -2  -8 -10    1.26    0.40 
  -3  -8 -10    0.95    0.56 
  -4  -8 -10    0.49    0.57 
  -5  -8 -10    0.19    0.66 
  -5  -8 -10   -0.20    0.47 
  -6  -8 -10    0.28    0.71 
  -6  -8 -10    0.30    0.60 
   8  -9 -10    0.83    0.88 
   7  -9 -10    0.04    0.56 
  -7   9  10   -0.10    0.43 
   6  -9 -10    0.15    0.46 
  -6   9  10   -0.07    0.37 
   5  -9 -10    0.82    0.50 
  -5   9  10    0.96    0.43 
   4  -9 -10    0.63    0.43 
  -4   9  10    0.40    0.40 
   3  -9 -10    0.65    0.36 
  -3   9  10    0.56    0.39 
   2  -9 -10    2.18    0.52 
  -2   9  10    3.19    0.63 
   1  -9 -10    2.40    0.54 
   0  -9 -10    0.20    0.30 
  -1  -9 -10    1.17    0.49 
  -2  -9 -10   -0.29    0.43 
  -3  -9 -10   -0.16    0.48 
  -4  -9 -10    0.19    0.56 
  -5  -9 -10   -0.28    0.64 
  -8  10  10    0.41    0.56 
   7 -10 -10   -0.28    0.58 
  -7  10  10   -0.38    0.41 
   6 -10 -10   -0.19    0.45 
  -6  10  10   -0.50    0.37 
   5 -10 -10    0.81    0.47 
  -5  10  10   -0.04    0.37 
   4 -10 -10    1.28    0.48 
  -4  10  10    0.74    0.40 
   3 -10 -10    0.36    0.30 
  -3  10  10    0.62    0.41 
   2 -10 -10    0.00    0.30 
  -2  10  10   -0.02    0.30 
   1 -10 -10    1.69    0.47 
   0 -10 -10    2.08    0.55 
  -1 -10 -10    3.26    0.69 
  -2 -10 -10    1.17    0.61 
  -3 -10 -10    0.12    0.56 
  -4 -10 -10    0.55    0.67 
  -5 -10 -10    0.08    0.68 
   7 -11 -10    0.91    0.73 
  -7  11  10    0.11    0.52 
   6 -11 -10   -0.42    0.45 
  -6  11  10    0.31    0.47 
   5 -11 -10    1.06    0.50 
  -5  11  10    0.17    0.42 
   4 -11 -10    0.85    0.44 
  -4  11  10    0.28    0.37 
   3 -11 -10    1.10    0.46 
  -3  11  10    0.82    0.46 
   2 -11 -10   -0.04    0.29 
  -2  11  10    0.16    0.37 
   1 -11 -10    1.18    0.42 
   0 -11 -10    0.06    0.30 
  -1 -11 -10   -0.30    0.31 
  -2 -11 -10    0.21    0.55 
  -3 -11 -10    0.17    0.63 
  -4 -11 -10    0.89    0.71 
  -5 -11 -10    0.58    0.70 
  -7  12  10    0.10    0.51 
   6 -12 -10    1.67    0.63 
  -6  12  10    0.72    0.53 
   5 -12 -10   -0.13    0.41 
  -5  12  10    0.07    0.38 
   4 -12 -10    0.47    0.43 
  -4  12  10    0.17    0.35 
   3 -12 -10    0.40    0.31 
  -3  12  10   -0.21    0.36 
   2 -12 -10    0.77    0.42 
  -2  12  10    0.72    0.48 
   1 -12 -10   -0.10    0.26 
   0 -12 -10    0.00    0.32 
  -1 -12 -10    0.61    0.44 
  -2 -12 -10    0.19    0.46 
  -3 -12 -10    0.36    0.70 
  -4 -12 -10    0.25    0.71 
  -7  13  10    0.08    0.56 
   6 -13 -10   -0.18    0.55 
  -6  13  10    0.18    0.46 
   5 -13 -10    0.06    0.46 
  -5  13  10    0.08    0.52 
   4 -13 -10    0.56    0.46 
  -4  13  10   -0.30    0.37 
   3 -13 -10    0.29    0.40 
  -3  13  10    0.63    0.50 
   2 -13 -10    1.66    0.49 
  -2  13  10    1.99    0.65 
   1 -13 -10    0.21    0.32 
   0 -13 -10    0.92    0.45 
  -1 -13 -10    0.39    0.38 
  -2 -13 -10    0.33    0.45 
  -3 -13 -10    0.67    0.68 
  -4 -13 -10    1.37    0.83 
  -6  14  10    0.06    0.48 
   5 -14 -10    0.82    0.59 
  -5  14  10   -0.03    0.50 
   4 -14 -10    0.80    0.51 
  -4  14  10    0.00    0.48 
   3 -14 -10    0.14    0.40 
  -3  14  10   -0.31    0.44 
   2 -14 -10    0.28    0.34 
  -2  14  10    0.20    0.50 
   1 -14 -10    0.11    0.35 
   0 -14 -10    0.04    0.37 
  -1 -14 -10    0.45    0.47 
  -2 -14 -10    0.87    0.59 
  -3 -14 -10    0.75    0.67 
  -6  15  10    0.48    0.50 
   5 -15 -10    0.02    0.62 
  -5  15  10    0.59    0.54 
   4 -15 -10    0.23    0.47 
  -4  15  10   -0.04    0.48 
   3 -15 -10    0.32    0.47 
  -3  15  10    0.32    0.52 
   2 -15 -10    0.24    0.41 
  -2  15  10    0.21    0.44 
   1 -15 -10    0.06    0.39 
   0 -15 -10   -0.27    0.32 
  -1 -15 -10    0.63    0.51 
  -2 -15 -10    0.25    0.54 
  -5  16  10    0.06    0.47 
   4 -16 -10    1.39    0.65 
  -4  16  10   -0.22    0.57 
   3 -16 -10   -0.41    0.42 
  -3  16  10   -0.66    0.46 
   2 -16 -10   -0.15    0.43 
  -2  16  10    0.69    0.54 
   1 -16 -10    0.07    0.42 
   0 -16 -10    0.08    0.44 
  -1 -16 -10    0.38    0.57 
   4 -17 -10    0.88    0.77 
  -4  17  10    0.05    0.56 
   3 -17 -10   -0.11    0.48 
  -3  17  10    0.19    0.59 
   2 -17 -10    0.55    0.51 
  -2  17  10   -0.42    0.48 
   1 -17 -10   -0.31    0.43 
   0 -17 -10    0.22    0.64 
  -3  18  10    0.28    0.69 
   2 -18 -10    0.26    0.56 
  -2  18  10    0.49    0.73 
   1  18 -11    0.28    0.56 
   0  18 -11   -0.58    0.46 
  -1  18 -11    0.36    0.65 
  -2  18 -11    1.64    0.78 
  -3  18 -11    0.32    0.60 
   2  17 -11    0.27    0.60 
   1  17 -11   -0.38    0.49 
   0  17 -11    0.63    0.62 
  -1  17 -11    0.45    0.65 
  -2  17 -11    0.52    0.65 
  -3  17 -11   -0.25    0.57 
  -4  17 -11   -0.12    0.54 
   3  16 -11   -0.40    0.56 
   2  16 -11   -0.13    0.54 
   1  16 -11    0.57    0.57 
   0  16 -11    0.57    0.56 
  -1  16 -11   -0.38    0.45 
  -2  16 -11   -0.14    0.45 
  -3  16 -11    0.07    0.58 
  -4  16 -11   -0.50    0.53 
  -4  16 -11    0.02    0.50 
  -5  16 -11    0.77    0.56 
  -5  16 -11    0.10    0.53 
   4  15 -11    0.35    0.69 
  -4 -15  11   -0.07    0.55 
   3  15 -11    0.44    0.54 
   2  15 -11   -0.20    0.49 
   1  15 -11   -0.04    0.40 
   0  15 -11    0.12    0.46 
  -1  15 -11    0.17    0.47 
  -2  15 -11   -0.16    0.49 
  -3  15 -11    0.06    0.45 
  -4  15 -11    0.69    0.47 
  -4  15 -11    0.02    0.56 
  -5  15 -11    0.07    0.52 
   4  14 -11   -0.05    0.58 
  -4 -14  11    0.21    0.52 
   3  14 -11   -0.33    0.44 
  -3 -14  11   -0.38    0.42 
   2  14 -11    0.45    0.40 
   1  14 -11    0.32    0.46 
   0  14 -11    0.03    0.42 
  -1  14 -11    0.39    0.46 
  -2  14 -11   -0.12    0.43 
  -3  14 -11    0.23    0.49 
  -4  14 -11    0.20    0.45 
  -5  14 -11    0.06    0.45 
  -6  14 -11    0.20    0.47 
   5  13 -11    0.57    0.69 
  -5 -13  11   -0.10    0.51 
   4  13 -11   -0.82    0.45 
  -4 -13  11   -0.24    0.43 
   3  13 -11    0.41    0.41 
  -3 -13  11   -0.21    0.31 
   2  13 -11    0.65    0.40 
  -2 -13  11    0.96    0.51 
   1  13 -11    0.23    0.41 
   0  13 -11   -0.14    0.39 
  -1  13 -11   -0.09    0.36 
  -2  13 -11    0.37    0.44 
  -3  13 -11    0.40    0.48 
  -4  13 -11   -0.33    0.41 
  -5  13 -11    1.11    0.55 
  -6  13 -11    0.38    0.53 
   5  12 -11   -0.07    0.58 
  -5 -12  11    0.28    0.47 
   4  12 -11    0.34    0.51 
  -4 -12  11    0.35    0.41 
   3  12 -11    0.34    0.37 
  -3 -12  11    0.19    0.38 
   2  12 -11    0.38    0.36 
  -2 -12  11    1.17    0.46 
   1  12 -11    0.07    0.33 
   0  12 -11    0.17    0.31 
  -1  12 -11    1.55    0.52 
  -2  12 -11    0.38    0.45 
  -3  12 -11    0.82    0.49 
  -4  12 -11    0.00    0.44 
  -5  12 -11    0.08    0.44 
  -6  12 -11    0.08    0.50 
  -6 -11  11    0.02    0.58 
   5  11 -11    0.73    0.65 
  -5 -11  11    0.47    0.48 
   4  11 -11    0.58    0.50 
  -4 -11  11    0.50    0.45 
   3  11 -11   -0.14    0.36 
  -3 -11  11    0.39    0.34 
   2  11 -11   -0.04    0.29 
  -2 -11  11   -0.13    0.30 
   1  11 -11    0.45    0.31 
  -1 -11  11    0.16    0.31 
   0  11 -11    0.30    0.28 
  -1  11 -11    0.29    0.29 
  -2  11 -11    0.91    0.43 
  -3  11 -11    0.47    0.38 
  -4  11 -11   -0.19    0.36 
  -5  11 -11   -0.69    0.39 
  -6  11 -11    0.13    0.49 
  -6 -10  11    0.04    0.48 
   5  10 -11    0.20    0.51 
  -5 -10  11    0.21    0.42 
   4  10 -11    0.50    0.43 
  -4 -10  11    0.27    0.36 
   3  10 -11    0.47    0.47 
   3  10 -11    0.35    0.40 
   2  10 -11   -0.04    0.25 
   2  10 -11    0.41    0.48 
   1  10 -11    1.37    0.45 
   1  10 -11    2.01    0.49 
   0  10 -11    1.25    0.42 
  -1  10 -11    8.90    1.00 
  -2  10 -11    0.88    0.43 
  -3  10 -11    0.40    0.42 
  -4  10 -11    0.11    0.38 
  -5  10 -11   -0.48    0.38 
  -6  10 -11   -0.32    0.44 
  -7  10 -11    0.37    0.54 
  -7  -9  11    0.39    0.55 
  -6  -9  11    1.12    0.59 
   5   9 -11   -0.18    0.54 
   5   9 -11    0.81    0.62 
   4   9 -11    0.28    0.52 
   4   9 -11   -0.05    0.42 
   3   9 -11   -0.18    0.42 
   3   9 -11    0.11    0.34 
   2   9 -11    0.07    0.38 
   2   9 -11    0.17    0.31 
   1   9 -11    3.81    0.65 
   1   9 -11    3.17    0.62 
   0   9 -11   18.65    1.44 
   0   9 -11   21.56    1.50 
  -1   9 -11    5.78    0.77 
  -2   9 -11    3.02    0.57 
  -3   9 -11    0.58    0.40 
  -4   9 -11    2.03    0.57 
  -5   9 -11    0.52    0.45 
  -6   9 -11    0.03    0.46 
  -7   9 -11    0.36    0.50 
  -7  -8  11   -0.32    0.53 
   6   8 -11    0.06    0.72 
   5   8 -11   -0.12    0.54 
   5   8 -11    0.27    0.52 
   4   8 -11    0.45    0.48 
   4   8 -11    0.59    0.45 
   3   8 -11    0.87    0.46 
   3   8 -11   -0.08    0.43 
   2   8 -11   -0.15    0.24 
   2   8 -11    0.13    0.35 
   1   8 -11   22.25    1.62 
   1   8 -11   21.94    1.60 
   0   8 -11    1.87    0.41 
   0   8 -11    1.48    0.40 
  -1   8 -11    1.25    0.40 
  -2   8 -11    0.16    0.28 
  -3   8 -11    2.07    0.49 
  -4   8 -11    1.98    0.52 
  -5   8 -11    0.12    0.43 
  -6   8 -11    1.02    0.56 
  -7   8 -11    0.08    0.50 
  -7  -7  11    0.07    0.51 
   6   7 -11    0.73    0.73 
   5   7 -11    0.46    0.51 
   5   7 -11    0.45    0.56 
   4   7 -11    1.62    0.57 
   4   7 -11    0.70    0.51 
   3   7 -11    3.34    0.74 
   3   7 -11    3.40    0.66 
   2   7 -11    6.09    0.82 
   2   7 -11    7.27    0.95 
   1   7 -11    6.15    0.80 
   1   7 -11    5.99    0.75 
   0   7 -11   16.98    1.24 
   0   7 -11   15.35    1.19 
  -1   7 -11    2.71    0.42 
  -1   7 -11    2.22    0.47 
  -2   7 -11    2.82    0.54 
  -3   7 -11    1.45    0.42 
  -4   7 -11    0.67    0.33 
  -5   7 -11    0.75    0.45 
  -6   7 -11   -0.04    0.49 
  -7   7 -11    0.40    0.62 
   7   6 -11   -0.58    0.65 
   6   6 -11   -0.47    0.56 
   5   6 -11    1.09    0.59 
   5   6 -11    1.21    0.63 
   4   6 -11   -0.34    0.34 
   4   6 -11    0.10    0.42 
   3   6 -11    4.22    0.80 
   3   6 -11    3.78    0.70 
   2   6 -11    0.50    0.40 
   2   6 -11    0.38    0.31 
   1   6 -11   15.27    1.18 
   1   6 -11   13.63    1.11 
   0   6 -11    5.57    0.68 
   0   6 -11    6.12    0.70 
  -1   6 -11    3.95    0.51 
  -1   6 -11    3.07    0.53 
  -2   6 -11    0.19    0.28 
  -3   6 -11    0.38    0.32 
  -4   6 -11    1.30    0.40 
  -5   6 -11    0.71    0.40 
  -6   6 -11    0.10    0.53 
  -7   6 -11    0.05    0.56 
   8   5 -11    1.42    0.96 
   7   5 -11    0.43    0.58 
   6   5 -11    0.81    0.66 
   5   5 -11    0.06    0.49 
   5   5 -11    0.80    0.55 
   4   5 -11   -0.09    0.40 
   4   5 -11    0.52    0.46 
   3   5 -11    4.13    0.78 
   3   5 -11    4.87    0.74 
   2   5 -11    0.86    0.34 
   2   5 -11    0.85    0.38 
   1   5 -11    1.86    0.40 
   1   5 -11    2.16    0.46 
   0   5 -11    2.03    0.39 
   0   5 -11    2.38    0.44 
  -1   5 -11   11.67    0.96 
  -1   5 -11   12.03    0.94 
  -2   5 -11    1.59    0.34 
  -2   5 -11    1.12    0.36 
  -3   5 -11    1.06    0.40 
  -4   5 -11   -0.14    0.28 
  -5   5 -11    1.47    0.49 
  -6   5 -11    0.65    0.48 
  -7   5 -11    0.07    0.60 
   8   4 -11    1.42    0.89 
   7   4 -11   -0.02    0.48 
   6   4 -11   -0.53    0.52 
   5   4 -11    0.33    0.50 
   5   4 -11    1.31    0.57 
   4   4 -11    0.42    0.51 
   4   4 -11    0.07    0.38 
   3   4 -11    1.69    0.43 
   3   4 -11    0.79    0.46 
   2   4 -11    0.49    0.32 
   2   4 -11    0.79    0.30 
   1   4 -11    4.69    0.57 
   1   4 -11    4.95    0.68 
   0   4 -11    2.02    0.43 
   0   4 -11    2.41    0.40 
  -1   4 -11    0.55    0.27 
  -1   4 -11    0.82    0.27 
  -2   4 -11   -0.12    0.22 
  -2   4 -11   -0.08    0.23 
  -3   4 -11    2.92    0.54 
  -4   4 -11    2.02    0.52 
  -5   4 -11    0.31    0.36 
  -6   4 -11   -0.16    0.30 
  -7   4 -11   -0.38    0.49 
   8   3 -11    0.06    0.69 
   7   3 -11    0.47    0.60 
   6   3 -11    0.96    0.59 
   5   3 -11   -0.12    0.41 
   5   3 -11    0.00    0.41 
   4   3 -11    2.09    0.56 
   4   3 -11    2.08    0.63 
   3   3 -11    2.02    0.44 
   3   3 -11    2.22    0.56 
   2   3 -11    2.49    0.54 
   2   3 -11    1.88    0.41 
   1   3 -11    0.18    0.21 
   1   3 -11    0.41    0.26 
   0   3 -11    4.73    0.64 
   0   3 -11    3.36    0.47 
  -1   3 -11    0.66    0.26 
  -1   3 -11    1.55    0.36 
  -2   3 -11    0.69    0.28 
  -2   3 -11    0.48    0.27 
  -3   3 -11    3.44    0.49 
  -3   3 -11    2.38    0.54 
  -4   3 -11    0.01    0.29 
  -5   3 -11    2.86    0.61 
  -6   3 -11    0.37    0.40 
  -7   3 -11   -0.09    0.47 
   8   2 -11    0.60    0.74 
   7   2 -11    0.57    0.64 
   6   2 -11    0.08    0.43 
   5   2 -11    0.78    0.50 
   5   2 -11    0.22    0.43 
   4   2 -11    0.47    0.44 
   4   2 -11    0.35    0.32 
   3   2 -11    1.54    0.41 
   3   2 -11    1.30    0.51 
   2   2 -11    0.14    0.20 
   2   2 -11   -0.04    0.26 
   1   2 -11    1.63    0.44 
   1   2 -11    1.25    0.30 
   0   2 -11    0.14    0.23 
   0   2 -11    0.25    0.19 
  -1   2 -11    7.37    0.73 
  -1   2 -11    8.68    0.84 
  -2   2 -11    1.56    0.38 
  -2   2 -11    1.44    0.37 
  -3   2 -11   -0.09    0.26 
  -3   2 -11    0.22    0.21 
  -4   2 -11    0.00    0.26 
  -5   2 -11    1.01    0.46 
  -6   2 -11    1.03    0.50 
  -7   2 -11    0.36    0.54 
   8   1 -11    0.44    0.69 
   7   1 -11    1.60    0.70 
   6   1 -11    0.68    0.47 
   5   1 -11    0.46    0.44 
   4   1 -11    0.23    0.33 
   4   1 -11    0.20    0.33 
   3   1 -11   -0.01    0.20 
   3   1 -11    0.75    0.42 
   2   1 -11    0.26    0.21 
   2   1 -11    0.13    0.27 
   1   1 -11   10.93    1.02 
   1   1 -11    8.20    0.70 
   0   1 -11    0.11    0.16 
   0   1 -11   -0.20    0.20 
  -1   1 -11    0.36    0.26 
  -1   1 -11   -0.03    0.17 
  -2   1 -11   -0.16    0.23 
  -2   1 -11    0.32    0.26 
  -3   1 -11    5.38    0.73 
  -3   1 -11    8.03    0.77 
  -4   1 -11    1.68    0.47 
  -4   1 -11    2.19    0.43 
  -5   1 -11   -0.04    0.30 
  -6   1 -11    0.23    0.43 
  -7   1 -11   -0.08    0.45 
   8   0 -11   -0.13    0.58 
   7   0 -11    0.12    0.47 
   6   0 -11    0.01    0.38 
   5   0 -11    0.53    0.43 
   4   0 -11    0.25    0.29 
   4   0 -11    0.29    0.40 
   3   0 -11   14.20    1.32 
   3   0 -11   11.00    0.92 
   2   0 -11    1.66    0.47 
   2   0 -11    1.64    0.34 
   1   0 -11    3.76    0.64 
   0   0 -11    3.11    0.55 
   0   0 -11    4.10    0.46 
  -1   0 -11    3.27    0.49 
  -1   0 -11    4.75    0.63 
  -2   0 -11    0.29    0.25 
  -2   0 -11    0.38    0.26 
  -3   0 -11    1.88    0.47 
  -3   0 -11    1.94    0.45 
  -4   0 -11    5.37    0.73 
  -4   0 -11    4.24    0.69 
  -5   0 -11    0.00    0.34 
  -6   0 -11   -0.06    0.43 
  -7   0 -11    0.40    0.53 
   8  -1 -11    0.53    0.63 
   7  -1 -11    2.35    0.75 
   6  -1 -11    0.14    0.38 
   5  -1 -11   -0.07    0.37 
   4  -1 -11   -0.33    0.25 
   4  -1 -11   -0.13    0.29 
  -4   1  11    0.67    0.30 
   3  -1 -11    1.35    0.35 
   3  -1 -11    1.07    0.46 
   2  -1 -11    0.67    0.37 
   2  -1 -11    0.79    0.25 
   1  -1 -11   -0.25    0.20 
   1  -1 -11    0.95    0.22 
   0  -1 -11    0.98    0.31 
   0  -1 -11    0.87    0.25 
  -1  -1 -11    2.87    0.45 
  -1  -1 -11    3.38    0.55 
  -2  -1 -11    4.49    0.62 
  -2  -1 -11    3.71    0.55 
  -3  -1 -11   -0.88    0.26 
  -3  -1 -11   -0.23    0.26 
  -4  -1 -11    4.42    0.69 
  -4  -1 -11    3.64    0.67 
  -5  -1 -11    1.58    0.57 
  -5  -1 -11    1.51    0.48 
  -6  -1 -11    0.15    0.47 
  -7  -1 -11    0.70    0.60 
   8  -2 -11   -0.42    0.52 
   7  -2 -11    1.18    0.64 
   6  -2 -11    0.80    0.45 
   5  -2 -11    0.79    0.48 
   4  -2 -11    0.82    0.45 
  -4   2  11    0.89    0.33 
   3  -2 -11   23.78    1.52 
   3  -2 -11   23.35    1.85 
  -3   2  11   25.49    1.64 
   2  -2 -11   -0.01    0.28 
   2  -2 -11    0.27    0.20 
   1  -2 -11    1.81    0.28 
   1  -2 -11    2.30    0.48 
   0  -2 -11    1.19    0.25 
   0  -2 -11    2.21    0.45 
  -1  -2 -11    1.08    0.34 
  -1  -2 -11    1.21    0.31 
  -2  -2 -11   11.03    1.05 
  -2  -2 -11   10.46    0.89 
  -3  -2 -11    0.55    0.35 
  -3  -2 -11    0.71    0.40 
  -4  -2 -11    2.15    0.58 
  -4  -2 -11    0.41    0.38 
  -5  -2 -11    0.06    0.47 
  -5  -2 -11    0.24    0.41 
  -6  -2 -11   -0.34    0.39 
  -7  -2 -11    0.59    0.63 
   8  -3 -11    0.37    0.64 
   7  -3 -11   -0.34    0.48 
   6  -3 -11    1.00    0.50 
   5  -3 -11    0.58    0.42 
  -5   3  11    0.52    0.29 
   4  -3 -11    3.86    0.77 
  -4   3  11    5.83    0.68 
   3  -3 -11   -0.22    0.26 
  -3   3  11    0.38    0.31 
   2  -3 -11    3.63    0.69 
   2  -3 -11    4.25    0.44 
   1  -3 -11   -0.09    0.27 
   1  -3 -11    0.19    0.14 
   0  -3 -11    7.77    0.59 
   0  -3 -11    5.57    0.78 
  -1  -3 -11    7.81    0.67 
  -1  -3 -11    7.45    0.86 
  -2  -3 -11    2.59    0.57 
  -2  -3 -11    2.61    0.47 
  -3  -3 -11   11.87    1.18 
  -3  -3 -11   12.56    1.05 
  -4  -3 -11   -0.38    0.30 
  -4  -3 -11    0.15    0.43 
  -5  -3 -11    0.72    0.50 
  -5  -3 -11   -0.37    0.29 
  -6  -3 -11   -0.65    0.45 
  -6  -3 -11    0.66    0.62 
  -7  -3 -11    0.20    0.66 
   8  -4 -11    0.22    0.64 
   7  -4 -11    0.64    0.53 
   6  -4 -11    0.67    0.47 
   5  -4 -11    0.10    0.33 
  -5   4  11   -0.03    0.26 
   4  -4 -11    3.33    0.70 
   3  -4 -11   -0.09    0.30 
  -3   4  11    0.37    0.29 
   2  -4 -11    0.86    0.39 
   1  -4 -11    7.46    0.89 
   1  -4 -11    8.37    0.59 
   0  -4 -11    1.27    0.41 
   0  -4 -11    2.26    0.34 
  -1  -4 -11   24.85    1.64 
  -1  -4 -11   27.81    1.87 
  -2  -4 -11   11.49    0.92 
  -2  -4 -11   10.56    1.11 
  -3  -4 -11   -0.06    0.38 
  -3  -4 -11    0.05    0.32 
  -4  -4 -11    1.87    0.61 
  -4  -4 -11    1.28    0.46 
  -5  -4 -11   -0.41    0.48 
  -5  -4 -11   -0.02    0.36 
  -6  -4 -11    1.14    0.71 
  -6  -4 -11    0.88    0.56 
   8  -5 -11    0.65    0.66 
   7  -5 -11    0.38    0.49 
   6  -5 -11    0.62    0.49 
   5  -5 -11    0.19    0.37 
  -5   5  11    0.01    0.31 
   4  -5 -11    1.36    0.51 
  -4   5  11    1.41    0.43 
   3  -5 -11    0.16    0.33 
  -3   5  11    0.65    0.36 
   2  -5 -11    2.24    0.54 
   1  -5 -11    6.04    0.80 
   0  -5 -11    5.17    0.50 
   0  -5 -11    3.60    0.68 
  -1  -5 -11    7.04    0.90 
  -2  -5 -11    2.74    0.49 
  -2  -5 -11    1.40    0.48 
  -3  -5 -11    0.62    0.47 
  -3  -5 -11    0.19    0.33 
  -4  -5 -11    0.79    0.41 
  -4  -5 -11    0.59    0.54 
  -5  -5 -11    0.09    0.41 
  -5  -5 -11    0.04    0.55 
  -6  -5 -11    0.17    0.67 
  -6  -5 -11   -0.44    0.49 
   8  -6 -11   -0.01    0.57 
   7  -6 -11    0.37    0.52 
   6  -6 -11    1.02    0.47 
  -6   6  11    0.36    0.37 
   5  -6 -11    0.37    0.36 
  -5   6  11    0.01    0.34 
   4  -6 -11   -0.06    0.35 
  -4   6  11    0.88    0.38 
   3  -6 -11    0.06    0.30 
  -3   6  11   -0.03    0.29 
   2  -6 -11    0.61    0.32 
  -2   6  11    0.23    0.32 
   1  -6 -11   -0.03    0.32 
   0  -6 -11   -0.10    0.27 
  -1  -6 -11   -0.02    0.32 
  -1  -6 -11    0.49    0.26 
  -2  -6 -11    0.83    0.46 
  -2  -6 -11    0.03    0.31 
  -3  -6 -11    0.59    0.45 
  -3  -6 -11    1.45    0.46 
  -4  -6 -11    0.43    0.42 
  -4  -6 -11    0.27    0.49 
  -5  -6 -11    0.45    0.62 
  -5  -6 -11    0.31    0.47 
  -6  -6 -11   -0.41    0.53 
  -6  -6 -11   -0.01    0.70 
   8  -7 -11   -0.10    0.59 
   7  -7 -11    0.12    0.49 
   6  -7 -11    1.26    0.56 
  -6   7  11    0.95    0.43 
   5  -7 -11    0.12    0.35 
  -5   7  11   -0.19    0.33 
   4  -7 -11    1.30    0.46 
  -4   7  11    0.97    0.41 
   3  -7 -11   -0.06    0.27 
  -3   7  11    0.06    0.32 
   2  -7 -11   -0.07    0.23 
  -2   7  11    0.32    0.35 
   1  -7 -11    0.63    0.34 
   0  -7 -11    1.80    0.51 
  -1  -7 -11    1.02    0.44 
  -1  -7 -11    0.62    0.31 
  -2  -7 -11    0.13    0.31 
  -2  -7 -11    0.01    0.39 
  -3  -7 -11    0.85    0.43 
  -3  -7 -11    0.69    0.56 
  -4  -7 -11    0.31    0.41 
  -4  -7 -11    0.33    0.51 
  -5  -7 -11    0.64    0.53 
  -5  -7 -11    0.11    0.63 
  -6  -7 -11    0.13    0.61 
  -6  -7 -11    0.93    0.75 
   8  -8 -11   -0.24    0.63 
   7  -8 -11   -0.27    0.47 
   6  -8 -11    0.91    0.53 
  -6   8  11   -0.05    0.35 
   5  -8 -11    0.42    0.39 
  -5   8  11    0.24    0.36 
   4  -8 -11    0.45    0.39 
  -4   8  11    0.28    0.34 
   3  -8 -11    1.21    0.45 
  -3   8  11    1.38    0.48 
   2  -8 -11    1.64    0.47 
  -2   8  11    1.11    0.48 
   1  -8 -11    2.20    0.52 
   0  -8 -11    0.56    0.41 
  -1  -8 -11   -0.24    0.31 
  -2  -8 -11    0.47    0.36 
  -2  -8 -11   -0.26    0.36 
  -3  -8 -11   -0.15    0.35 
  -3  -8 -11    0.24    0.51 
  -4  -8 -11    0.35    0.48 
  -4  -8 -11    0.66    0.60 
  -5  -8 -11    0.37    0.54 
  -5  -8 -11    0.65    0.71 
   8  -9 -11    0.66    0.80 
   7  -9 -11    1.05    0.67 
  -7   9  11   -0.12    0.44 
   6  -9 -11    0.65    0.49 
  -6   9  11    0.50    0.41 
   5  -9 -11    0.34    0.44 
  -5   9  11   -0.41    0.37 
   4  -9 -11    0.03    0.34 
  -4   9  11    0.20    0.36 
   3  -9 -11    0.04    0.30 
  -3   9  11   -0.46    0.33 
   2  -9 -11    0.58    0.39 
  -2   9  11    0.40    0.40 
   1  -9 -11    5.77    0.85 
   0  -9 -11    0.33    0.36 
  -1  -9 -11    1.76    0.59 
  -2  -9 -11    0.90    0.56 
  -3  -9 -11   -0.12    0.46 
  -3  -9 -11    0.08    0.41 
  -4  -9 -11    1.50    0.68 
  -4  -9 -11    0.48    0.51 
  -5  -9 -11   -0.44    0.50 
  -5  -9 -11    0.37    0.69 
   7 -10 -11   -0.27    0.57 
  -7  10  11    0.28    0.50 
   6 -10 -11   -0.57    0.42 
  -6  10  11    0.22    0.46 
   5 -10 -11    1.89    0.61 
  -5  10  11    0.10    0.40 
   4 -10 -11    1.42    0.50 
  -4  10  11    0.88    0.43 
   3 -10 -11    0.84    0.41 
  -3  10  11    0.95    0.45 
   2 -10 -11   -0.24    0.23 
  -2  10  11    0.19    0.39 
   1 -10 -11   -0.38    0.25 
   0 -10 -11    0.10    0.32 
  -1 -10 -11    0.55    0.48 
  -2 -10 -11    0.68    0.55 
  -3 -10 -11    0.46    0.61 
  -4 -10 -11   -0.24    0.64 
  -4 -10 -11    0.55    0.57 
  -5 -10 -11    0.25    0.68 
  -5 -10 -11    0.42    0.69 
   7 -11 -11    0.03    0.62 
  -7  11  11    0.10    0.51 
   6 -11 -11    0.50    0.55 
  -6  11  11    0.79    0.53 
   5 -11 -11    0.02    0.47 
  -5  11  11    0.00    0.39 
   4 -11 -11   -0.34    0.37 
  -4  11  11   -0.16    0.38 
   3 -11 -11    0.44    0.40 
  -3  11  11    0.58    0.47 
   2 -11 -11    0.18    0.32 
  -2  11  11   -0.04    0.38 
   1 -11 -11    0.13    0.32 
   0 -11 -11    0.31    0.36 
  -1 -11 -11    0.20    0.40 
  -2 -11 -11    0.32    0.55 
  -3 -11 -11    0.33    0.67 
  -4 -11 -11    0.23    0.71 
  -7  12  11   -0.14    0.55 
   6 -12 -11   -0.35    0.47 
  -6  12  11    0.92    0.54 
   5 -12 -11   -0.17    0.44 
  -5  12  11    0.12    0.45 
   4 -12 -11    0.35    0.41 
  -4  12  11   -0.12    0.39 
   3 -12 -11   -0.06    0.33 
  -3  12  11    0.71    0.51 
   2 -12 -11    0.16    0.36 
  -2  12  11    1.20    0.55 
   1 -12 -11    0.58    0.38 
   0 -12 -11    1.96    0.54 
  -1 -12 -11    0.36    0.39 
  -2 -12 -11    0.71    0.64 
  -3 -12 -11    0.99    0.69 
  -4 -12 -11   -0.25    0.64 
   6 -13 -11    0.47    0.60 
  -6  13  11   -0.10    0.51 
   5 -13 -11    0.17    0.48 
  -5  13  11    0.37    0.51 
   4 -13 -11    0.75    0.49 
  -4  13  11   -0.33    0.42 
   3 -13 -11    0.81    0.42 
  -3  13  11   -0.70    0.37 
   2 -13 -11    0.84    0.49 
  -2  13  11    1.88    0.69 
   1 -13 -11   -0.19    0.34 
   0 -13 -11   -0.05    0.37 
  -1 -13 -11    0.75    0.46 
  -2 -13 -11    0.63    0.52 
  -3 -13 -11    0.68    0.63 
  -6  14  11   -0.19    0.53 
   5 -14 -11    0.22    0.56 
  -5  14  11   -0.01    0.46 
   4 -14 -11    0.25    0.48 
  -4  14  11    0.31    0.49 
   3 -14 -11    0.39    0.44 
  -3  14  11   -0.15    0.48 
   2 -14 -11   -0.18    0.36 
  -2  14  11   -0.23    0.49 
   1 -14 -11    0.78    0.42 
   0 -14 -11    0.52    0.48 
  -1 -14 -11    0.81    0.53 
  -2 -14 -11    0.79    0.60 
  -3 -14 -11    0.64    0.68 
   5 -15 -11    0.82    0.69 
  -5  15  11   -0.09    0.52 
   4 -15 -11    0.46    0.52 
  -4  15  11   -0.01    0.50 
   3 -15 -11    0.13    0.44 
  -3  15  11    0.39    0.60 
   2 -15 -11   -0.05    0.42 
  -2  15  11    0.62    0.62 
   1 -15 -11    0.05    0.37 
   0 -15 -11    0.40    0.48 
  -1 -15 -11    0.37    0.53 
  -2 -15 -11    0.80    0.70 
  -5  16  11    0.17    0.56 
   4 -16 -11    0.65    0.63 
  -4  16  11    0.41    0.56 
   3 -16 -11   -0.20    0.49 
  -3  16  11   -0.15    0.56 
   2 -16 -11    0.04    0.51 
  -2  16  11    0.53    0.57 
   1 -16 -11    0.20    0.50 
   0 -16 -11    0.04    0.55 
  -1 -16 -11    0.30    0.61 
   3 -17 -11   -0.07    0.56 
  -3  17  11    0.59    0.56 
   2 -17 -11   -0.02    0.55 
   1 -17 -11    0.03    0.55 
   0  18 -12    0.68    0.65 
  -1  18 -12    0.69    0.62 
  -2  18 -12    1.05    0.68 
   2  17 -12    0.93    0.64 
   1  17 -12    0.20    0.57 
   0  17 -12    0.04    0.53 
  -1  17 -12    0.76    0.65 
  -2  17 -12    0.26    0.62 
  -3  17 -12    0.33    0.63 
   3  16 -12    0.80    0.66 
   2  16 -12    0.11    0.56 
   1  16 -12   -0.05    0.49 
   0  16 -12    0.21    0.58 
  -1  16 -12    0.21    0.56 
  -2  16 -12    1.59    0.72 
  -3  16 -12   -0.81    0.56 
  -4  16 -12   -0.70    0.55 
   3  15 -12   -0.15    0.53 
   2  15 -12    0.07    0.49 
   1  15 -12   -0.10    0.51 
   0  15 -12    0.76    0.59 
  -1  15 -12    0.21    0.47 
  -2  15 -12    0.12    0.51 
  -3  15 -12   -0.21    0.49 
  -4  15 -12   -0.01    0.58 
  -5  15 -12   -0.19    0.44 
   4  14 -12   -0.43    0.56 
  -4 -14  12   -0.09    0.53 
   3  14 -12    0.45    0.56 
   2  14 -12    0.04    0.45 
   1  14 -12    0.09    0.40 
   0  14 -12    0.29    0.47 
  -1  14 -12   -0.06    0.45 
  -2  14 -12    0.25    0.53 
  -3  14 -12    0.55    0.55 
  -4  14 -12   -0.48    0.37 
  -5  14 -12    0.55    0.56 
   5  13 -12    0.99    0.87 
  -5 -13  12    0.51    0.64 
   4  13 -12    0.10    0.55 
  -4 -13  12    0.00    0.42 
   3  13 -12    0.98    0.56 
  -3 -13  12    0.00    0.42 
   2  13 -12    0.59    0.43 
   1  13 -12   -0.12    0.31 
   0  13 -12    0.51    0.43 
  -1  13 -12    0.39    0.46 
  -2  13 -12    0.00    0.44 
  -3  13 -12   -0.13    0.38 
  -4  13 -12   -0.08    0.44 
  -5  13 -12   -0.26    0.49 
  -6  13 -12    0.34    0.49 
   5  12 -12   -0.31    0.63 
  -5 -12  12    0.42    0.51 
   4  12 -12   -0.62    0.40 
  -4 -12  12    0.61    0.44 
   3  12 -12   -0.17    0.39 
  -3 -12  12    0.50    0.42 
   2  12 -12   -0.42    0.27 
  -2 -12  12    0.15    0.45 
   1  12 -12    0.33    0.35 
   0  12 -12    1.39    0.49 
  -1  12 -12   -0.16    0.30 
  -2  12 -12    0.31    0.44 
  -3  12 -12    0.30    0.43 
  -4  12 -12    0.36    0.49 
  -5  12 -12    0.19    0.50 
  -6  12 -12   -0.07    0.51 
  -6 -11  12   -0.03    0.60 
   5  11 -12   -0.19    0.54 
  -5 -11  12    0.10    0.44 
   4  11 -12   -0.21    0.46 
  -4 -11  12    0.11    0.39 
   3  11 -12    0.01    0.39 
   2  11 -12   -0.20    0.46 
   2  11 -12    0.57    0.38 
   1  11 -12    1.12    0.43 
   0  11 -12    0.05    0.29 
  -1  11 -12    0.35    0.32 
  -2  11 -12   -0.14    0.33 
  -3  11 -12    0.07    0.38 
  -4  11 -12    0.02    0.43 
  -5  11 -12    0.08    0.47 
  -6  11 -12   -0.08    0.48 
   6  10 -12    0.48    0.78 
  -6 -10  12   -0.36    0.46 
   5  10 -12   -0.54    0.50 
  -5 -10  12    0.04    0.41 
   4  10 -12    0.34    0.52 
   4  10 -12    0.04    0.54 
   3  10 -12   -0.24    0.32 
   3  10 -12    0.02    0.46 
   2  10 -12    0.32    0.44 
   2  10 -12    0.57    0.38 
   1  10 -12    0.56    0.43 
   1  10 -12    0.65    0.35 
   0  10 -12    0.22    0.32 
  -1  10 -12   -0.04    0.29 
  -2  10 -12    1.66    0.49 
  -3  10 -12    0.51    0.44 
  -4  10 -12    0.26    0.43 
  -5  10 -12    0.58    0.49 
  -6  10 -12   -0.39    0.44 
   6   9 -12    0.72    0.75 
  -6  -9  12    0.18    0.48 
   5   9 -12    0.31    0.60 
   5   9 -12   -0.79    0.46 
   4   9 -12   -0.21    0.41 
   4   9 -12    0.33    0.44 
   3   9 -12   -0.23    0.45 
   3   9 -12    1.13    0.49 
   2   9 -12    0.21    0.31 
   2   9 -12    0.82    0.48 
   1   9 -12    2.82    0.56 
   1   9 -12    2.58    0.57 
   0   9 -12    3.34    0.60 
  -1   9 -12   -0.24    0.28 
  -2   9 -12    2.55    0.54 
  -3   9 -12    0.67    0.38 
  -4   9 -12    0.08    0.37 
  -5   9 -12   -0.16    0.42 
  -6   9 -12    0.17    0.49 
  -7  -8  12    0.82    0.66 
   6   8 -12    0.48    0.68 
   5   8 -12    0.12    0.58 
   5   8 -12   -0.37    0.53 
   4   8 -12    1.11    0.53 
   4   8 -12    0.97    0.58 
   3   8 -12   -0.11    0.43 
   3   8 -12    0.33    0.33 
   2   8 -12    3.80    0.69 
   2   8 -12    2.28    0.61 
   1   8 -12    0.01    0.30 
   1   8 -12   -0.18    0.26 
   0   8 -12   13.81    1.13 
   0   8 -12   12.60    1.06 
  -1   8 -12    0.53    0.32 
  -2   8 -12   -0.05    0.26 
  -3   8 -12   -0.15    0.24 
  -4   8 -12   -0.13    0.29 
  -5   8 -12   -0.33    0.38 
  -6   8 -12   -0.53    0.44 
  -7   8 -12   -0.39    0.47 
   7   7 -12   -0.91    0.66 
   6   7 -12    0.08    0.68 
   5   7 -12   -0.83    0.41 
   5   7 -12   -0.03    0.55 
   4   7 -12    0.93    0.46 
   4   7 -12    0.12    0.49 
   3   7 -12    5.64    0.88 
   3   7 -12    6.07    0.95 
   2   7 -12    0.85    0.44 
   2   7 -12   -0.19    0.27 
   1   7 -12   25.55    1.83 
   1   7 -12   25.85    1.78 
   0   7 -12    1.31    0.39 
   0   7 -12    1.85    0.44 
  -1   7 -12    0.50    0.30 
  -2   7 -12    0.41    0.33 
  -3   7 -12    0.98    0.36 
  -4   7 -12    0.17    0.31 
  -5   7 -12    1.97    0.53 
  -6   7 -12   -0.30    0.45 
  -7   7 -12    0.07    0.53 
   7   6 -12   -0.45    0.75 
   6   6 -12    0.25    0.67 
   5   6 -12    1.15    0.60 
   5   6 -12    0.02    0.54 
   4   6 -12    2.35    0.63 
   4   6 -12    1.36    0.60 
   3   6 -12    1.53    0.55 
   3   6 -12    2.31    0.57 
   2   6 -12   32.62    2.16 
   2   6 -12   31.90    2.28 
   1   6 -12    4.58    0.64 
   1   6 -12    4.57    0.69 
   0   6 -12    8.98    0.90 
   0   6 -12    8.63    0.89 
  -1   6 -12    0.48    0.27 
  -1   6 -12    0.24    0.26 
  -2   6 -12    1.80    0.46 
  -3   6 -12    1.97    0.48 
  -4   6 -12    1.16    0.43 
  -5   6 -12    1.86    0.52 
  -6   6 -12    0.64    0.46 
  -7   6 -12   -0.16    0.54 
   7   5 -12    0.20    0.71 
   6   5 -12    0.35    0.67 
   5   5 -12    0.08    0.47 
   5   5 -12    0.06    0.50 
   4   5 -12    0.23    0.46 
   4   5 -12    0.54    0.46 
   3   5 -12    4.47    0.87 
   3   5 -12    5.79    0.81 
   2   5 -12    0.54    0.40 
   2   5 -12    0.72    0.34 
   1   5 -12    0.95    0.34 
   1   5 -12    0.32    0.28 
   0   5 -12    0.63    0.28 
   0   5 -12    0.87    0.32 
  -1   5 -12    0.56    0.27 
  -1   5 -12    0.59    0.30 
  -2   5 -12    0.65    0.32 
  -3   5 -12    0.03    0.25 
  -4   5 -12    0.03    0.30 
  -5   5 -12   -0.21    0.32 
  -6   5 -12   -0.06    0.38 
  -7   5 -12    0.62    0.57 
   7   4 -12    0.23    0.57 
   6   4 -12    0.53    0.58 
   5   4 -12    0.28    0.52 
   5   4 -12    0.65    0.51 
   4   4 -12    0.31    0.41 
   4   4 -12    0.17    0.42 
   3   4 -12    6.02    0.96 
   3   4 -12    6.25    0.80 
   2   4 -12    2.43    0.62 
   2   4 -12    1.95    0.44 
   1   4 -12    1.56    0.37 
   1   4 -12    1.93    0.44 
   0   4 -12    2.53    0.46 
   0   4 -12    2.47    0.50 
  -1   4 -12    1.50    0.38 
  -1   4 -12    2.67    0.49 
  -2   4 -12    1.82    0.43 
  -2   4 -12    1.73    0.40 
  -3   4 -12    3.15    0.58 
  -4   4 -12    1.22    0.42 
  -5   4 -12    0.36    0.38 
  -6   4 -12    0.03    0.37 
  -7   4 -12    0.44    0.55 
   8   3 -12   -0.13    0.79 
   7   3 -12   -0.20    0.57 
   6   3 -12    0.44    0.64 
   5   3 -12    0.29    0.53 
   5   3 -12    1.93    0.59 
   4   3 -12    0.64    0.44 
   4   3 -12    0.92    0.55 
   3   3 -12    0.17    0.36 
   3   3 -12    0.42    0.33 
   2   3 -12    0.12    0.35 
   2   3 -12    0.43    0.26 
   1   3 -12    0.80    0.28 
   1   3 -12    1.79    0.44 
   0   3 -12    2.10    0.46 
   0   3 -12    3.08    0.44 
  -1   3 -12    7.11    0.75 
  -1   3 -12    8.52    0.85 
  -2   3 -12    2.47    0.48 
  -2   3 -12    3.22    0.51 
  -3   3 -12    0.58    0.33 
  -4   3 -12    2.11    0.54 
  -5   3 -12    0.60    0.42 
  -6   3 -12    1.27    0.51 
  -7   3 -12   -0.10    0.53 
   8   2 -12    0.20    0.80 
   7   2 -12    0.41    0.58 
   6   2 -12    0.06    0.46 
   5   2 -12   -0.41    0.40 
   5   2 -12    0.15    0.47 
   4   2 -12    2.12    0.68 
   4   2 -12    4.33    0.69 
   3   2 -12    1.06    0.37 
   3   2 -12    1.38    0.55 
   2   2 -12    0.24    0.26 
   2   2 -12   -0.02    0.32 
   1   2 -12   -0.02    0.18 
   1   2 -12   -0.15    0.22 
   0   2 -12    0.32    0.21 
   0   2 -12    0.32    0.24 
  -1   2 -12    0.43    0.29 
  -1   2 -12   -0.04    0.19 
  -2   2 -12    0.16    0.27 
  -2   2 -12   -0.12    0.24 
  -3   2 -12   -0.32    0.29 
  -3   2 -12    0.93    0.31 
  -4   2 -12    0.96    0.42 
  -5   2 -12    0.80    0.41 
  -6   2 -12   -0.33    0.35 
  -7   2 -12    0.30    0.59 
   8   1 -12    0.91    0.76 
   7   1 -12   -0.36    0.47 
   6   1 -12    1.89    0.72 
   5   1 -12    0.32    0.46 
   4   1 -12   -0.28    0.26 
   4   1 -12    0.31    0.47 
   3   1 -12    0.09    0.38 
   3   1 -12   -0.10    0.18 
   2   1 -12    0.94    0.46 
   2   1 -12    0.60    0.27 
   1   1 -12   -0.09    0.17 
   1   1 -12   -0.10    0.26 
   0   1 -12   13.59    1.21 
   0   1 -12   17.33    1.12 
  -1   1 -12    2.79    0.46 
  -1   1 -12    3.71    0.58 
  -2   1 -12    1.84    0.44 
  -2   1 -12    1.69    0.41 
  -3   1 -12   10.48    1.06 
  -3   1 -12   12.69    1.00 
  -4   1 -12    1.15    0.42 
  -5   1 -12    1.27    0.46 
  -6   1 -12   -0.17    0.41 
  -7   1 -12    0.00    0.56 
   8   0 -12    0.65    0.72 
   7   0 -12    0.26    0.52 
   6   0 -12   -0.39    0.40 
   5   0 -12    0.43    0.38 
   4   0 -12    0.03    0.32 
   4   0 -12    0.04    0.44 
   3   0 -12    3.80    0.55 
   3   0 -12    3.50    0.74 
   2   0 -12    1.10    0.45 
   2   0 -12    1.07    0.30 
   1   0 -12    1.53    0.48 
   1   0 -12    0.42    0.19 
   0   0 -12    0.36    0.27 
   0   0 -12   -0.08    0.18 
  -1   0 -12    1.34    0.37 
  -1   0 -12    1.74    0.37 
  -2   0 -12    4.46    0.63 
  -2   0 -12    3.12    0.55 
  -3   0 -12   -0.05    0.30 
  -3   0 -12    0.32    0.31 
  -4   0 -12    2.89    0.60 
  -4   0 -12    1.86    0.48 
  -5   0 -12    1.89    0.51 
  -6   0 -12   -0.24    0.38 
  -7   0 -12    0.80    0.63 
   8  -1 -12    0.05    0.62 
   7  -1 -12    0.99    0.62 
   6  -1 -12    1.04    0.54 
   5  -1 -12    0.04    0.36 
   4  -1 -12    0.21    0.43 
   3  -1 -12    2.76    0.67 
   3  -1 -12    3.03    0.49 
   2  -1 -12    0.50    0.39 
   2  -1 -12    0.80    0.25 
   1  -1 -12    2.32    0.55 
   1  -1 -12    2.56    0.37 
   0  -1 -12    2.17    0.35 
   0  -1 -12    0.90    0.41 
  -1  -1 -12    0.36    0.24 
  -1  -1 -12    0.26    0.30 
  -2  -1 -12    1.52    0.42 
  -2  -1 -12    1.54    0.46 
  -3  -1 -12    0.08    0.31 
  -3  -1 -12    0.05    0.32 
  -4  -1 -12    0.07    0.29 
  -4  -1 -12    0.39    0.40 
  -5  -1 -12    0.34    0.37 
  -6  -1 -12   -0.09    0.43 
  -7  -1 -12   -0.77    0.53 
   8  -2 -12    0.38    0.71 
   7  -2 -12    0.36    0.58 
   6  -2 -12    0.28    0.48 
   5  -2 -12    0.55    0.40 
   4  -2 -12    0.84    0.48 
  -4   2  12    2.50    0.48 
   3  -2 -12    0.33    0.41 
   2  -2 -12    1.01    0.28 
   2  -2 -12    0.79    0.42 
   1  -2 -12    0.65    0.20 
   1  -2 -12    0.42    0.34 
   0  -2 -12    4.35    0.69 
  -1  -2 -12    5.86    0.65 
  -1  -2 -12    5.83    0.79 
  -2  -2 -12    4.72    0.62 
  -2  -2 -12    4.76    0.72 
  -3  -2 -12    0.66    0.35 
  -3  -2 -12    0.11    0.37 
  -4  -2 -12    0.21    0.33 
  -4  -2 -12    0.22    0.40 
  -5  -2 -12    0.46    0.41 
  -5  -2 -12   -0.32    0.40 
  -6  -2 -12   -0.80    0.38 
   8  -3 -12   -0.01    0.64 
   7  -3 -12    0.12    0.51 
   6  -3 -12    0.75    0.54 
   5  -3 -12    0.42    0.38 
   4  -3 -12    3.75    0.82 
  -4   3  12    6.00    0.72 
   3  -3 -12   -0.15    0.34 
   2  -3 -12    1.89    0.55 
   1  -3 -12    5.85    0.51 
   1  -3 -12    4.93    0.76 
   0  -3 -12    3.33    0.42 
   0  -3 -12    1.66    0.50 
  -1  -3 -12   23.65    1.76 
  -1  -3 -12   24.84    1.60 
  -2  -3 -12    0.50    0.42 
  -2  -3 -12    2.48    0.46 
  -3  -3 -12    2.57    0.52 
  -3  -3 -12    2.63    0.63 
  -4  -3 -12    0.46    0.44 
  -4  -3 -12    0.73    0.41 
  -5  -3 -12    0.27    0.43 
  -5  -3 -12    0.44    0.52 
  -6  -3 -12    1.23    0.63 
   8  -4 -12    0.01    0.64 
   7  -4 -12    0.44    0.55 
   6  -4 -12    0.35    0.50 
   5  -4 -12    0.72    0.48 
  -5   4  12    0.67    0.40 
   4  -4 -12    2.01    0.58 
  -4   4  12    3.61    0.61 
   3  -4 -12    0.24    0.36 
  -3   4  12    0.08    0.32 
   2  -4 -12    2.38    0.58 
   1  -4 -12    1.36    0.43 
   0  -4 -12    2.61    0.38 
   0  -4 -12    1.79    0.53 
  -1  -4 -12    0.53    0.39 
  -1  -4 -12    0.21    0.24 
  -2  -4 -12    4.60    0.62 
  -2  -4 -12    4.56    0.76 
  -3  -4 -12    0.42    0.35 
  -3  -4 -12    0.21    0.40 
  -4  -4 -12    0.78    0.51 
  -4  -4 -12    0.32    0.38 
  -5  -4 -12   -0.07    0.40 
  -5  -4 -12    0.07    0.49 
  -6  -4 -12    0.52    0.54 
   8  -5 -12   -0.03    0.68 
   7  -5 -12   -0.66    0.44 
   6  -5 -12    0.53    0.51 
   5  -5 -12    0.52    0.46 
  -5   5  12    0.65    0.39 
   4  -5 -12    1.00    0.47 
  -4   5  12    1.17    0.44 
   3  -5 -12    0.13    0.30 
  -3   5  12   -0.22    0.30 
   2  -5 -12    0.08    0.29 
   1  -5 -12    2.71    0.60 
   0  -5 -12    0.72    0.40 
  -1  -5 -12    7.49    0.95 
  -2  -5 -12    0.33    0.32 
  -2  -5 -12    0.09    0.39 
  -3  -5 -12    0.05    0.31 
  -3  -5 -12    0.01    0.40 
  -4  -5 -12    0.22    0.42 
  -4  -5 -12    0.72    0.53 
  -5  -5 -12   -0.46    0.42 
  -5  -5 -12    0.16    0.57 
  -6  -5 -12    0.32    0.62 
  -6  -5 -12    0.87    0.74 
   8  -6 -12   -0.22    0.71 
   7  -6 -12    0.26    0.55 
   6  -6 -12    0.24    0.45 
   5  -6 -12    1.39    0.57 
  -5   6  12    1.47    0.46 
   4  -6 -12    0.48    0.39 
  -4   6  12    0.14    0.35 
   3  -6 -12   -0.32    0.25 
  -3   6  12    0.24    0.36 
   2  -6 -12    0.40    0.33 
   1  -6 -12   -0.18    0.32 
   0  -6 -12    5.93    0.85 
  -1  -6 -12    2.92    0.48 
  -1  -6 -12    1.40    0.52 
  -2  -6 -12    1.12    0.40 
  -2  -6 -12    1.71    0.55 
  -3  -6 -12   -0.69    0.27 
  -3  -6 -12   -0.03    0.44 
  -4  -6 -12   -0.28    0.46 
  -4  -6 -12    0.45    0.44 
  -5  -6 -12    0.77    0.66 
  -5  -6 -12   -0.54    0.43 
  -6  -6 -12    0.09    0.65 
  -6  -6 -12   -0.51    0.62 
   8  -7 -12   -0.26    0.60 
   7  -7 -12    0.06    0.53 
   6  -7 -12   -0.09    0.43 
  -6   7  12    0.14    0.40 
   5  -7 -12   -0.23    0.31 
  -5   7  12   -0.42    0.36 
   4  -7 -12    0.04    0.34 
  -4   7  12   -0.31    0.34 
   3  -7 -12    0.80    0.43 
  -3   7  12    1.12    0.48 
   2  -7 -12    1.10    0.43 
   1  -7 -12    2.24    0.57 
   0  -7 -12    0.11    0.32 
  -1  -7 -12   -0.38    0.33 
  -2  -7 -12    0.05    0.34 
  -2  -7 -12    0.03    0.40 
  -3  -7 -12   -0.07    0.36 
  -3  -7 -12    0.61    0.48 
  -4  -7 -12    0.14    0.44 
  -4  -7 -12   -0.21    0.54 
  -5  -7 -12   -0.09    0.65 
  -5  -7 -12    0.07    0.52 
   8  -8 -12    0.68    0.76 
   7  -8 -12    0.17    0.62 
   6  -8 -12    0.90    0.57 
  -6   8  12    0.20    0.43 
   5  -8 -12    0.36    0.38 
  -5   8  12    0.52    0.41 
   4  -8 -12    0.97    0.46 
  -4   8  12    0.28    0.40 
   3  -8 -12    0.30    0.29 
  -3   8  12    0.47    0.42 
   2  -8 -12    0.85    0.39 
   1  -8 -12    3.07    0.63 
   0  -8 -12    2.38    0.60 
  -1  -8 -12   -0.40    0.30 
  -2  -8 -12   -0.22    0.36 
  -3  -8 -12    1.35    0.64 
  -3  -8 -12    1.18    0.53 
  -4  -8 -12    0.18    0.58 
  -4  -8 -12   -0.42    0.39 
  -5  -8 -12    0.75    0.59 
  -5  -8 -12    1.32    0.77 
   7  -9 -12   -0.57    0.55 
   6  -9 -12    0.03    0.50 
  -6   9  12    0.31    0.45 
   5  -9 -12    0.67    0.53 
  -5   9  12    0.95    0.48 
   4  -9 -12   -0.21    0.34 
  -4   9  12    0.13    0.36 
   3  -9 -12    0.34    0.34 
  -3   9  12    1.22    0.50 
   2  -9 -12    0.83    0.40 
   1  -9 -12    0.73    0.39 
   0  -9 -12    1.42    0.53 
  -1  -9 -12    0.02    0.40 
  -2  -9 -12    2.84    0.73 
  -3  -9 -12    0.61    0.61 
  -4  -9 -12    0.25    0.56 
  -4  -9 -12    0.94    0.69 
  -5  -9 -12    0.40    0.69 
  -5  -9 -12   -0.34    0.64 
   7 -10 -12    0.07    0.62 
  -7  10  12   -0.07    0.47 
   6 -10 -12   -0.03    0.50 
  -6  10  12   -0.38    0.44 
   5 -10 -12    0.72    0.51 
  -5  10  12    0.29    0.48 
   4 -10 -12    0.00    0.32 
  -4  10  12    0.05    0.45 
   3 -10 -12    0.25    0.35 
  -3  10  12    0.33    0.45 
   2 -10 -12   -0.05    0.30 
  -2  10  12    0.55    0.43 
   1 -10 -12    0.16    0.32 
   0 -10 -12    0.07    0.33 
  -1 -10 -12   -0.16    0.42 
  -2 -10 -12    0.20    0.52 
  -3 -10 -12   -0.34    0.54 
  -4 -10 -12    0.25    0.68 
   7 -11 -12    0.34    0.68 
  -7  11  12    0.42    0.56 
   6 -11 -12   -0.42    0.53 
  -6  11  12    0.33    0.53 
   5 -11 -12   -0.19    0.44 
  -5  11  12    0.22    0.50 
   4 -11 -12    1.01    0.53 
  -4  11  12    0.33    0.44 
   3 -11 -12    0.03    0.35 
  -3  11  12   -0.09    0.47 
   2 -11 -12    0.73    0.43 
  -2  11  12    0.27    0.45 
   1 -11 -12    0.05    0.37 
   0 -11 -12    0.65    0.43 
  -1 -11 -12   -0.10    0.47 
  -2 -11 -12   -0.15    0.52 
  -3 -11 -12    0.60    0.60 
  -4 -11 -12    0.75    0.66 
   6 -12 -12   -0.11    0.53 
  -6  12  12   -0.14    0.52 
   5 -12 -12   -0.23    0.46 
  -5  12  12    0.43    0.46 
   4 -12 -12   -0.20    0.35 
  -4  12  12    0.25    0.49 
   3 -12 -12    0.17    0.40 
  -3  12  12    0.55    0.54 
   2 -12 -12    0.89    0.47 
  -2  12  12    0.91    0.55 
   1 -12 -12   -0.38    0.30 
   0 -12 -12    0.09    0.38 
  -1 -12 -12   -0.09    0.38 
  -2 -12 -12    1.48    0.72 
  -3 -12 -12    0.26    0.63 
   6 -13 -12    0.17    0.64 
  -6  13  12   -0.14    0.52 
   5 -13 -12    0.58    0.56 
  -5  13  12    0.29    0.58 
   4 -13 -12    0.61    0.55 
  -4  13  12    0.04    0.52 
   3 -13 -12   -0.20    0.37 
  -3  13  12   -0.27    0.51 
   2 -13 -12    0.20    0.41 
   1 -13 -12    0.13    0.40 
   0 -13 -12    0.62    0.40 
  -1 -13 -12    0.23    0.48 
  -2 -13 -12    1.04    0.69 
  -3 -13 -12    0.58    0.65 
   6 -14 -12   -0.14    0.80 
  -6  14  12    0.13    0.53 
   5 -14 -12    0.58    0.67 
  -5  14  12   -0.17    0.55 
   4 -14 -12    0.95    0.57 
  -4  14  12    0.33    0.61 
   3 -14 -12    0.48    0.49 
  -3  14  12    0.26    0.56 
   2 -14 -12    0.10    0.43 
   1 -14 -12    0.32    0.42 
   0 -14 -12    0.40    0.48 
  -1 -14 -12    0.26    0.51 
  -2 -14 -12    0.34    0.61 
   5 -15 -12    0.06    0.64 
  -5  15  12    0.19    0.59 
   4 -15 -12   -0.14    0.50 
  -4  15  12   -0.42    0.51 
   3 -15 -12    0.43    0.53 
  -3  15  12    0.46    0.62 
   2 -15 -12    0.26    0.47 
   1 -15 -12    0.02    0.49 
   0 -15 -12    0.05    0.47 
  -1 -15 -12    0.59    0.56 
   4 -16 -12   -0.31    0.61 
  -4  16  12    0.00    0.57 
   3 -16 -12    0.55    0.60 
  -3  16  12    0.15    0.56 
   2 -16 -12    0.15    0.57 
   1 -16 -12    0.30    0.54 
   0 -16 -12    0.54    0.62 
   1  17 -13    0.49    0.53 
   0  17 -13   -0.38    0.50 
  -1  17 -13    0.78    0.59 
  -2  17 -13    1.17    0.70 
   2  16 -13   -0.02    0.58 
   1  16 -13    0.17    0.55 
   0  16 -13   -0.54    0.57 
  -1  16 -13    1.26    0.71 
  -2  16 -13   -0.32    0.53 
  -3  16 -13    0.38    0.64 
   3  15 -13    0.20    0.63 
   2  15 -13    0.31    0.49 
   1  15 -13    0.46    0.51 
   0  15 -13    0.52    0.61 
  -1  15 -13    1.74    0.72 
  -2  15 -13   -0.27    0.51 
  -3  15 -13   -0.14    0.55 
  -4  15 -13    0.03    0.55 
   4  14 -13    0.92    0.73 
  -4 -14  13    0.33    0.65 
   3  14 -13    1.56    0.69 
   2  14 -13   -0.18    0.40 
   1  14 -13    0.75    0.48 
   0  14 -13    0.03    0.37 
  -1  14 -13    0.14    0.51 
  -2  14 -13    0.29    0.55 
  -3  14 -13   -0.03    0.49 
  -4  14 -13    0.14    0.52 
  -5  14 -13   -0.22    0.51 
   4  13 -13    0.26    0.64 
  -4 -13  13    0.25    0.50 
   3  13 -13    0.24    0.50 
  -3 -13  13    0.58    0.57 
   2  13 -13    0.48    0.39 
   1  13 -13   -0.27    0.32 
   0  13 -13    0.06    0.36 
  -1  13 -13    0.34    0.41 
  -2  13 -13    0.78    0.53 
  -3  13 -13    0.21    0.47 
  -4  13 -13   -0.12    0.47 
  -5  13 -13    0.01    0.50 
   5  12 -13   -0.12    0.68 
  -5 -12  13   -0.18    0.50 
   4  12 -13    0.41    0.61 
  -4 -12  13    0.54    0.50 
   3  12 -13    0.75    0.53 
  -3 -12  13    0.41    0.44 
   2  12 -13   -0.07    0.38 
   1  12 -13    0.42    0.34 
   0  12 -13    0.95    0.43 
  -1  12 -13    0.29    0.37 
  -2  12 -13    0.94    0.48 
  -3  12 -13    0.03    0.43 
  -4  12 -13    0.82    0.53 
  -5  12 -13    0.00    0.51 
   5  11 -13   -0.51    0.62 
  -5 -11  13   -0.17    0.48 
   4  11 -13    0.32    0.51 
  -4 -11  13    0.20    0.40 
   3  11 -13   -0.22    0.37 
   3  11 -13    0.24    0.50 
   2  11 -13    0.90    0.44 
   2  11 -13   -0.05    0.52 
   1  11 -13    0.75    0.44 
   0  11 -13   -0.07    0.31 
  -1  11 -13   -0.06    0.32 
  -2  11 -13    0.70    0.39 
  -3  11 -13   -0.28    0.34 
  -4  11 -13    0.82    0.54 
  -5  11 -13   -0.39    0.47 
  -6  11 -13    0.31    0.50 
   6  10 -13    0.16    0.83 
  -6 -10  13    0.51    0.66 
   5  10 -13   -0.09    0.69 
   5  10 -13   -0.68    0.51 
   4  10 -13   -0.57    0.54 
   4  10 -13    0.65    0.53 
   3  10 -13   -0.10    0.46 
   3  10 -13    0.49    0.47 
   2  10 -13    0.27    0.48 
   2  10 -13    0.02    0.30 
   1  10 -13    0.57    0.36 
   0  10 -13    0.05    0.33 
  -1  10 -13    0.22    0.32 
  -2  10 -13    0.00    0.27 
  -3  10 -13    0.07    0.32 
  -4  10 -13   -0.10    0.40 
  -5  10 -13    0.51    0.52 
  -6  10 -13   -0.02    0.49 
   6   9 -13   -0.15    0.72 
   6   9 -13   -0.01    0.74 
   5   9 -13   -0.09    0.53 
   5   9 -13   -0.48    0.63 
   4   9 -13    0.30    0.55 
   4   9 -13    0.60    0.48 
   3   9 -13   -0.20    0.53 
   3   9 -13   -0.07    0.31 
   2   9 -13    1.26    0.56 
   2   9 -13    3.13    0.62 
   1   9 -13   -0.34    0.37 
   1   9 -13    0.50    0.35 
   0   9 -13    0.45    0.35 
  -1   9 -13    0.63    0.40 
  -2   9 -13    0.28    0.31 
  -3   9 -13    0.22    0.33 
  -4   9 -13    0.81    0.40 
  -5   9 -13    0.03    0.48 
  -6   9 -13   -0.19    0.43 
   6   8 -13   -0.34    0.69 
   6   8 -13   -0.06    0.68 
   5   8 -13   -0.05    0.52 
   5   8 -13   -0.01    0.53 
   4   8 -13    0.34    0.47 
   4   8 -13    0.12    0.51 
   3   8 -13   -0.45    0.32 
   3   8 -13    0.66    0.49 
   2   8 -13    0.19    0.43 
   2   8 -13    0.29    0.36 
   1   8 -13    0.26    0.36 
   1   8 -13   -0.06    0.29 
   0   8 -13    1.70    0.47 
  -1   8 -13    1.95    0.49 
  -2   8 -13    1.38    0.43 
  -3   8 -13    0.94    0.42 
  -4   8 -13    0.49    0.34 
  -5   8 -13    0.24    0.42 
  -6   8 -13   -0.03    0.49 
   7   7 -13    0.98    0.81 
   6   7 -13   -0.13    0.66 
   6   7 -13    0.98    0.78 
   5   7 -13    0.29    0.57 
   5   7 -13   -0.60    0.48 
   4   7 -13    0.56    0.49 
   4   7 -13    1.18    0.63 
   3   7 -13    0.48    0.39 
   3   7 -13    0.26    0.49 
   2   7 -13    7.21    1.05 
   2   7 -13    8.89    1.00 
   1   7 -13    6.68    0.84 
   1   7 -13    7.60    0.93 
   0   7 -13    0.96    0.33 
   0   7 -13    0.03    0.27 
  -1   7 -13   -0.14    0.25 
  -2   7 -13    0.72    0.35 
  -3   7 -13    0.05    0.30 
  -4   7 -13    0.48    0.34 
  -5   7 -13    0.22    0.35 
  -6   7 -13    0.52    0.49 
   7   6 -13    0.30    0.71 
   6   6 -13   -0.09    0.64 
   5   6 -13    0.75    0.66 
   5   6 -13   -0.48    0.49 
   4   6 -13    0.11    0.49 
   4   6 -13    1.01    0.54 
   3   6 -13    2.01    0.67 
   3   6 -13    3.21    0.65 
   2   6 -13    9.34    0.99 
   2   6 -13    9.11    1.11 
   1   6 -13    0.84    0.35 
   1   6 -13    0.31    0.39 
   0   6 -13    1.57    0.42 
   0   6 -13    2.12    0.48 
  -1   6 -13    0.26    0.27 
  -2   6 -13    1.11    0.40 
  -3   6 -13    1.03    0.40 
  -4   6 -13    2.45    0.59 
  -5   6 -13    1.97    0.56 
  -6   6 -13    0.81    0.49 
   7   5 -13    0.13    0.72 
   6   5 -13   -0.21    0.64 
   5   5 -13    0.56    0.53 
   5   5 -13   -0.61    0.48 
   4   5 -13    4.24    0.82 
   4   5 -13    4.77    0.94 
   3   5 -13    6.87    0.89 
   3   5 -13    6.29    1.00 
   2   5 -13    5.11    0.85 
   2   5 -13    6.62    0.80 
   1   5 -13   -0.25    0.33 
   1   5 -13    0.49    0.29 
   0   5 -13    2.58    0.52 
   0   5 -13    1.97    0.46 
  -1   5 -13    0.60    0.26 
  -1   5 -13    0.00    0.25 
  -2   5 -13    3.32    0.59 
  -3   5 -13    0.64    0.36 
  -4   5 -13    3.91    0.69 
  -5   5 -13    0.35    0.38 
  -6   5 -13    0.68    0.50 
   7   4 -13   -0.32    0.59 
   6   4 -13   -0.10    0.59 
   5   4 -13    1.05    0.59 
   5   4 -13    1.35    0.67 
   4   4 -13    0.85    0.49 
   4   4 -13    0.36    0.47 
   3   4 -13    1.35    0.46 
   3   4 -13    1.68    0.60 
   2   4 -13   -0.66    0.35 
   2   4 -13    0.48    0.33 
   1   4 -13    0.02    0.23 
   1   4 -13    0.40    0.40 
   0   4 -13    0.18    0.24 
   0   4 -13    0.37    0.28 
  -1   4 -13    0.93    0.35 
  -1   4 -13    0.90    0.35 
  -2   4 -13    0.26    0.31 
  -3   4 -13   -0.16    0.23 
  -4   4 -13    0.07    0.29 
  -5   4 -13    1.26    0.50 
  -6   4 -13    0.09    0.50 
   7   3 -13    0.16    0.65 
   6   3 -13    0.02    0.63 
   5   3 -13    0.46    0.53 
   5   3 -13    2.14    0.70 
   4   3 -13   -0.32    0.40 
   4   3 -13    0.26    0.41 
   3   3 -13    0.25    0.43 
   3   3 -13    0.65    0.38 
   2   3 -13    0.26    0.38 
   2   3 -13    0.01    0.26 
   1   3 -13   -0.18    0.34 
   1   3 -13    0.15    0.23 
   0   3 -13    0.10    0.23 
   0   3 -13   -0.06    0.26 
  -1   3 -13    2.90    0.53 
  -1   3 -13    1.82    0.42 
  -2   3 -13    4.76    0.68 
  -2   3 -13    3.86    0.60 
  -3   3 -13   -0.04    0.26 
  -4   3 -13   -0.25    0.28 
  -5   3 -13    0.84    0.41 
  -6   3 -13   -0.25    0.45 
   7   2 -13    0.86    0.66 
   6   2 -13    0.41    0.61 
   5   2 -13   -0.07    0.43 
   4   2 -13    3.46    0.70 
   4   2 -13    2.90    0.73 
   3   2 -13    0.35    0.32 
   3   2 -13   -0.32    0.34 
   2   2 -13    0.11    0.35 
   2   2 -13    0.22    0.24 
   1   2 -13    1.41    0.34 
   1   2 -13    1.62    0.53 
   0   2 -13    1.74    0.47 
   0   2 -13    1.62    0.35 
  -1   2 -13    0.11    0.24 
  -1   2 -13   -0.11    0.24 
  -2   2 -13    3.52    0.58 
  -2   2 -13    3.39    0.58 
  -3   2 -13   -0.18    0.27 
  -3   2 -13   -0.06    0.23 
  -4   2 -13    0.37    0.36 
  -5   2 -13    0.59    0.40 
  -6   2 -13    0.44    0.45 
   8   1 -13    0.22    0.90 
   7   1 -13    0.62    0.68 
   6   1 -13    0.41    0.51 
   5   1 -13    0.26    0.51 
   4   1 -13   -0.16    0.47 
   3   1 -13    0.04    0.23 
   3   1 -13    0.40    0.44 
   2   1 -13    0.61    0.44 
   2   1 -13    0.45    0.27 
   1   1 -13    0.19    0.21 
   1   1 -13    0.23    0.38 
   0   1 -13    2.98    0.65 
   0   1 -13    4.21    0.53 
  -1   1 -13    9.35    0.95 
  -1   1 -13    6.69    0.75 
  -2   1 -13    0.54    0.32 
  -2   1 -13   -0.04    0.26 
  -3   1 -13    1.99    0.50 
  -3   1 -13    0.77    0.40 
  -4   1 -13    3.66    0.67 
  -5   1 -13   -0.23    0.30 
  -6   1 -13    0.23    0.43 
   8   0 -13   -0.11    0.73 
   7   0 -13    0.42    0.61 
   6   0 -13    0.67    0.51 
   5   0 -13    0.27    0.48 
   4   0 -13    1.83    0.65 
   3   0 -13    0.53    0.35 
   3   0 -13    0.33    0.41 
   2   0 -13    1.86    0.60 
   2   0 -13    2.84    0.46 
   1   0 -13    0.24    0.19 
   1   0 -13    0.05    0.35 
   0   0 -13    0.02    0.33 
   0   0 -13    0.47    0.25 
  -1   0 -13    2.85    0.59 
  -1   0 -13    2.81    0.50 
  -2   0 -13    1.26    0.44 
  -2   0 -13    1.31    0.42 
  -3   0 -13    0.90    0.37 
  -3   0 -13    1.39    0.48 
  -4   0 -13    0.09    0.29 
  -5   0 -13    1.09    0.47 
  -6   0 -13    0.28    0.50 
   8  -1 -13    0.27    0.77 
   7  -1 -13    0.51    0.65 
   6  -1 -13    0.52    0.47 
   5  -1 -13    0.24    0.43 
   4  -1 -13    0.43    0.45 
   3  -1 -13    0.01    0.38 
   2  -1 -13   -0.12    0.37 
   2  -1 -13    0.27    0.24 
   1  -1 -13    3.14    0.42 
   1  -1 -13    2.29    0.61 
   0  -1 -13    1.04    0.42 
   0  -1 -13    1.08    0.30 
  -1  -1 -13    0.49    0.27 
  -1  -1 -13   -0.02    0.29 
  -2  -1 -13    1.35    0.48 
  -2  -1 -13    0.99    0.38 
  -3  -1 -13    0.44    0.37 
  -3  -1 -13    0.25    0.31 
  -4  -1 -13    0.39    0.33 
  -4  -1 -13    0.74    0.45 
  -5  -1 -13    0.13    0.40 
  -6  -1 -13    0.13    0.50 
   8  -2 -13   -0.79    0.65 
   7  -2 -13   -0.26    0.58 
   6  -2 -13    1.35    0.63 
   5  -2 -13   -0.59    0.36 
   4  -2 -13    1.42    0.57 
   3  -2 -13   -0.12    0.39 
   2  -2 -13    0.97    0.48 
   1  -2 -13    0.06    0.19 
   1  -2 -13    0.10    0.35 
   0  -2 -13    1.09    0.28 
   0  -2 -13    2.97    0.60 
  -1  -2 -13    0.43    0.36 
  -1  -2 -13    0.04    0.23 
  -2  -2 -13    0.46    0.38 
  -2  -2 -13    0.15    0.28 
  -3  -2 -13    0.92    0.39 
  -3  -2 -13    1.08    0.49 
  -4  -2 -13   -0.20    0.31 
  -4  -2 -13    0.34    0.45 
  -5  -2 -13    0.07    0.37 
  -6  -2 -13   -0.40    0.45 
   8  -3 -13    0.22    0.72 
   7  -3 -13    0.28    0.57 
   6  -3 -13    0.78    0.55 
   5  -3 -13    0.56    0.50 
   4  -3 -13    0.61    0.45 
  -4   3  13    0.29    0.34 
   3  -3 -13    0.89    0.49 
   2  -3 -13    0.92    0.46 
   1  -3 -13    2.97    0.66 
   0  -3 -13    4.25    0.48 
   0  -3 -13    2.27    0.58 
  -1  -3 -13    0.16    0.23 
  -1  -3 -13    0.28    0.35 
  -2  -3 -13    0.02    0.28 
  -2  -3 -13    0.60    0.40 
  -3  -3 -13    1.82    0.57 
  -3  -3 -13    1.43    0.46 
  -4  -3 -13    0.44    0.45 
  -4  -3 -13    0.59    0.43 
  -5  -3 -13    0.74    0.56 
  -5  -3 -13   -0.29    0.37 
  -6  -3 -13    0.02    0.50 
   8  -4 -13   -0.46    0.64 
   7  -4 -13    1.28    0.65 
   6  -4 -13    0.39    0.54 
   5  -4 -13    1.02    0.56 
   4  -4 -13    0.59    0.43 
  -4   4  13    1.60    0.51 
   3  -4 -13    0.12    0.35 
   2  -4 -13   -0.17    0.32 
   1  -4 -13    4.08    0.73 
   0  -4 -13    4.99    0.81 
  -1  -4 -13    4.79    0.62 
  -1  -4 -13    7.05    0.91 
  -2  -4 -13    0.91    0.46 
  -2  -4 -13    0.82    0.36 
  -3  -4 -13    0.30    0.35 
  -3  -4 -13   -0.41    0.36 
  -4  -4 -13   -0.17    0.42 
  -4  -4 -13    0.00    0.34 
  -5  -4 -13   -0.42    0.41 
  -5  -4 -13    0.29    0.56 
  -6  -4 -13    0.04    0.59 
   8  -5 -13   -0.69    0.69 
   7  -5 -13    0.96    0.64 
   6  -5 -13    0.25    0.49 
   5  -5 -13    1.53    0.61 
   4  -5 -13    1.55    0.59 
  -4   5  13    1.53    0.51 
   3  -5 -13   -0.01    0.32 
   2  -5 -13    0.64    0.42 
   1  -5 -13    2.46    0.60 
   0  -5 -13    5.48    0.85 
  -1  -5 -13    0.24    0.25 
  -1  -5 -13   -0.11    0.30 
  -2  -5 -13    1.27    0.41 
  -2  -5 -13    1.24    0.51 
  -3  -5 -13    0.25    0.36 
  -3  -5 -13   -0.20    0.39 
  -4  -5 -13   -0.07    0.39 
  -4  -5 -13    0.51    0.53 
  -5  -5 -13    0.55    0.60 
  -5  -5 -13   -0.50    0.41 
   8  -6 -13    0.09    0.70 
   7  -6 -13    0.60    0.62 
   6  -6 -13    0.57    0.48 
   5  -6 -13   -0.08    0.39 
  -5   6  13   -0.13    0.34 
   4  -6 -13    0.22    0.40 
  -4   6  13    0.29    0.41 
   3  -6 -13   -0.26    0.25 
  -3   6  13    0.41    0.42 
   2  -6 -13    0.32    0.40 
   1  -6 -13    0.68    0.42 
   0  -6 -13    2.09    0.59 
  -1  -6 -13    1.26    0.51 
  -2  -6 -13   -0.10    0.33 
  -2  -6 -13    0.35    0.44 
  -3  -6 -13    0.51    0.40 
  -3  -6 -13    0.10    0.44 
  -4  -6 -13    0.44    0.57 
  -4  -6 -13    1.01    0.49 
  -5  -6 -13    1.38    0.71 
  -5  -6 -13    0.82    0.60 
   7  -7 -13    0.96    0.70 
   6  -7 -13   -0.36    0.46 
   5  -7 -13    0.67    0.46 
  -5   7  13    1.04    0.53 
   4  -7 -13    0.04    0.39 
  -4   7  13    0.19    0.42 
   3  -7 -13    0.23    0.34 
  -3   7  13   -0.13    0.40 
   2  -7 -13    2.84    0.62 
   1  -7 -13    2.12    0.59 
   0  -7 -13    4.45    0.80 
  -1  -7 -13    0.11    0.43 
  -2  -7 -13   -0.09    0.38 
  -3  -7 -13    0.68    0.52 
  -3  -7 -13    0.24    0.41 
  -4  -7 -13    0.92    0.64 
  -4  -7 -13   -0.14    0.42 
  -5  -7 -13    0.62    0.67 
  -5  -7 -13   -1.08    0.50 
   7  -8 -13    0.34    0.67 
   6  -8 -13    0.27    0.56 
  -6   8  13   -0.27    0.40 
   5  -8 -13    0.37    0.39 
  -5   8  13   -0.16    0.41 
   4  -8 -13    0.14    0.41 
  -4   8  13    0.31    0.50 
   3  -8 -13    0.25    0.35 
  -3   8  13    0.33    0.42 
   2  -8 -13    2.86    0.65 
   1  -8 -13   -0.04    0.38 
   0  -8 -13   -0.11    0.31 
  -1  -8 -13    1.36    0.58 
  -2  -8 -13    2.85    0.76 
  -3  -8 -13    1.78    0.64 
  -4  -8 -13   -0.15    0.56 
  -5  -8 -13    1.15    0.71 
  -5  -8 -13    0.73    0.71 
   7  -9 -13    0.13    0.68 
   6  -9 -13    0.80    0.61 
  -6   9  13   -0.16    0.48 
   5  -9 -13    0.11    0.47 
  -5   9  13    0.09    0.43 
   4  -9 -13    0.16    0.41 
  -4   9  13   -0.42    0.43 
   3  -9 -13    0.75    0.40 
  -3   9  13   -0.08    0.44 
   2  -9 -13   -0.25    0.27 
   1  -9 -13   -0.07    0.29 
   0  -9 -13    0.35    0.42 
  -1  -9 -13   -0.04    0.43 
  -2  -9 -13    0.34    0.52 
  -3  -9 -13    0.32    0.58 
  -4  -9 -13    0.94    0.67 
   7 -10 -13    0.96    0.76 
   6 -10 -13    0.07    0.56 
  -6  10  13    0.19    0.51 
   5 -10 -13    0.41    0.50 
  -5  10  13   -0.54    0.43 
   4 -10 -13    1.03    0.51 
  -4  10  13    0.17    0.48 
   3 -10 -13    0.57    0.40 
  -3  10  13   -0.02    0.44 
   2 -10 -13    0.26    0.37 
   1 -10 -13    1.08    0.49 
   0 -10 -13   -0.23    0.41 
  -1 -10 -13    0.69    0.54 
  -2 -10 -13    0.27    0.59 
  -3 -10 -13    0.12    0.55 
  -4 -10 -13    0.74    0.71 
   6 -11 -13   -0.18    0.59 
  -6  11  13    0.10    0.54 
   5 -11 -13    0.09    0.52 
  -5  11  13   -0.55    0.46 
   4 -11 -13    0.07    0.42 
  -4  11  13    0.27    0.50 
   3 -11 -13    0.56    0.47 
  -3  11  13    1.90    0.68 
   2 -11 -13    0.23    0.35 
   1 -11 -13   -0.13    0.34 
   0 -11 -13    0.35    0.37 
  -1 -11 -13   -0.32    0.46 
  -2 -11 -13    0.56    0.58 
  -3 -11 -13    0.63    0.64 
   6 -12 -13    0.34    0.63 
  -6  12  13    0.41    0.59 
   5 -12 -13   -0.13    0.53 
  -5  12  13   -0.19    0.50 
   4 -12 -13    0.49    0.49 
  -4  12  13    0.77    0.61 
   3 -12 -13   -0.06    0.40 
  -3  12  13   -0.23    0.45 
   2 -12 -13   -0.25    0.37 
   1 -12 -13    0.34    0.40 
   0 -12 -13    0.32    0.38 
  -1 -12 -13   -0.10    0.52 
  -2 -12 -13    0.62    0.62 
  -3 -12 -13    0.37    0.63 
   6 -13 -13   -0.28    0.66 
  -6  13  13   -0.39    0.53 
   5 -13 -13   -0.41    0.55 
  -5  13  13   -0.07    0.55 
   4 -13 -13    1.07    0.60 
  -4  13  13    1.35    0.69 
   3 -13 -13    0.32    0.48 
  -3  13  13   -0.06    0.56 
   2 -13 -13    0.23    0.42 
   1 -13 -13    0.46    0.43 
   0 -13 -13    0.18    0.43 
  -1 -13 -13    1.31    0.64 
  -2 -13 -13    0.55    0.64 
   5 -14 -13    0.04    0.66 
  -5  14  13   -0.59    0.52 
   4 -14 -13    0.08    0.49 
  -4  14  13   -0.35    0.57 
   3 -14 -13   -0.25    0.46 
  -3  14  13    0.00    0.58 
   2 -14 -13    0.44    0.54 
   1 -14 -13   -0.06    0.47 
   0 -14 -13    0.78    0.53 
  -1 -14 -13    0.95    0.63 
   4 -15 -13    0.76    0.69 
  -4  15  13   -0.11    0.55 
   3 -15 -13   -0.58    0.50 
  -3  15  13    0.21    0.58 
   2 -15 -13   -0.09    0.47 
   1 -15 -13    0.11    0.53 
   0 -15 -13    0.24    0.55 
   2 -16 -13    0.66    0.69 
   1  16 -14    0.85    0.68 
   0  16 -14   -0.06    0.58 
  -1  16 -14    0.71    0.62 
  -2  16 -14    0.16    0.58 
   2  15 -14    0.58    0.61 
   1  15 -14    0.16    0.49 
   0  15 -14    0.40    0.56 
  -1  15 -14    0.00    0.56 
  -2  15 -14   -0.07    0.55 
  -3  15 -14    0.03    0.54 
   3  14 -14    0.57    0.59 
   2  14 -14    0.39    0.51 
   1  14 -14    0.36    0.50 
   0  14 -14    0.04    0.46 
  -1  14 -14   -0.07    0.39 
  -2  14 -14    0.01    0.50 
  -3  14 -14    0.17    0.54 
  -4  14 -14    0.90    0.61 
   4  13 -14   -0.31    0.66 
  -4 -13  14    0.26    0.60 
   3  13 -14    0.37    0.52 
   2  13 -14    0.11    0.45 
   1  13 -14    0.05    0.42 
   0  13 -14    0.38    0.41 
  -1  13 -14    0.26    0.41 
  -2  13 -14   -0.76    0.34 
  -3  13 -14   -0.03    0.57 
  -4  13 -14   -0.43    0.41 
   4  12 -14    0.00    0.63 
  -4 -12  14   -0.24    0.46 
   3  12 -14   -0.29    0.43 
  -3 -12  14    0.04    0.44 
   2  12 -14    0.07    0.38 
   1  12 -14    0.40    0.38 
   0  12 -14   -0.17    0.31 
  -1  12 -14    1.38    0.52 
  -2  12 -14    0.13    0.42 
  -3  12 -14    0.30    0.46 
  -4  12 -14    0.77    0.60 
  -5  12 -14    0.53    0.51 
   5  11 -14   -0.24    0.69 
  -5 -11  14    0.35    0.56 
   4  11 -14   -0.91    0.60 
   4  11 -14    0.51    0.55 
   3  11 -14    0.42    0.53 
   3  11 -14   -0.22    0.54 
   2  11 -14    0.77    0.51 
   1  11 -14    0.21    0.43 
   0  11 -14   -0.12    0.31 
  -1  11 -14    2.16    0.56 
  -2  11 -14   -0.12    0.35 
  -3  11 -14    1.06    0.51 
  -4  11 -14    0.05    0.52 
  -5  11 -14    0.69    0.57 
   5  10 -14    0.50    0.76 
   5  10 -14   -0.29    0.61 
   4  10 -14    0.27    0.60 
   4  10 -14    0.58    0.54 
   3  10 -14    0.25    0.54 
   3  10 -14   -0.08    0.40 
   2  10 -14    0.39    0.37 
   2  10 -14    0.42    0.48 
   1  10 -14   -0.21    0.31 
   0  10 -14    0.10    0.34 
  -1  10 -14   -0.36    0.25 
  -2  10 -14    0.28    0.35 
  -3  10 -14    0.89    0.45 
  -4  10 -14    0.16    0.40 
  -5  10 -14   -0.33    0.45 
   6   9 -14    0.83    0.87 
   6   9 -14    0.38    0.73 
   5   9 -14   -0.31    0.59 
   5   9 -14    0.12    0.66 
   4   9 -14   -0.01    0.57 
   4   9 -14   -0.44    0.47 
   3   9 -14   -0.13    0.38 
   3   9 -14    0.37    0.54 
   2   9 -14    0.92    0.47 
   2   9 -14    0.74    0.52 
   1   9 -14   -0.65    0.36 
   1   9 -14    0.47    0.30 
   0   9 -14    0.41    0.32 
  -1   9 -14   -0.24    0.27 
  -2   9 -14    0.25    0.33 
  -3   9 -14    0.80    0.44 
  -4   9 -14    0.33    0.41 
  -5   9 -14    0.22    0.42 
  -6   9 -14   -0.20    0.47 
   6   8 -14   -0.13    0.70 
   6   8 -14    0.84    0.81 
   5   8 -14   -0.04    0.56 
   5   8 -14   -0.37    0.59 
   4   8 -14    0.10    0.55 
   4   8 -14   -0.06    0.46 
   3   8 -14    0.79    0.47 
   3   8 -14    0.51    0.55 
   2   8 -14    0.14    0.43 
   2   8 -14    0.07    0.36 
   1   8 -14    0.92    0.39 
   1   8 -14   -0.46    0.38 
   0   8 -14   -0.01    0.29 
  -1   8 -14    0.84    0.34 
  -2   8 -14    1.79    0.49 
  -3   8 -14    0.30    0.32 
  -4   8 -14   -0.39    0.29 
  -5   8 -14   -0.64    0.36 
  -6   8 -14   -0.02    0.50 
   6   7 -14   -0.20    0.66 
   6   7 -14    0.19    0.75 
   5   7 -14   -0.06    0.60 
   5   7 -14    0.13    0.57 
   4   7 -14    1.15    0.65 
   4   7 -14    1.88    0.66 
   3   7 -14    0.73    0.59 
   3   7 -14    1.14    0.49 
   2   7 -14    3.37    0.77 
   2   7 -14    3.15    0.64 
   1   7 -14    3.45    0.64 
   1   7 -14    4.11    0.74 
   0   7 -14    0.30    0.31 
   0   7 -14    0.02    0.28 
  -1   7 -14    2.08    0.50 
  -2   7 -14    0.01    0.28 
  -3   7 -14    0.10    0.32 
  -4   7 -14    0.20    0.36 
  -5   7 -14    1.19    0.51 
  -6   7 -14    0.92    0.57 
   6   6 -14   -0.14    0.69 
   6   6 -14    0.39    0.77 
   5   6 -14    0.30    0.66 
   5   6 -14    0.57    0.58 
   4   6 -14   -0.09    0.50 
   4   6 -14   -0.33    0.41 
   3   6 -14    3.11    0.68 
   3   6 -14    2.26    0.69 
   2   6 -14   -0.33    0.39 
   2   6 -14    0.19    0.30 
   1   6 -14    0.20    0.38 
   1   6 -14    1.16    0.39 
   0   6 -14    1.03    0.37 
   0   6 -14    0.44    0.34 
  -1   6 -14    0.54    0.31 
  -2   6 -14    0.16    0.29 
  -3   6 -14   -0.15    0.28 
  -4   6 -14    0.22    0.36 
  -5   6 -14    0.13    0.36 
  -6   6 -14    0.77    0.54 
   7   5 -14   -0.07    0.66 
   6   5 -14    0.62    0.76 
   5   5 -14   -0.08    0.61 
   5   5 -14    0.19    0.56 
   4   5 -14    3.02    0.87 
   4   5 -14    2.10    0.71 
   3   5 -14    0.14    0.35 
   3   5 -14   -0.26    0.42 
   2   5 -14    5.36    0.76 
   2   5 -14    4.06    0.81 
   1   5 -14    0.19    0.40 
   1   5 -14    0.35    0.33 
   0   5 -14    0.40    0.34 
   0   5 -14    0.94    0.44 
  -1   5 -14    1.61    0.43 
  -1   5 -14    3.42    0.56 
  -2   5 -14    0.75    0.36 
  -3   5 -14    0.48    0.34 
  -4   5 -14    1.81    0.55 
  -5   5 -14    0.86    0.45 
  -6   5 -14    0.61    0.53 
   7   4 -14    0.46    0.77 
   6   4 -14   -0.10    0.59 
   5   4 -14    3.32    0.89 
   5   4 -14    2.06    0.79 
   4   4 -14    0.47    0.53 
   4   4 -14    0.19    0.44 
   3   4 -14    6.61    0.87 
   3   4 -14    6.81    1.07 
   2   4 -14    0.82    0.52 
   2   4 -14    1.16    0.43 
   1   4 -14    0.77    0.32 
   1   4 -14    0.61    0.44 
   0   4 -14    2.05    0.45 
   0   4 -14    3.43    0.66 
  -1   4 -14    0.85    0.37 
  -1   4 -14    0.65    0.36 
  -2   4 -14    5.26    0.73 
  -3   4 -14   -0.19    0.28 
  -4   4 -14    0.34    0.34 
  -5   4 -14   -0.06    0.42 
  -6   4 -14    0.45    0.56 
   7   3 -14    0.40    0.70 
   6   3 -14    0.02    0.57 
   5   3 -14    0.06    0.62 
   4   3 -14    3.95    0.88 
   4   3 -14    4.09    0.80 
   3   3 -14    0.42    0.52 
   3   3 -14    0.37    0.35 
   2   3 -14    1.24    0.42 
   2   3 -14    0.42    0.43 
   1   3 -14    2.20    0.61 
   1   3 -14    1.87    0.44 
   0   3 -14    3.99    0.57 
   0   3 -14    3.75    0.74 
  -1   3 -14    2.38    0.49 
  -1   3 -14    1.76    0.51 
  -2   3 -14   -0.16    0.24 
  -2   3 -14    0.37    0.30 
  -3   3 -14    0.15    0.32 
  -4   3 -14    0.36    0.36 
  -5   3 -14    0.08    0.41 
  -6   3 -14    0.41    0.52 
   7   2 -14    0.10    0.66 
   6   2 -14    0.44    0.67 
   5   2 -14   -0.29    0.45 
   4   2 -14    0.16    0.51 
   3   2 -14    1.29    0.58 
   3   2 -14    1.38    0.46 
   2   2 -14    0.03    0.26 
   2   2 -14    0.04    0.41 
   1   2 -14    0.23    0.24 
   1   2 -14    0.37    0.41 
   0   2 -14    0.35    0.27 
   0   2 -14   -0.33    0.35 
  -1   2 -14    9.31    0.93 
  -1   2 -14   12.09    1.14 
  -2   2 -14    1.24    0.48 
  -2   2 -14    1.13    0.38 
  -3   2 -14    0.49    0.34 
  -4   2 -14    0.64    0.41 
  -5   2 -14    0.09    0.38 
  -6   2 -14   -0.08    0.52 
   7   1 -14    1.02    0.73 
   6   1 -14    0.28    0.65 
   5   1 -14    1.02    0.63 
   4   1 -14    1.85    0.69 
   3   1 -14    1.77    0.63 
   3   1 -14    2.24    0.49 
   2   1 -14    0.31    0.22 
   2   1 -14    1.69    0.59 
   1   1 -14   -0.08    0.37 
   1   1 -14    0.16    0.21 
   0   1 -14    0.28    0.38 
   0   1 -14    0.13    0.24 
  -1   1 -14    0.24    0.27 
  -1   1 -14    0.78    0.42 
  -2   1 -14    1.15    0.40 
  -2   1 -14    0.56    0.39 
  -3   1 -14    0.84    0.37 
  -3   1 -14   -0.05    0.39 
  -4   1 -14    0.19    0.37 
  -5   1 -14    1.67    0.61 
  -6   1 -14    0.05    0.47 
   7   0 -14   -0.32    0.58 
   6   0 -14    0.35    0.54 
   5   0 -14   -0.02    0.49 
   4   0 -14    0.44    0.50 
   3   0 -14    0.10    0.43 
   2   0 -14    0.24    0.28 
   2   0 -14   -0.05    0.42 
   1   0 -14    0.85    0.51 
   1   0 -14    0.00    0.17 
   0   0 -14    3.48    0.71 
   0   0 -14    5.30    0.59 
  -1   0 -14    1.81    0.42 
  -1   0 -14    1.88    0.53 
  -2   0 -14    0.49    0.42 
  -2   0 -14    0.01    0.28 
  -3   0 -14   -0.17    0.35 
  -3   0 -14    0.23    0.33 
  -4   0 -14    0.05    0.35 
  -5   0 -14    0.17    0.40 
  -6   0 -14   -0.25    0.44 
   7  -1 -14    0.14    0.60 
   6  -1 -14   -0.17    0.41 
   5  -1 -14    0.29    0.61 
   4  -1 -14   -0.32    0.41 
   3  -1 -14    0.51    0.47 
   2  -1 -14    0.63    0.46 
   1  -1 -14    0.79    0.45 
   1  -1 -14    1.24    0.33 
   0  -1 -14    2.14    0.57 
   0  -1 -14    1.59    0.36 
  -1  -1 -14   -0.06    0.26 
  -1  -1 -14   -0.25    0.30 
  -2  -1 -14    0.18    0.38 
  -2  -1 -14    0.34    0.33 
  -3  -1 -14    0.92    0.45 
  -3  -1 -14    0.43    0.38 
  -4  -1 -14    0.52    0.38 
  -4  -1 -14    1.28    0.56 
  -5  -1 -14    0.11    0.38 
  -6  -1 -14   -0.23    0.51 
   7  -2 -14    0.06    0.59 
   6  -2 -14    0.70    0.54 
   5  -2 -14    0.14    0.46 
   4  -2 -14    0.08    0.45 
   3  -2 -14    3.40    0.81 
   2  -2 -14   -0.05    0.40 
   1  -2 -14    0.09    0.39 
   0  -2 -14    0.59    0.43 
   0  -2 -14    0.64    0.25 
  -1  -2 -14   -0.34    0.30 
  -1  -2 -14   -0.08    0.25 
  -2  -2 -14   -0.31    0.35 
  -2  -2 -14    0.27    0.35 
  -3  -2 -14    0.15    0.40 
  -3  -2 -14    0.29    0.30 
  -4  -2 -14    0.50    0.41 
  -4  -2 -14   -0.22    0.46 
  -5  -2 -14    0.33    0.43 
  -6  -2 -14    0.35    0.57 
   7  -3 -14    0.20    0.59 
   6  -3 -14    0.32    0.47 
   5  -3 -14   -0.17    0.45 
   4  -3 -14   -0.05    0.47 
   3  -3 -14   -0.45    0.36 
   2  -3 -14    1.19    0.54 
   1  -3 -14   -0.20    0.36 
   0  -3 -14    0.59    0.43 
  -1  -3 -14    1.10    0.36 
  -1  -3 -14    0.95    0.47 
  -2  -3 -14    0.45    0.38 
  -2  -3 -14    0.36    0.32 
  -3  -3 -14   -0.11    0.37 
  -3  -3 -14   -0.06    0.30 
  -4  -3 -14    0.35    0.49 
  -4  -3 -14    0.00    0.40 
  -5  -3 -14   -0.12    0.43 
   7  -4 -14    0.38    0.62 
   6  -4 -14    0.28    0.53 
   5  -4 -14    0.38    0.49 
   4  -4 -14    0.21    0.37 
   3  -4 -14    0.25    0.45 
   2  -4 -14    1.17    0.52 
   1  -4 -14    1.03    0.47 
   0  -4 -14    0.09    0.34 
  -1  -4 -14    1.42    0.51 
  -2  -4 -14    0.45    0.43 
  -2  -4 -14    0.92    0.38 
  -3  -4 -14    0.20    0.46 
  -3  -4 -14   -0.33    0.28 
  -4  -4 -14   -0.15    0.44 
  -4  -4 -14   -0.22    0.34 
  -5  -4 -14    0.48    0.60 
  -5  -4 -14   -0.07    0.43 
   7  -5 -14    0.41    0.61 
   6  -5 -14    0.21    0.52 
   5  -5 -14    0.29    0.45 
   4  -5 -14    0.30    0.41 
  -4   5  14   -0.34    0.38 
   3  -5 -14   -0.24    0.41 
   2  -5 -14    2.68    0.68 
   1  -5 -14   -0.10    0.36 
   0  -5 -14    4.87    0.87 
  -1  -5 -14    0.34    0.40 
  -2  -5 -14    0.09    0.40 
  -2  -5 -14    0.37    0.39 
  -3  -5 -14    0.03    0.46 
  -3  -5 -14    0.59    0.39 
  -4  -5 -14    0.24    0.41 
  -4  -5 -14    0.65    0.58 
  -5  -5 -14    0.41    0.59 
  -5  -5 -14   -0.03    0.50 
   7  -6 -14   -0.08    0.60 
   6  -6 -14    0.33    0.48 
   5  -6 -14   -0.38    0.39 
   4  -6 -14    0.68    0.49 
  -4   6  14    0.05    0.45 
   3  -6 -14    0.49    0.42 
   2  -6 -14    3.70    0.77 
   1  -6 -14    1.91    0.61 
   0  -6 -14    0.74    0.49 
  -1  -6 -14   -0.25    0.33 
  -2  -6 -14   -0.04    0.42 
  -3  -6 -14    0.52    0.50 
  -4  -6 -14    0.08    0.45 
  -4  -6 -14    0.42    0.58 
  -5  -6 -14    0.10    0.54 
  -5  -6 -14    0.33    0.64 
   7  -7 -14   -0.45    0.65 
   6  -7 -14   -0.62    0.56 
   5  -7 -14   -0.16    0.39 
  -5   7  14   -0.22    0.42 
   4  -7 -14    1.38    0.60 
  -4   7  14    2.29    0.65 
   3  -7 -14    0.17    0.39 
   2  -7 -14    7.32    1.10 
   1  -7 -14   -0.09    0.36 
   0  -7 -14    1.23    0.52 
  -1  -7 -14    4.23    0.84 
  -2  -7 -14    0.45    0.48 
  -3  -7 -14    2.31    0.75 
  -4  -7 -14   -0.04    0.55 
   7  -8 -14    0.75    0.79 
   6  -8 -14   -0.02    0.54 
   5  -8 -14    0.12    0.47 
  -5   8  14    0.52    0.51 
   4  -8 -14   -0.22    0.34 
  -4   8  14    0.08    0.47 
   3  -8 -14    1.77    0.57 
   2  -8 -14    0.22    0.36 
   1  -8 -14    0.54    0.45 
   0  -8 -14    0.56    0.48 
  -1  -8 -14   -0.23    0.45 
  -2  -8 -14   -0.30    0.51 
  -3  -8 -14    1.03    0.68 
  -4  -8 -14    0.46    0.63 
   7  -9 -14   -0.63    0.67 
   6  -9 -14    0.55    0.64
[truncated: 42,576 more chars]
